# Supplementary material for: Technical Note: Comparison of methane ebullition modelling approaches used in terrestrial wetland models
Source: Copernicus journal article supplement (doi:10.5194/bg-2017-274), 2017-07-04
Supplement: Supplementary file 2 [file bg-2017-274-supplement.zip]

Archive with 13 entries (10 files):
- ebullition_module/
- ebullition_module/bubble_module_readme.pdf
- ebullition_module/input/
- ebullition_module/input/CH4prof.txt
- ebullition_module/input/meteo.txt
- ebullition_module/input/Tprof.txt
- ebullition_module/License_BSD2.txt
- ebullition_module/src/
- ebullition_module/src/bubble_geometry.f90
- ebullition_module/src/bubble_main.f90
- ebullition_module/src/bubble_output.f90
- ebullition_module/src/bubble_parameters.f90
- ebullition_module/src/Makefile
