# Supplementary material for: Technical Note: Comparison of methane ebullition modelling approaches used in terrestrial wetland models
Source: Copernicus journal article supplement (doi:10.5194/bg-2017-274), 2017-07-04
Supplement: Supplementary file 2 [file bg-2017-274-supplement.zip › ebullition_module/input/CH4prof.txt]

0.00000000 0.00000000 0.00000000 0.03100937 0.24362134 0.65012849 0.89725906 0.92886073 0.94386848 0.95631245 0.96652736
0.00000000 0.00000000 0.00000000 0.03104786 0.24443962 0.64784091 0.89979994 0.93158022 0.94633489 0.95852543 0.96851987
0.00000000 0.00000000 0.00000000 0.03108636 0.24525790 0.64555334 0.90234083 0.93429972 0.94880130 0.96073840 0.97051238
0.00000000 0.00000000 0.00000000 0.03112485 0.24607618 0.64326576 0.90488171 0.93701921 0.95126772 0.96295138 0.97250488
0.00000000 0.00000000 0.00000000 0.03116334 0.24689446 0.64097819 0.90742259 0.93973871 0.95373413 0.96516436 0.97449739
0.00000000 0.00000000 0.00000000 0.03120183 0.24771274 0.63869061 0.90996347 0.94245820 0.95620054 0.96737733 0.97648989
0.00000000 0.00000000 0.00000000 0.03124032 0.24853103 0.63640303 0.91250435 0.94517770 0.95866695 0.96959031 0.97848240
0.00000000 0.00000000 0.00000000 0.03127882 0.24934931 0.63411546 0.91504523 0.94789719 0.96113336 0.97180329 0.98047490
0.00000000 0.00000000 0.00000000 0.03131731 0.25016759 0.63182788 0.91758611 0.95061669 0.96359977 0.97401626 0.98246741
0.00000000 0.00000000 0.00000000 0.03135580 0.25098587 0.62954031 0.92012699 0.95333618 0.96606618 0.97622924 0.98445992
0.00000000 0.00000000 0.00000000 0.03139429 0.25180415 0.62725273 0.92266787 0.95605568 0.96853259 0.97844222 0.98645242
0.00000000 0.00000000 0.00000000 0.03143279 0.25262243 0.62496516 0.92520875 0.95877517 0.97099900 0.98065519 0.98844493
0.00000000 0.00000000 0.00000000 0.03147128 0.25344071 0.62267758 0.92774963 0.96149466 0.97346541 0.98286817 0.99043743
0.00000000 0.00000000 0.00000000 0.03150977 0.25425900 0.62039001 0.93029051 0.96421416 0.97593182 0.98508115 0.99242994
0.00000000 0.00000000 0.00000000 0.03154826 0.25507728 0.61810243 0.93283139 0.96693365 0.97839823 0.98729412 0.99442244
0.00000000 0.00000000 0.00000000 0.03158676 0.25589556 0.61581485 0.93537227 0.96965315 0.98086464 0.98950710 0.99641495
0.00000000 0.00000000 0.00000000 0.03162525 0.25671384 0.61352728 0.93791315 0.97237264 0.98333105 0.99172008 0.99840746
0.00000000 0.00000000 0.00000000 0.03166374 0.25753212 0.61123970 0.94045403 0.97509214 0.98579746 0.99393305 1.00039996
0.00000000 0.00000000 0.00000000 0.03170223 0.25835040 0.60895213 0.94299492 0.97781163 0.98826387 0.99614603 1.00239247
0.00000000 0.00000000 0.00000000 0.03174072 0.25916868 0.60666455 0.94553580 0.98053113 0.99073028 0.99835901 1.00438497
0.00000000 0.00000000 0.00000000 0.03195075 0.25943600 0.60621904 0.94717646 0.98219768 0.99225968 0.99976383 1.00568873
0.00000000 0.00000000 0.00000000 0.03215739 0.25969959 0.60578135 0.94840079 0.98344045 0.99336935 1.00075319 1.00658149
0.00000000 0.00000000 0.00000000 0.03235689 0.25995504 0.60534671 0.94968187 0.98474280 0.99453859 1.00180108 1.00753119
0.00000000 0.00000000 0.00000000 0.03255838 0.26021318 0.60492407 0.95027472 0.98534448 0.99501626 1.00216765 1.00781034
0.00000000 0.00000000 0.00000000 0.03275753 0.26046852 0.60450674 0.95065411 0.98572874 0.99528048 1.00232456 1.00788348
0.00000000 0.00000000 0.00000000 0.03295124 0.26071762 0.60409193 0.95152203 0.98661718 0.99604927 1.00298423 1.00845638
0.00000000 0.00000000 0.00000000 0.03313659 0.26095712 0.60367736 0.95246598 0.98758232 0.99689308 1.00371627 1.00909847
0.00000000 0.00000000 0.00000000 0.03331944 0.26119387 0.60326881 0.95302832 0.98815715 0.99735064 1.00406656 1.00936345
0.00000000 0.00000000 0.00000000 0.03350025 0.26142811 0.60286512 0.95321904 0.98835078 0.99743095 1.00404403 1.00926018
0.00000000 0.00000000 0.00000000 0.03367882 0.26165971 0.60246609 0.95373443 0.98888160 0.99785141 1.00436293 1.00949870
0.00000000 0.00000000 0.00000000 0.03385201 0.26188905 0.60207240 0.95427779 0.98944378 0.99830646 1.00471895 1.00977639
0.00000000 0.00000000 0.00000000 0.03402244 0.26211566 0.60168361 0.95469336 0.98987636 0.99863527 1.00495186 1.00993388
0.00000000 0.00000000 0.00000000 0.03418588 0.26233458 0.60129464 0.95503691 0.99023223 0.99888652 1.00510606 1.01001127
0.00000000 0.00000000 0.00000000 0.03434318 0.26254627 0.60090553 0.95523436 0.99043500 0.99898426 1.00510633 1.00993413
0.00000000 0.00000000 0.00000000 0.03449840 0.26275544 0.60051986 0.95508155 0.99027716 0.99872500 1.00475379 1.00950856
0.00000000 0.00000000 0.00000000 0.03465169 0.26296215 0.60013689 0.95482740 0.99001515 0.99836471 1.00430326 1.00898779
0.00000000 0.00000000 0.00000000 0.03480274 0.26316600 0.59975675 0.95502423 0.99021967 0.99847294 1.00432135 1.00893465
0.00000000 0.00000000 0.00000000 0.03494780 0.26336268 0.59937658 0.95551816 0.99072918 0.99888494 1.00464060 1.00917924
0.00000000 0.00000000 0.00000000 0.03508681 0.26355221 0.59899586 0.95539558 0.99059918 0.99865743 1.00432194 1.00878820
0.00000000 0.00000000 0.00000000 0.03522396 0.26373937 0.59861917 0.95602061 0.99124373 0.99920636 1.00477875 1.00917009
0.00000000 0.00000000 0.00000000 0.03535943 0.26392422 0.59824855 0.95720156 0.99246650 1.00033570 1.00581582 1.01013089
0.00000000 0.00000000 0.00000000 0.03549320 0.26410678 0.59788442 0.95814685 0.99344942 1.00122821 1.00661937 1.01086154
0.00000000 0.00000000 0.00000000 0.03562498 0.26428687 0.59752646 0.95921449 0.99456243 1.00225339 1.00755726 1.01172766
0.00000000 0.00000000 0.00000000 0.03575515 0.26446476 0.59717512 0.96040026 0.99580134 1.00340697 1.00862517 1.01272493
0.00000000 0.00000000 0.00000000 0.03588374 0.26464048 0.59683071 0.96170132 0.99716344 1.00468618 1.00982027 1.01385045
0.00000000 0.00000000 0.00000000 0.03601035 0.26481411 0.59649354 0.96311100 0.99864200 1.00608425 1.01113578 1.01509743
0.00000000 0.00000000 0.00000000 0.03613190 0.26498592 0.59616371 0.96445241 1.00005383 1.00741808 1.01238927 1.01628445
0.00000000 0.00000000 0.00000000 0.03624493 0.26514754 0.59583376 0.96607024 1.00174866 1.00903025 1.01391512 1.01773716
0.00000000 0.00000000 0.00000000 0.03635509 0.26530567 0.59551037 0.96768126 1.00343976 1.01064003 1.01543948 1.01918902
0.00000000 0.00000000 0.00000000 0.03646985 0.26546885 0.59520112 0.96906140 1.00490228 1.01202986 1.01675275 1.02043870
0.00000000 0.00000000 0.00000000 0.03658344 0.26563013 0.59489878 0.97036996 1.00629403 1.01335123 1.01799965 1.02162394
0.00000000 0.00000000 0.00000000 0.03669126 0.26578440 0.59459891 0.97196490 1.00798157 1.01496619 1.01953658 1.02309491
0.00000000 0.00000000 0.00000000 0.03679568 0.26593454 0.59430440 0.97346078 1.00956832 1.01648085 1.02097360 1.02446632
0.00000000 0.00000000 0.00000000 0.03689878 0.26608282 0.59401709 0.97492518 1.01112598 1.01796868 1.02238573 1.02581455
0.00000000 0.00000000 0.00000000 0.03700066 0.26622931 0.59373683 0.97636338 1.01265985 1.01943489 1.02377809 1.02714467
0.00000000 0.00000000 0.00000000 0.03710135 0.26637404 0.59346315 0.97756399 1.01395028 1.02065995 1.02493205 1.02823926
0.00000000 0.00000000 0.00000000 0.03720088 0.26651690 0.59319481 0.97840609 1.01487058 1.02151686 1.02572078 1.02897191
0.00000000 0.00000000 0.00000000 0.03729402 0.26665287 0.59292694 0.97947290 1.01602107 1.02260148 1.02673364 1.02992452
0.00000000 0.00000000 0.00000000 0.03738108 0.26678345 0.59266149 0.98071172 1.01734897 1.02386225 1.02792048 1.03104846
0.00000000 0.00000000 0.00000000 0.03748431 0.26693365 0.59242203 0.98187933 1.01862432 1.02509020 1.02909390 1.03217808
0.00000000 0.00000000 0.00000000 0.03758534 0.26708071 0.59218670 0.98293454 1.01978313 1.02620189 1.03015142 1.03319213
0.00000000 0.00000000 0.00000000 0.03768280 0.26722387 0.59195444 0.98384183 1.02078763 1.02715906 1.03105451 1.03405180
0.00000000 0.00000000 0.00000000 0.03777708 0.26736329 0.59172491 0.98460834 1.02164502 1.02796903 1.03181060 1.03476469
0.00000000 0.00000000 0.00000000 0.03786802 0.26749879 0.59149743 0.98523547 1.02235618 1.02863249 1.03242020 1.03533111
0.00000000 0.00000000 0.00000000 0.03795576 0.26763060 0.59127171 0.98572974 1.02292772 1.02915623 1.03289027 1.03575821
0.00000000 0.00000000 0.00000000 0.03804041 0.26775878 0.59104739 0.98609207 1.02336035 1.02954098 1.03322164 1.03604688
0.00000000 0.00000000 0.00000000 0.03812237 0.26788355 0.59082419 0.98632459 1.02365615 1.02978898 1.03341671 1.03619969
0.00000000 0.00000000 0.00000000 0.03820095 0.26800453 0.59060076 0.98608808 1.02346154 1.02954655 1.03312299 1.03586600
0.00000000 0.00000000 0.00000000 0.03827734 0.26812254 0.59037664 0.98555006 1.02295042 1.02898816 1.03251501 1.03522004
0.00000000 0.00000000 0.00000000 0.03835137 0.26823752 0.59015071 0.98466020 1.02206963 1.02806061 1.03153974 1.03420907
0.00000000 0.00000000 0.00000000 0.03842361 0.26835024 0.58992404 0.98434591 1.02178421 1.02772875 1.03115826 1.03378874
0.00000000 0.00000000 0.00000000 0.03849450 0.26846115 0.58969873 0.98452643 1.02201213 1.02791101 1.03128970 1.03387905
0.00000000 0.00000000 0.00000000 0.03857671 0.26858467 0.58948918 0.98479199 1.02234077 1.02820688 1.03154704 1.03410709
0.00000000 0.00000000 0.00000000 0.03865874 0.26870747 0.58928404 0.98578054 1.02342265 1.02925728 1.03255722 1.03508474
0.00000000 0.00000000 0.00000000 0.03873939 0.26882850 0.58908393 0.98705756 1.02480621 1.03061004 1.03386912 1.03636276
0.00000000 0.00000000 0.00000000 0.03881841 0.26894758 0.58888866 0.98808661 1.02593293 1.03170653 1.03492611 1.03738748
0.00000000 0.00000000 0.00000000 0.03889528 0.26906428 0.58869661 0.98862143 1.02654514 1.03228878 1.03547101 1.03790297
0.00000000 0.00000000 0.00000000 0.03896998 0.26917861 0.58850657 0.98889588 1.02688525 1.03259919 1.03574526 1.03814930
0.00000000 0.00000000 0.00000000 0.03904254 0.26929059 0.58831824 0.98926306 1.02732075 1.03300510 1.03611470 1.03849012
0.00000000 0.00000000 0.00000000 0.03911298 0.26940024 0.58813127 0.98933311 1.02744537 1.03310036 1.03617489 1.03852346
0.00000000 0.00000000 0.00000000 0.03918132 0.26950756 0.58794466 0.98907215 1.02722308 1.03284895 1.03589001 1.03821375
0.00000000 0.00000000 0.00000000 0.03924759 0.26961255 0.58775805 0.98892137 1.02711325 1.03271008 1.03571732 1.03801548
0.00000000 0.00000000 0.00000000 0.03931178 0.26971522 0.58757119 0.98852236 1.02674234 1.03231034 1.03528501 1.03755914
0.00000000 0.00000000 0.00000000 0.03937391 0.26981557 0.58738356 0.98804852 1.02629073 1.03183002 1.03477262 1.03702316
0.00000000 0.00000000 0.00000000 0.03943399 0.26991357 0.58719528 0.98772341 1.02599160 1.03150220 1.03441222 1.03663820
0.00000000 0.00000000 0.00000000 0.03949201 0.27000923 0.58700640 0.98730594 1.02559380 1.03107585 1.03395383 1.03615582
0.00000000 0.00000000 0.00000000 0.03954798 0.27010252 0.58681643 0.98667903 1.02497496 1.03042860 1.03327567 1.03545501
0.00000000 0.00000000 0.00000000 0.03960186 0.27019342 0.58662556 0.98639839 1.02471484 1.03014001 1.03295473 1.03510917
0.00000000 0.00000000 0.00000000 0.03965362 0.27028189 0.58643496 0.98652166 1.02487463 1.03027129 1.03305194 1.03517885
0.00000000 0.00000000 0.00000000 0.03970325 0.27036789 0.58624586 0.98706076 1.02546790 1.03083605 1.03358083 1.03567748
0.00000000 0.00000000 0.00000000 0.03975068 0.27045137 0.58605852 0.98737730 1.02582884 1.03116858 1.03387850 1.03594623
0.00000000 0.00000000 0.00000000 0.03979586 0.27053227 0.58587242 0.98764572 1.02613915 1.03145054 1.03412588 1.03616492
0.00000000 0.00000000 0.00000000 0.03983870 0.27061052 0.58568719 0.98776814 1.02629646 1.03157960 1.03422108 1.03623229
0.00000000 0.00000000 0.00000000 0.03987909 0.27068600 0.58550210 0.98763579 1.02618673 1.03144174 1.03405059 1.03603558
0.00000000 0.00000000 0.00000000 0.03991692 0.27075861 0.58531690 0.98765816 1.02623746 1.03146440 1.03404002 1.03599775
0.00000000 0.00000000 0.00000000 0.03995203 0.27082819 0.58513120 0.98735341 1.02594533 1.03114434 1.03368833 1.03562091
0.00000000 0.00000000 0.00000000 0.03998492 0.27089497 0.58494412 0.98672842 1.02531686 1.03048821 1.03300231 1.03491196
0.00000000 0.00000000 0.00000000 0.04001447 0.27095802 0.58475434 0.98602923 1.02460834 1.02975190 1.03223636 1.03412334
0.00000000 0.00000000 0.00000000 0.04004090 0.27101767 0.58456293 0.98585069 1.02444246 1.02955844 1.03201122 1.03387232
0.00000000 0.00000000 0.00000000 0.04010371 0.27109087 0.58437852 0.98613289 1.02475557 1.02984305 1.03226160 1.03409348
0.00000000 0.00000000 0.00000000 0.04021038 0.27118117 0.58420341 0.98635792 1.02500694 1.03006531 1.03244973 1.03425271
0.00000000 0.00000000 0.00000000 0.04033610 0.27127812 0.58403337 0.98644763 1.02511737 1.03014775 1.03249993 1.03427613
0.00000000 0.00000000 0.00000000 0.04049176 0.27138624 0.58386993 0.98660491 1.02529794 1.03030087 1.03262130 1.03437109
0.00000000 0.00000000 0.00000000 0.04068953 0.27151032 0.58371490 0.98693771 1.02566036 1.03063526 1.03292295 1.03464509
0.00000000 0.00000000 0.00000000 0.04094724 0.27165692 0.58357135 0.98722659 1.02597526 1.03092177 1.03317707 1.03487214
0.00000000 0.00000000 0.00000000 0.04128537 0.27183400 0.58344396 0.98732044 1.02608724 1.03100796 1.03323491 1.03490751
0.00000000 0.00009010 0.00000000 0.04171443 0.27204490 0.58333647 0.98729478 1.02608059 1.03098317 1.03319036 1.03484938
0.00000000 0.00087646 0.00000000 0.04223263 0.27229064 0.58325431 0.98731902 1.02614186 1.03104227 1.03324547 1.03490645
0.00000000 0.00141059 0.00000000 0.04282832 0.27257612 0.58320443 0.98754870 1.02644083 1.03136136 1.03358169 1.03526506
0.00000000 0.00168541 0.00000000 0.04346514 0.27288449 0.58317745 0.98745402 1.02641986 1.03137923 1.03363639 1.03536204
0.00000000 0.00238819 0.00000000 0.04412872 0.27320949 0.58316837 0.98715267 1.02619982 1.03121472 1.03352577 1.03531062
0.00000000 0.00346631 0.00110048 0.04487278 0.27356615 0.58318377 0.98683194 1.02597500 1.03106155 1.03344244 1.03530206
0.00000000 0.00459965 0.00277293 0.04574477 0.27398227 0.58324330 0.98641874 1.02567640 1.03085896 1.03333447 1.03529351
0.00000000 0.00588150 0.00472189 0.04677288 0.27447545 0.58335801 0.98567110 1.02505156 1.03035663 1.03295509 1.03504230
0.00000000 0.00743607 0.00696764 0.04796477 0.27505125 0.58353146 0.98463322 1.02414583 1.02959989 1.03234941 1.03459322
0.00000000 0.00913240 0.00949771 0.04930705 0.27570507 0.58376340 0.98323324 1.02288407 1.02851394 1.03144312 1.03387245
0.00000000 0.01017700 0.01207830 0.05078200 0.27643708 0.58405642 0.98175533 1.02156469 1.02739820 1.03053515 1.03317777
0.00000000 0.01062943 0.01458271 0.05236536 0.27724163 0.58440498 0.98006635 1.02004171 1.02610097 1.02946879 1.03234769
0.00000000 0.01079055 0.01696167 0.05401540 0.27809868 0.58479277 0.97812091 1.01825978 1.02455943 1.02817385 1.03130455
0.00000000 0.01042438 0.01908512 0.05568964 0.27898635 0.58520279 0.97603459 1.01633445 1.02288354 1.02675385 1.03014506
0.00000000 0.00939751 0.02078583 0.05732726 0.27987593 0.58561439 0.97388965 1.01434747 1.02114975 1.02527925 1.02893318
0.00000000 0.00825423 0.02205170 0.05886302 0.28072987 0.58599963 0.97164916 1.01225395 1.01930589 1.02369023 1.02760128
0.00000000 0.00746241 0.02302812 0.06026866 0.28152080 0.58633779 0.96941268 1.01015498 1.01744850 1.02207789 1.02623462
0.00000000 0.00686829 0.02378080 0.06157014 0.28225239 0.58662935 0.96726331 1.00813758 1.01566424 1.02052831 1.02491862
0.00000000 0.00672610 0.02446042 0.06277741 0.28290764 0.58685480 0.96531533 1.00631321 1.01405585 1.01913503 1.02373738
0.00000000 0.00698218 0.02521887 0.06396593 0.28353497 0.58705253 0.96370272 1.00483633 1.01279118 1.01807895 1.02288508
0.00000000 0.00763883 0.02616725 0.06518681 0.28415805 0.58723877 0.96243026 1.00371645 1.01188386 1.01737807 1.02238422
0.00000000 0.00863275 0.02738974 0.06648510 0.28479793 0.58742746 0.96133175 1.00278179 1.01116459 1.01686662 1.02207322
0.00000000 0.00982212 0.02894412 0.06788877 0.28546802 0.58762822 0.96003687 1.00164496 1.01024742 1.01616204 1.02157379
0.00000000 0.01090005 0.03070938 0.06940309 0.28617515 0.58784730 0.95845608 1.00021445 1.00904359 1.01517871 1.02080366
0.00000000 0.01228908 0.03272780 0.07102209 0.28691799 0.58808457 0.95652878 0.99842756 1.00749140 1.01385610 1.01970353
0.00000000 0.01324406 0.03481869 0.07268172 0.28767074 0.58832966 0.95417667 0.99620548 1.00551410 1.01211905 1.01819968
0.00000000 0.01309323 0.03665487 0.07432534 0.28841192 0.58857190 0.95169598 0.99386213 1.00342739 1.01028298 1.01660629
0.00000000 0.01231748 0.03816207 0.07594545 0.28913972 0.58880504 0.94915648 0.99146662 1.00129691 1.00840983 1.01498147
0.00000000 0.01166077 0.03931997 0.07748105 0.28982356 0.58900715 0.94658604 0.98904571 0.99914554 1.00651797 1.01333869
0.00000000 0.01130893 0.04025079 0.07887031 0.29042310 0.58915308 0.94378242 0.98638512 0.99675530 1.00438600 1.01145319
0.00000000 0.01063420 0.04084161 0.08656611 0.29095141 0.59053305 0.94077768 0.98351903 0.99416283 1.00205400 1.00937126
0.00000000 0.01000889 0.04113839 0.09298499 0.29667274 0.59166728 0.93780934 0.98068405 0.99160905 0.99976447 1.00732601
0.00000000 0.00920049 0.04122624 0.09797165 0.30176938 0.59254639 0.93508554 0.97810903 0.98931914 0.99773863 1.00553992
0.00000000 0.00907046 0.04127286 0.10104602 0.30620339 0.59309675 0.93255982 0.97574634 0.98724205 0.99592251 1.00395911
0.00000000 0.00947674 0.04161626 0.10167652 0.30991493 0.59310664 0.93017384 0.97353256 0.98531283 0.99425074 1.00251826
0.00000000 0.00974603 0.04208586 0.10232548 0.31277202 0.59299438 0.92794850 0.97149368 0.98355996 0.99275421 1.00125070
0.00000000 0.01015822 0.04254661 0.10291282 0.31430787 0.59283553 0.92540058 0.96912339 0.98147741 0.99092844 0.99965319
0.00000000 0.00977829 0.04268000 0.10336617 0.31422243 0.59261183 0.92272506 0.96663283 0.97927950 0.98898892 0.99794192
0.00000000 0.00952593 0.04268647 0.10786437 0.31403770 0.59231717 0.91989598 0.96399002 0.97693766 0.98690529 0.99608465
0.00000000 0.00884430 0.04246573 0.11046973 0.31377655 0.59480798 0.91731570 0.96161427 0.97487520 0.98509927 0.99450139
0.00000000 0.00833537 0.04206798 0.11044921 0.31342312 0.59711226 0.91478224 0.95929219 0.97286852 0.98334781 0.99296976
0.00000000 0.00825413 0.04144893 0.11017349 0.31295019 0.59916977 0.91203084 0.95674426 0.97063801 0.98137118 0.99120984
0.00000000 0.00778926 0.04060366 0.10966046 0.31231755 0.60171661 0.90941287 0.95435164 0.96856628 0.97955141 0.98960236
0.00000000 0.00708958 0.03947619 0.10894814 0.31154366 0.60406877 0.90686653 0.95204511 0.96658535 0.97782259 0.98808378
0.00000000 0.00718064 0.03859989 0.10823004 0.31071076 0.60634159 0.90475179 0.95019841 0.96506472 0.97655149 0.98701895
0.00000000 0.00888404 0.03843832 0.10757040 0.30983557 0.60843071 0.90258548 0.94829807 0.96349046 0.97522484 0.98589578
0.00000000 0.01029843 0.03904415 0.10700833 0.30892517 0.61038021 0.90052356 0.94651839 0.96204353 0.97402940 0.98490673
0.00000000 0.01032403 0.03985052 0.10660124 0.30802707 0.61220158 0.89849408 0.94478753 0.96065799 0.97290572 0.98399926
0.00000000 0.01094879 0.04082908 0.10631346 0.30713531 0.61383517 0.89622582 0.94281549 0.95904150 0.97155960 0.98287746
0.00000000 0.01120296 0.04198053 0.10616349 0.30625339 0.61532525 0.89391756 0.94080980 0.95739840 0.97019224 0.98173928
0.00000000 0.01157327 0.04321073 0.10615404 0.30538536 0.61664830 0.89144181 0.93863209 0.95558789 0.96866096 0.98044033
0.00000000 0.01219275 0.04461230 0.10621119 0.30449339 0.61778071 0.88875423 0.93623670 0.95356324 0.96691736 0.97893019
0.00000000 0.01274463 0.04599752 0.11061290 0.30355972 0.61875440 0.88605064 0.93384446 0.95154693 0.96518351 0.97742985
0.00000000 0.01317278 0.05237131 0.11352821 0.30261780 0.61957725 0.88329584 0.93140934 0.94949305 0.96341514 0.97589725
0.00000000 0.01346983 0.05668158 0.11399316 0.30675121 0.62025025 0.88045260 0.92889548 0.94736707 0.96157862 0.97429957
0.00000000 0.01380448 0.05879482 0.11392637 0.31029036 0.62099399 0.87757727 0.92636971 0.94523572 0.95974008 0.97270202
0.00000000 0.01373645 0.05836889 0.11381689 0.31316656 0.62155703 0.87450900 0.92365941 0.94292721 0.95772822 0.97093374
0.00000000 0.01180930 0.05680457 0.11913667 0.31525951 0.62192056 0.87120558 0.92075924 0.94045566 0.95557197 0.96903736
0.00000000 0.00929220 0.05822273 0.12464427 0.31764280 0.62202398 0.86781326 0.91780898 0.93794980 0.95338728 0.96711413
0.00000000 0.01027163 0.05722213 0.12872238 0.31925474 0.62190642 0.86439474 0.91486222 0.93545363 0.95121173 0.96519622
0.00000000 0.00995289 0.05437815 0.13175059 0.32021663 0.62209455 0.86114195 0.91209160 0.93312881 0.94920044 0.96343391
0.00000000 0.00949056 0.05139494 0.13384636 0.32050658 0.62216105 0.85792397 0.90934518 0.93081927 0.94719602 0.96166977
0.00000000 0.00948326 0.04926142 0.13740301 0.31981477 0.62201963 0.85451547 0.90640359 0.92831123 0.94498752 0.95969464
0.00000000 0.00944184 0.04734325 0.13977095 0.31752994 0.62208835 0.85106439 0.90345266 0.92579470 0.94276740 0.95770290
0.00000000 0.00955679 0.04600171 0.14105748 0.31485115 0.62194496 0.84742176 0.90031753 0.92309395 0.94036052 0.95552073
0.00000000 0.00927994 0.04466171 0.14099782 0.31206874 0.62164463 0.84380725 0.89724370 0.92045700 0.93801628 0.95339851
0.00000000 0.00886667 0.04364779 0.13939689 0.30925168 0.62128189 0.84053974 0.89452919 0.91817981 0.93603013 0.95163179
0.00000000 0.00874409 0.04265221 0.13564911 0.30632031 0.62076024 0.83732376 0.89187363 0.91596322 0.93410311 0.94992135
0.00000000 0.00854468 0.04159431 0.13186279 0.30326789 0.62007598 0.83413468 0.88925468 0.91378636 0.93221562 0.94824883
0.00000000 0.00839315 0.04073900 0.12816104 0.30013438 0.61928891 0.83118061 0.88687941 0.91185320 0.93056948 0.94681418
0.00000000 0.00872880 0.04032670 0.12468435 0.29698282 0.61841588 0.82842111 0.88470042 0.91011342 0.92911318 0.94556543
0.00000000 0.00931297 0.04064156 0.12160691 0.29389480 0.61749462 0.82588173 0.88273546 0.90858080 0.92785861 0.94451353
0.00000000 0.01002593 0.04156041 0.11895954 0.29089550 0.61654277 0.82358635 0.88101044 0.90728224 0.92683388 0.94368802
0.00000000 0.01095944 0.04289751 0.11669028 0.28796945 0.61550317 0.82128184 0.87926784 0.90596009 0.92578128 0.94283124
0.00000000 0.01177969 0.04450121 0.11474307 0.28510024 0.61434701 0.81884184 0.87738083 0.90448856 0.92457585 0.94181900
0.00000000 0.01219237 0.04587600 0.11292716 0.28221828 0.61304374 0.81622085 0.87531415 0.90283801 0.92319143 0.94062797
0.00000000 0.01238696 0.04699819 0.11113365 0.27928085 0.61161368 0.81358276 0.87324483 0.90119049 0.92181323 0.93944579
0.00000000 0.01158221 0.04730554 0.10916060 0.27620090 0.61002349 0.81092864 0.87118040 0.89955589 0.92045153 0.93828218
0.00000000 0.00949496 0.04607528 0.10673112 0.27286416 0.60822862 0.80825598 0.86912703 0.89794388 0.91911705 0.93714747
0.00000000 0.00862394 0.04397526 0.10395093 0.26932443 0.60625221 0.80558105 0.86709463 0.89636102 0.91781457 0.93604541
0.00000000 0.00934535 0.04272498 0.10131697 0.26578284 0.60414464 0.80276464 0.86491133 0.89462133 0.91635055 0.93477749
0.00000000 0.01101273 0.04257651 0.09914957 0.26237921 0.60218298 0.79996468 0.86272513 0.89286793 0.91486476 0.93348177
0.00000000 0.01071392 0.04293283 0.10287791 0.25909060 0.60018767 0.79728021 0.86064843 0.89121699 0.91347708 0.93228021
0.00000000 0.01096138 0.04342910 0.10546700 0.25583296 0.59811202 0.79464231 0.85861753 0.88960926 0.91213066 0.93111841
0.00000000 0.01106714 0.04400008 0.10692449 0.25266356 0.59598681 0.79202308 0.85660491 0.88801892 0.91080219 0.92997637
0.00000000 0.01121464 0.04470868 0.10700238 0.24962105 0.59381989 0.78933321 0.85451529 0.88634915 0.90939430 0.92875685
0.00000000 0.01062856 0.04502402 0.10981930 0.24656335 0.59151251 0.78631312 0.85209869 0.88435299 0.90766002 0.92721120
0.00000000 0.00961952 0.04435206 0.11122534 0.24887811 0.59006924 0.78348462 0.84989286 0.88256799 0.90613486 0.92587113
0.00000000 0.00945552 0.04404199 0.11162839 0.25081534 0.58867232 0.78099468 0.84800460 0.88108906 0.90490841 0.92482343
0.00000000 0.00972708 0.04396251 0.11030655 0.25228787 0.58721128 0.77840231 0.84598581 0.87946617 0.90352952 0.92361645
0.00000000 0.01009864 0.04422367 0.10769008 0.25321268 0.58562547 0.77555781 0.84369036 0.87755543 0.90185530 0.92210785
0.00000000 0.01009314 0.04437081 0.11554658 0.25362931 0.58403124 0.77287105 0.84154101 0.87578153 0.90031098 0.92072272
0.00000000 0.01061144 0.04489572 0.12248516 0.25355391 0.58244955 0.77036105 0.83954660 0.87415098 0.89890324 0.91946904
0.00000000 0.01055715 0.04546734 0.12841606 0.25281306 0.58082774 0.76788518 0.83756980 0.87252940 0.89749928 0.91821513
0.00000000 0.01077533 0.04591192 0.13346849 0.25117128 0.57921750 0.76558504 0.83575589 0.87106359 0.89624684 0.91710967
0.00000000 0.01093368 0.04622482 0.13746664 0.24802684 0.57751137 0.76316164 0.83381303 0.86946569 0.89486065 0.91586971
0.00000000 0.01125150 0.04617120 0.14037541 0.24470455 0.57599418 0.76070776 0.83184238 0.86783879 0.89344337 0.91459604
0.00000000 0.01165407 0.04643782 0.14257879 0.24492258 0.57462391 0.75825508 0.82985982 0.86619236 0.89200238 0.91329606
0.00000000 0.01215244 0.04690391 0.14424499 0.24459988 0.57337209 0.75596548 0.82802655 0.86468741 0.89069959 0.91213311
0.00000000 0.01112301 0.04759914 0.14562323 0.24368144 0.57224821 0.75399483 0.82648729 0.86346567 0.88967621 0.91124896
0.00000000 0.01153605 0.04840212 0.14655373 0.24148325 0.57115204 0.75206159 0.82495687 0.86223952 0.88864218 0.91035096
0.00000000 0.01199231 0.04917641 0.14685434 0.23877826 0.57007295 0.75027260 0.82355276 0.86113057 0.88772069 0.90956267
0.00000000 0.01246079 0.04997740 0.14647135 0.23618304 0.56896690 0.74846193 0.82210637 0.85996899 0.88674111 0.90871286
0.00000000 0.01264804 0.05091029 0.14532327 0.23369813 0.56780880 0.74650946 0.82049500 0.85863122 0.88557959 0.90767756
0.00000000 0.01258379 0.05441814 0.14328899 0.23421265 0.56667836 0.74463195 0.81893822 0.85733834 0.88445779 0.90667886
0.00000000 0.01235489 0.05534144 0.13972834 0.23407167 0.56565767 0.74288102 0.81747813 0.85612824 0.88341238 0.90575329
0.00000000 0.01164285 0.05491856 0.13617572 0.23259977 0.56471888 0.74137763 0.81624341 0.85513266 0.88257661 0.90503470
0.00000000 0.01123516 0.05451986 0.13302500 0.23058182 0.56384944 0.74014857 0.81526289 0.85438087 0.88197941 0.90455118
0.00000000 0.01170028 0.05448572 0.13030396 0.22869710 0.56300673 0.73901417 0.81434785 0.85367937 0.88142411 0.90410327
0.00000000 0.01203744 0.05446314 0.12779524 0.22686986 0.56211129 0.73775249 0.81328422 0.85281770 0.88070204 0.90348370
0.00000000 0.01252174 0.05468255 0.12540825 0.22503684 0.56114115 0.73637605 0.81208989 0.85181595 0.87983386 0.90271318
0.00000000 0.01204216 0.05448324 0.12308703 0.22316631 0.56005171 0.73475061 0.81063556 0.85054767 0.87869399 0.90166587
0.00000000 0.01208405 0.05370577 0.12061848 0.22122137 0.55905380 0.73292378 0.80898109 0.84907741 0.87734996 0.90041216
0.00000000 0.01208114 0.05327149 0.11836815 0.22423237 0.55872348 0.73089307 0.80710407 0.84737466 0.87576801 0.89891706
0.00000000 0.01319262 0.05252537 0.12250094 0.22953053 0.55861679 0.72903691 0.80538638 0.84582401 0.87433412 0.89756711
0.00000000 0.01267271 0.05176979 0.12568715 0.23444761 0.55857746 0.72739141 0.80386039 0.84445719 0.87308043 0.89639532
0.00000000 0.01197670 0.05108469 0.12799218 0.23901409 0.55862137 0.72598290 0.80254962 0.84329613 0.87202794 0.89542183
0.00000000 0.01166676 0.05061309 0.12940604 0.24325420 0.55878543 0.72493025 0.80157501 0.84246187 0.87129756 0.89476713
0.00000000 0.01114004 0.05051888 0.12990732 0.24719995 0.55907267 0.72419066 0.80088878 0.84190402 0.87083763 0.89437872
0.00000000 0.01066224 0.05050459 0.12884951 0.25078674 0.55943146 0.72365713 0.80038653 0.84151884 0.87054413 0.89415209
0.00000000 0.01048867 0.04997535 0.12596258 0.25381926 0.55973346 0.72311930 0.79987140 0.84111503 0.87022787 0.89389862
0.00000000 0.01034259 0.04870579 0.12280240 0.25616968 0.55989564 0.72244729 0.79922364 0.84057724 0.86977524 0.89350557
0.00000000 0.01042042 0.04760759 0.11972072 0.25800032 0.56001689 0.72175318 0.79854525 0.84000367 0.86928401 0.89307200
0.00000000 0.01020977 0.04682758 0.11684544 0.25936290 0.56011773 0.72100222 0.79779749 0.83935448 0.86871472 0.89255987
0.00000000 0.00997750 0.04623790 0.11426726 0.26029607 0.56024336 0.72027949 0.79705810 0.83870416 0.86814010 0.89204051
0.00000000 0.00985172 0.04591486 0.11203173 0.26079978 0.56041844 0.71961863 0.79635680 0.83808048 0.86758699 0.89154019
0.00000000 0.00914207 0.04518968 0.10984937 0.26068750 0.56064748 0.71918181 0.79587236 0.83766928 0.86724446 0.89124940
0.00000000 0.00926866 0.04422417 0.10762815 0.25971859 0.56085431 0.71879260 0.79542758 0.83729231 0.86693295 0.89098708
0.00000000 0.00910520 0.04321439 0.10537650 0.25726366 0.56105401 0.71850711 0.79508142 0.83700980 0.86671352 0.89081495
0.00000000 0.00927524 0.04252770 0.10330979 0.25446793 0.56127338 0.71828874 0.79478725 0.83677096 0.86653378 0.89068041
0.00000000 0.00925490 0.04224016 0.10154172 0.25185422 0.56154040 0.71814275 0.79454461 0.83657282 0.86638996 0.89057953
0.00000000 0.00939124 0.04200688 0.09991804 0.24935894 0.56182896 0.71805817 0.79434933 0.83641413 0.86628187 0.89051251
0.00000000 0.01015442 0.04214713 0.09844737 0.24698280 0.56208840 0.71786219 0.79402427 0.83611573 0.86602911 0.89029808
0.00000000 0.01025543 0.04251032 0.09712582 0.24472759 0.56227081 0.71737388 0.79338437 0.83549141 0.86544501 0.88974961
0.00000000 0.00952018 0.04249987 0.09596817 0.24261172 0.56245083 0.71680064 0.79264158 0.83475850 0.86474923 0.88908751
0.00000000 0.01096606 0.04229916 0.10130047 0.24063930 0.56260462 0.71606858 0.79172182 0.83383906 0.86386228 0.88823180
0.00000000 0.01017264 0.05051008 0.10539379 0.23872201 0.56289561 0.71548436 0.79094797 0.83306282 0.86311697 0.88751650
0.00000000 0.00894057 0.05541205 0.10822151 0.23680046 0.56318613 0.71503111 0.79030528 0.83241685 0.86250159 0.88693104
0.00000000 0.00784700 0.05822949 0.10984985 0.23491124 0.56349576 0.71472685 0.78980613 0.83191055 0.86202396 0.88648196
0.00000000 0.00749289 0.05982468 0.11024628 0.23310944 0.56388083 0.71468400 0.78955957 0.83165139 0.86179092 0.88627603
0.00000000 0.00754134 0.06064872 0.10864321 0.23142520 0.56435304 0.71489318 0.78955317 0.83162524 0.86178762 0.88629801
0.00000000 0.00798910 0.06108043 0.10642898 0.22990280 0.56486475 0.71511882 0.78954090 0.83158124 0.86176051 0.88629263
0.00000000 0.00789571 0.06074573 0.10434079 0.22844613 0.56530015 0.71507718 0.78924234 0.83124044 0.86143057 0.88598026
0.00000000 0.00746685 0.05967516 0.10224321 0.22699433 0.56562816 0.71473216 0.78862674 0.83057489 0.86077121 0.88533502
0.00000000 0.00738355 0.06058566 0.10028707 0.22907376 0.56599448 0.71416803 0.78777719 0.82966796 0.85986529 0.88443884
0.00000000 0.00963418 0.06035863 0.09830091 0.23048635 0.56641806 0.71382423 0.78714718 0.82897803 0.85917448 0.88375593
0.00000000 0.00928589 0.05956911 0.09641579 0.23109798 0.56690759 0.71368906 0.78671892 0.82848560 0.85867932 0.88326783
0.00000000 0.00887941 0.05856632 0.09477005 0.23032928 0.56751778 0.71387603 0.78660169 0.82829788 0.85848633 0.88308088
0.00000000 0.00836692 0.05689641 0.09315372 0.22900968 0.56805728 0.71383616 0.78624279 0.82786005 0.85803820 0.88263519
0.00000000 0.00753102 0.05456738 0.09144761 0.22766444 0.56840884 0.71325930 0.78533230 0.82686252 0.85702466 0.88161950
0.00000000 0.00594212 0.05823701 0.08967347 0.22631335 0.56891741 0.71239891 0.78413200 0.82557081 0.85571295 0.88030143
0.00000000 0.00929076 0.06020070 0.08776551 0.22494162 0.57016614 0.71198217 0.78338521 0.82473554 0.85485870 0.87944105
0.00000000 0.00892168 0.06131661 0.08592112 0.22361389 0.57159758 0.71213656 0.78321218 0.82447542 0.85458130 0.87915927
0.00000000 0.00864355 0.06182078 0.08422355 0.22238851 0.57316124 0.71265517 0.78339796 0.82457159 0.85465985 0.87923418
0.00000000 0.00815268 0.06207127 0.08279277 0.22131876 0.57484949 0.71345922 0.78385474 0.82493165 0.85499931 0.87956866
0.00000000 0.00752960 0.06171784 0.08143783 0.22032489 0.57654043 0.71429077 0.78432530 0.82529778 0.85534017 0.87990099
0.00000000 0.00743268 0.06084068 0.08006130 0.21934642 0.57813121 0.71492935 0.78458795 0.82544694 0.85545747 0.88000396
0.00000000 0.00726111 0.05969835 0.07870187 0.21838914 0.57970850 0.71561060 0.78488581 0.82562605 0.85560087 0.88012966
0.00000000 0.00659070 0.05804281 0.07734068 0.21745900 0.58112429 0.71588823 0.78476568 0.82537961 0.85531405 0.87982191
0.00000000 0.00499834 0.05576206 0.07602060 0.21659652 0.58245954 0.71594225 0.78440717 0.82488796 0.85477843 0.87926341
0.00000000 0.00280014 0.05297534 0.07471730 0.21578947 0.58393706 0.71643995 0.78449040 0.82483612 0.85468151 0.87914262
0.00000000 0.00232098 0.04967743 0.07338445 0.21500525 0.58558930 0.71752275 0.78516030 0.82536883 0.85516677 0.87960100
0.00000000 0.00194724 0.04573552 0.07204695 0.21423940 0.58728431 0.71880975 0.78602525 0.82608853 0.85583222 0.88023270
0.00000000 0.00251306 0.04065962 0.07069239 0.21347145 0.58890148 0.71997685 0.78675668 0.82666378 0.85634405 0.88070201
0.00000000 0.00222903 0.03519398 0.06941912 0.21275074 0.59052958 0.72121264 0.78754753 0.82729097 0.85690221 0.88121268
0.00000000 0.00185005 0.03049525 0.06810297 0.21204420 0.59216372 0.72253489 0.78842290 0.82799884 0.85753770 0.88179760
0.00000000 0.00265876 0.02693939 0.06681302 0.21136219 0.59377090 0.72384521 0.78927979 0.82868137 0.85814223 0.88234652
0.00000000 0.00247554 0.02445241 0.06577546 0.21080899 0.59555230 0.72561724 0.79059738 0.82982166 0.85920321 0.88335143
0.00000000 0.00193908 0.02229418 0.06488755 0.21037302 0.59729053 0.72718918 0.79170221 0.83074190 0.86004045 0.88413087
0.00000000 0.00240025 0.02049302 0.06397188 0.20995505 0.59889018 0.72840323 0.79243590 0.83128155 0.86048979 0.88451622
0.00000000 0.00212379 0.01876335 0.06301939 0.20954229 0.60032788 0.72919185 0.79272937 0.83137158 0.86048234 0.88443873
0.00000000 0.00208941 0.01730515 0.06207102 0.20915285 0.60171023 0.72987188 0.79290511 0.83133694 0.86034464 0.88422619
0.00000000 0.00186801 0.01605465 0.06112575 0.20878317 0.60303697 0.73044297 0.79296342 0.83117847 0.86007795 0.88388020
0.00000000 0.00198866 0.01510124 0.06013049 0.20840438 0.60428371 0.73086415 0.79286694 0.83086030 0.85964790 0.88336713
0.00000000 0.00148315 0.01413091 0.05925484 0.20810314 0.60601497 0.73192182 0.79341260 0.83118798 0.85986479 0.88350141
0.00000000 0.00094459 0.01320913 0.05849263 0.20788957 0.60792376 0.73349584 0.79447714 0.83203283 0.86059763 0.88415080
0.00000000 0.00068835 0.01215030 0.05765493 0.20767211 0.60965477 0.73462992 0.79508824 0.83241488 0.86085973 0.88432235
0.00000000 0.00091918 0.01113011 0.05671804 0.20741661 0.61123261 0.73544324 0.79536756 0.83245600 0.86077217 0.88413585
0.00000000 0.00025581 0.01007937 0.05580692 0.20718847 0.61291951 0.73664920 0.79604039 0.83288687 0.86107020 0.88433070
0.00000000 0.00012732 0.00908820 0.05486982 0.20696464 0.61485908 0.73872507 0.79759790 0.83420252 0.86225051 0.88540414
0.00000000 0.00000000 0.00810325 0.05393721 0.20675753 0.61698998 0.74146423 0.79982877 0.83618916 0.86409767 0.88713952
0.00000000 0.00000000 0.00714440 0.05301058 0.20656931 0.61910169 0.74421138 0.80206260 0.83816986 0.86593034 0.88885223
0.00000000 0.00000000 0.00622683 0.05202282 0.20635803 0.62111371 0.74676926 0.80410047 0.83994449 0.86754677 0.89033877
0.00000000 0.00000000 0.00541607 0.05099352 0.20612723 0.62302212 0.74911878 0.80592594 0.84149914 0.86893543 0.89159010
0.00000000 0.00000000 0.00470831 0.04996428 0.20590087 0.62477362 0.75105290 0.80733049 0.84262745 0.86989300 0.89240659
0.00000000 0.00000000 0.00407997 0.04896370 0.20569850 0.62637225 0.75255369 0.80829703 0.84331482 0.87040766 0.89277941
0.00000000 0.00000000 0.00357398 0.04804122 0.20554777 0.62803040 0.75427937 0.80949582 0.84423587 0.87115698 0.89338824
0.00000000 0.00000000 0.00311920 0.04721094 0.20546056 0.62980290 0.75639490 0.81109448 0.84555887 0.87230953 0.89440180
0.00000000 0.00000000 0.00258077 0.04639917 0.20540565 0.63160246 0.75865543 0.81284365 0.84703162 0.87361042 0.89556248
0.00000000 0.00000000 0.00197270 0.04555665 0.20535198 0.63351683 0.76140467 0.81509461 0.84900617 0.87541073 0.89721945
0.00000000 0.00000000 0.00138063 0.04469577 0.20530042 0.63545709 0.76434746 0.81754645 0.85117920 0.87740561 0.89906687
0.00000000 0.00000000 0.00092763 0.04388410 0.20527803 0.63740133 0.76737375 0.82008618 0.85343740 0.87948233 0.90099306
0.00000000 0.00000000 0.00055169 0.04311652 0.20528772 0.63933997 0.77044684 0.82267981 0.85574927 0.88161178 0.90297133
0.00000000 0.00000000 0.00018415 0.04236141 0.20531627 0.64121767 0.77339052 0.82515037 0.85793864 0.88361868 0.90482743
0.00000000 0.00000000 0.00000000 0.04162503 0.20536799 0.64299334 0.77605111 0.82734165 0.85984953 0.88534780 0.90640718
0.00000000 0.00000000 0.00000000 0.04094125 0.20545719 0.64466263 0.77839030 0.82921325 0.86144153 0.88675918 0.90767129
0.00000000 0.00000000 0.00000000 0.04031970 0.20559336 0.64622320 0.78037871 0.83073501 0.86268544 0.88782487 0.90859319
0.00000000 0.00000000 0.00000000 0.03972576 0.20575904 0.64773365 0.78226057 0.83215669 0.86383248 0.88879635 0.90942399
0.00000000 0.00000000 0.00000000 0.03918016 0.20596418 0.64928491 0.78435873 0.83380738 0.86521388 0.89000617 0.91049703
0.00000000 0.00000000 0.00000000 0.03865854 0.20619784 0.65079342 0.78638031 0.83538915 0.86653002 0.89115363 0.91151092
0.00000000 0.00000000 0.00000000 0.03818489 0.20646608 0.65231303 0.78852190 0.83710328 0.86798409 0.89244330 0.91267127
0.00000000 0.00000000 0.00000000 0.03777127 0.20678113 0.65383464 0.79072652 0.83889383 0.86952200 0.89382321 0.91392842
0.00000000 0.00000000 0.00000000 0.03741448 0.20714416 0.65536956 0.79303946 0.84080674 0.87118971 0.89533923 0.91532802
0.00000000 0.00000000 0.00000000 0.03710772 0.20755241 0.65689619 0.79538312 0.84276178 0.87290558 0.89690851 0.91678614
0.00000000 0.00000000 0.00000000 0.03684437 0.20800280 0.65834630 0.79748617 0.84448015 0.87438797 0.89824758 0.91801787
0.00000000 0.00000000 0.00000000 0.03661426 0.20848803 0.65974243 0.79945647 0.84607011 0.87574443 0.89946283 0.91912820
0.00000000 0.00000000 0.00000000 0.03641753 0.20900750 0.66118678 0.80172967 0.84797535 0.87742025 0.90099977 0.92056205
0.00000000 0.00000000 0.00000000 0.03623594 0.20955454 0.66262756 0.80410832 0.84999221 0.87920841 0.90264869 0.92210730
0.00000000 0.00000000 0.00000000 0.03604005 0.21010810 0.66404800 0.80657721 0.85210261 0.88108745 0.90438455 0.92373513
0.00000000 0.00000000 0.00000000 0.03583525 0.21065900 0.66546188 0.80922915 0.85440047 0.88315042 0.90629906 0.92553569
0.00000000 0.00000000 0.00000000 0.03563924 0.21121758 0.66673644 0.81144030 0.85625001 0.88475972 0.90775503 0.92687349
0.00000000 0.00000000 0.00000000 0.03545234 0.21178625 0.66786434 0.81316149 0.85760077 0.88586550 0.90870343 0.92770048
0.00000000 0.00000000 0.00000000 0.03527361 0.21236304 0.66900506 0.81515038 0.85922593 0.88724482 0.90992263 0.92879490
0.00000000 0.00000000 0.00000000 0.03510257 0.21295210 0.67006596 0.81695824 0.86066704 0.88843668 0.91095079 0.92969493
0.00000000 0.00000000 0.00000000 0.03491692 0.21353904 0.67104617 0.81862209 0.86195923 0.88947389 0.91181805 0.93042789
0.00000000 0.00000000 0.00000000 0.03471365 0.21411400 0.67196255 0.82025888 0.86322077 0.89047388 0.91264046 0.93110822
0.00000000 0.00000000 0.00000000 0.03450801 0.21468155 0.67282873 0.82193312 0.86451936 0.89150620 0.91348926 0.93180871
0.00000000 0.00000000 0.00000000 0.03431577 0.21525397 0.67376849 0.82428793 0.86651497 0.89323650 0.91503366 0.93320102
0.00000000 0.00000000 0.00000000 0.03413507 0.21583772 0.67462462 0.82647643 0.86834387 0.89479747 0.91640575 0.93441835
0.00000000 0.00000000 0.00000000 0.03394051 0.21641796 0.67545945 0.82891405 0.87042730 0.89660902 0.91802257 0.93587391
0.00000000 0.00000000 0.00000000 0.03372908 0.21698530 0.67622471 0.83138204 0.87254035 0.89844302 0.91965337 0.93733479
0.00000000 0.00000000 0.00000000 0.03350862 0.21754070 0.67683665 0.83338121 0.87417420 0.89978946 0.92078863 0.93829292
0.00000000 0.00000000 0.00000000 0.03328979 0.21808917 0.67732354 0.83505874 0.87548130 0.90080427 0.92158727 0.93891000
0.00000000 0.00000000 0.00000000 0.03308204 0.21863571 0.67766590 0.83625784 0.87630332 0.90133099 0.92189523 0.93903470
0.00000000 0.00000000 0.00000000 0.03290217 0.21919537 0.67786639 0.83691255 0.87657430 0.90130655 0.92165287 0.93861106
0.00000000 0.00000000 0.00000000 0.03273932 0.22359775 0.67808285 0.83814132 0.87743477 0.90187456 0.92200344 0.93878002
0.00000000 0.00000000 0.00000000 0.03258643 0.22696011 0.67834110 0.84026688 0.87921427 0.90336120 0.92326879 0.93985799
0.00000000 0.00000000 0.00000000 0.03242879 0.22832877 0.67847244 0.84215783 0.88075593 0.90460510 0.92428586 0.94068252
0.00000000 0.00000000 0.00000000 0.03227629 0.22880795 0.67851912 0.84427018 0.88252830 0.90607793 0.92552822 0.94172814
0.00000000 0.00000000 0.00000000 0.03213689 0.22928885 0.67838395 0.84574785 0.88366036 0.90691095 0.92613161 0.94213693
0.00000000 0.00000000 0.00000000 0.03202414 0.22978122 0.67812718 0.84718339 0.88475842 0.90771353 0.92670713 0.94252049
0.00000000 0.00000000 0.00000000 0.03192231 0.23028143 0.67767906 0.84791852 0.88514829 0.90780958 0.92657856 0.94220380
0.00000000 0.00000000 0.00000000 0.03182358 0.23078128 0.67782879 0.84867670 0.88556437 0.90793112 0.92647518 0.94191112
0.00000000 0.00000000 0.00000000 0.03172838 0.23128218 0.67791714 0.84972452 0.88627833 0.90835077 0.92666799 0.94191207
0.00000000 0.00000000 0.00000000 0.03163196 0.23178003 0.67796271 0.85139816 0.88763476 0.90941237 0.92749861 0.94254595
0.00000000 0.00000000 0.00000000 0.03153676 0.23227476 0.67791390 0.85344294 0.88937563 0.91085816 0.92871047 0.94355762
0.00000000 0.00000000 0.00000000 0.03144496 0.23276657 0.67770036 0.85535987 0.89099169 0.91217851 0.92979548 0.94444109
0.00000000 0.00000000 0.00000000 0.03135983 0.23325760 0.67730160 0.85718071 0.89251714 0.91340928 0.93079102 0.94523522
0.00000000 0.00000000 0.00000000 0.03128064 0.23374680 0.67667175 0.85890884 0.89395546 0.91455381 0.93170029 0.94594306
0.00000000 0.00000000 0.00000000 0.03120621 0.23423252 0.67566653 0.86113495 0.89591193 0.91621793 0.93312735 0.94716625
0.00000000 0.00000000 0.00000000 0.03113863 0.23471469 0.67427351 0.86304143 0.89755305 0.91756824 0.93424206 0.94807877
0.00000000 0.00000000 0.00000000 0.03107734 0.23519260 0.67289999 0.86484046 0.89909519 0.91882129 0.93526033 0.94889568
0.00000000 0.00000000 0.00000000 0.03102195 0.23566619 0.67154533 0.86657640 0.90058307 0.92002180 0.93622672 0.94966129
0.00000000 0.00000000 0.00000000 0.03097209 0.23613548 0.67020934 0.86838822 0.90215869 0.92131206 0.93728322 0.95051719
0.00000000 0.00000000 0.00000000 0.03092823 0.23660088 0.66889217 0.87010332 0.90364569 0.92251598 0.93825476 0.95128944
0.00000000 0.00000000 0.00000000 0.03089122 0.23706320 0.66759379 0.87160081 0.90492028 0.92351034 0.93901910 0.95185695
0.00000000 0.00000000 0.00000000 0.03086016 0.23752177 0.66631313 0.87314188 0.90624879 0.92456132 0.93984128 0.95248331
0.00000000 0.00000000 0.00000000 0.03083585 0.23797733 0.66505143 0.87514459 0.90805992 0.92609843 0.94114991 0.95359576
0.00000000 0.00000000 0.00000000 0.03081815 0.23842987 0.66380981 0.87752477 0.91026869 0.92803673 0.94286046 0.95511021
0.00000000 0.00000000 0.00000000 0.03080688 0.23887923 0.66258875 0.88003216 0.91261961 0.93012067 0.94471824 0.95677313
0.00000000 0.00000000 0.00000000 0.03080283 0.23932624 0.66138836 0.88221397 0.91464928 0.93188704 0.94626206 0.95812586
0.00000000 0.00000000 0.00000000 0.03080445 0.23976996 0.66020646 0.88404235 0.91632713 0.93330464 0.94746024 0.95913628
0.00000000 0.00000000 0.00000000 0.03081291 0.24021174 0.65904353 0.88587207 0.91801654 0.93473807 0.94867715 0.96016814
0.00000000 0.00000000 0.00000000 0.03082631 0.24065020 0.65789712 0.88723529 0.91923618 0.93570436 0.94943020 0.96073970
0.00000000 0.00000000 0.00000000 0.03084405 0.24108587 0.65676712 0.88872525 0.92059334 0.93681174 0.95032614 0.96145557
0.00000000 0.00000000 0.00000000 0.03086563 0.24151782 0.65565395 0.89083680 0.92259543 0.93856768 0.95187046 0.96281869
0.00000000 0.00000000 0.00000000 0.03089328 0.24194722 0.65455795 0.89198152 0.92361676 0.93934698 0.95244489 0.96321953
0.00000000 0.00000000 0.00000000 0.03092757 0.24237472 0.65347758 0.89304975 0.92456678 0.94005912 0.95295543 0.96355960
0.00000000 0.00000000 0.00000000 0.03097088 0.24280306 0.65241606 0.89471818 0.92614123 0.94140207 0.95409947 0.96453486
0.00000000 0.00000000 0.00000000 0.03100937 0.24362134 0.65012849 0.89725906 0.92886073 0.94386848 0.95631245 0.96652736
0.00000000 0.00000000 0.00000000 0.03104786 0.24443962 0.64784091 0.89979994 0.93158022 0.94633489 0.95852543 0.96851987
0.00000000 0.00000000 0.00000000 0.03108636 0.24525790 0.64555334 0.90234083 0.93429972 0.94880130 0.96073840 0.97051238
0.00000000 0.00000000 0.00000000 0.03112485 0.24607618 0.64326576 0.90488171 0.93701921 0.95126772 0.96295138 0.97250488
0.00000000 0.00000000 0.00000000 0.03116334 0.24689446 0.64097819 0.90742259 0.93973871 0.95373413 0.96516436 0.97449739
0.00000000 0.00000000 0.00000000 0.03120183 0.24771274 0.63869061 0.90996347 0.94245820 0.95620054 0.96737733 0.97648989
0.00000000 0.00000000 0.00000000 0.03124032 0.24853103 0.63640303 0.91250435 0.94517770 0.95866695 0.96959031 0.97848240
0.00000000 0.00000000 0.00000000 0.03127882 0.24934931 0.63411546 0.91504523 0.94789719 0.96113336 0.97180329 0.98047490
0.00000000 0.00000000 0.00000000 0.03131731 0.25016759 0.63182788 0.91758611 0.95061669 0.96359977 0.97401626 0.98246741
0.00000000 0.00000000 0.00000000 0.03135580 0.25098587 0.62954031 0.92012699 0.95333618 0.96606618 0.97622924 0.98445992
0.00000000 0.00000000 0.00000000 0.03139429 0.25180415 0.62725273 0.92266787 0.95605568 0.96853259 0.97844222 0.98645242
0.00000000 0.00000000 0.00000000 0.03143279 0.25262243 0.62496516 0.92520875 0.95877517 0.97099900 0.98065519 0.98844493
0.00000000 0.00000000 0.00000000 0.03147128 0.25344071 0.62267758 0.92774963 0.96149466 0.97346541 0.98286817 0.99043743
0.00000000 0.00000000 0.00000000 0.03150977 0.25425900 0.62039001 0.93029051 0.96421416 0.97593182 0.98508115 0.99242994
0.00000000 0.00000000 0.00000000 0.03154826 0.25507728 0.61810243 0.93283139 0.96693365 0.97839823 0.98729412 0.99442244
0.00000000 0.00000000 0.00000000 0.03158676 0.25589556 0.61581485 0.93537227 0.96965315 0.98086464 0.98950710 0.99641495
0.00000000 0.00000000 0.00000000 0.03162525 0.25671384 0.61352728 0.93791315 0.97237264 0.98333105 0.99172008 0.99840746
0.00000000 0.00000000 0.00000000 0.03166374 0.25753212 0.61123970 0.94045403 0.97509214 0.98579746 0.99393305 1.00039996
0.00000000 0.00000000 0.00000000 0.03170223 0.25835040 0.60895213 0.94299492 0.97781163 0.98826387 0.99614603 1.00239247
0.00000000 0.00000000 0.00000000 0.03174072 0.25916868 0.60666455 0.94553580 0.98053113 0.99073028 0.99835901 1.00438497
0.00000000 0.00000000 0.00000000 0.03195075 0.25943600 0.60621904 0.94717646 0.98219768 0.99225968 0.99976383 1.00568873
0.00000000 0.00000000 0.00000000 0.03215739 0.25969959 0.60578135 0.94840079 0.98344045 0.99336935 1.00075319 1.00658149
0.00000000 0.00000000 0.00000000 0.03235689 0.25995504 0.60534671 0.94968187 0.98474280 0.99453859 1.00180108 1.00753119
0.00000000 0.00000000 0.00000000 0.03255838 0.26021318 0.60492407 0.95027472 0.98534448 0.99501626 1.00216765 1.00781034
0.00000000 0.00000000 0.00000000 0.03275753 0.26046852 0.60450674 0.95065411 0.98572874 0.99528048 1.00232456 1.00788348
0.00000000 0.00000000 0.00000000 0.03295124 0.26071762 0.60409193 0.95152203 0.98661718 0.99604927 1.00298423 1.00845638
0.00000000 0.00000000 0.00000000 0.03313659 0.26095712 0.60367736 0.95246598 0.98758232 0.99689308 1.00371627 1.00909847
0.00000000 0.00000000 0.00000000 0.03331944 0.26119387 0.60326881 0.95302832 0.98815715 0.99735064 1.00406656 1.00936345
0.00000000 0.00000000 0.00000000 0.03350025 0.26142811 0.60286512 0.95321904 0.98835078 0.99743095 1.00404403 1.00926018
0.00000000 0.00000000 0.00000000 0.03367882 0.26165971 0.60246609 0.95373443 0.98888160 0.99785141 1.00436293 1.00949870
0.00000000 0.00000000 0.00000000 0.03385201 0.26188905 0.60207240 0.95427779 0.98944378 0.99830646 1.00471895 1.00977639
0.00000000 0.00000000 0.00000000 0.03402244 0.26211566 0.60168361 0.95469336 0.98987636 0.99863527 1.00495186 1.00993388
0.00000000 0.00000000 0.00000000 0.03418588 0.26233458 0.60129464 0.95503691 0.99023223 0.99888652 1.00510606 1.01001127
0.00000000 0.00000000 0.00000000 0.03434318 0.26254627 0.60090553 0.95523436 0.99043500 0.99898426 1.00510633 1.00993413
0.00000000 0.00000000 0.00000000 0.03449840 0.26275544 0.60051986 0.95508155 0.99027716 0.99872500 1.00475379 1.00950856
0.00000000 0.00000000 0.00000000 0.03465169 0.26296215 0.60013689 0.95482740 0.99001515 0.99836471 1.00430326 1.00898779
0.00000000 0.00000000 0.00000000 0.03480274 0.26316600 0.59975675 0.95502423 0.99021967 0.99847294 1.00432135 1.00893465
0.00000000 0.00000000 0.00000000 0.03494780 0.26336268 0.59937658 0.95551816 0.99072918 0.99888494 1.00464060 1.00917924
0.00000000 0.00000000 0.00000000 0.03508681 0.26355221 0.59899586 0.95539558 0.99059918 0.99865743 1.00432194 1.00878820
0.00000000 0.00000000 0.00000000 0.03522396 0.26373937 0.59861917 0.95602061 0.99124373 0.99920636 1.00477875 1.00917009
0.00000000 0.00000000 0.00000000 0.03535943 0.26392422 0.59824855 0.95720156 0.99246650 1.00033570 1.00581582 1.01013089
0.00000000 0.00000000 0.00000000 0.03549320 0.26410678 0.59788442 0.95814685 0.99344942 1.00122821 1.00661937 1.01086154
0.00000000 0.00000000 0.00000000 0.03562498 0.26428687 0.59752646 0.95921449 0.99456243 1.00225339 1.00755726 1.01172766
0.00000000 0.00000000 0.00000000 0.03575515 0.26446476 0.59717512 0.96040026 0.99580134 1.00340697 1.00862517 1.01272493
0.00000000 0.00000000 0.00000000 0.03588374 0.26464048 0.59683071 0.96170132 0.99716344 1.00468618 1.00982027 1.01385045
0.00000000 0.00000000 0.00000000 0.03601035 0.26481411 0.59649354 0.96311100 0.99864200 1.00608425 1.01113578 1.01509743
0.00000000 0.00000000 0.00000000 0.03613190 0.26498592 0.59616371 0.96445241 1.00005383 1.00741808 1.01238927 1.01628445
0.00000000 0.00000000 0.00000000 0.03624493 0.26514754 0.59583376 0.96607024 1.00174866 1.00903025 1.01391512 1.01773716
0.00000000 0.00000000 0.00000000 0.03635509 0.26530567 0.59551037 0.96768126 1.00343976 1.01064003 1.01543948 1.01918902
0.00000000 0.00000000 0.00000000 0.03646985 0.26546885 0.59520112 0.96906140 1.00490228 1.01202986 1.01675275 1.02043870
0.00000000 0.00000000 0.00000000 0.03658344 0.26563013 0.59489878 0.97036996 1.00629403 1.01335123 1.01799965 1.02162394
0.00000000 0.00000000 0.00000000 0.03669126 0.26578440 0.59459891 0.97196490 1.00798157 1.01496619 1.01953658 1.02309491
0.00000000 0.00000000 0.00000000 0.03679568 0.26593454 0.59430440 0.97346078 1.00956832 1.01648085 1.02097360 1.02446632
0.00000000 0.00000000 0.00000000 0.03689878 0.26608282 0.59401709 0.97492518 1.01112598 1.01796868 1.02238573 1.02581455
0.00000000 0.00000000 0.00000000 0.03700066 0.26622931 0.59373683 0.97636338 1.01265985 1.01943489 1.02377809 1.02714467
0.00000000 0.00000000 0.00000000 0.03710135 0.26637404 0.59346315 0.97756399 1.01395028 1.02065995 1.02493205 1.02823926
0.00000000 0.00000000 0.00000000 0.03720088 0.26651690 0.59319481 0.97840609 1.01487058 1.02151686 1.02572078 1.02897191
0.00000000 0.00000000 0.00000000 0.03729402 0.26665287 0.59292694 0.97947290 1.01602107 1.02260148 1.02673364 1.02992452
0.00000000 0.00000000 0.00000000 0.03738108 0.26678345 0.59266149 0.98071172 1.01734897 1.02386225 1.02792048 1.03104846
0.00000000 0.00000000 0.00000000 0.03748431 0.26693365 0.59242203 0.98187933 1.01862432 1.02509020 1.02909390 1.03217808
0.00000000 0.00000000 0.00000000 0.03758534 0.26708071 0.59218670 0.98293454 1.01978313 1.02620189 1.03015142 1.03319213
0.00000000 0.00000000 0.00000000 0.03768280 0.26722387 0.59195444 0.98384183 1.02078763 1.02715906 1.03105451 1.03405180
0.00000000 0.00000000 0.00000000 0.03777708 0.26736329 0.59172491 0.98460834 1.02164502 1.02796903 1.03181060 1.03476469
0.00000000 0.00000000 0.00000000 0.03786802 0.26749879 0.59149743 0.98523547 1.02235618 1.02863249 1.03242020 1.03533111
0.00000000 0.00000000 0.00000000 0.03795576 0.26763060 0.59127171 0.98572974 1.02292772 1.02915623 1.03289027 1.03575821
0.00000000 0.00000000 0.00000000 0.03804041 0.26775878 0.59104739 0.98609207 1.02336035 1.02954098 1.03322164 1.03604688
0.00000000 0.00000000 0.00000000 0.03812237 0.26788355 0.59082419 0.98632459 1.02365615 1.02978898 1.03341671 1.03619969
0.00000000 0.00000000 0.00000000 0.03820095 0.26800453 0.59060076 0.98608808 1.02346154 1.02954655 1.03312299 1.03586600
0.00000000 0.00000000 0.00000000 0.03827734 0.26812254 0.59037664 0.98555006 1.02295042 1.02898816 1.03251501 1.03522004
0.00000000 0.00000000 0.00000000 0.03835137 0.26823752 0.59015071 0.98466020 1.02206963 1.02806061 1.03153974 1.03420907
0.00000000 0.00000000 0.00000000 0.03842361 0.26835024 0.58992404 0.98434591 1.02178421 1.02772875 1.03115826 1.03378874
0.00000000 0.00000000 0.00000000 0.03849450 0.26846115 0.58969873 0.98452643 1.02201213 1.02791101 1.03128970 1.03387905
0.00000000 0.00000000 0.00000000 0.03857671 0.26858467 0.58948918 0.98479199 1.02234077 1.02820688 1.03154704 1.03410709
0.00000000 0.00000000 0.00000000 0.03865874 0.26870747 0.58928404 0.98578054 1.02342265 1.02925728 1.03255722 1.03508474
0.00000000 0.00000000 0.00000000 0.03873939 0.26882850 0.58908393 0.98705756 1.02480621 1.03061004 1.03386912 1.03636276
0.00000000 0.00000000 0.00000000 0.03881841 0.26894758 0.58888866 0.98808661 1.02593293 1.03170653 1.03492611 1.03738748
0.00000000 0.00000000 0.00000000 0.03889528 0.26906428 0.58869661 0.98862143 1.02654514 1.03228878 1.03547101 1.03790297
0.00000000 0.00000000 0.00000000 0.03896998 0.26917861 0.58850657 0.98889588 1.02688525 1.03259919 1.03574526 1.03814930
0.00000000 0.00000000 0.00000000 0.03904254 0.26929059 0.58831824 0.98926306 1.02732075 1.03300510 1.03611470 1.03849012
0.00000000 0.00000000 0.00000000 0.03911298 0.26940024 0.58813127 0.98933311 1.02744537 1.03310036 1.03617489 1.03852346
0.00000000 0.00000000 0.00000000 0.03918132 0.26950756 0.58794466 0.98907215 1.02722308 1.03284895 1.03589001 1.03821375
0.00000000 0.00000000 0.00000000 0.03924759 0.26961255 0.58775805 0.98892137 1.02711325 1.03271008 1.03571732 1.03801548
0.00000000 0.00000000 0.00000000 0.03931178 0.26971522 0.58757119 0.98852236 1.02674234 1.03231034 1.03528501 1.03755914
0.00000000 0.00000000 0.00000000 0.03937391 0.26981557 0.58738356 0.98804852 1.02629073 1.03183002 1.03477262 1.03702316
0.00000000 0.00000000 0.00000000 0.03943399 0.26991357 0.58719528 0.98772341 1.02599160 1.03150220 1.03441222 1.03663820
0.00000000 0.00000000 0.00000000 0.03949201 0.27000923 0.58700640 0.98730594 1.02559380 1.03107585 1.03395383 1.03615582
0.00000000 0.00000000 0.00000000 0.03954798 0.27010252 0.58681643 0.98667903 1.02497496 1.03042860 1.03327567 1.03545501
0.00000000 0.00000000 0.00000000 0.03960186 0.27019342 0.58662556 0.98639839 1.02471484 1.03014001 1.03295473 1.03510917
0.00000000 0.00000000 0.00000000 0.03965362 0.27028189 0.58643496 0.98652166 1.02487463 1.03027129 1.03305194 1.03517885
0.00000000 0.00000000 0.00000000 0.03970325 0.27036789 0.58624586 0.98706076 1.02546790 1.03083605 1.03358083 1.03567748
0.00000000 0.00000000 0.00000000 0.03975068 0.27045137 0.58605852 0.98737730 1.02582884 1.03116858 1.03387850 1.03594623
0.00000000 0.00000000 0.00000000 0.03979586 0.27053227 0.58587242 0.98764572 1.02613915 1.03145054 1.03412588 1.03616492
0.00000000 0.00000000 0.00000000 0.03983870 0.27061052 0.58568719 0.98776814 1.02629646 1.03157960 1.03422108 1.03623229
0.00000000 0.00000000 0.00000000 0.03987909 0.27068600 0.58550210 0.98763579 1.02618673 1.03144174 1.03405059 1.03603558
0.00000000 0.00000000 0.00000000 0.03991692 0.27075861 0.58531690 0.98765816 1.02623746 1.03146440 1.03404002 1.03599775
0.00000000 0.00000000 0.00000000 0.03995203 0.27082819 0.58513120 0.98735341 1.02594533 1.03114434 1.03368833 1.03562091
0.00000000 0.00000000 0.00000000 0.03998492 0.27089497 0.58494412 0.98672842 1.02531686 1.03048821 1.03300231 1.03491196
0.00000000 0.00000000 0.00000000 0.04001447 0.27095802 0.58475434 0.98602923 1.02460834 1.02975190 1.03223636 1.03412334
0.00000000 0.00000000 0.00000000 0.04004090 0.27101767 0.58456293 0.98585069 1.02444246 1.02955844 1.03201122 1.03387232
0.00000000 0.00000000 0.00000000 0.04010371 0.27109087 0.58437852 0.98613289 1.02475557 1.02984305 1.03226160 1.03409348
0.00000000 0.00000000 0.00000000 0.04021038 0.27118117 0.58420341 0.98635792 1.02500694 1.03006531 1.03244973 1.03425271
0.00000000 0.00000000 0.00000000 0.04033610 0.27127812 0.58403337 0.98644763 1.02511737 1.03014775 1.03249993 1.03427613
0.00000000 0.00000000 0.00000000 0.04049176 0.27138624 0.58386993 0.98660491 1.02529794 1.03030087 1.03262130 1.03437109
0.00000000 0.00000000 0.00000000 0.04068953 0.27151032 0.58371490 0.98693771 1.02566036 1.03063526 1.03292295 1.03464509
0.00000000 0.00000000 0.00000000 0.04094724 0.27165692 0.58357135 0.98722659 1.02597526 1.03092177 1.03317707 1.03487214
0.00000000 0.00000000 0.00000000 0.04128537 0.27183400 0.58344396 0.98732044 1.02608724 1.03100796 1.03323491 1.03490751
0.00000000 0.00009010 0.00000000 0.04171443 0.27204490 0.58333647 0.98729478 1.02608059 1.03098317 1.03319036 1.03484938
0.00000000 0.00087646 0.00000000 0.04223263 0.27229064 0.58325431 0.98731902 1.02614186 1.03104227 1.03324547 1.03490645
0.00000000 0.00141059 0.00000000 0.04282832 0.27257612 0.58320443 0.98754870 1.02644083 1.03136136 1.03358169 1.03526506
0.00000000 0.00168541 0.00000000 0.04346514 0.27288449 0.58317745 0.98745402 1.02641986 1.03137923 1.03363639 1.03536204
0.00000000 0.00238819 0.00000000 0.04412872 0.27320949 0.58316837 0.98715267 1.02619982 1.03121472 1.03352577 1.03531062
0.00000000 0.00346631 0.00110048 0.04487278 0.27356615 0.58318377 0.98683194 1.02597500 1.03106155 1.03344244 1.03530206
0.00000000 0.00459965 0.00277293 0.04574477 0.27398227 0.58324330 0.98641874 1.02567640 1.03085896 1.03333447 1.03529351
0.00000000 0.00588150 0.00472189 0.04677288 0.27447545 0.58335801 0.98567110 1.02505156 1.03035663 1.03295509 1.03504230
0.00000000 0.00743607 0.00696764 0.04796477 0.27505125 0.58353146 0.98463322 1.02414583 1.02959989 1.03234941 1.03459322
0.00000000 0.00913240 0.00949771 0.04930705 0.27570507 0.58376340 0.98323324 1.02288407 1.02851394 1.03144312 1.03387245
0.00000000 0.01017700 0.01207830 0.05078200 0.27643708 0.58405642 0.98175533 1.02156469 1.02739820 1.03053515 1.03317777
0.00000000 0.01062943 0.01458271 0.05236536 0.27724163 0.58440498 0.98006635 1.02004171 1.02610097 1.02946879 1.03234769
0.00000000 0.01079055 0.01696167 0.05401540 0.27809868 0.58479277 0.97812091 1.01825978 1.02455943 1.02817385 1.03130455
0.00000000 0.01042438 0.01908512 0.05568964 0.27898635 0.58520279 0.97603459 1.01633445 1.02288354 1.02675385 1.03014506
0.00000000 0.00939751 0.02078583 0.05732726 0.27987593 0.58561439 0.97388965 1.01434747 1.02114975 1.02527925 1.02893318
0.00000000 0.00825423 0.02205170 0.05886302 0.28072987 0.58599963 0.97164916 1.01225395 1.01930589 1.02369023 1.02760128
0.00000000 0.00746241 0.02302812 0.06026866 0.28152080 0.58633779 0.96941268 1.01015498 1.01744850 1.02207789 1.02623462
0.00000000 0.00686829 0.02378080 0.06157014 0.28225239 0.58662935 0.96726331 1.00813758 1.01566424 1.02052831 1.02491862
0.00000000 0.00672610 0.02446042 0.06277741 0.28290764 0.58685480 0.96531533 1.00631321 1.01405585 1.01913503 1.02373738
0.00000000 0.00698218 0.02521887 0.06396593 0.28353497 0.58705253 0.96370272 1.00483633 1.01279118 1.01807895 1.02288508
0.00000000 0.00763883 0.02616725 0.06518681 0.28415805 0.58723877 0.96243026 1.00371645 1.01188386 1.01737807 1.02238422
0.00000000 0.00863275 0.02738974 0.06648510 0.28479793 0.58742746 0.96133175 1.00278179 1.01116459 1.01686662 1.02207322
0.00000000 0.00982212 0.02894412 0.06788877 0.28546802 0.58762822 0.96003687 1.00164496 1.01024742 1.01616204 1.02157379
0.00000000 0.01090005 0.03070938 0.06940309 0.28617515 0.58784730 0.95845608 1.00021445 1.00904359 1.01517871 1.02080366
0.00000000 0.01228908 0.03272780 0.07102209 0.28691799 0.58808457 0.95652878 0.99842756 1.00749140 1.01385610 1.01970353
0.00000000 0.01324406 0.03481869 0.07268172 0.28767074 0.58832966 0.95417667 0.99620548 1.00551410 1.01211905 1.01819968
0.00000000 0.01309323 0.03665487 0.07432534 0.28841192 0.58857190 0.95169598 0.99386213 1.00342739 1.01028298 1.01660629
0.00000000 0.01231748 0.03816207 0.07594545 0.28913972 0.58880504 0.94915648 0.99146662 1.00129691 1.00840983 1.01498147
0.00000000 0.01166077 0.03931997 0.07748105 0.28982356 0.58900715 0.94658604 0.98904571 0.99914554 1.00651797 1.01333869
0.00000000 0.01130893 0.04025079 0.07887031 0.29042310 0.58915308 0.94378242 0.98638512 0.99675530 1.00438600 1.01145319
0.00000000 0.01063420 0.04084161 0.08656611 0.29095141 0.59053305 0.94077768 0.98351903 0.99416283 1.00205400 1.00937126
0.00000000 0.01000889 0.04113839 0.09298499 0.29667274 0.59166728 0.93780934 0.98068405 0.99160905 0.99976447 1.00732601
0.00000000 0.00920049 0.04122624 0.09797165 0.30176938 0.59254639 0.93508554 0.97810903 0.98931914 0.99773863 1.00553992
0.00000000 0.00907046 0.04127286 0.10104602 0.30620339 0.59309675 0.93255982 0.97574634 0.98724205 0.99592251 1.00395911
0.00000000 0.00947674 0.04161626 0.10167652 0.30991493 0.59310664 0.93017384 0.97353256 0.98531283 0.99425074 1.00251826
0.00000000 0.00974603 0.04208586 0.10232548 0.31277202 0.59299438 0.92794850 0.97149368 0.98355996 0.99275421 1.00125070
0.00000000 0.01015822 0.04254661 0.10291282 0.31430787 0.59283553 0.92540058 0.96912339 0.98147741 0.99092844 0.99965319
0.00000000 0.00977829 0.04268000 0.10336617 0.31422243 0.59261183 0.92272506 0.96663283 0.97927950 0.98898892 0.99794192
0.00000000 0.00952593 0.04268647 0.10786437 0.31403770 0.59231717 0.91989598 0.96399002 0.97693766 0.98690529 0.99608465
0.00000000 0.00884430 0.04246573 0.11046973 0.31377655 0.59480798 0.91731570 0.96161427 0.97487520 0.98509927 0.99450139
0.00000000 0.00833537 0.04206798 0.11044921 0.31342312 0.59711226 0.91478224 0.95929219 0.97286852 0.98334781 0.99296976
0.00000000 0.00825413 0.04144893 0.11017349 0.31295019 0.59916977 0.91203084 0.95674426 0.97063801 0.98137118 0.99120984
0.00000000 0.00778926 0.04060366 0.10966046 0.31231755 0.60171661 0.90941287 0.95435164 0.96856628 0.97955141 0.98960236
0.00000000 0.00708958 0.03947619 0.10894814 0.31154366 0.60406877 0.90686653 0.95204511 0.96658535 0.97782259 0.98808378
0.00000000 0.00718064 0.03859989 0.10823004 0.31071076 0.60634159 0.90475179 0.95019841 0.96506472 0.97655149 0.98701895
0.00000000 0.00888404 0.03843832 0.10757040 0.30983557 0.60843071 0.90258548 0.94829807 0.96349046 0.97522484 0.98589578
0.00000000 0.01029843 0.03904415 0.10700833 0.30892517 0.61038021 0.90052356 0.94651839 0.96204353 0.97402940 0.98490673
0.00000000 0.01032403 0.03985052 0.10660124 0.30802707 0.61220158 0.89849408 0.94478753 0.96065799 0.97290572 0.98399926
0.00000000 0.01094879 0.04082908 0.10631346 0.30713531 0.61383517 0.89622582 0.94281549 0.95904150 0.97155960 0.98287746
0.00000000 0.01120296 0.04198053 0.10616349 0.30625339 0.61532525 0.89391756 0.94080980 0.95739840 0.97019224 0.98173928
0.00000000 0.01157327 0.04321073 0.10615404 0.30538536 0.61664830 0.89144181 0.93863209 0.95558789 0.96866096 0.98044033
0.00000000 0.01219275 0.04461230 0.10621119 0.30449339 0.61778071 0.88875423 0.93623670 0.95356324 0.96691736 0.97893019
0.00000000 0.01274463 0.04599752 0.11061290 0.30355972 0.61875440 0.88605064 0.93384446 0.95154693 0.96518351 0.97742985
0.00000000 0.01317278 0.05237131 0.11352821 0.30261780 0.61957725 0.88329584 0.93140934 0.94949305 0.96341514 0.97589725
0.00000000 0.01346983 0.05668158 0.11399316 0.30675121 0.62025025 0.88045260 0.92889548 0.94736707 0.96157862 0.97429957
0.00000000 0.01380448 0.05879482 0.11392637 0.31029036 0.62099399 0.87757727 0.92636971 0.94523572 0.95974008 0.97270202
0.00000000 0.01373645 0.05836889 0.11381689 0.31316656 0.62155703 0.87450900 0.92365941 0.94292721 0.95772822 0.97093374
0.00000000 0.01180930 0.05680457 0.11913667 0.31525951 0.62192056 0.87120558 0.92075924 0.94045566 0.95557197 0.96903736
0.00000000 0.00929220 0.05822273 0.12464427 0.31764280 0.62202398 0.86781326 0.91780898 0.93794980 0.95338728 0.96711413
0.00000000 0.01027163 0.05722213 0.12872238 0.31925474 0.62190642 0.86439474 0.91486222 0.93545363 0.95121173 0.96519622
0.00000000 0.00995289 0.05437815 0.13175059 0.32021663 0.62209455 0.86114195 0.91209160 0.93312881 0.94920044 0.96343391
0.00000000 0.00949056 0.05139494 0.13384636 0.32050658 0.62216105 0.85792397 0.90934518 0.93081927 0.94719602 0.96166977
0.00000000 0.00948326 0.04926142 0.13740301 0.31981477 0.62201963 0.85451547 0.90640359 0.92831123 0.94498752 0.95969464
0.00000000 0.00944184 0.04734325 0.13977095 0.31752994 0.62208835 0.85106439 0.90345266 0.92579470 0.94276740 0.95770290
0.00000000 0.00955679 0.04600171 0.14105748 0.31485115 0.62194496 0.84742176 0.90031753 0.92309395 0.94036052 0.95552073
0.00000000 0.00927994 0.04466171 0.14099782 0.31206874 0.62164463 0.84380725 0.89724370 0.92045700 0.93801628 0.95339851
0.00000000 0.00886667 0.04364779 0.13939689 0.30925168 0.62128189 0.84053974 0.89452919 0.91817981 0.93603013 0.95163179
0.00000000 0.00874409 0.04265221 0.13564911 0.30632031 0.62076024 0.83732376 0.89187363 0.91596322 0.93410311 0.94992135
0.00000000 0.00854468 0.04159431 0.13186279 0.30326789 0.62007598 0.83413468 0.88925468 0.91378636 0.93221562 0.94824883
0.00000000 0.00839315 0.04073900 0.12816104 0.30013438 0.61928891 0.83118061 0.88687941 0.91185320 0.93056948 0.94681418
0.00000000 0.00872880 0.04032670 0.12468435 0.29698282 0.61841588 0.82842111 0.88470042 0.91011342 0.92911318 0.94556543
0.00000000 0.00931297 0.04064156 0.12160691 0.29389480 0.61749462 0.82588173 0.88273546 0.90858080 0.92785861 0.94451353
0.00000000 0.01002593 0.04156041 0.11895954 0.29089550 0.61654277 0.82358635 0.88101044 0.90728224 0.92683388 0.94368802
0.00000000 0.01095944 0.04289751 0.11669028 0.28796945 0.61550317 0.82128184 0.87926784 0.90596009 0.92578128 0.94283124
0.00000000 0.01177969 0.04450121 0.11474307 0.28510024 0.61434701 0.81884184 0.87738083 0.90448856 0.92457585 0.94181900
0.00000000 0.01219237 0.04587600 0.11292716 0.28221828 0.61304374 0.81622085 0.87531415 0.90283801 0.92319143 0.94062797
0.00000000 0.01238696 0.04699819 0.11113365 0.27928085 0.61161368 0.81358276 0.87324483 0.90119049 0.92181323 0.93944579
0.00000000 0.01158221 0.04730554 0.10916060 0.27620090 0.61002349 0.81092864 0.87118040 0.89955589 0.92045153 0.93828218
0.00000000 0.00949496 0.04607528 0.10673112 0.27286416 0.60822862 0.80825598 0.86912703 0.89794388 0.91911705 0.93714747
0.00000000 0.00862394 0.04397526 0.10395093 0.26932443 0.60625221 0.80558105 0.86709463 0.89636102 0.91781457 0.93604541
0.00000000 0.00934535 0.04272498 0.10131697 0.26578284 0.60414464 0.80276464 0.86491133 0.89462133 0.91635055 0.93477749
0.00000000 0.01101273 0.04257651 0.09914957 0.26237921 0.60218298 0.79996468 0.86272513 0.89286793 0.91486476 0.93348177
0.00000000 0.01071392 0.04293283 0.10287791 0.25909060 0.60018767 0.79728021 0.86064843 0.89121699 0.91347708 0.93228021
0.00000000 0.01096138 0.04342910 0.10546700 0.25583296 0.59811202 0.79464231 0.85861753 0.88960926 0.91213066 0.93111841
0.00000000 0.01106714 0.04400008 0.10692449 0.25266356 0.59598681 0.79202308 0.85660491 0.88801892 0.91080219 0.92997637
0.00000000 0.01121464 0.04470868 0.10700238 0.24962105 0.59381989 0.78933321 0.85451529 0.88634915 0.90939430 0.92875685
0.00000000 0.01062856 0.04502402 0.10981930 0.24656335 0.59151251 0.78631312 0.85209869 0.88435299 0.90766002 0.92721120
0.00000000 0.00961952 0.04435206 0.11122534 0.24887811 0.59006924 0.78348462 0.84989286 0.88256799 0.90613486 0.92587113
0.00000000 0.00945552 0.04404199 0.11162839 0.25081534 0.58867232 0.78099468 0.84800460 0.88108906 0.90490841 0.92482343
0.00000000 0.00972708 0.04396251 0.11030655 0.25228787 0.58721128 0.77840231 0.84598581 0.87946617 0.90352952 0.92361645
0.00000000 0.01009864 0.04422367 0.10769008 0.25321268 0.58562547 0.77555781 0.84369036 0.87755543 0.90185530 0.92210785
0.00000000 0.01009314 0.04437081 0.11554658 0.25362931 0.58403124 0.77287105 0.84154101 0.87578153 0.90031098 0.92072272
0.00000000 0.01061144 0.04489572 0.12248516 0.25355391 0.58244955 0.77036105 0.83954660 0.87415098 0.89890324 0.91946904
0.00000000 0.01055715 0.04546734 0.12841606 0.25281306 0.58082774 0.76788518 0.83756980 0.87252940 0.89749928 0.91821513
0.00000000 0.01077533 0.04591192 0.13346849 0.25117128 0.57921750 0.76558504 0.83575589 0.87106359 0.89624684 0.91710967
0.00000000 0.01093368 0.04622482 0.13746664 0.24802684 0.57751137 0.76316164 0.83381303 0.86946569 0.89486065 0.91586971
0.00000000 0.01125150 0.04617120 0.14037541 0.24470455 0.57599418 0.76070776 0.83184238 0.86783879 0.89344337 0.91459604
0.00000000 0.01165407 0.04643782 0.14257879 0.24492258 0.57462391 0.75825508 0.82985982 0.86619236 0.89200238 0.91329606
0.00000000 0.01215244 0.04690391 0.14424499 0.24459988 0.57337209 0.75596548 0.82802655 0.86468741 0.89069959 0.91213311
0.00000000 0.01112301 0.04759914 0.14562323 0.24368144 0.57224821 0.75399483 0.82648729 0.86346567 0.88967621 0.91124896
0.00000000 0.01153605 0.04840212 0.14655373 0.24148325 0.57115204 0.75206159 0.82495687 0.86223952 0.88864218 0.91035096
0.00000000 0.01199231 0.04917641 0.14685434 0.23877826 0.57007295 0.75027260 0.82355276 0.86113057 0.88772069 0.90956267
0.00000000 0.01246079 0.04997740 0.14647135 0.23618304 0.56896690 0.74846193 0.82210637 0.85996899 0.88674111 0.90871286
0.00000000 0.01264804 0.05091029 0.14532327 0.23369813 0.56780880 0.74650946 0.82049500 0.85863122 0.88557959 0.90767756
0.00000000 0.01258379 0.05441814 0.14328899 0.23421265 0.56667836 0.74463195 0.81893822 0.85733834 0.88445779 0.90667886
0.00000000 0.01235489 0.05534144 0.13972834 0.23407167 0.56565767 0.74288102 0.81747813 0.85612824 0.88341238 0.90575329
0.00000000 0.01164285 0.05491856 0.13617572 0.23259977 0.56471888 0.74137763 0.81624341 0.85513266 0.88257661 0.90503470
0.00000000 0.01123516 0.05451986 0.13302500 0.23058182 0.56384944 0.74014857 0.81526289 0.85438087 0.88197941 0.90455118
0.00000000 0.01170028 0.05448572 0.13030396 0.22869710 0.56300673 0.73901417 0.81434785 0.85367937 0.88142411 0.90410327
0.00000000 0.01203744 0.05446314 0.12779524 0.22686986 0.56211129 0.73775249 0.81328422 0.85281770 0.88070204 0.90348370
0.00000000 0.01252174 0.05468255 0.12540825 0.22503684 0.56114115 0.73637605 0.81208989 0.85181595 0.87983386 0.90271318
0.00000000 0.01204216 0.05448324 0.12308703 0.22316631 0.56005171 0.73475061 0.81063556 0.85054767 0.87869399 0.90166587
0.00000000 0.01208405 0.05370577 0.12061848 0.22122137 0.55905380 0.73292378 0.80898109 0.84907741 0.87734996 0.90041216
0.00000000 0.01208114 0.05327149 0.11836815 0.22423237 0.55872348 0.73089307 0.80710407 0.84737466 0.87576801 0.89891706
0.00000000 0.01319262 0.05252537 0.12250094 0.22953053 0.55861679 0.72903691 0.80538638 0.84582401 0.87433412 0.89756711
0.00000000 0.01267271 0.05176979 0.12568715 0.23444761 0.55857746 0.72739141 0.80386039 0.84445719 0.87308043 0.89639532
0.00000000 0.01197670 0.05108469 0.12799218 0.23901409 0.55862137 0.72598290 0.80254962 0.84329613 0.87202794 0.89542183
0.00000000 0.01166676 0.05061309 0.12940604 0.24325420 0.55878543 0.72493025 0.80157501 0.84246187 0.87129756 0.89476713
0.00000000 0.01114004 0.05051888 0.12990732 0.24719995 0.55907267 0.72419066 0.80088878 0.84190402 0.87083763 0.89437872
0.00000000 0.01066224 0.05050459 0.12884951 0.25078674 0.55943146 0.72365713 0.80038653 0.84151884 0.87054413 0.89415209
0.00000000 0.01048867 0.04997535 0.12596258 0.25381926 0.55973346 0.72311930 0.79987140 0.84111503 0.87022787 0.89389862
0.00000000 0.01034259 0.04870579 0.12280240 0.25616968 0.55989564 0.72244729 0.79922364 0.84057724 0.86977524 0.89350557
0.00000000 0.01042042 0.04760759 0.11972072 0.25800032 0.56001689 0.72175318 0.79854525 0.84000367 0.86928401 0.89307200
0.00000000 0.01020977 0.04682758 0.11684544 0.25936290 0.56011773 0.72100222 0.79779749 0.83935448 0.86871472 0.89255987
0.00000000 0.00997750 0.04623790 0.11426726 0.26029607 0.56024336 0.72027949 0.79705810 0.83870416 0.86814010 0.89204051
0.00000000 0.00985172 0.04591486 0.11203173 0.26079978 0.56041844 0.71961863 0.79635680 0.83808048 0.86758699 0.89154019
0.00000000 0.00914207 0.04518968 0.10984937 0.26068750 0.56064748 0.71918181 0.79587236 0.83766928 0.86724446 0.89124940
0.00000000 0.00926866 0.04422417 0.10762815 0.25971859 0.56085431 0.71879260 0.79542758 0.83729231 0.86693295 0.89098708
0.00000000 0.00910520 0.04321439 0.10537650 0.25726366 0.56105401 0.71850711 0.79508142 0.83700980 0.86671352 0.89081495
0.00000000 0.00927524 0.04252770 0.10330979 0.25446793 0.56127338 0.71828874 0.79478725 0.83677096 0.86653378 0.89068041
0.00000000 0.00925490 0.04224016 0.10154172 0.25185422 0.56154040 0.71814275 0.79454461 0.83657282 0.86638996 0.89057953
0.00000000 0.00939124 0.04200688 0.09991804 0.24935894 0.56182896 0.71805817 0.79434933 0.83641413 0.86628187 0.89051251
0.00000000 0.01015442 0.04214713 0.09844737 0.24698280 0.56208840 0.71786219 0.79402427 0.83611573 0.86602911 0.89029808
0.00000000 0.01025543 0.04251032 0.09712582 0.24472759 0.56227081 0.71737388 0.79338437 0.83549141 0.86544501 0.88974961
0.00000000 0.00952018 0.04249987 0.09596817 0.24261172 0.56245083 0.71680064 0.79264158 0.83475850 0.86474923 0.88908751
0.00000000 0.01096606 0.04229916 0.10130047 0.24063930 0.56260462 0.71606858 0.79172182 0.83383906 0.86386228 0.88823180
0.00000000 0.01017264 0.05051008 0.10539379 0.23872201 0.56289561 0.71548436 0.79094797 0.83306282 0.86311697 0.88751650
0.00000000 0.00894057 0.05541205 0.10822151 0.23680046 0.56318613 0.71503111 0.79030528 0.83241685 0.86250159 0.88693104
0.00000000 0.00784700 0.05822949 0.10984985 0.23491124 0.56349576 0.71472685 0.78980613 0.83191055 0.86202396 0.88648196
0.00000000 0.00749289 0.05982468 0.11024628 0.23310944 0.56388083 0.71468400 0.78955957 0.83165139 0.86179092 0.88627603
0.00000000 0.00754134 0.06064872 0.10864321 0.23142520 0.56435304 0.71489318 0.78955317 0.83162524 0.86178762 0.88629801
0.00000000 0.00798910 0.06108043 0.10642898 0.22990280 0.56486475 0.71511882 0.78954090 0.83158124 0.86176051 0.88629263
0.00000000 0.00789571 0.06074573 0.10434079 0.22844613 0.56530015 0.71507718 0.78924234 0.83124044 0.86143057 0.88598026
0.00000000 0.00746685 0.05967516 0.10224321 0.22699433 0.56562816 0.71473216 0.78862674 0.83057489 0.86077121 0.88533502
0.00000000 0.00738355 0.06058566 0.10028707 0.22907376 0.56599448 0.71416803 0.78777719 0.82966796 0.85986529 0.88443884
0.00000000 0.00963418 0.06035863 0.09830091 0.23048635 0.56641806 0.71382423 0.78714718 0.82897803 0.85917448 0.88375593
0.00000000 0.00928589 0.05956911 0.09641579 0.23109798 0.56690759 0.71368906 0.78671892 0.82848560 0.85867932 0.88326783
0.00000000 0.00887941 0.05856632 0.09477005 0.23032928 0.56751778 0.71387603 0.78660169 0.82829788 0.85848633 0.88308088
0.00000000 0.00836692 0.05689641 0.09315372 0.22900968 0.56805728 0.71383616 0.78624279 0.82786005 0.85803820 0.88263519
0.00000000 0.00753102 0.05456738 0.09144761 0.22766444 0.56840884 0.71325930 0.78533230 0.82686252 0.85702466 0.88161950
0.00000000 0.00594212 0.05823701 0.08967347 0.22631335 0.56891741 0.71239891 0.78413200 0.82557081 0.85571295 0.88030143
0.00000000 0.00929076 0.06020070 0.08776551 0.22494162 0.57016614 0.71198217 0.78338521 0.82473554 0.85485870 0.87944105
0.00000000 0.00892168 0.06131661 0.08592112 0.22361389 0.57159758 0.71213656 0.78321218 0.82447542 0.85458130 0.87915927
0.00000000 0.00864355 0.06182078 0.08422355 0.22238851 0.57316124 0.71265517 0.78339796 0.82457159 0.85465985 0.87923418
0.00000000 0.00815268 0.06207127 0.08279277 0.22131876 0.57484949 0.71345922 0.78385474 0.82493165 0.85499931 0.87956866
0.00000000 0.00752960 0.06171784 0.08143783 0.22032489 0.57654043 0.71429077 0.78432530 0.82529778 0.85534017 0.87990099
0.00000000 0.00743268 0.06084068 0.08006130 0.21934642 0.57813121 0.71492935 0.78458795 0.82544694 0.85545747 0.88000396
0.00000000 0.00726111 0.05969835 0.07870187 0.21838914 0.57970850 0.71561060 0.78488581 0.82562605 0.85560087 0.88012966
0.00000000 0.00659070 0.05804281 0.07734068 0.21745900 0.58112429 0.71588823 0.78476568 0.82537961 0.85531405 0.87982191
0.00000000 0.00499834 0.05576206 0.07602060 0.21659652 0.58245954 0.71594225 0.78440717 0.82488796 0.85477843 0.87926341
0.00000000 0.00280014 0.05297534 0.07471730 0.21578947 0.58393706 0.71643995 0.78449040 0.82483612 0.85468151 0.87914262
0.00000000 0.00232098 0.04967743 0.07338445 0.21500525 0.58558930 0.71752275 0.78516030 0.82536883 0.85516677 0.87960100
0.00000000 0.00194724 0.04573552 0.07204695 0.21423940 0.58728431 0.71880975 0.78602525 0.82608853 0.85583222 0.88023270
0.00000000 0.00251306 0.04065962 0.07069239 0.21347145 0.58890148 0.71997685 0.78675668 0.82666378 0.85634405 0.88070201
0.00000000 0.00222903 0.03519398 0.06941912 0.21275074 0.59052958 0.72121264 0.78754753 0.82729097 0.85690221 0.88121268
0.00000000 0.00185005 0.03049525 0.06810297 0.21204420 0.59216372 0.72253489 0.78842290 0.82799884 0.85753770 0.88179760
0.00000000 0.00265876 0.02693939 0.06681302 0.21136219 0.59377090 0.72384521 0.78927979 0.82868137 0.85814223 0.88234652
0.00000000 0.00247554 0.02445241 0.06577546 0.21080899 0.59555230 0.72561724 0.79059738 0.82982166 0.85920321 0.88335143
0.00000000 0.00193908 0.02229418 0.06488755 0.21037302 0.59729053 0.72718918 0.79170221 0.83074190 0.86004045 0.88413087
0.00000000 0.00240025 0.02049302 0.06397188 0.20995505 0.59889018 0.72840323 0.79243590 0.83128155 0.86048979 0.88451622
0.00000000 0.00212379 0.01876335 0.06301939 0.20954229 0.60032788 0.72919185 0.79272937 0.83137158 0.86048234 0.88443873
0.00000000 0.00208941 0.01730515 0.06207102 0.20915285 0.60171023 0.72987188 0.79290511 0.83133694 0.86034464 0.88422619
0.00000000 0.00186801 0.01605465 0.06112575 0.20878317 0.60303697 0.73044297 0.79296342 0.83117847 0.86007795 0.88388020
0.00000000 0.00198866 0.01510124 0.06013049 0.20840438 0.60428371 0.73086415 0.79286694 0.83086030 0.85964790 0.88336713
0.00000000 0.00148315 0.01413091 0.05925484 0.20810314 0.60601497 0.73192182 0.79341260 0.83118798 0.85986479 0.88350141
0.00000000 0.00094459 0.01320913 0.05849263 0.20788957 0.60792376 0.73349584 0.79447714 0.83203283 0.86059763 0.88415080
0.00000000 0.00068835 0.01215030 0.05765493 0.20767211 0.60965477 0.73462992 0.79508824 0.83241488 0.86085973 0.88432235
0.00000000 0.00091918 0.01113011 0.05671804 0.20741661 0.61123261 0.73544324 0.79536756 0.83245600 0.86077217 0.88413585
0.00000000 0.00025581 0.01007937 0.05580692 0.20718847 0.61291951 0.73664920 0.79604039 0.83288687 0.86107020 0.88433070
0.00000000 0.00012732 0.00908820 0.05486982 0.20696464 0.61485908 0.73872507 0.79759790 0.83420252 0.86225051 0.88540414
0.00000000 0.00000000 0.00810325 0.05393721 0.20675753 0.61698998 0.74146423 0.79982877 0.83618916 0.86409767 0.88713952
0.00000000 0.00000000 0.00714440 0.05301058 0.20656931 0.61910169 0.74421138 0.80206260 0.83816986 0.86593034 0.88885223
0.00000000 0.00000000 0.00622683 0.05202282 0.20635803 0.62111371 0.74676926 0.80410047 0.83994449 0.86754677 0.89033877
0.00000000 0.00000000 0.00541607 0.05099352 0.20612723 0.62302212 0.74911878 0.80592594 0.84149914 0.86893543 0.89159010
0.00000000 0.00000000 0.00470831 0.04996428 0.20590087 0.62477362 0.75105290 0.80733049 0.84262745 0.86989300 0.89240659
0.00000000 0.00000000 0.00407997 0.04896370 0.20569850 0.62637225 0.75255369 0.80829703 0.84331482 0.87040766 0.89277941
0.00000000 0.00000000 0.00357398 0.04804122 0.20554777 0.62803040 0.75427937 0.80949582 0.84423587 0.87115698 0.89338824
0.00000000 0.00000000 0.00311920 0.04721094 0.20546056 0.62980290 0.75639490 0.81109448 0.84555887 0.87230953 0.89440180
0.00000000 0.00000000 0.00258077 0.04639917 0.20540565 0.63160246 0.75865543 0.81284365 0.84703162 0.87361042 0.89556248
0.00000000 0.00000000 0.00197270 0.04555665 0.20535198 0.63351683 0.76140467 0.81509461 0.84900617 0.87541073 0.89721945
0.00000000 0.00000000 0.00138063 0.04469577 0.20530042 0.63545709 0.76434746 0.81754645 0.85117920 0.87740561 0.89906687
0.00000000 0.00000000 0.00092763 0.04388410 0.20527803 0.63740133 0.76737375 0.82008618 0.85343740 0.87948233 0.90099306
0.00000000 0.00000000 0.00055169 0.04311652 0.20528772 0.63933997 0.77044684 0.82267981 0.85574927 0.88161178 0.90297133
0.00000000 0.00000000 0.00018415 0.04236141 0.20531627 0.64121767 0.77339052 0.82515037 0.85793864 0.88361868 0.90482743
0.00000000 0.00000000 0.00000000 0.04162503 0.20536799 0.64299334 0.77605111 0.82734165 0.85984953 0.88534780 0.90640718
0.00000000 0.00000000 0.00000000 0.04094125 0.20545719 0.64466263 0.77839030 0.82921325 0.86144153 0.88675918 0.90767129
0.00000000 0.00000000 0.00000000 0.04031970 0.20559336 0.64622320 0.78037871 0.83073501 0.86268544 0.88782487 0.90859319
0.00000000 0.00000000 0.00000000 0.03972576 0.20575904 0.64773365 0.78226057 0.83215669 0.86383248 0.88879635 0.90942399
0.00000000 0.00000000 0.00000000 0.03918016 0.20596418 0.64928491 0.78435873 0.83380738 0.86521388 0.89000617 0.91049703
0.00000000 0.00000000 0.00000000 0.03865854 0.20619784 0.65079342 0.78638031 0.83538915 0.86653002 0.89115363 0.91151092
0.00000000 0.00000000 0.00000000 0.03818489 0.20646608 0.65231303 0.78852190 0.83710328 0.86798409 0.89244330 0.91267127
0.00000000 0.00000000 0.00000000 0.03777127 0.20678113 0.65383464 0.79072652 0.83889383 0.86952200 0.89382321 0.91392842
0.00000000 0.00000000 0.00000000 0.03741448 0.20714416 0.65536956 0.79303946 0.84080674 0.87118971 0.89533923 0.91532802
0.00000000 0.00000000 0.00000000 0.03710772 0.20755241 0.65689619 0.79538312 0.84276178 0.87290558 0.89690851 0.91678614
0.00000000 0.00000000 0.00000000 0.03684437 0.20800280 0.65834630 0.79748617 0.84448015 0.87438797 0.89824758 0.91801787
0.00000000 0.00000000 0.00000000 0.03661426 0.20848803 0.65974243 0.79945647 0.84607011 0.87574443 0.89946283 0.91912820
0.00000000 0.00000000 0.00000000 0.03641753 0.20900750 0.66118678 0.80172967 0.84797535 0.87742025 0.90099977 0.92056205
0.00000000 0.00000000 0.00000000 0.03623594 0.20955454 0.66262756 0.80410832 0.84999221 0.87920841 0.90264869 0.92210730
0.00000000 0.00000000 0.00000000 0.03604005 0.21010810 0.66404800 0.80657721 0.85210261 0.88108745 0.90438455 0.92373513
0.00000000 0.00000000 0.00000000 0.03583525 0.21065900 0.66546188 0.80922915 0.85440047 0.88315042 0.90629906 0.92553569
0.00000000 0.00000000 0.00000000 0.03563924 0.21121758 0.66673644 0.81144030 0.85625001 0.88475972 0.90775503 0.92687349
0.00000000 0.00000000 0.00000000 0.03545234 0.21178625 0.66786434 0.81316149 0.85760077 0.88586550 0.90870343 0.92770048
0.00000000 0.00000000 0.00000000 0.03527361 0.21236304 0.66900506 0.81515038 0.85922593 0.88724482 0.90992263 0.92879490
0.00000000 0.00000000 0.00000000 0.03510257 0.21295210 0.67006596 0.81695824 0.86066704 0.88843668 0.91095079 0.92969493
0.00000000 0.00000000 0.00000000 0.03491692 0.21353904 0.67104617 0.81862209 0.86195923 0.88947389 0.91181805 0.93042789
0.00000000 0.00000000 0.00000000 0.03471365 0.21411400 0.67196255 0.82025888 0.86322077 0.89047388 0.91264046 0.93110822
0.00000000 0.00000000 0.00000000 0.03450801 0.21468155 0.67282873 0.82193312 0.86451936 0.89150620 0.91348926 0.93180871
0.00000000 0.00000000 0.00000000 0.03431577 0.21525397 0.67376849 0.82428793 0.86651497 0.89323650 0.91503366 0.93320102
0.00000000 0.00000000 0.00000000 0.03413507 0.21583772 0.67462462 0.82647643 0.86834387 0.89479747 0.91640575 0.93441835
0.00000000 0.00000000 0.00000000 0.03394051 0.21641796 0.67545945 0.82891405 0.87042730 0.89660902 0.91802257 0.93587391
0.00000000 0.00000000 0.00000000 0.03372908 0.21698530 0.67622471 0.83138204 0.87254035 0.89844302 0.91965337 0.93733479
0.00000000 0.00000000 0.00000000 0.03350862 0.21754070 0.67683665 0.83338121 0.87417420 0.89978946 0.92078863 0.93829292
0.00000000 0.00000000 0.00000000 0.03328979 0.21808917 0.67732354 0.83505874 0.87548130 0.90080427 0.92158727 0.93891000
0.00000000 0.00000000 0.00000000 0.03308204 0.21863571 0.67766590 0.83625784 0.87630332 0.90133099 0.92189523 0.93903470
0.00000000 0.00000000 0.00000000 0.03290217 0.21919537 0.67786639 0.83691255 0.87657430 0.90130655 0.92165287 0.93861106
0.00000000 0.00000000 0.00000000 0.03273932 0.22359775 0.67808285 0.83814132 0.87743477 0.90187456 0.92200344 0.93878002
0.00000000 0.00000000 0.00000000 0.03258643 0.22696011 0.67834110 0.84026688 0.87921427 0.90336120 0.92326879 0.93985799
0.00000000 0.00000000 0.00000000 0.03242879 0.22832877 0.67847244 0.84215783 0.88075593 0.90460510 0.92428586 0.94068252
0.00000000 0.00000000 0.00000000 0.03227629 0.22880795 0.67851912 0.84427018 0.88252830 0.90607793 0.92552822 0.94172814
0.00000000 0.00000000 0.00000000 0.03213689 0.22928885 0.67838395 0.84574785 0.88366036 0.90691095 0.92613161 0.94213693
0.00000000 0.00000000 0.00000000 0.03202414 0.22978122 0.67812718 0.84718339 0.88475842 0.90771353 0.92670713 0.94252049
0.00000000 0.00000000 0.00000000 0.03192231 0.23028143 0.67767906 0.84791852 0.88514829 0.90780958 0.92657856 0.94220380
0.00000000 0.00000000 0.00000000 0.03182358 0.23078128 0.67782879 0.84867670 0.88556437 0.90793112 0.92647518 0.94191112
0.00000000 0.00000000 0.00000000 0.03172838 0.23128218 0.67791714 0.84972452 0.88627833 0.90835077 0.92666799 0.94191207
0.00000000 0.00000000 0.00000000 0.03163196 0.23178003 0.67796271 0.85139816 0.88763476 0.90941237 0.92749861 0.94254595
0.00000000 0.00000000 0.00000000 0.03153676 0.23227476 0.67791390 0.85344294 0.88937563 0.91085816 0.92871047 0.94355762
0.00000000 0.00000000 0.00000000 0.03144496 0.23276657 0.67770036 0.85535987 0.89099169 0.91217851 0.92979548 0.94444109
0.00000000 0.00000000 0.00000000 0.03135983 0.23325760 0.67730160 0.85718071 0.89251714 0.91340928 0.93079102 0.94523522
0.00000000 0.00000000 0.00000000 0.03128064 0.23374680 0.67667175 0.85890884 0.89395546 0.91455381 0.93170029 0.94594306
0.00000000 0.00000000 0.00000000 0.03120621 0.23423252 0.67566653 0.86113495 0.89591193 0.91621793 0.93312735 0.94716625
0.00000000 0.00000000 0.00000000 0.03113863 0.23471469 0.67427351 0.86304143 0.89755305 0.91756824 0.93424206 0.94807877
0.00000000 0.00000000 0.00000000 0.03107734 0.23519260 0.67289999 0.86484046 0.89909519 0.91882129 0.93526033 0.94889568
0.00000000 0.00000000 0.00000000 0.03102195 0.23566619 0.67154533 0.86657640 0.90058307 0.92002180 0.93622672 0.94966129
0.00000000 0.00000000 0.00000000 0.03097209 0.23613548 0.67020934 0.86838822 0.90215869 0.92131206 0.93728322 0.95051719
0.00000000 0.00000000 0.00000000 0.03092823 0.23660088 0.66889217 0.87010332 0.90364569 0.92251598 0.93825476 0.95128944
0.00000000 0.00000000 0.00000000 0.03089122 0.23706320 0.66759379 0.87160081 0.90492028 0.92351034 0.93901910 0.95185695
0.00000000 0.00000000 0.00000000 0.03086016 0.23752177 0.66631313 0.87314188 0.90624879 0.92456132 0.93984128 0.95248331
0.00000000 0.00000000 0.00000000 0.03083585 0.23797733 0.66505143 0.87514459 0.90805992 0.92609843 0.94114991 0.95359576
0.00000000 0.00000000 0.00000000 0.03081815 0.23842987 0.66380981 0.87752477 0.91026869 0.92803673 0.94286046 0.95511021
0.00000000 0.00000000 0.00000000 0.03080688 0.23887923 0.66258875 0.88003216 0.91261961 0.93012067 0.94471824 0.95677313
0.00000000 0.00000000 0.00000000 0.03080283 0.23932624 0.66138836 0.88221397 0.91464928 0.93188704 0.94626206 0.95812586
0.00000000 0.00000000 0.00000000 0.03080445 0.23976996 0.66020646 0.88404235 0.91632713 0.93330464 0.94746024 0.95913628
0.00000000 0.00000000 0.00000000 0.03081291 0.24021174 0.65904353 0.88587207 0.91801654 0.93473807 0.94867715 0.96016814
0.00000000 0.00000000 0.00000000 0.03082631 0.24065020 0.65789712 0.88723529 0.91923618 0.93570436 0.94943020 0.96073970
0.00000000 0.00000000 0.00000000 0.03084405 0.24108587 0.65676712 0.88872525 0.92059334 0.93681174 0.95032614 0.96145557
0.00000000 0.00000000 0.00000000 0.03086563 0.24151782 0.65565395 0.89083680 0.92259543 0.93856768 0.95187046 0.96281869
0.00000000 0.00000000 0.00000000 0.03089328 0.24194722 0.65455795 0.89198152 0.92361676 0.93934698 0.95244489 0.96321953
0.00000000 0.00000000 0.00000000 0.03092757 0.24237472 0.65347758 0.89304975 0.92456678 0.94005912 0.95295543 0.96355960
0.00000000 0.00000000 0.00000000 0.03097088 0.24280306 0.65241606 0.89471818 0.92614123 0.94140207 0.95409947 0.96453486
0.00000000 0.00000000 0.00000000 0.03100937 0.24362134 0.65012849 0.89725906 0.92886073 0.94386848 0.95631245 0.96652736
0.00000000 0.00000000 0.00000000 0.03104786 0.24443962 0.64784091 0.89979994 0.93158022 0.94633489 0.95852543 0.96851987
0.00000000 0.00000000 0.00000000 0.03108636 0.24525790 0.64555334 0.90234083 0.93429972 0.94880130 0.96073840 0.97051238
0.00000000 0.00000000 0.00000000 0.03112485 0.24607618 0.64326576 0.90488171 0.93701921 0.95126772 0.96295138 0.97250488
0.00000000 0.00000000 0.00000000 0.03116334 0.24689446 0.64097819 0.90742259 0.93973871 0.95373413 0.96516436 0.97449739
0.00000000 0.00000000 0.00000000 0.03120183 0.24771274 0.63869061 0.90996347 0.94245820 0.95620054 0.96737733 0.97648989
0.00000000 0.00000000 0.00000000 0.03124032 0.24853103 0.63640303 0.91250435 0.94517770 0.95866695 0.96959031 0.97848240
0.00000000 0.00000000 0.00000000 0.03127882 0.24934931 0.63411546 0.91504523 0.94789719 0.96113336 0.97180329 0.98047490
0.00000000 0.00000000 0.00000000 0.03131731 0.25016759 0.63182788 0.91758611 0.95061669 0.96359977 0.97401626 0.98246741
0.00000000 0.00000000 0.00000000 0.03135580 0.25098587 0.62954031 0.92012699 0.95333618 0.96606618 0.97622924 0.98445992
0.00000000 0.00000000 0.00000000 0.03139429 0.25180415 0.62725273 0.92266787 0.95605568 0.96853259 0.97844222 0.98645242
0.00000000 0.00000000 0.00000000 0.03143279 0.25262243 0.62496516 0.92520875 0.95877517 0.97099900 0.98065519 0.98844493
0.00000000 0.00000000 0.00000000 0.03147128 0.25344071 0.62267758 0.92774963 0.96149466 0.97346541 0.98286817 0.99043743
0.00000000 0.00000000 0.00000000 0.03150977 0.25425900 0.62039001 0.93029051 0.96421416 0.97593182 0.98508115 0.99242994
0.00000000 0.00000000 0.00000000 0.03154826 0.25507728 0.61810243 0.93283139 0.96693365 0.97839823 0.98729412 0.99442244
0.00000000 0.00000000 0.00000000 0.03158676 0.25589556 0.61581485 0.93537227 0.96965315 0.98086464 0.98950710 0.99641495
0.00000000 0.00000000 0.00000000 0.03162525 0.25671384 0.61352728 0.93791315 0.97237264 0.98333105 0.99172008 0.99840746
0.00000000 0.00000000 0.00000000 0.03166374 0.25753212 0.61123970 0.94045403 0.97509214 0.98579746 0.99393305 1.00039996
0.00000000 0.00000000 0.00000000 0.03170223 0.25835040 0.60895213 0.94299492 0.97781163 0.98826387 0.99614603 1.00239247
0.00000000 0.00000000 0.00000000 0.03174072 0.25916868 0.60666455 0.94553580 0.98053113 0.99073028 0.99835901 1.00438497
0.00000000 0.00000000 0.00000000 0.03195075 0.25943600 0.60621904 0.94717646 0.98219768 0.99225968 0.99976383 1.00568873
0.00000000 0.00000000 0.00000000 0.03215739 0.25969959 0.60578135 0.94840079 0.98344045 0.99336935 1.00075319 1.00658149
0.00000000 0.00000000 0.00000000 0.03235689 0.25995504 0.60534671 0.94968187 0.98474280 0.99453859 1.00180108 1.00753119
0.00000000 0.00000000 0.00000000 0.03255838 0.26021318 0.60492407 0.95027472 0.98534448 0.99501626 1.00216765 1.00781034
0.00000000 0.00000000 0.00000000 0.03275753 0.26046852 0.60450674 0.95065411 0.98572874 0.99528048 1.00232456 1.00788348
0.00000000 0.00000000 0.00000000 0.03295124 0.26071762 0.60409193 0.95152203 0.98661718 0.99604927 1.00298423 1.00845638
0.00000000 0.00000000 0.00000000 0.03313659 0.26095712 0.60367736 0.95246598 0.98758232 0.99689308 1.00371627 1.00909847
0.00000000 0.00000000 0.00000000 0.03331944 0.26119387 0.60326881 0.95302832 0.98815715 0.99735064 1.00406656 1.00936345
0.00000000 0.00000000 0.00000000 0.03350025 0.26142811 0.60286512 0.95321904 0.98835078 0.99743095 1.00404403 1.00926018
0.00000000 0.00000000 0.00000000 0.03367882 0.26165971 0.60246609 0.95373443 0.98888160 0.99785141 1.00436293 1.00949870
0.00000000 0.00000000 0.00000000 0.03385201 0.26188905 0.60207240 0.95427779 0.98944378 0.99830646 1.00471895 1.00977639
0.00000000 0.00000000 0.00000000 0.03402244 0.26211566 0.60168361 0.95469336 0.98987636 0.99863527 1.00495186 1.00993388
0.00000000 0.00000000 0.00000000 0.03418588 0.26233458 0.60129464 0.95503691 0.99023223 0.99888652 1.00510606 1.01001127
0.00000000 0.00000000 0.00000000 0.03434318 0.26254627 0.60090553 0.95523436 0.99043500 0.99898426 1.00510633 1.00993413
0.00000000 0.00000000 0.00000000 0.03449840 0.26275544 0.60051986 0.95508155 0.99027716 0.99872500 1.00475379 1.00950856
0.00000000 0.00000000 0.00000000 0.03465169 0.26296215 0.60013689 0.95482740 0.99001515 0.99836471 1.00430326 1.00898779
0.00000000 0.00000000 0.00000000 0.03480274 0.26316600 0.59975675 0.95502423 0.99021967 0.99847294 1.00432135 1.00893465
0.00000000 0.00000000 0.00000000 0.03494780 0.26336268 0.59937658 0.95551816 0.99072918 0.99888494 1.00464060 1.00917924
0.00000000 0.00000000 0.00000000 0.03508681 0.26355221 0.59899586 0.95539558 0.99059918 0.99865743 1.00432194 1.00878820
0.00000000 0.00000000 0.00000000 0.03522396 0.26373937 0.59861917 0.95602061 0.99124373 0.99920636 1.00477875 1.00917009
0.00000000 0.00000000 0.00000000 0.03535943 0.26392422 0.59824855 0.95720156 0.99246650 1.00033570 1.00581582 1.01013089
0.00000000 0.00000000 0.00000000 0.03549320 0.26410678 0.59788442 0.95814685 0.99344942 1.00122821 1.00661937 1.01086154
0.00000000 0.00000000 0.00000000 0.03562498 0.26428687 0.59752646 0.95921449 0.99456243 1.00225339 1.00755726 1.01172766
0.00000000 0.00000000 0.00000000 0.03575515 0.26446476 0.59717512 0.96040026 0.99580134 1.00340697 1.00862517 1.01272493
0.00000000 0.00000000 0.00000000 0.03588374 0.26464048 0.59683071 0.96170132 0.99716344 1.00468618 1.00982027 1.01385045
0.00000000 0.00000000 0.00000000 0.03601035 0.26481411 0.59649354 0.96311100 0.99864200 1.00608425 1.01113578 1.01509743
0.00000000 0.00000000 0.00000000 0.03613190 0.26498592 0.59616371 0.96445241 1.00005383 1.00741808 1.01238927 1.01628445
0.00000000 0.00000000 0.00000000 0.03624493 0.26514754 0.59583376 0.96607024 1.00174866 1.00903025 1.01391512 1.01773716
0.00000000 0.00000000 0.00000000 0.03635509 0.26530567 0.59551037 0.96768126 1.00343976 1.01064003 1.01543948 1.01918902
0.00000000 0.00000000 0.00000000 0.03646985 0.26546885 0.59520112 0.96906140 1.00490228 1.01202986 1.01675275 1.02043870
0.00000000 0.00000000 0.00000000 0.03658344 0.26563013 0.59489878 0.97036996 1.00629403 1.01335123 1.01799965 1.02162394
0.00000000 0.00000000 0.00000000 0.03669126 0.26578440 0.59459891 0.97196490 1.00798157 1.01496619 1.01953658 1.02309491
0.00000000 0.00000000 0.00000000 0.03679568 0.26593454 0.59430440 0.97346078 1.00956832 1.01648085 1.02097360 1.02446632
0.00000000 0.00000000 0.00000000 0.03689878 0.26608282 0.59401709 0.97492518 1.01112598 1.01796868 1.02238573 1.02581455
0.00000000 0.00000000 0.00000000 0.03700066 0.26622931 0.59373683 0.97636338 1.01265985 1.01943489 1.02377809 1.02714467
0.00000000 0.00000000 0.00000000 0.03710135 0.26637404 0.59346315 0.97756399 1.01395028 1.02065995 1.02493205 1.02823926
0.00000000 0.00000000 0.00000000 0.03720088 0.26651690 0.59319481 0.97840609 1.01487058 1.02151686 1.02572078 1.02897191
0.00000000 0.00000000 0.00000000 0.03729402 0.26665287 0.59292694 0.97947290 1.01602107 1.02260148 1.02673364 1.02992452
0.00000000 0.00000000 0.00000000 0.03738108 0.26678345 0.59266149 0.98071172 1.01734897 1.02386225 1.02792048 1.03104846
0.00000000 0.00000000 0.00000000 0.03748431 0.26693365 0.59242203 0.98187933 1.01862432 1.02509020 1.02909390 1.03217808
0.00000000 0.00000000 0.00000000 0.03758534 0.26708071 0.59218670 0.98293454 1.01978313 1.02620189 1.03015142 1.03319213
0.00000000 0.00000000 0.00000000 0.03768280 0.26722387 0.59195444 0.98384183 1.02078763 1.02715906 1.03105451 1.03405180
0.00000000 0.00000000 0.00000000 0.03777708 0.26736329 0.59172491 0.98460834 1.02164502 1.02796903 1.03181060 1.03476469
0.00000000 0.00000000 0.00000000 0.03786802 0.26749879 0.59149743 0.98523547 1.02235618 1.02863249 1.03242020 1.03533111
0.00000000 0.00000000 0.00000000 0.03795576 0.26763060 0.59127171 0.98572974 1.02292772 1.02915623 1.03289027 1.03575821
0.00000000 0.00000000 0.00000000 0.03804041 0.26775878 0.59104739 0.98609207 1.02336035 1.02954098 1.03322164 1.03604688
0.00000000 0.00000000 0.00000000 0.03812237 0.26788355 0.59082419 0.98632459 1.02365615 1.02978898 1.03341671 1.03619969
0.00000000 0.00000000 0.00000000 0.03820095 0.26800453 0.59060076 0.98608808 1.02346154 1.02954655 1.03312299 1.03586600
0.00000000 0.00000000 0.00000000 0.03827734 0.26812254 0.59037664 0.98555006 1.02295042 1.02898816 1.03251501 1.03522004
0.00000000 0.00000000 0.00000000 0.03835137 0.26823752 0.59015071 0.98466020 1.02206963 1.02806061 1.03153974 1.03420907
0.00000000 0.00000000 0.00000000 0.03842361 0.26835024 0.58992404 0.98434591 1.02178421 1.02772875 1.03115826 1.03378874
0.00000000 0.00000000 0.00000000 0.03849450 0.26846115 0.58969873 0.98452643 1.02201213 1.02791101 1.03128970 1.03387905
0.00000000 0.00000000 0.00000000 0.03857671 0.26858467 0.58948918 0.98479199 1.02234077 1.02820688 1.03154704 1.03410709
0.00000000 0.00000000 0.00000000 0.03865874 0.26870747 0.58928404 0.98578054 1.02342265 1.02925728 1.03255722 1.03508474
0.00000000 0.00000000 0.00000000 0.03873939 0.26882850 0.58908393 0.98705756 1.02480621 1.03061004 1.03386912 1.03636276
0.00000000 0.00000000 0.00000000 0.03881841 0.26894758 0.58888866 0.98808661 1.02593293 1.03170653 1.03492611 1.03738748
0.00000000 0.00000000 0.00000000 0.03889528 0.26906428 0.58869661 0.98862143 1.02654514 1.03228878 1.03547101 1.03790297
0.00000000 0.00000000 0.00000000 0.03896998 0.26917861 0.58850657 0.98889588 1.02688525 1.03259919 1.03574526 1.03814930
0.00000000 0.00000000 0.00000000 0.03904254 0.26929059 0.58831824 0.98926306 1.02732075 1.03300510 1.03611470 1.03849012
0.00000000 0.00000000 0.00000000 0.03911298 0.26940024 0.58813127 0.98933311 1.02744537 1.03310036 1.03617489 1.03852346
0.00000000 0.00000000 0.00000000 0.03918132 0.26950756 0.58794466 0.98907215 1.02722308 1.03284895 1.03589001 1.03821375
0.00000000 0.00000000 0.00000000 0.03924759 0.26961255 0.58775805 0.98892137 1.02711325 1.03271008 1.03571732 1.03801548
0.00000000 0.00000000 0.00000000 0.03931178 0.26971522 0.58757119 0.98852236 1.02674234 1.03231034 1.03528501 1.03755914
0.00000000 0.00000000 0.00000000 0.03937391 0.26981557 0.58738356 0.98804852 1.02629073 1.03183002 1.03477262 1.03702316
0.00000000 0.00000000 0.00000000 0.03943399 0.26991357 0.58719528 0.98772341 1.02599160 1.03150220 1.03441222 1.03663820
0.00000000 0.00000000 0.00000000 0.03949201 0.27000923 0.58700640 0.98730594 1.02559380 1.03107585 1.03395383 1.03615582
0.00000000 0.00000000 0.00000000 0.03954798 0.27010252 0.58681643 0.98667903 1.02497496 1.03042860 1.03327567 1.03545501
0.00000000 0.00000000 0.00000000 0.03960186 0.27019342 0.58662556 0.98639839 1.02471484 1.03014001 1.03295473 1.03510917
0.00000000 0.00000000 0.00000000 0.03965362 0.27028189 0.58643496 0.98652166 1.02487463 1.03027129 1.03305194 1.03517885
0.00000000 0.00000000 0.00000000 0.03970325 0.27036789 0.58624586 0.98706076 1.02546790 1.03083605 1.03358083 1.03567748
0.00000000 0.00000000 0.00000000 0.03975068 0.27045137 0.58605852 0.98737730 1.02582884 1.03116858 1.03387850 1.03594623
0.00000000 0.00000000 0.00000000 0.03979586 0.27053227 0.58587242 0.98764572 1.02613915 1.03145054 1.03412588 1.03616492
0.00000000 0.00000000 0.00000000 0.03983870 0.27061052 0.58568719 0.98776814 1.02629646 1.03157960 1.03422108 1.03623229
0.00000000 0.00000000 0.00000000 0.03987909 0.27068600 0.58550210 0.98763579 1.02618673 1.03144174 1.03405059 1.03603558
0.00000000 0.00000000 0.00000000 0.03991692 0.27075861 0.58531690 0.98765816 1.02623746 1.03146440 1.03404002 1.03599775
0.00000000 0.00000000 0.00000000 0.03995203 0.27082819 0.58513120 0.98735341 1.02594533 1.03114434 1.03368833 1.03562091
0.00000000 0.00000000 0.00000000 0.03998492 0.27089497 0.58494412 0.98672842 1.02531686 1.03048821 1.03300231 1.03491196
0.00000000 0.00000000 0.00000000 0.04001447 0.27095802 0.58475434 0.98602923 1.02460834 1.02975190 1.03223636 1.03412334
0.00000000 0.00000000 0.00000000 0.04004090 0.27101767 0.58456293 0.98585069 1.02444246 1.02955844 1.03201122 1.03387232
0.00000000 0.00000000 0.00000000 0.04010371 0.27109087 0.58437852 0.98613289 1.02475557 1.02984305 1.03226160 1.03409348
0.00000000 0.00000000 0.00000000 0.04021038 0.27118117 0.58420341 0.98635792 1.02500694 1.03006531 1.03244973 1.03425271
0.00000000 0.00000000 0.00000000 0.04033610 0.27127812 0.58403337 0.98644763 1.02511737 1.03014775 1.03249993 1.03427613
0.00000000 0.00000000 0.00000000 0.04049176 0.27138624 0.58386993 0.98660491 1.02529794 1.03030087 1.03262130 1.03437109
0.00000000 0.00000000 0.00000000 0.04068953 0.27151032 0.58371490 0.98693771 1.02566036 1.03063526 1.03292295 1.03464509
0.00000000 0.00000000 0.00000000 0.04094724 0.27165692 0.58357135 0.98722659 1.02597526 1.03092177 1.03317707 1.03487214
0.00000000 0.00000000 0.00000000 0.04128537 0.27183400 0.58344396 0.98732044 1.02608724 1.03100796 1.03323491 1.03490751
0.00000000 0.00009010 0.00000000 0.04171443 0.27204490 0.58333647 0.98729478 1.02608059 1.03098317 1.03319036 1.03484938
0.00000000 0.00087646 0.00000000 0.04223263 0.27229064 0.58325431 0.98731902 1.02614186 1.03104227 1.03324547 1.03490645
0.00000000 0.00141059 0.00000000 0.04282832 0.27257612 0.58320443 0.98754870 1.02644083 1.03136136 1.03358169 1.03526506
0.00000000 0.00168541 0.00000000 0.04346514 0.27288449 0.58317745 0.98745402 1.02641986 1.03137923 1.03363639 1.03536204
0.00000000 0.00238819 0.00000000 0.04412872 0.27320949 0.58316837 0.98715267 1.02619982 1.03121472 1.03352577 1.03531062
0.00000000 0.00346631 0.00110048 0.04487278 0.27356615 0.58318377 0.98683194 1.02597500 1.03106155 1.03344244 1.03530206
0.00000000 0.00459965 0.00277293 0.04574477 0.27398227 0.58324330 0.98641874 1.02567640 1.03085896 1.03333447 1.03529351
0.00000000 0.00588150 0.00472189 0.04677288 0.27447545 0.58335801 0.98567110 1.02505156 1.03035663 1.03295509 1.03504230
0.00000000 0.00743607 0.00696764 0.04796477 0.27505125 0.58353146 0.98463322 1.02414583 1.02959989 1.03234941 1.03459322
0.00000000 0.00913240 0.00949771 0.04930705 0.27570507 0.58376340 0.98323324 1.02288407 1.02851394 1.03144312 1.03387245
0.00000000 0.01017700 0.01207830 0.05078200 0.27643708 0.58405642 0.98175533 1.02156469 1.02739820 1.03053515 1.03317777
0.00000000 0.01062943 0.01458271 0.05236536 0.27724163 0.58440498 0.98006635 1.02004171 1.02610097 1.02946879 1.03234769
0.00000000 0.01079055 0.01696167 0.05401540 0.27809868 0.58479277 0.97812091 1.01825978 1.02455943 1.02817385 1.03130455
0.00000000 0.01042438 0.01908512 0.05568964 0.27898635 0.58520279 0.97603459 1.01633445 1.02288354 1.02675385 1.03014506
0.00000000 0.00939751 0.02078583 0.05732726 0.27987593 0.58561439 0.97388965 1.01434747 1.02114975 1.02527925 1.02893318
0.00000000 0.00825423 0.02205170 0.05886302 0.28072987 0.58599963 0.97164916 1.01225395 1.01930589 1.02369023 1.02760128
0.00000000 0.00746241 0.02302812 0.06026866 0.28152080 0.58633779 0.96941268 1.01015498 1.01744850 1.02207789 1.02623462
0.00000000 0.00686829 0.02378080 0.06157014 0.28225239 0.58662935 0.96726331 1.00813758 1.01566424 1.02052831 1.02491862
0.00000000 0.00672610 0.02446042 0.06277741 0.28290764 0.58685480 0.96531533 1.00631321 1.01405585 1.01913503 1.02373738
0.00000000 0.00698218 0.02521887 0.06396593 0.28353497 0.58705253 0.96370272 1.00483633 1.01279118 1.01807895 1.02288508
0.00000000 0.00763883 0.02616725 0.06518681 0.28415805 0.58723877 0.96243026 1.00371645 1.01188386 1.01737807 1.02238422
0.00000000 0.00863275 0.02738974 0.06648510 0.28479793 0.58742746 0.96133175 1.00278179 1.01116459 1.01686662 1.02207322
0.00000000 0.00982212 0.02894412 0.06788877 0.28546802 0.58762822 0.96003687 1.00164496 1.01024742 1.01616204 1.02157379
0.00000000 0.01090005 0.03070938 0.06940309 0.28617515 0.58784730 0.95845608 1.00021445 1.00904359 1.01517871 1.02080366
0.00000000 0.01228908 0.03272780 0.07102209 0.28691799 0.58808457 0.95652878 0.99842756 1.00749140 1.01385610 1.01970353
0.00000000 0.01324406 0.03481869 0.07268172 0.28767074 0.58832966 0.95417667 0.99620548 1.00551410 1.01211905 1.01819968
0.00000000 0.01309323 0.03665487 0.07432534 0.28841192 0.58857190 0.95169598 0.99386213 1.00342739 1.01028298 1.01660629
0.00000000 0.01231748 0.03816207 0.07594545 0.28913972 0.58880504 0.94915648 0.99146662 1.00129691 1.00840983 1.01498147
0.00000000 0.01166077 0.03931997 0.07748105 0.28982356 0.58900715 0.94658604 0.98904571 0.99914554 1.00651797 1.01333869
0.00000000 0.01130893 0.04025079 0.07887031 0.29042310 0.58915308 0.94378242 0.98638512 0.99675530 1.00438600 1.01145319
0.00000000 0.01063420 0.04084161 0.08656611 0.29095141 0.59053305 0.94077768 0.98351903 0.99416283 1.00205400 1.00937126
0.00000000 0.01000889 0.04113839 0.09298499 0.29667274 0.59166728 0.93780934 0.98068405 0.99160905 0.99976447 1.00732601
0.00000000 0.00920049 0.04122624 0.09797165 0.30176938 0.59254639 0.93508554 0.97810903 0.98931914 0.99773863 1.00553992
0.00000000 0.00907046 0.04127286 0.10104602 0.30620339 0.59309675 0.93255982 0.97574634 0.98724205 0.99592251 1.00395911
0.00000000 0.00947674 0.04161626 0.10167652 0.30991493 0.59310664 0.93017384 0.97353256 0.98531283 0.99425074 1.00251826
0.00000000 0.00974603 0.04208586 0.10232548 0.31277202 0.59299438 0.92794850 0.97149368 0.98355996 0.99275421 1.00125070
0.00000000 0.01015822 0.04254661 0.10291282 0.31430787 0.59283553 0.92540058 0.96912339 0.98147741 0.99092844 0.99965319
0.00000000 0.00977829 0.04268000 0.10336617 0.31422243 0.59261183 0.92272506 0.96663283 0.97927950 0.98898892 0.99794192
0.00000000 0.00952593 0.04268647 0.10786437 0.31403770 0.59231717 0.91989598 0.96399002 0.97693766 0.98690529 0.99608465
0.00000000 0.00884430 0.04246573 0.11046973 0.31377655 0.59480798 0.91731570 0.96161427 0.97487520 0.98509927 0.99450139
0.00000000 0.00833537 0.04206798 0.11044921 0.31342312 0.59711226 0.91478224 0.95929219 0.97286852 0.98334781 0.99296976
0.00000000 0.00825413 0.04144893 0.11017349 0.31295019 0.59916977 0.91203084 0.95674426 0.97063801 0.98137118 0.99120984
0.00000000 0.00778926 0.04060366 0.10966046 0.31231755 0.60171661 0.90941287 0.95435164 0.96856628 0.97955141 0.98960236
0.00000000 0.00708958 0.03947619 0.10894814 0.31154366 0.60406877 0.90686653 0.95204511 0.96658535 0.97782259 0.98808378
0.00000000 0.00718064 0.03859989 0.10823004 0.31071076 0.60634159 0.90475179 0.95019841 0.96506472 0.97655149 0.98701895
0.00000000 0.00888404 0.03843832 0.10757040 0.30983557 0.60843071 0.90258548 0.94829807 0.96349046 0.97522484 0.98589578
0.00000000 0.01029843 0.03904415 0.10700833 0.30892517 0.61038021 0.90052356 0.94651839 0.96204353 0.97402940 0.98490673
0.00000000 0.01032403 0.03985052 0.10660124 0.30802707 0.61220158 0.89849408 0.94478753 0.96065799 0.97290572 0.98399926
0.00000000 0.01094879 0.04082908 0.10631346 0.30713531 0.61383517 0.89622582 0.94281549 0.95904150 0.97155960 0.98287746
0.00000000 0.01120296 0.04198053 0.10616349 0.30625339 0.61532525 0.89391756 0.94080980 0.95739840 0.97019224 0.98173928
0.00000000 0.01157327 0.04321073 0.10615404 0.30538536 0.61664830 0.89144181 0.93863209 0.95558789 0.96866096 0.98044033
0.00000000 0.01219275 0.04461230 0.10621119 0.30449339 0.61778071 0.88875423 0.93623670 0.95356324 0.96691736 0.97893019
0.00000000 0.01274463 0.04599752 0.11061290 0.30355972 0.61875440 0.88605064 0.93384446 0.95154693 0.96518351 0.97742985
0.00000000 0.01317278 0.05237131 0.11352821 0.30261780 0.61957725 0.88329584 0.93140934 0.94949305 0.96341514 0.97589725
0.00000000 0.01346983 0.05668158 0.11399316 0.30675121 0.62025025 0.88045260 0.92889548 0.94736707 0.96157862 0.97429957
0.00000000 0.01380448 0.05879482 0.11392637 0.31029036 0.62099399 0.87757727 0.92636971 0.94523572 0.95974008 0.97270202
0.00000000 0.01373645 0.05836889 0.11381689 0.31316656 0.62155703 0.87450900 0.92365941 0.94292721 0.95772822 0.97093374
0.00000000 0.01180930 0.05680457 0.11913667 0.31525951 0.62192056 0.87120558 0.92075924 0.94045566 0.95557197 0.96903736
0.00000000 0.00929220 0.05822273 0.12464427 0.31764280 0.62202398 0.86781326 0.91780898 0.93794980 0.95338728 0.96711413
0.00000000 0.01027163 0.05722213 0.12872238 0.31925474 0.62190642 0.86439474 0.91486222 0.93545363 0.95121173 0.96519622
0.00000000 0.00995289 0.05437815 0.13175059 0.32021663 0.62209455 0.86114195 0.91209160 0.93312881 0.94920044 0.96343391
0.00000000 0.00949056 0.05139494 0.13384636 0.32050658 0.62216105 0.85792397 0.90934518 0.93081927 0.94719602 0.96166977
0.00000000 0.00948326 0.04926142 0.13740301 0.31981477 0.62201963 0.85451547 0.90640359 0.92831123 0.94498752 0.95969464
0.00000000 0.00944184 0.04734325 0.13977095 0.31752994 0.62208835 0.85106439 0.90345266 0.92579470 0.94276740 0.95770290
0.00000000 0.00955679 0.04600171 0.14105748 0.31485115 0.62194496 0.84742176 0.90031753 0.92309395 0.94036052 0.95552073
0.00000000 0.00927994 0.04466171 0.14099782 0.31206874 0.62164463 0.84380725 0.89724370 0.92045700 0.93801628 0.95339851
0.00000000 0.00886667 0.04364779 0.13939689 0.30925168 0.62128189 0.84053974 0.89452919 0.91817981 0.93603013 0.95163179
0.00000000 0.00874409 0.04265221 0.13564911 0.30632031 0.62076024 0.83732376 0.89187363 0.91596322 0.93410311 0.94992135
0.00000000 0.00854468 0.04159431 0.13186279 0.30326789 0.62007598 0.83413468 0.88925468 0.91378636 0.93221562 0.94824883
0.00000000 0.00839315 0.04073900 0.12816104 0.30013438 0.61928891 0.83118061 0.88687941 0.91185320 0.93056948 0.94681418
0.00000000 0.00872880 0.04032670 0.12468435 0.29698282 0.61841588 0.82842111 0.88470042 0.91011342 0.92911318 0.94556543
0.00000000 0.00931297 0.04064156 0.12160691 0.29389480 0.61749462 0.82588173 0.88273546 0.90858080 0.92785861 0.94451353
0.00000000 0.01002593 0.04156041 0.11895954 0.29089550 0.61654277 0.82358635 0.88101044 0.90728224 0.92683388 0.94368802
0.00000000 0.01095944 0.04289751 0.11669028 0.28796945 0.61550317 0.82128184 0.87926784 0.90596009 0.92578128 0.94283124
0.00000000 0.01177969 0.04450121 0.11474307 0.28510024 0.61434701 0.81884184 0.87738083 0.90448856 0.92457585 0.94181900
0.00000000 0.01219237 0.04587600 0.11292716 0.28221828 0.61304374 0.81622085 0.87531415 0.90283801 0.92319143 0.94062797
0.00000000 0.01238696 0.04699819 0.11113365 0.27928085 0.61161368 0.81358276 0.87324483 0.90119049 0.92181323 0.93944579
0.00000000 0.01158221 0.04730554 0.10916060 0.27620090 0.61002349 0.81092864 0.87118040 0.89955589 0.92045153 0.93828218
0.00000000 0.00949496 0.04607528 0.10673112 0.27286416 0.60822862 0.80825598 0.86912703 0.89794388 0.91911705 0.93714747
0.00000000 0.00862394 0.04397526 0.10395093 0.26932443 0.60625221 0.80558105 0.86709463 0.89636102 0.91781457 0.93604541
0.00000000 0.00934535 0.04272498 0.10131697 0.26578284 0.60414464 0.80276464 0.86491133 0.89462133 0.91635055 0.93477749
0.00000000 0.01101273 0.04257651 0.09914957 0.26237921 0.60218298 0.79996468 0.86272513 0.89286793 0.91486476 0.93348177
0.00000000 0.01071392 0.04293283 0.10287791 0.25909060 0.60018767 0.79728021 0.86064843 0.89121699 0.91347708 0.93228021
0.00000000 0.01096138 0.04342910 0.10546700 0.25583296 0.59811202 0.79464231 0.85861753 0.88960926 0.91213066 0.93111841
0.00000000 0.01106714 0.04400008 0.10692449 0.25266356 0.59598681 0.79202308 0.85660491 0.88801892 0.91080219 0.92997637
0.00000000 0.01121464 0.04470868 0.10700238 0.24962105 0.59381989 0.78933321 0.85451529 0.88634915 0.90939430 0.92875685
0.00000000 0.01062856 0.04502402 0.10981930 0.24656335 0.59151251 0.78631312 0.85209869 0.88435299 0.90766002 0.92721120
0.00000000 0.00961952 0.04435206 0.11122534 0.24887811 0.59006924 0.78348462 0.84989286 0.88256799 0.90613486 0.92587113
0.00000000 0.00945552 0.04404199 0.11162839 0.25081534 0.58867232 0.78099468 0.84800460 0.88108906 0.90490841 0.92482343
0.00000000 0.00972708 0.04396251 0.11030655 0.25228787 0.58721128 0.77840231 0.84598581 0.87946617 0.90352952 0.92361645
0.00000000 0.01009864 0.04422367 0.10769008 0.25321268 0.58562547 0.77555781 0.84369036 0.87755543 0.90185530 0.92210785
0.00000000 0.01009314 0.04437081 0.11554658 0.25362931 0.58403124 0.77287105 0.84154101 0.87578153 0.90031098 0.92072272
0.00000000 0.01061144 0.04489572 0.12248516 0.25355391 0.58244955 0.77036105 0.83954660 0.87415098 0.89890324 0.91946904
0.00000000 0.01055715 0.04546734 0.12841606 0.25281306 0.58082774 0.76788518 0.83756980 0.87252940 0.89749928 0.91821513
0.00000000 0.01077533 0.04591192 0.13346849 0.25117128 0.57921750 0.76558504 0.83575589 0.87106359 0.89624684 0.91710967
0.00000000 0.01093368 0.04622482 0.13746664 0.24802684 0.57751137 0.76316164 0.83381303 0.86946569 0.89486065 0.91586971
0.00000000 0.01125150 0.04617120 0.14037541 0.24470455 0.57599418 0.76070776 0.83184238 0.86783879 0.89344337 0.91459604
0.00000000 0.01165407 0.04643782 0.14257879 0.24492258 0.57462391 0.75825508 0.82985982 0.86619236 0.89200238 0.91329606
0.00000000 0.01215244 0.04690391 0.14424499 0.24459988 0.57337209 0.75596548 0.82802655 0.86468741 0.89069959 0.91213311
0.00000000 0.01112301 0.04759914 0.14562323 0.24368144 0.57224821 0.75399483 0.82648729 0.86346567 0.88967621 0.91124896
0.00000000 0.01153605 0.04840212 0.14655373 0.24148325 0.57115204 0.75206159 0.82495687 0.86223952 0.88864218 0.91035096
0.00000000 0.01199231 0.04917641 0.14685434 0.23877826 0.57007295 0.75027260 0.82355276 0.86113057 0.88772069 0.90956267
0.00000000 0.01246079 0.04997740 0.14647135 0.23618304 0.56896690 0.74846193 0.82210637 0.85996899 0.88674111 0.90871286
0.00000000 0.01264804 0.05091029 0.14532327 0.23369813 0.56780880 0.74650946 0.82049500 0.85863122 0.88557959 0.90767756
0.00000000 0.01258379 0.05441814 0.14328899 0.23421265 0.56667836 0.74463195 0.81893822 0.85733834 0.88445779 0.90667886
0.00000000 0.01235489 0.05534144 0.13972834 0.23407167 0.56565767 0.74288102 0.81747813 0.85612824 0.88341238 0.90575329
0.00000000 0.01164285 0.05491856 0.13617572 0.23259977 0.56471888 0.74137763 0.81624341 0.85513266 0.88257661 0.90503470
0.00000000 0.01123516 0.05451986 0.13302500 0.23058182 0.56384944 0.74014857 0.81526289 0.85438087 0.88197941 0.90455118
0.00000000 0.01170028 0.05448572 0.13030396 0.22869710 0.56300673 0.73901417 0.81434785 0.85367937 0.88142411 0.90410327
0.00000000 0.01203744 0.05446314 0.12779524 0.22686986 0.56211129 0.73775249 0.81328422 0.85281770 0.88070204 0.90348370
0.00000000 0.01252174 0.05468255 0.12540825 0.22503684 0.56114115 0.73637605 0.81208989 0.85181595 0.87983386 0.90271318
0.00000000 0.01204216 0.05448324 0.12308703 0.22316631 0.56005171 0.73475061 0.81063556 0.85054767 0.87869399 0.90166587
0.00000000 0.01208405 0.05370577 0.12061848 0.22122137 0.55905380 0.73292378 0.80898109 0.84907741 0.87734996 0.90041216
0.00000000 0.01208114 0.05327149 0.11836815 0.22423237 0.55872348 0.73089307 0.80710407 0.84737466 0.87576801 0.89891706
0.00000000 0.01319262 0.05252537 0.12250094 0.22953053 0.55861679 0.72903691 0.80538638 0.84582401 0.87433412 0.89756711
0.00000000 0.01267271 0.05176979 0.12568715 0.23444761 0.55857746 0.72739141 0.80386039 0.84445719 0.87308043 0.89639532
0.00000000 0.01197670 0.05108469 0.12799218 0.23901409 0.55862137 0.72598290 0.80254962 0.84329613 0.87202794 0.89542183
0.00000000 0.01166676 0.05061309 0.12940604 0.24325420 0.55878543 0.72493025 0.80157501 0.84246187 0.87129756 0.89476713
0.00000000 0.01114004 0.05051888 0.12990732 0.24719995 0.55907267 0.72419066 0.80088878 0.84190402 0.87083763 0.89437872
0.00000000 0.01066224 0.05050459 0.12884951 0.25078674 0.55943146 0.72365713 0.80038653 0.84151884 0.87054413 0.89415209
0.00000000 0.01048867 0.04997535 0.12596258 0.25381926 0.55973346 0.72311930 0.79987140 0.84111503 0.87022787 0.89389862
0.00000000 0.01034259 0.04870579 0.12280240 0.25616968 0.55989564 0.72244729 0.79922364 0.84057724 0.86977524 0.89350557
0.00000000 0.01042042 0.04760759 0.11972072 0.25800032 0.56001689 0.72175318 0.79854525 0.84000367 0.86928401 0.89307200
0.00000000 0.01020977 0.04682758 0.11684544 0.25936290 0.56011773 0.72100222 0.79779749 0.83935448 0.86871472 0.89255987
0.00000000 0.00997750 0.04623790 0.11426726 0.26029607 0.56024336 0.72027949 0.79705810 0.83870416 0.86814010 0.89204051
0.00000000 0.00985172 0.04591486 0.11203173 0.26079978 0.56041844 0.71961863 0.79635680 0.83808048 0.86758699 0.89154019
0.00000000 0.00914207 0.04518968 0.10984937 0.26068750 0.56064748 0.71918181 0.79587236 0.83766928 0.86724446 0.89124940
0.00000000 0.00926866 0.04422417 0.10762815 0.25971859 0.56085431 0.71879260 0.79542758 0.83729231 0.86693295 0.89098708
0.00000000 0.00910520 0.04321439 0.10537650 0.25726366 0.56105401 0.71850711 0.79508142 0.83700980 0.86671352 0.89081495
0.00000000 0.00927524 0.04252770 0.10330979 0.25446793 0.56127338 0.71828874 0.79478725 0.83677096 0.86653378 0.89068041
0.00000000 0.00925490 0.04224016 0.10154172 0.25185422 0.56154040 0.71814275 0.79454461 0.83657282 0.86638996 0.89057953
0.00000000 0.00939124 0.04200688 0.09991804 0.24935894 0.56182896 0.71805817 0.79434933 0.83641413 0.86628187 0.89051251
0.00000000 0.01015442 0.04214713 0.09844737 0.24698280 0.56208840 0.71786219 0.79402427 0.83611573 0.86602911 0.89029808
0.00000000 0.01025543 0.04251032 0.09712582 0.24472759 0.56227081 0.71737388 0.79338437 0.83549141 0.86544501 0.88974961
0.00000000 0.00952018 0.04249987 0.09596817 0.24261172 0.56245083 0.71680064 0.79264158 0.83475850 0.86474923 0.88908751
0.00000000 0.01096606 0.04229916 0.10130047 0.24063930 0.56260462 0.71606858 0.79172182 0.83383906 0.86386228 0.88823180
0.00000000 0.01017264 0.05051008 0.10539379 0.23872201 0.56289561 0.71548436 0.79094797 0.83306282 0.86311697 0.88751650
0.00000000 0.00894057 0.05541205 0.10822151 0.23680046 0.56318613 0.71503111 0.79030528 0.83241685 0.86250159 0.88693104
0.00000000 0.00784700 0.05822949 0.10984985 0.23491124 0.56349576 0.71472685 0.78980613 0.83191055 0.86202396 0.88648196
0.00000000 0.00749289 0.05982468 0.11024628 0.23310944 0.56388083 0.71468400 0.78955957 0.83165139 0.86179092 0.88627603
0.00000000 0.00754134 0.06064872 0.10864321 0.23142520 0.56435304 0.71489318 0.78955317 0.83162524 0.86178762 0.88629801
0.00000000 0.00798910 0.06108043 0.10642898 0.22990280 0.56486475 0.71511882 0.78954090 0.83158124 0.86176051 0.88629263
0.00000000 0.00789571 0.06074573 0.10434079 0.22844613 0.56530015 0.71507718 0.78924234 0.83124044 0.86143057 0.88598026
0.00000000 0.00746685 0.05967516 0.10224321 0.22699433 0.56562816 0.71473216 0.78862674 0.83057489 0.86077121 0.88533502
0.00000000 0.00738355 0.06058566 0.10028707 0.22907376 0.56599448 0.71416803 0.78777719 0.82966796 0.85986529 0.88443884
0.00000000 0.00963418 0.06035863 0.09830091 0.23048635 0.56641806 0.71382423 0.78714718 0.82897803 0.85917448 0.88375593
0.00000000 0.00928589 0.05956911 0.09641579 0.23109798 0.56690759 0.71368906 0.78671892 0.82848560 0.85867932 0.88326783
0.00000000 0.00887941 0.05856632 0.09477005 0.23032928 0.56751778 0.71387603 0.78660169 0.82829788 0.85848633 0.88308088
0.00000000 0.00836692 0.05689641 0.09315372 0.22900968 0.56805728 0.71383616 0.78624279 0.82786005 0.85803820 0.88263519
0.00000000 0.00753102 0.05456738 0.09144761 0.22766444 0.56840884 0.71325930 0.78533230 0.82686252 0.85702466 0.88161950
0.00000000 0.00594212 0.05823701 0.08967347 0.22631335 0.56891741 0.71239891 0.78413200 0.82557081 0.85571295 0.88030143
0.00000000 0.00929076 0.06020070 0.08776551 0.22494162 0.57016614 0.71198217 0.78338521 0.82473554 0.85485870 0.87944105
0.00000000 0.00892168 0.06131661 0.08592112 0.22361389 0.57159758 0.71213656 0.78321218 0.82447542 0.85458130 0.87915927
0.00000000 0.00864355 0.06182078 0.08422355 0.22238851 0.57316124 0.71265517 0.78339796 0.82457159 0.85465985 0.87923418
0.00000000 0.00815268 0.06207127 0.08279277 0.22131876 0.57484949 0.71345922 0.78385474 0.82493165 0.85499931 0.87956866
0.00000000 0.00752960 0.06171784 0.08143783 0.22032489 0.57654043 0.71429077 0.78432530 0.82529778 0.85534017 0.87990099
0.00000000 0.00743268 0.06084068 0.08006130 0.21934642 0.57813121 0.71492935 0.78458795 0.82544694 0.85545747 0.88000396
0.00000000 0.00726111 0.05969835 0.07870187 0.21838914 0.57970850 0.71561060 0.78488581 0.82562605 0.85560087 0.88012966
0.00000000 0.00659070 0.05804281 0.07734068 0.21745900 0.58112429 0.71588823 0.78476568 0.82537961 0.85531405 0.87982191
0.00000000 0.00499834 0.05576206 0.07602060 0.21659652 0.58245954 0.71594225 0.78440717 0.82488796 0.85477843 0.87926341
0.00000000 0.00280014 0.05297534 0.07471730 0.21578947 0.58393706 0.71643995 0.78449040 0.82483612 0.85468151 0.87914262
0.00000000 0.00232098 0.04967743 0.07338445 0.21500525 0.58558930 0.71752275 0.78516030 0.82536883 0.85516677 0.87960100
0.00000000 0.00194724 0.04573552 0.07204695 0.21423940 0.58728431 0.71880975 0.78602525 0.82608853 0.85583222 0.88023270
0.00000000 0.00251306 0.04065962 0.07069239 0.21347145 0.58890148 0.71997685 0.78675668 0.82666378 0.85634405 0.88070201
0.00000000 0.00222903 0.03519398 0.06941912 0.21275074 0.59052958 0.72121264 0.78754753 0.82729097 0.85690221 0.88121268
0.00000000 0.00185005 0.03049525 0.06810297 0.21204420 0.59216372 0.72253489 0.78842290 0.82799884 0.85753770 0.88179760
0.00000000 0.00265876 0.02693939 0.06681302 0.21136219 0.59377090 0.72384521 0.78927979 0.82868137 0.85814223 0.88234652
0.00000000 0.00247554 0.02445241 0.06577546 0.21080899 0.59555230 0.72561724 0.79059738 0.82982166 0.85920321 0.88335143
0.00000000 0.00193908 0.02229418 0.06488755 0.21037302 0.59729053 0.72718918 0.79170221 0.83074190 0.86004045 0.88413087
0.00000000 0.00240025 0.02049302 0.06397188 0.20995505 0.59889018 0.72840323 0.79243590 0.83128155 0.86048979 0.88451622
0.00000000 0.00212379 0.01876335 0.06301939 0.20954229 0.60032788 0.72919185 0.79272937 0.83137158 0.86048234 0.88443873
0.00000000 0.00208941 0.01730515 0.06207102 0.20915285 0.60171023 0.72987188 0.79290511 0.83133694 0.86034464 0.88422619
0.00000000 0.00186801 0.01605465 0.06112575 0.20878317 0.60303697 0.73044297 0.79296342 0.83117847 0.86007795 0.88388020
0.00000000 0.00198866 0.01510124 0.06013049 0.20840438 0.60428371 0.73086415 0.79286694 0.83086030 0.85964790 0.88336713
0.00000000 0.00148315 0.01413091 0.05925484 0.20810314 0.60601497 0.73192182 0.79341260 0.83118798 0.85986479 0.88350141
0.00000000 0.00094459 0.01320913 0.05849263 0.20788957 0.60792376 0.73349584 0.79447714 0.83203283 0.86059763 0.88415080
0.00000000 0.00068835 0.01215030 0.05765493 0.20767211 0.60965477 0.73462992 0.79508824 0.83241488 0.86085973 0.88432235
0.00000000 0.00091918 0.01113011 0.05671804 0.20741661 0.61123261 0.73544324 0.79536756 0.83245600 0.86077217 0.88413585
0.00000000 0.00025581 0.01007937 0.05580692 0.20718847 0.61291951 0.73664920 0.79604039 0.83288687 0.86107020 0.88433070
0.00000000 0.00012732 0.00908820 0.05486982 0.20696464 0.61485908 0.73872507 0.79759790 0.83420252 0.86225051 0.88540414
0.00000000 0.00000000 0.00810325 0.05393721 0.20675753 0.61698998 0.74146423 0.79982877 0.83618916 0.86409767 0.88713952
0.00000000 0.00000000 0.00714440 0.05301058 0.20656931 0.61910169 0.74421138 0.80206260 0.83816986 0.86593034 0.88885223
0.00000000 0.00000000 0.00622683 0.05202282 0.20635803 0.62111371 0.74676926 0.80410047 0.83994449 0.86754677 0.89033877
0.00000000 0.00000000 0.00541607 0.05099352 0.20612723 0.62302212 0.74911878 0.80592594 0.84149914 0.86893543 0.89159010
0.00000000 0.00000000 0.00470831 0.04996428 0.20590087 0.62477362 0.75105290 0.80733049 0.84262745 0.86989300 0.89240659
0.00000000 0.00000000 0.00407997 0.04896370 0.20569850 0.62637225 0.75255369 0.80829703 0.84331482 0.87040766 0.89277941
0.00000000 0.00000000 0.00357398 0.04804122 0.20554777 0.62803040 0.75427937 0.80949582 0.84423587 0.87115698 0.89338824
0.00000000 0.00000000 0.00311920 0.04721094 0.20546056 0.62980290 0.75639490 0.81109448 0.84555887 0.87230953 0.89440180
0.00000000 0.00000000 0.00258077 0.04639917 0.20540565 0.63160246 0.75865543 0.81284365 0.84703162 0.87361042 0.89556248
0.00000000 0.00000000 0.00197270 0.04555665 0.20535198 0.63351683 0.76140467 0.81509461 0.84900617 0.87541073 0.89721945
0.00000000 0.00000000 0.00138063 0.04469577 0.20530042 0.63545709 0.76434746 0.81754645 0.85117920 0.87740561 0.89906687
0.00000000 0.00000000 0.00092763 0.04388410 0.20527803 0.63740133 0.76737375 0.82008618 0.85343740 0.87948233 0.90099306
0.00000000 0.00000000 0.00055169 0.04311652 0.20528772 0.63933997 0.77044684 0.82267981 0.85574927 0.88161178 0.90297133
0.00000000 0.00000000 0.00018415 0.04236141 0.20531627 0.64121767 0.77339052 0.82515037 0.85793864 0.88361868 0.90482743
0.00000000 0.00000000 0.00000000 0.04162503 0.20536799 0.64299334 0.77605111 0.82734165 0.85984953 0.88534780 0.90640718
0.00000000 0.00000000 0.00000000 0.04094125 0.20545719 0.64466263 0.77839030 0.82921325 0.86144153 0.88675918 0.90767129
0.00000000 0.00000000 0.00000000 0.04031970 0.20559336 0.64622320 0.78037871 0.83073501 0.86268544 0.88782487 0.90859319
0.00000000 0.00000000 0.00000000 0.03972576 0.20575904 0.64773365 0.78226057 0.83215669 0.86383248 0.88879635 0.90942399
0.00000000 0.00000000 0.00000000 0.03918016 0.20596418 0.64928491 0.78435873 0.83380738 0.86521388 0.89000617 0.91049703
0.00000000 0.00000000 0.00000000 0.03865854 0.20619784 0.65079342 0.78638031 0.83538915 0.86653002 0.89115363 0.91151092
0.00000000 0.00000000 0.00000000 0.03818489 0.20646608 0.65231303 0.78852190 0.83710328 0.86798409 0.89244330 0.91267127
0.00000000 0.00000000 0.00000000 0.03777127 0.20678113 0.65383464 0.79072652 0.83889383 0.86952200 0.89382321 0.91392842
0.00000000 0.00000000 0.00000000 0.03741448 0.20714416 0.65536956 0.79303946 0.84080674 0.87118971 0.89533923 0.91532802
0.00000000 0.00000000 0.00000000 0.03710772 0.20755241 0.65689619 0.79538312 0.84276178 0.87290558 0.89690851 0.91678614
0.00000000 0.00000000 0.00000000 0.03684437 0.20800280 0.65834630 0.79748617 0.84448015 0.87438797 0.89824758 0.91801787
0.00000000 0.00000000 0.00000000 0.03661426 0.20848803 0.65974243 0.79945647 0.84607011 0.87574443 0.89946283 0.91912820
0.00000000 0.00000000 0.00000000 0.03641753 0.20900750 0.66118678 0.80172967 0.84797535 0.87742025 0.90099977 0.92056205
0.00000000 0.00000000 0.00000000 0.03623594 0.20955454 0.66262756 0.80410832 0.84999221 0.87920841 0.90264869 0.92210730
0.00000000 0.00000000 0.00000000 0.03604005 0.21010810 0.66404800 0.80657721 0.85210261 0.88108745 0.90438455 0.92373513
0.00000000 0.00000000 0.00000000 0.03583525 0.21065900 0.66546188 0.80922915 0.85440047 0.88315042 0.90629906 0.92553569
0.00000000 0.00000000 0.00000000 0.03563924 0.21121758 0.66673644 0.81144030 0.85625001 0.88475972 0.90775503 0.92687349
0.00000000 0.00000000 0.00000000 0.03545234 0.21178625 0.66786434 0.81316149 0.85760077 0.88586550 0.90870343 0.92770048
0.00000000 0.00000000 0.00000000 0.03527361 0.21236304 0.66900506 0.81515038 0.85922593 0.88724482 0.90992263 0.92879490
0.00000000 0.00000000 0.00000000 0.03510257 0.21295210 0.67006596 0.81695824 0.86066704 0.88843668 0.91095079 0.92969493
0.00000000 0.00000000 0.00000000 0.03491692 0.21353904 0.67104617 0.81862209 0.86195923 0.88947389 0.91181805 0.93042789
0.00000000 0.00000000 0.00000000 0.03471365 0.21411400 0.67196255 0.82025888 0.86322077 0.89047388 0.91264046 0.93110822
0.00000000 0.00000000 0.00000000 0.03450801 0.21468155 0.67282873 0.82193312 0.86451936 0.89150620 0.91348926 0.93180871
0.00000000 0.00000000 0.00000000 0.03431577 0.21525397 0.67376849 0.82428793 0.86651497 0.89323650 0.91503366 0.93320102
0.00000000 0.00000000 0.00000000 0.03413507 0.21583772 0.67462462 0.82647643 0.86834387 0.89479747 0.91640575 0.93441835
0.00000000 0.00000000 0.00000000 0.03394051 0.21641796 0.67545945 0.82891405 0.87042730 0.89660902 0.91802257 0.93587391
0.00000000 0.00000000 0.00000000 0.03372908 0.21698530 0.67622471 0.83138204 0.87254035 0.89844302 0.91965337 0.93733479
0.00000000 0.00000000 0.00000000 0.03350862 0.21754070 0.67683665 0.83338121 0.87417420 0.89978946 0.92078863 0.93829292
0.00000000 0.00000000 0.00000000 0.03328979 0.21808917 0.67732354 0.83505874 0.87548130 0.90080427 0.92158727 0.93891000
0.00000000 0.00000000 0.00000000 0.03308204 0.21863571 0.67766590 0.83625784 0.87630332 0.90133099 0.92189523 0.93903470
0.00000000 0.00000000 0.00000000 0.03290217 0.21919537 0.67786639 0.83691255 0.87657430 0.90130655 0.92165287 0.93861106
0.00000000 0.00000000 0.00000000 0.03273932 0.22359775 0.67808285 0.83814132 0.87743477 0.90187456 0.92200344 0.93878002
0.00000000 0.00000000 0.00000000 0.03258643 0.22696011 0.67834110 0.84026688 0.87921427 0.90336120 0.92326879 0.93985799
0.00000000 0.00000000 0.00000000 0.03242879 0.22832877 0.67847244 0.84215783 0.88075593 0.90460510 0.92428586 0.94068252
0.00000000 0.00000000 0.00000000 0.03227629 0.22880795 0.67851912 0.84427018 0.88252830 0.90607793 0.92552822 0.94172814
0.00000000 0.00000000 0.00000000 0.03213689 0.22928885 0.67838395 0.84574785 0.88366036 0.90691095 0.92613161 0.94213693
0.00000000 0.00000000 0.00000000 0.03202414 0.22978122 0.67812718 0.84718339 0.88475842 0.90771353 0.92670713 0.94252049
0.00000000 0.00000000 0.00000000 0.03192231 0.23028143 0.67767906 0.84791852 0.88514829 0.90780958 0.92657856 0.94220380
0.00000000 0.00000000 0.00000000 0.03182358 0.23078128 0.67782879 0.84867670 0.88556437 0.90793112 0.92647518 0.94191112
0.00000000 0.00000000 0.00000000 0.03172838 0.23128218 0.67791714 0.84972452 0.88627833 0.90835077 0.92666799 0.94191207
0.00000000 0.00000000 0.00000000 0.03163196 0.23178003 0.67796271 0.85139816 0.88763476 0.90941237 0.92749861 0.94254595
0.00000000 0.00000000 0.00000000 0.03153676 0.23227476 0.67791390 0.85344294 0.88937563 0.91085816 0.92871047 0.94355762
0.00000000 0.00000000 0.00000000 0.03144496 0.23276657 0.67770036 0.85535987 0.89099169 0.91217851 0.92979548 0.94444109
0.00000000 0.00000000 0.00000000 0.03135983 0.23325760 0.67730160 0.85718071 0.89251714 0.91340928 0.93079102 0.94523522
0.00000000 0.00000000 0.00000000 0.03128064 0.23374680 0.67667175 0.85890884 0.89395546 0.91455381 0.93170029 0.94594306
0.00000000 0.00000000 0.00000000 0.03120621 0.23423252 0.67566653 0.86113495 0.89591193 0.91621793 0.93312735 0.94716625
0.00000000 0.00000000 0.00000000 0.03113863 0.23471469 0.67427351 0.86304143 0.89755305 0.91756824 0.93424206 0.94807877
0.00000000 0.00000000 0.00000000 0.03107734 0.23519260 0.67289999 0.86484046 0.89909519 0.91882129 0.93526033 0.94889568
0.00000000 0.00000000 0.00000000 0.03102195 0.23566619 0.67154533 0.86657640 0.90058307 0.92002180 0.93622672 0.94966129
0.00000000 0.00000000 0.00000000 0.03097209 0.23613548 0.67020934 0.86838822 0.90215869 0.92131206 0.93728322 0.95051719
0.00000000 0.00000000 0.00000000 0.03092823 0.23660088 0.66889217 0.87010332 0.90364569 0.92251598 0.93825476 0.95128944
0.00000000 0.00000000 0.00000000 0.03089122 0.23706320 0.66759379 0.87160081 0.90492028 0.92351034 0.93901910 0.95185695
0.00000000 0.00000000 0.00000000 0.03086016 0.23752177 0.66631313 0.87314188 0.90624879 0.92456132 0.93984128 0.95248331
0.00000000 0.00000000 0.00000000 0.03083585 0.23797733 0.66505143 0.87514459 0.90805992 0.92609843 0.94114991 0.95359576
0.00000000 0.00000000 0.00000000 0.03081815 0.23842987 0.66380981 0.87752477 0.91026869 0.92803673 0.94286046 0.95511021
0.00000000 0.00000000 0.00000000 0.03080688 0.23887923 0.66258875 0.88003216 0.91261961 0.93012067 0.94471824 0.95677313
0.00000000 0.00000000 0.00000000 0.03080283 0.23932624 0.66138836 0.88221397 0.91464928 0.93188704 0.94626206 0.95812586
0.00000000 0.00000000 0.00000000 0.03080445 0.23976996 0.66020646 0.88404235 0.91632713 0.93330464 0.94746024 0.95913628
0.00000000 0.00000000 0.00000000 0.03081291 0.24021174 0.65904353 0.88587207 0.91801654 0.93473807 0.94867715 0.96016814
0.00000000 0.00000000 0.00000000 0.03082631 0.24065020 0.65789712 0.88723529 0.91923618 0.93570436 0.94943020 0.96073970
0.00000000 0.00000000 0.00000000 0.03084405 0.24108587 0.65676712 0.88872525 0.92059334 0.93681174 0.95032614 0.96145557
0.00000000 0.00000000 0.00000000 0.03086563 0.24151782 0.65565395 0.89083680 0.92259543 0.93856768 0.95187046 0.96281869
0.00000000 0.00000000 0.00000000 0.03089328 0.24194722 0.65455795 0.89198152 0.92361676 0.93934698 0.95244489 0.96321953
0.00000000 0.00000000 0.00000000 0.03092757 0.24237472 0.65347758 0.89304975 0.92456678 0.94005912 0.95295543 0.96355960
0.00000000 0.00000000 0.00000000 0.03097088 0.24280306 0.65241606 0.89471818 0.92614123 0.94140207 0.95409947 0.96453486
0.00000000 0.00000000 0.00000000 0.03100937 0.24362134 0.65012849 0.89725906 0.92886073 0.94386848 0.95631245 0.96652736
0.00000000 0.00000000 0.00000000 0.03104786 0.24443962 0.64784091 0.89979994 0.93158022 0.94633489 0.95852543 0.96851987
0.00000000 0.00000000 0.00000000 0.03108636 0.24525790 0.64555334 0.90234083 0.93429972 0.94880130 0.96073840 0.97051238
0.00000000 0.00000000 0.00000000 0.03112485 0.24607618 0.64326576 0.90488171 0.93701921 0.95126772 0.96295138 0.97250488
0.00000000 0.00000000 0.00000000 0.03116334 0.24689446 0.64097819 0.90742259 0.93973871 0.95373413 0.96516436 0.97449739
0.00000000 0.00000000 0.00000000 0.03120183 0.24771274 0.63869061 0.90996347 0.94245820 0.95620054 0.96737733 0.97648989
0.00000000 0.00000000 0.00000000 0.03124032 0.24853103 0.63640303 0.91250435 0.94517770 0.95866695 0.96959031 0.97848240
0.00000000 0.00000000 0.00000000 0.03127882 0.24934931 0.63411546 0.91504523 0.94789719 0.96113336 0.97180329 0.98047490
0.00000000 0.00000000 0.00000000 0.03131731 0.25016759 0.63182788 0.91758611 0.95061669 0.96359977 0.97401626 0.98246741
0.00000000 0.00000000 0.00000000 0.03135580 0.25098587 0.62954031 0.92012699 0.95333618 0.96606618 0.97622924 0.98445992
0.00000000 0.00000000 0.00000000 0.03139429 0.25180415 0.62725273 0.92266787 0.95605568 0.96853259 0.97844222 0.98645242
0.00000000 0.00000000 0.00000000 0.03143279 0.25262243 0.62496516 0.92520875 0.95877517 0.97099900 0.98065519 0.98844493
0.00000000 0.00000000 0.00000000 0.03147128 0.25344071 0.62267758 0.92774963 0.96149466 0.97346541 0.98286817 0.99043743
0.00000000 0.00000000 0.00000000 0.03150977 0.25425900 0.62039001 0.93029051 0.96421416 0.97593182 0.98508115 0.99242994
0.00000000 0.00000000 0.00000000 0.03154826 0.25507728 0.61810243 0.93283139 0.96693365 0.97839823 0.98729412 0.99442244
0.00000000 0.00000000 0.00000000 0.03158676 0.25589556 0.61581485 0.93537227 0.96965315 0.98086464 0.98950710 0.99641495
0.00000000 0.00000000 0.00000000 0.03162525 0.25671384 0.61352728 0.93791315 0.97237264 0.98333105 0.99172008 0.99840746
0.00000000 0.00000000 0.00000000 0.03166374 0.25753212 0.61123970 0.94045403 0.97509214 0.98579746 0.99393305 1.00039996
0.00000000 0.00000000 0.00000000 0.03170223 0.25835040 0.60895213 0.94299492 0.97781163 0.98826387 0.99614603 1.00239247
0.00000000 0.00000000 0.00000000 0.03174072 0.25916868 0.60666455 0.94553580 0.98053113 0.99073028 0.99835901 1.00438497
0.00000000 0.00000000 0.00000000 0.03195075 0.25943600 0.60621904 0.94717646 0.98219768 0.99225968 0.99976383 1.00568873
0.00000000 0.00000000 0.00000000 0.03215739 0.25969959 0.60578135 0.94840079 0.98344045 0.99336935 1.00075319 1.00658149
0.00000000 0.00000000 0.00000000 0.03235689 0.25995504 0.60534671 0.94968187 0.98474280 0.99453859 1.00180108 1.00753119
0.00000000 0.00000000 0.00000000 0.03255838 0.26021318 0.60492407 0.95027472 0.98534448 0.99501626 1.00216765 1.00781034
0.00000000 0.00000000 0.00000000 0.03275753 0.26046852 0.60450674 0.95065411 0.98572874 0.99528048 1.00232456 1.00788348
0.00000000 0.00000000 0.00000000 0.03295124 0.26071762 0.60409193 0.95152203 0.98661718 0.99604927 1.00298423 1.00845638
0.00000000 0.00000000 0.00000000 0.03313659 0.26095712 0.60367736 0.95246598 0.98758232 0.99689308 1.00371627 1.00909847
0.00000000 0.00000000 0.00000000 0.03331944 0.26119387 0.60326881 0.95302832 0.98815715 0.99735064 1.00406656 1.00936345
0.00000000 0.00000000 0.00000000 0.03350025 0.26142811 0.60286512 0.95321904 0.98835078 0.99743095 1.00404403 1.00926018
0.00000000 0.00000000 0.00000000 0.03367882 0.26165971 0.60246609 0.95373443 0.98888160 0.99785141 1.00436293 1.00949870
0.00000000 0.00000000 0.00000000 0.03385201 0.26188905 0.60207240 0.95427779 0.98944378 0.99830646 1.00471895 1.00977639
0.00000000 0.00000000 0.00000000 0.03402244 0.26211566 0.60168361 0.95469336 0.98987636 0.99863527 1.00495186 1.00993388
0.00000000 0.00000000 0.00000000 0.03418588 0.26233458 0.60129464 0.95503691 0.99023223 0.99888652 1.00510606 1.01001127
0.00000000 0.00000000 0.00000000 0.03434318 0.26254627 0.60090553 0.95523436 0.99043500 0.99898426 1.00510633 1.00993413
0.00000000 0.00000000 0.00000000 0.03449840 0.26275544 0.60051986 0.95508155 0.99027716 0.99872500 1.00475379 1.00950856
0.00000000 0.00000000 0.00000000 0.03465169 0.26296215 0.60013689 0.95482740 0.99001515 0.99836471 1.00430326 1.00898779
0.00000000 0.00000000 0.00000000 0.03480274 0.26316600 0.59975675 0.95502423 0.99021967 0.99847294 1.00432135 1.00893465
0.00000000 0.00000000 0.00000000 0.03494780 0.26336268 0.59937658 0.95551816 0.99072918 0.99888494 1.00464060 1.00917924
0.00000000 0.00000000 0.00000000 0.03508681 0.26355221 0.59899586 0.95539558 0.99059918 0.99865743 1.00432194 1.00878820
0.00000000 0.00000000 0.00000000 0.03522396 0.26373937 0.59861917 0.95602061 0.99124373 0.99920636 1.00477875 1.00917009
0.00000000 0.00000000 0.00000000 0.03535943 0.26392422 0.59824855 0.95720156 0.99246650 1.00033570 1.00581582 1.01013089
0.00000000 0.00000000 0.00000000 0.03549320 0.26410678 0.59788442 0.95814685 0.99344942 1.00122821 1.00661937 1.01086154
0.00000000 0.00000000 0.00000000 0.03562498 0.26428687 0.59752646 0.95921449 0.99456243 1.00225339 1.00755726 1.01172766
0.00000000 0.00000000 0.00000000 0.03575515 0.26446476 0.59717512 0.96040026 0.99580134 1.00340697 1.00862517 1.01272493
0.00000000 0.00000000 0.00000000 0.03588374 0.26464048 0.59683071 0.96170132 0.99716344 1.00468618 1.00982027 1.01385045
0.00000000 0.00000000 0.00000000 0.03601035 0.26481411 0.59649354 0.96311100 0.99864200 1.00608425 1.01113578 1.01509743
0.00000000 0.00000000 0.00000000 0.03613190 0.26498592 0.59616371 0.96445241 1.00005383 1.00741808 1.01238927 1.01628445
0.00000000 0.00000000 0.00000000 0.03624493 0.26514754 0.59583376 0.96607024 1.00174866 1.00903025 1.01391512 1.01773716
0.00000000 0.00000000 0.00000000 0.03635509 0.26530567 0.59551037 0.96768126 1.00343976 1.01064003 1.01543948 1.01918902
0.00000000 0.00000000 0.00000000 0.03646985 0.26546885 0.59520112 0.96906140 1.00490228 1.01202986 1.01675275 1.02043870
0.00000000 0.00000000 0.00000000 0.03658344 0.26563013 0.59489878 0.97036996 1.00629403 1.01335123 1.01799965 1.02162394
0.00000000 0.00000000 0.00000000 0.03669126 0.26578440 0.59459891 0.97196490 1.00798157 1.01496619 1.01953658 1.02309491
0.00000000 0.00000000 0.00000000 0.03679568 0.26593454 0.59430440 0.97346078 1.00956832 1.01648085 1.02097360 1.02446632
0.00000000 0.00000000 0.00000000 0.03689878 0.26608282 0.59401709 0.97492518 1.01112598 1.01796868 1.02238573 1.02581455
0.00000000 0.00000000 0.00000000 0.03700066 0.26622931 0.59373683 0.97636338 1.01265985 1.01943489 1.02377809 1.02714467
0.00000000 0.00000000 0.00000000 0.03710135 0.26637404 0.59346315 0.97756399 1.01395028 1.02065995 1.02493205 1.02823926
0.00000000 0.00000000 0.00000000 0.03720088 0.26651690 0.59319481 0.97840609 1.01487058 1.02151686 1.02572078 1.02897191
0.00000000 0.00000000 0.00000000 0.03729402 0.26665287 0.59292694 0.97947290 1.01602107 1.02260148 1.02673364 1.02992452
0.00000000 0.00000000 0.00000000 0.03738108 0.26678345 0.59266149 0.98071172 1.01734897 1.02386225 1.02792048 1.03104846
0.00000000 0.00000000 0.00000000 0.03748431 0.26693365 0.59242203 0.98187933 1.01862432 1.02509020 1.02909390 1.03217808
0.00000000 0.00000000 0.00000000 0.03758534 0.26708071 0.59218670 0.98293454 1.01978313 1.02620189 1.03015142 1.03319213
0.00000000 0.00000000 0.00000000 0.03768280 0.26722387 0.59195444 0.98384183 1.02078763 1.02715906 1.03105451 1.03405180
0.00000000 0.00000000 0.00000000 0.03777708 0.26736329 0.59172491 0.98460834 1.02164502 1.02796903 1.03181060 1.03476469
0.00000000 0.00000000 0.00000000 0.03786802 0.26749879 0.59149743 0.98523547 1.02235618 1.02863249 1.03242020 1.03533111
0.00000000 0.00000000 0.00000000 0.03795576 0.26763060 0.59127171 0.98572974 1.02292772 1.02915623 1.03289027 1.03575821
0.00000000 0.00000000 0.00000000 0.03804041 0.26775878 0.59104739 0.98609207 1.02336035 1.02954098 1.03322164 1.03604688
0.00000000 0.00000000 0.00000000 0.03812237 0.26788355 0.59082419 0.98632459 1.02365615 1.02978898 1.03341671 1.03619969
0.00000000 0.00000000 0.00000000 0.03820095 0.26800453 0.59060076 0.98608808 1.02346154 1.02954655 1.03312299 1.03586600
0.00000000 0.00000000 0.00000000 0.03827734 0.26812254 0.59037664 0.98555006 1.02295042 1.02898816 1.03251501 1.03522004
0.00000000 0.00000000 0.00000000 0.03835137 0.26823752 0.59015071 0.98466020 1.02206963 1.02806061 1.03153974 1.03420907
0.00000000 0.00000000 0.00000000 0.03842361 0.26835024 0.58992404 0.98434591 1.02178421 1.02772875 1.03115826 1.03378874
0.00000000 0.00000000 0.00000000 0.03849450 0.26846115 0.58969873 0.98452643 1.02201213 1.02791101 1.03128970 1.03387905
0.00000000 0.00000000 0.00000000 0.03857671 0.26858467 0.58948918 0.98479199 1.02234077 1.02820688 1.03154704 1.03410709
0.00000000 0.00000000 0.00000000 0.03865874 0.26870747 0.58928404 0.98578054 1.02342265 1.02925728 1.03255722 1.03508474
0.00000000 0.00000000 0.00000000 0.03873939 0.26882850 0.58908393 0.98705756 1.02480621 1.03061004 1.03386912 1.03636276
0.00000000 0.00000000 0.00000000 0.03881841 0.26894758 0.58888866 0.98808661 1.02593293 1.03170653 1.03492611 1.03738748
0.00000000 0.00000000 0.00000000 0.03889528 0.26906428 0.58869661 0.98862143 1.02654514 1.03228878 1.03547101 1.03790297
0.00000000 0.00000000 0.00000000 0.03896998 0.26917861 0.58850657 0.98889588 1.02688525 1.03259919 1.03574526 1.03814930
0.00000000 0.00000000 0.00000000 0.03904254 0.26929059 0.58831824 0.98926306 1.02732075 1.03300510 1.03611470 1.03849012
0.00000000 0.00000000 0.00000000 0.03911298 0.26940024 0.58813127 0.98933311 1.02744537 1.03310036 1.03617489 1.03852346
0.00000000 0.00000000 0.00000000 0.03918132 0.26950756 0.58794466 0.98907215 1.02722308 1.03284895 1.03589001 1.03821375
0.00000000 0.00000000 0.00000000 0.03924759 0.26961255 0.58775805 0.98892137 1.02711325 1.03271008 1.03571732 1.03801548
0.00000000 0.00000000 0.00000000 0.03931178 0.26971522 0.58757119 0.98852236 1.02674234 1.03231034 1.03528501 1.03755914
0.00000000 0.00000000 0.00000000 0.03937391 0.26981557 0.58738356 0.98804852 1.02629073 1.03183002 1.03477262 1.03702316
0.00000000 0.00000000 0.00000000 0.03943399 0.26991357 0.58719528 0.98772341 1.02599160 1.03150220 1.03441222 1.03663820
0.00000000 0.00000000 0.00000000 0.03949201 0.27000923 0.58700640 0.98730594 1.02559380 1.03107585 1.03395383 1.03615582
0.00000000 0.00000000 0.00000000 0.03954798 0.27010252 0.58681643 0.98667903 1.02497496 1.03042860 1.03327567 1.03545501
0.00000000 0.00000000 0.00000000 0.03960186 0.27019342 0.58662556 0.98639839 1.02471484 1.03014001 1.03295473 1.03510917
0.00000000 0.00000000 0.00000000 0.03965362 0.27028189 0.58643496 0.98652166 1.02487463 1.03027129 1.03305194 1.03517885
0.00000000 0.00000000 0.00000000 0.03970325 0.27036789 0.58624586 0.98706076 1.02546790 1.03083605 1.03358083 1.03567748
0.00000000 0.00000000 0.00000000 0.03975068 0.27045137 0.58605852 0.98737730 1.02582884 1.03116858 1.03387850 1.03594623
0.00000000 0.00000000 0.00000000 0.03979586 0.27053227 0.58587242 0.98764572 1.02613915 1.03145054 1.03412588 1.03616492
0.00000000 0.00000000 0.00000000 0.03983870 0.27061052 0.58568719 0.98776814 1.02629646 1.03157960 1.03422108 1.03623229
0.00000000 0.00000000 0.00000000 0.03987909 0.27068600 0.58550210 0.98763579 1.02618673 1.03144174 1.03405059 1.03603558
0.00000000 0.00000000 0.00000000 0.03991692 0.27075861 0.58531690 0.98765816 1.02623746 1.03146440 1.03404002 1.03599775
0.00000000 0.00000000 0.00000000 0.03995203 0.27082819 0.58513120 0.98735341 1.02594533 1.03114434 1.03368833 1.03562091
0.00000000 0.00000000 0.00000000 0.03998492 0.27089497 0.58494412 0.98672842 1.02531686 1.03048821 1.03300231 1.03491196
0.00000000 0.00000000 0.00000000 0.04001447 0.27095802 0.58475434 0.98602923 1.02460834 1.02975190 1.03223636 1.03412334
0.00000000 0.00000000 0.00000000 0.04004090 0.27101767 0.58456293 0.98585069 1.02444246 1.02955844 1.03201122 1.03387232
0.00000000 0.00000000 0.00000000 0.04010371 0.27109087 0.58437852 0.98613289 1.02475557 1.02984305 1.03226160 1.03409348
0.00000000 0.00000000 0.00000000 0.04021038 0.27118117 0.58420341 0.98635792 1.02500694 1.03006531 1.03244973 1.03425271
0.00000000 0.00000000 0.00000000 0.04033610 0.27127812 0.58403337 0.98644763 1.02511737 1.03014775 1.03249993 1.03427613
0.00000000 0.00000000 0.00000000 0.04049176 0.27138624 0.58386993 0.98660491 1.02529794 1.03030087 1.03262130 1.03437109
0.00000000 0.00000000 0.00000000 0.04068953 0.27151032 0.58371490 0.98693771 1.02566036 1.03063526 1.03292295 1.03464509
0.00000000 0.00000000 0.00000000 0.04094724 0.27165692 0.58357135 0.98722659 1.02597526 1.03092177 1.03317707 1.03487214
0.00000000 0.00000000 0.00000000 0.04128537 0.27183400 0.58344396 0.98732044 1.02608724 1.03100796 1.03323491 1.03490751
0.00000000 0.00009010 0.00000000 0.04171443 0.27204490 0.58333647 0.98729478 1.02608059 1.03098317 1.03319036 1.03484938
0.00000000 0.00087646 0.00000000 0.04223263 0.27229064 0.58325431 0.98731902 1.02614186 1.03104227 1.03324547 1.03490645
0.00000000 0.00141059 0.00000000 0.04282832 0.27257612 0.58320443 0.98754870 1.02644083 1.03136136 1.03358169 1.03526506
0.00000000 0.00168541 0.00000000 0.04346514 0.27288449 0.58317745 0.98745402 1.02641986 1.03137923 1.03363639 1.03536204
0.00000000 0.00238819 0.00000000 0.04412872 0.27320949 0.58316837 0.98715267 1.02619982 1.03121472 1.03352577 1.03531062
0.00000000 0.00346631 0.00110048 0.04487278 0.27356615 0.58318377 0.98683194 1.02597500 1.03106155 1.03344244 1.03530206
0.00000000 0.00459965 0.00277293 0.04574477 0.27398227 0.58324330 0.98641874 1.02567640 1.03085896 1.03333447 1.03529351
0.00000000 0.00588150 0.00472189 0.04677288 0.27447545 0.58335801 0.98567110 1.02505156 1.03035663 1.03295509 1.03504230
0.00000000 0.00743607 0.00696764 0.04796477 0.27505125 0.58353146 0.98463322 1.02414583 1.02959989 1.03234941 1.03459322
0.00000000 0.00913240 0.00949771 0.04930705 0.27570507 0.58376340 0.98323324 1.02288407 1.02851394 1.03144312 1.03387245
0.00000000 0.01017700 0.01207830 0.05078200 0.27643708 0.58405642 0.98175533 1.02156469 1.02739820 1.03053515 1.03317777
0.00000000 0.01062943 0.01458271 0.05236536 0.27724163 0.58440498 0.98006635 1.02004171 1.02610097 1.02946879 1.03234769
0.00000000 0.01079055 0.01696167 0.05401540 0.27809868 0.58479277 0.97812091 1.01825978 1.02455943 1.02817385 1.03130455
0.00000000 0.01042438 0.01908512 0.05568964 0.27898635 0.58520279 0.97603459 1.01633445 1.02288354 1.02675385 1.03014506
0.00000000 0.00939751 0.02078583 0.05732726 0.27987593 0.58561439 0.97388965 1.01434747 1.02114975 1.02527925 1.02893318
0.00000000 0.00825423 0.02205170 0.05886302 0.28072987 0.58599963 0.97164916 1.01225395 1.01930589 1.02369023 1.02760128
0.00000000 0.00746241 0.02302812 0.06026866 0.28152080 0.58633779 0.96941268 1.01015498 1.01744850 1.02207789 1.02623462
0.00000000 0.00686829 0.02378080 0.06157014 0.28225239 0.58662935 0.96726331 1.00813758 1.01566424 1.02052831 1.02491862
0.00000000 0.00672610 0.02446042 0.06277741 0.28290764 0.58685480 0.96531533 1.00631321 1.01405585 1.01913503 1.02373738
0.00000000 0.00698218 0.02521887 0.06396593 0.28353497 0.58705253 0.96370272 1.00483633 1.01279118 1.01807895 1.02288508
0.00000000 0.00763883 0.02616725 0.06518681 0.28415805 0.58723877 0.96243026 1.00371645 1.01188386 1.01737807 1.02238422
0.00000000 0.00863275 0.02738974 0.06648510 0.28479793 0.58742746 0.96133175 1.00278179 1.01116459 1.01686662 1.02207322
0.00000000 0.00982212 0.02894412 0.06788877 0.28546802 0.58762822 0.96003687 1.00164496 1.01024742 1.01616204 1.02157379
0.00000000 0.01090005 0.03070938 0.06940309 0.28617515 0.58784730 0.95845608 1.00021445 1.00904359 1.01517871 1.02080366
0.00000000 0.01228908 0.03272780 0.07102209 0.28691799 0.58808457 0.95652878 0.99842756 1.00749140 1.01385610 1.01970353
0.00000000 0.01324406 0.03481869 0.07268172 0.28767074 0.58832966 0.95417667 0.99620548 1.00551410 1.01211905 1.01819968
0.00000000 0.01309323 0.03665487 0.07432534 0.28841192 0.58857190 0.95169598 0.99386213 1.00342739 1.01028298 1.01660629
0.00000000 0.01231748 0.03816207 0.07594545 0.28913972 0.58880504 0.94915648 0.99146662 1.00129691 1.00840983 1.01498147
0.00000000 0.01166077 0.03931997 0.07748105 0.28982356 0.58900715 0.94658604 0.98904571 0.99914554 1.00651797 1.01333869
0.00000000 0.01130893 0.04025079 0.07887031 0.29042310 0.58915308 0.94378242 0.98638512 0.99675530 1.00438600 1.01145319
0.00000000 0.01063420 0.04084161 0.08656611 0.29095141 0.59053305 0.94077768 0.98351903 0.99416283 1.00205400 1.00937126
0.00000000 0.01000889 0.04113839 0.09298499 0.29667274 0.59166728 0.93780934 0.98068405 0.99160905 0.99976447 1.00732601
0.00000000 0.00920049 0.04122624 0.09797165 0.30176938 0.59254639 0.93508554 0.97810903 0.98931914 0.99773863 1.00553992
0.00000000 0.00907046 0.04127286 0.10104602 0.30620339 0.59309675 0.93255982 0.97574634 0.98724205 0.99592251 1.00395911
0.00000000 0.00947674 0.04161626 0.10167652 0.30991493 0.59310664 0.93017384 0.97353256 0.98531283 0.99425074 1.00251826
0.00000000 0.00974603 0.04208586 0.10232548 0.31277202 0.59299438 0.92794850 0.97149368 0.98355996 0.99275421 1.00125070
0.00000000 0.01015822 0.04254661 0.10291282 0.31430787 0.59283553 0.92540058 0.96912339 0.98147741 0.99092844 0.99965319
0.00000000 0.00977829 0.04268000 0.10336617 0.31422243 0.59261183 0.92272506 0.96663283 0.97927950 0.98898892 0.99794192
0.00000000 0.00952593 0.04268647 0.10786437 0.31403770 0.59231717 0.91989598 0.96399002 0.97693766 0.98690529 0.99608465
0.00000000 0.00884430 0.04246573 0.11046973 0.31377655 0.59480798 0.91731570 0.96161427 0.97487520 0.98509927 0.99450139
0.00000000 0.00833537 0.04206798 0.11044921 0.31342312 0.59711226 0.91478224 0.95929219 0.97286852 0.98334781 0.99296976
0.00000000 0.00825413 0.04144893 0.11017349 0.31295019 0.59916977 0.91203084 0.95674426 0.97063801 0.98137118 0.99120984
0.00000000 0.00778926 0.04060366 0.10966046 0.31231755 0.60171661 0.90941287 0.95435164 0.96856628 0.97955141 0.98960236
0.00000000 0.00708958 0.03947619 0.10894814 0.31154366 0.60406877 0.90686653 0.95204511 0.96658535 0.97782259 0.98808378
0.00000000 0.00718064 0.03859989 0.10823004 0.31071076 0.60634159 0.90475179 0.95019841 0.96506472 0.97655149 0.98701895
0.00000000 0.00888404 0.03843832 0.10757040 0.30983557 0.60843071 0.90258548 0.94829807 0.96349046 0.97522484 0.98589578
0.00000000 0.01029843 0.03904415 0.10700833 0.30892517 0.61038021 0.90052356 0.94651839 0.96204353 0.97402940 0.98490673
0.00000000 0.01032403 0.03985052 0.10660124 0.30802707 0.61220158 0.89849408 0.94478753 0.96065799 0.97290572 0.98399926
0.00000000 0.01094879 0.04082908 0.10631346 0.30713531 0.61383517 0.89622582 0.94281549 0.95904150 0.97155960 0.98287746
0.00000000 0.01120296 0.04198053 0.10616349 0.30625339 0.61532525 0.89391756 0.94080980 0.95739840 0.97019224 0.98173928
0.00000000 0.01157327 0.04321073 0.10615404 0.30538536 0.61664830 0.89144181 0.93863209 0.95558789 0.96866096 0.98044033
0.00000000 0.01219275 0.04461230 0.10621119 0.30449339 0.61778071 0.88875423 0.93623670 0.95356324 0.96691736 0.97893019
0.00000000 0.01274463 0.04599752 0.11061290 0.30355972 0.61875440 0.88605064 0.93384446 0.95154693 0.96518351 0.97742985
0.00000000 0.01317278 0.05237131 0.11352821 0.30261780 0.61957725 0.88329584 0.93140934 0.94949305 0.96341514 0.97589725
0.00000000 0.01346983 0.05668158 0.11399316 0.30675121 0.62025025 0.88045260 0.92889548 0.94736707 0.96157862 0.97429957
0.00000000 0.01380448 0.05879482 0.11392637 0.31029036 0.62099399 0.87757727 0.92636971 0.94523572 0.95974008 0.97270202
0.00000000 0.01373645 0.05836889 0.11381689 0.31316656 0.62155703 0.87450900 0.92365941 0.94292721 0.95772822 0.97093374
0.00000000 0.01180930 0.05680457 0.11913667 0.31525951 0.62192056 0.87120558 0.92075924 0.94045566 0.95557197 0.96903736
0.00000000 0.00929220 0.05822273 0.12464427 0.31764280 0.62202398 0.86781326 0.91780898 0.93794980 0.95338728 0.96711413
0.00000000 0.01027163 0.05722213 0.12872238 0.31925474 0.62190642 0.86439474 0.91486222 0.93545363 0.95121173 0.96519622
0.00000000 0.00995289 0.05437815 0.13175059 0.32021663 0.62209455 0.86114195 0.91209160 0.93312881 0.94920044 0.96343391
0.00000000 0.00949056 0.05139494 0.13384636 0.32050658 0.62216105 0.85792397 0.90934518 0.93081927 0.94719602 0.96166977
0.00000000 0.00948326 0.04926142 0.13740301 0.31981477 0.62201963 0.85451547 0.90640359 0.92831123 0.94498752 0.95969464
0.00000000 0.00944184 0.04734325 0.13977095 0.31752994 0.62208835 0.85106439 0.90345266 0.92579470 0.94276740 0.95770290
0.00000000 0.00955679 0.04600171 0.14105748 0.31485115 0.62194496 0.84742176 0.90031753 0.92309395 0.94036052 0.95552073
0.00000000 0.00927994 0.04466171 0.14099782 0.31206874 0.62164463 0.84380725 0.89724370 0.92045700 0.93801628 0.95339851
0.00000000 0.00886667 0.04364779 0.13939689 0.30925168 0.62128189 0.84053974 0.89452919 0.91817981 0.93603013 0.95163179
0.00000000 0.00874409 0.04265221 0.13564911 0.30632031 0.62076024 0.83732376 0.89187363 0.91596322 0.93410311 0.94992135
0.00000000 0.00854468 0.04159431 0.13186279 0.30326789 0.62007598 0.83413468 0.88925468 0.91378636 0.93221562 0.94824883
0.00000000 0.00839315 0.04073900 0.12816104 0.30013438 0.61928891 0.83118061 0.88687941 0.91185320 0.93056948 0.94681418
0.00000000 0.00872880 0.04032670 0.12468435 0.29698282 0.61841588 0.82842111 0.88470042 0.91011342 0.92911318 0.94556543
0.00000000 0.00931297 0.04064156 0.12160691 0.29389480 0.61749462 0.82588173 0.88273546 0.90858080 0.92785861 0.94451353
0.00000000 0.01002593 0.04156041 0.11895954 0.29089550 0.61654277 0.82358635 0.88101044 0.90728224 0.92683388 0.94368802
0.00000000 0.01095944 0.04289751 0.11669028 0.28796945 0.61550317 0.82128184 0.87926784 0.90596009 0.92578128 0.94283124
0.00000000 0.01177969 0.04450121 0.11474307 0.28510024 0.61434701 0.81884184 0.87738083 0.90448856 0.92457585 0.94181900
0.00000000 0.01219237 0.04587600 0.11292716 0.28221828 0.61304374 0.81622085 0.87531415 0.90283801 0.92319143 0.94062797
0.00000000 0.01238696 0.04699819 0.11113365 0.27928085 0.61161368 0.81358276 0.87324483 0.90119049 0.92181323 0.93944579
0.00000000 0.01158221 0.04730554 0.10916060 0.27620090 0.61002349 0.81092864 0.87118040 0.89955589 0.92045153 0.93828218
0.00000000 0.00949496 0.04607528 0.10673112 0.27286416 0.60822862 0.80825598 0.86912703 0.89794388 0.91911705 0.93714747
0.00000000 0.00862394 0.04397526 0.10395093 0.26932443 0.60625221 0.80558105 0.86709463 0.89636102 0.91781457 0.93604541
0.00000000 0.00934535 0.04272498 0.10131697 0.26578284 0.60414464 0.80276464 0.86491133 0.89462133 0.91635055 0.93477749
0.00000000 0.01101273 0.04257651 0.09914957 0.26237921 0.60218298 0.79996468 0.86272513 0.89286793 0.91486476 0.93348177
0.00000000 0.01071392 0.04293283 0.10287791 0.25909060 0.60018767 0.79728021 0.86064843 0.89121699 0.91347708 0.93228021
0.00000000 0.01096138 0.04342910 0.10546700 0.25583296 0.59811202 0.79464231 0.85861753 0.88960926 0.91213066 0.93111841
0.00000000 0.01106714 0.04400008 0.10692449 0.25266356 0.59598681 0.79202308 0.85660491 0.88801892 0.91080219 0.92997637
0.00000000 0.01121464 0.04470868 0.10700238 0.24962105 0.59381989 0.78933321 0.85451529 0.88634915 0.90939430 0.92875685
0.00000000 0.01062856 0.04502402 0.10981930 0.24656335 0.59151251 0.78631312 0.85209869 0.88435299 0.90766002 0.92721120
0.00000000 0.00961952 0.04435206 0.11122534 0.24887811 0.59006924 0.78348462 0.84989286 0.88256799 0.90613486 0.92587113
0.00000000 0.00945552 0.04404199 0.11162839 0.25081534 0.58867232 0.78099468 0.84800460 0.88108906 0.90490841 0.92482343
0.00000000 0.00972708 0.04396251 0.11030655 0.25228787 0.58721128 0.77840231 0.84598581 0.87946617 0.90352952 0.92361645
0.00000000 0.01009864 0.04422367 0.10769008 0.25321268 0.58562547 0.77555781 0.84369036 0.87755543 0.90185530 0.92210785
0.00000000 0.01009314 0.04437081 0.11554658 0.25362931 0.58403124 0.77287105 0.84154101 0.87578153 0.90031098 0.92072272
0.00000000 0.01061144 0.04489572 0.12248516 0.25355391 0.58244955 0.77036105 0.83954660 0.87415098 0.89890324 0.91946904
0.00000000 0.01055715 0.04546734 0.12841606 0.25281306 0.58082774 0.76788518 0.83756980 0.87252940 0.89749928 0.91821513
0.00000000 0.01077533 0.04591192 0.13346849 0.25117128 0.57921750 0.76558504 0.83575589 0.87106359 0.89624684 0.91710967
0.00000000 0.01093368 0.04622482 0.13746664 0.24802684 0.57751137 0.76316164 0.83381303 0.86946569 0.89486065 0.91586971
0.00000000 0.01125150 0.04617120 0.14037541 0.24470455 0.57599418 0.76070776 0.83184238 0.86783879 0.89344337 0.91459604
0.00000000 0.01165407 0.04643782 0.14257879 0.24492258 0.57462391 0.75825508 0.82985982 0.86619236 0.89200238 0.91329606
0.00000000 0.01215244 0.04690391 0.14424499 0.24459988 0.57337209 0.75596548 0.82802655 0.86468741 0.89069959 0.91213311
0.00000000 0.01112301 0.04759914 0.14562323 0.24368144 0.57224821 0.75399483 0.82648729 0.86346567 0.88967621 0.91124896
0.00000000 0.01153605 0.04840212 0.14655373 0.24148325 0.57115204 0.75206159 0.82495687 0.86223952 0.88864218 0.91035096
0.00000000 0.01199231 0.04917641 0.14685434 0.23877826 0.57007295 0.75027260 0.82355276 0.86113057 0.88772069 0.90956267
0.00000000 0.01246079 0.04997740 0.14647135 0.23618304 0.56896690 0.74846193 0.82210637 0.85996899 0.88674111 0.90871286
0.00000000 0.01264804 0.05091029 0.14532327 0.23369813 0.56780880 0.74650946 0.82049500 0.85863122 0.88557959 0.90767756
0.00000000 0.01258379 0.05441814 0.14328899 0.23421265 0.56667836 0.74463195 0.81893822 0.85733834 0.88445779 0.90667886
0.00000000 0.01235489 0.05534144 0.13972834 0.23407167 0.56565767 0.74288102 0.81747813 0.85612824 0.88341238 0.90575329
0.00000000 0.01164285 0.05491856 0.13617572 0.23259977 0.56471888 0.74137763 0.81624341 0.85513266 0.88257661 0.90503470
0.00000000 0.01123516 0.05451986 0.13302500 0.23058182 0.56384944 0.74014857 0.81526289 0.85438087 0.88197941 0.90455118
0.00000000 0.01170028 0.05448572 0.13030396 0.22869710 0.56300673 0.73901417 0.81434785 0.85367937 0.88142411 0.90410327
0.00000000 0.01203744 0.05446314 0.12779524 0.22686986 0.56211129 0.73775249 0.81328422 0.85281770 0.88070204 0.90348370
0.00000000 0.01252174 0.05468255 0.12540825 0.22503684 0.56114115 0.73637605 0.81208989 0.85181595 0.87983386 0.90271318
0.00000000 0.01204216 0.05448324 0.12308703 0.22316631 0.56005171 0.73475061 0.81063556 0.85054767 0.87869399 0.90166587
0.00000000 0.01208405 0.05370577 0.12061848 0.22122137 0.55905380 0.73292378 0.80898109 0.84907741 0.87734996 0.90041216
0.00000000 0.01208114 0.05327149 0.11836815 0.22423237 0.55872348 0.73089307 0.80710407 0.84737466 0.87576801 0.89891706
0.00000000 0.01319262 0.05252537 0.12250094 0.22953053 0.55861679 0.72903691 0.80538638 0.84582401 0.87433412 0.89756711
0.00000000 0.01267271 0.05176979 0.12568715 0.23444761 0.55857746 0.72739141 0.80386039 0.84445719 0.87308043 0.89639532
0.00000000 0.01197670 0.05108469 0.12799218 0.23901409 0.55862137 0.72598290 0.80254962 0.84329613 0.87202794 0.89542183
0.00000000 0.01166676 0.05061309 0.12940604 0.24325420 0.55878543 0.72493025 0.80157501 0.84246187 0.87129756 0.89476713
0.00000000 0.01114004 0.05051888 0.12990732 0.24719995 0.55907267 0.72419066 0.80088878 0.84190402 0.87083763 0.89437872
0.00000000 0.01066224 0.05050459 0.12884951 0.25078674 0.55943146 0.72365713 0.80038653 0.84151884 0.87054413 0.89415209
0.00000000 0.01048867 0.04997535 0.12596258 0.25381926 0.55973346 0.72311930 0.79987140 0.84111503 0.87022787 0.89389862
0.00000000 0.01034259 0.04870579 0.12280240 0.25616968 0.55989564 0.72244729 0.79922364 0.84057724 0.86977524 0.89350557
0.00000000 0.01042042 0.04760759 0.11972072 0.25800032 0.56001689 0.72175318 0.79854525 0.84000367 0.86928401 0.89307200
0.00000000 0.01020977 0.04682758 0.11684544 0.25936290 0.56011773 0.72100222 0.79779749 0.83935448 0.86871472 0.89255987
0.00000000 0.00997750 0.04623790 0.11426726 0.26029607 0.56024336 0.72027949 0.79705810 0.83870416 0.86814010 0.89204051
0.00000000 0.00985172 0.04591486 0.11203173 0.26079978 0.56041844 0.71961863 0.79635680 0.83808048 0.86758699 0.89154019
0.00000000 0.00914207 0.04518968 0.10984937 0.26068750 0.56064748 0.71918181 0.79587236 0.83766928 0.86724446 0.89124940
0.00000000 0.00926866 0.04422417 0.10762815 0.25971859 0.56085431 0.71879260 0.79542758 0.83729231 0.86693295 0.89098708
0.00000000 0.00910520 0.04321439 0.10537650 0.25726366 0.56105401 0.71850711 0.79508142 0.83700980 0.86671352 0.89081495
0.00000000 0.00927524 0.04252770 0.10330979 0.25446793 0.56127338 0.71828874 0.79478725 0.83677096 0.86653378 0.89068041
0.00000000 0.00925490 0.04224016 0.10154172 0.25185422 0.56154040 0.71814275 0.79454461 0.83657282 0.86638996 0.89057953
0.00000000 0.00939124 0.04200688 0.09991804 0.24935894 0.56182896 0.71805817 0.79434933 0.83641413 0.86628187 0.89051251
0.00000000 0.01015442 0.04214713 0.09844737 0.24698280 0.56208840 0.71786219 0.79402427 0.83611573 0.86602911 0.89029808
0.00000000 0.01025543 0.04251032 0.09712582 0.24472759 0.56227081 0.71737388 0.79338437 0.83549141 0.86544501 0.88974961
0.00000000 0.00952018 0.04249987 0.09596817 0.24261172 0.56245083 0.71680064 0.79264158 0.83475850 0.86474923 0.88908751
0.00000000 0.01096606 0.04229916 0.10130047 0.24063930 0.56260462 0.71606858 0.79172182 0.83383906 0.86386228 0.88823180
0.00000000 0.01017264 0.05051008 0.10539379 0.23872201 0.56289561 0.71548436 0.79094797 0.83306282 0.86311697 0.88751650
0.00000000 0.00894057 0.05541205 0.10822151 0.23680046 0.56318613 0.71503111 0.79030528 0.83241685 0.86250159 0.88693104
0.00000000 0.00784700 0.05822949 0.10984985 0.23491124 0.56349576 0.71472685 0.78980613 0.83191055 0.86202396 0.88648196
0.00000000 0.00749289 0.05982468 0.11024628 0.23310944 0.56388083 0.71468400 0.78955957 0.83165139 0.86179092 0.88627603
0.00000000 0.00754134 0.06064872 0.10864321 0.23142520 0.56435304 0.71489318 0.78955317 0.83162524 0.86178762 0.88629801
0.00000000 0.00798910 0.06108043 0.10642898 0.22990280 0.56486475 0.71511882 0.78954090 0.83158124 0.86176051 0.88629263
0.00000000 0.00789571 0.06074573 0.10434079 0.22844613 0.56530015 0.71507718 0.78924234 0.83124044 0.86143057 0.88598026
0.00000000 0.00746685 0.05967516 0.10224321 0.22699433 0.56562816 0.71473216 0.78862674 0.83057489 0.86077121 0.88533502
0.00000000 0.00738355 0.06058566 0.10028707 0.22907376 0.56599448 0.71416803 0.78777719 0.82966796 0.85986529 0.88443884
0.00000000 0.00963418 0.06035863 0.09830091 0.23048635 0.56641806 0.71382423 0.78714718 0.82897803 0.85917448 0.88375593
0.00000000 0.00928589 0.05956911 0.09641579 0.23109798 0.56690759 0.71368906 0.78671892 0.82848560 0.85867932 0.88326783
0.00000000 0.00887941 0.05856632 0.09477005 0.23032928 0.56751778 0.71387603 0.78660169 0.82829788 0.85848633 0.88308088
0.00000000 0.00836692 0.05689641 0.09315372 0.22900968 0.56805728 0.71383616 0.78624279 0.82786005 0.85803820 0.88263519
0.00000000 0.00753102 0.05456738 0.09144761 0.22766444 0.56840884 0.71325930 0.78533230 0.82686252 0.85702466 0.88161950
0.00000000 0.00594212 0.05823701 0.08967347 0.22631335 0.56891741 0.71239891 0.78413200 0.82557081 0.85571295 0.88030143
0.00000000 0.00929076 0.06020070 0.08776551 0.22494162 0.57016614 0.71198217 0.78338521 0.82473554 0.85485870 0.87944105
0.00000000 0.00892168 0.06131661 0.08592112 0.22361389 0.57159758 0.71213656 0.78321218 0.82447542 0.85458130 0.87915927
0.00000000 0.00864355 0.06182078 0.08422355 0.22238851 0.57316124 0.71265517 0.78339796 0.82457159 0.85465985 0.87923418
0.00000000 0.00815268 0.06207127 0.08279277 0.22131876 0.57484949 0.71345922 0.78385474 0.82493165 0.85499931 0.87956866
0.00000000 0.00752960 0.06171784 0.08143783 0.22032489 0.57654043 0.71429077 0.78432530 0.82529778 0.85534017 0.87990099
0.00000000 0.00743268 0.06084068 0.08006130 0.21934642 0.57813121 0.71492935 0.78458795 0.82544694 0.85545747 0.88000396
0.00000000 0.00726111 0.05969835 0.07870187 0.21838914 0.57970850 0.71561060 0.78488581 0.82562605 0.85560087 0.88012966
0.00000000 0.00659070 0.05804281 0.07734068 0.21745900 0.58112429 0.71588823 0.78476568 0.82537961 0.85531405 0.87982191
0.00000000 0.00499834 0.05576206 0.07602060 0.21659652 0.58245954 0.71594225 0.78440717 0.82488796 0.85477843 0.87926341
0.00000000 0.00280014 0.05297534 0.07471730 0.21578947 0.58393706 0.71643995 0.78449040 0.82483612 0.85468151 0.87914262
0.00000000 0.00232098 0.04967743 0.07338445 0.21500525 0.58558930 0.71752275 0.78516030 0.82536883 0.85516677 0.87960100
0.00000000 0.00194724 0.04573552 0.07204695 0.21423940 0.58728431 0.71880975 0.78602525 0.82608853 0.85583222 0.88023270
0.00000000 0.00251306 0.04065962 0.07069239 0.21347145 0.58890148 0.71997685 0.78675668 0.82666378 0.85634405 0.88070201
0.00000000 0.00222903 0.03519398 0.06941912 0.21275074 0.59052958 0.72121264 0.78754753 0.82729097 0.85690221 0.88121268
0.00000000 0.00185005 0.03049525 0.06810297 0.21204420 0.59216372 0.72253489 0.78842290 0.82799884 0.85753770 0.88179760
0.00000000 0.00265876 0.02693939 0.06681302 0.21136219 0.59377090 0.72384521 0.78927979 0.82868137 0.85814223 0.88234652
0.00000000 0.00247554 0.02445241 0.06577546 0.21080899 0.59555230 0.72561724 0.79059738 0.82982166 0.85920321 0.88335143
0.00000000 0.00193908 0.02229418 0.06488755 0.21037302 0.59729053 0.72718918 0.79170221 0.83074190 0.86004045 0.88413087
0.00000000 0.00240025 0.02049302 0.06397188 0.20995505 0.59889018 0.72840323 0.79243590 0.83128155 0.86048979 0.88451622
0.00000000 0.00212379 0.01876335 0.06301939 0.20954229 0.60032788 0.72919185 0.79272937 0.83137158 0.86048234 0.88443873
0.00000000 0.00208941 0.01730515 0.06207102 0.20915285 0.60171023 0.72987188 0.79290511 0.83133694 0.86034464 0.88422619
0.00000000 0.00186801 0.01605465 0.06112575 0.20878317 0.60303697 0.73044297 0.79296342 0.83117847 0.86007795 0.88388020
0.00000000 0.00198866 0.01510124 0.06013049 0.20840438 0.60428371 0.73086415 0.79286694 0.83086030 0.85964790 0.88336713
0.00000000 0.00148315 0.01413091 0.05925484 0.20810314 0.60601497 0.73192182 0.79341260 0.83118798 0.85986479 0.88350141
0.00000000 0.00094459 0.01320913 0.05849263 0.20788957 0.60792376 0.73349584 0.79447714 0.83203283 0.86059763 0.88415080
0.00000000 0.00068835 0.01215030 0.05765493 0.20767211 0.60965477 0.73462992 0.79508824 0.83241488 0.86085973 0.88432235
0.00000000 0.00091918 0.01113011 0.05671804 0.20741661 0.61123261 0.73544324 0.79536756 0.83245600 0.86077217 0.88413585
0.00000000 0.00025581 0.01007937 0.05580692 0.20718847 0.61291951 0.73664920 0.79604039 0.83288687 0.86107020 0.88433070
0.00000000 0.00012732 0.00908820 0.05486982 0.20696464 0.61485908 0.73872507 0.79759790 0.83420252 0.86225051 0.88540414
0.00000000 0.00000000 0.00810325 0.05393721 0.20675753 0.61698998 0.74146423 0.79982877 0.83618916 0.86409767 0.88713952
0.00000000 0.00000000 0.00714440 0.05301058 0.20656931 0.61910169 0.74421138 0.80206260 0.83816986 0.86593034 0.88885223
0.00000000 0.00000000 0.00622683 0.05202282 0.20635803 0.62111371 0.74676926 0.80410047 0.83994449 0.86754677 0.89033877
0.00000000 0.00000000 0.00541607 0.05099352 0.20612723 0.62302212 0.74911878 0.80592594 0.84149914 0.86893543 0.89159010
0.00000000 0.00000000 0.00470831 0.04996428 0.20590087 0.62477362 0.75105290 0.80733049 0.84262745 0.86989300 0.89240659
0.00000000 0.00000000 0.00407997 0.04896370 0.20569850 0.62637225 0.75255369 0.80829703 0.84331482 0.87040766 0.89277941
0.00000000 0.00000000 0.00357398 0.04804122 0.20554777 0.62803040 0.75427937 0.80949582 0.84423587 0.87115698 0.89338824
0.00000000 0.00000000 0.00311920 0.04721094 0.20546056 0.62980290 0.75639490 0.81109448 0.84555887 0.87230953 0.89440180
0.00000000 0.00000000 0.00258077 0.04639917 0.20540565 0.63160246 0.75865543 0.81284365 0.84703162 0.87361042 0.89556248
0.00000000 0.00000000 0.00197270 0.04555665 0.20535198 0.63351683 0.76140467 0.81509461 0.84900617 0.87541073 0.89721945
0.00000000 0.00000000 0.00138063 0.04469577 0.20530042 0.63545709 0.76434746 0.81754645 0.85117920 0.87740561 0.89906687
0.00000000 0.00000000 0.00092763 0.04388410 0.20527803 0.63740133 0.76737375 0.82008618 0.85343740 0.87948233 0.90099306
0.00000000 0.00000000 0.00055169 0.04311652 0.20528772 0.63933997 0.77044684 0.82267981 0.85574927 0.88161178 0.90297133
0.00000000 0.00000000 0.00018415 0.04236141 0.20531627 0.64121767 0.77339052 0.82515037 0.85793864 0.88361868 0.90482743
0.00000000 0.00000000 0.00000000 0.04162503 0.20536799 0.64299334 0.77605111 0.82734165 0.85984953 0.88534780 0.90640718
0.00000000 0.00000000 0.00000000 0.04094125 0.20545719 0.64466263 0.77839030 0.82921325 0.86144153 0.88675918 0.90767129
0.00000000 0.00000000 0.00000000 0.04031970 0.20559336 0.64622320 0.78037871 0.83073501 0.86268544 0.88782487 0.90859319
0.00000000 0.00000000 0.00000000 0.03972576 0.20575904 0.64773365 0.78226057 0.83215669 0.86383248 0.88879635 0.90942399
0.00000000 0.00000000 0.00000000 0.03918016 0.20596418 0.64928491 0.78435873 0.83380738 0.86521388 0.89000617 0.91049703
0.00000000 0.00000000 0.00000000 0.03865854 0.20619784 0.65079342 0.78638031 0.83538915 0.86653002 0.89115363 0.91151092
0.00000000 0.00000000 0.00000000 0.03818489 0.20646608 0.65231303 0.78852190 0.83710328 0.86798409 0.89244330 0.91267127
0.00000000 0.00000000 0.00000000 0.03777127 0.20678113 0.65383464 0.79072652 0.83889383 0.86952200 0.89382321 0.91392842
0.00000000 0.00000000 0.00000000 0.03741448 0.20714416 0.65536956 0.79303946 0.84080674 0.87118971 0.89533923 0.91532802
0.00000000 0.00000000 0.00000000 0.03710772 0.20755241 0.65689619 0.79538312 0.84276178 0.87290558 0.89690851 0.91678614
0.00000000 0.00000000 0.00000000 0.03684437 0.20800280 0.65834630 0.79748617 0.84448015 0.87438797 0.89824758 0.91801787
0.00000000 0.00000000 0.00000000 0.03661426 0.20848803 0.65974243 0.79945647 0.84607011 0.87574443 0.89946283 0.91912820
0.00000000 0.00000000 0.00000000 0.03641753 0.20900750 0.66118678 0.80172967 0.84797535 0.87742025 0.90099977 0.92056205
0.00000000 0.00000000 0.00000000 0.03623594 0.20955454 0.66262756 0.80410832 0.84999221 0.87920841 0.90264869 0.92210730
0.00000000 0.00000000 0.00000000 0.03604005 0.21010810 0.66404800 0.80657721 0.85210261 0.88108745 0.90438455 0.92373513
0.00000000 0.00000000 0.00000000 0.03583525 0.21065900 0.66546188 0.80922915 0.85440047 0.88315042 0.90629906 0.92553569
0.00000000 0.00000000 0.00000000 0.03563924 0.21121758 0.66673644 0.81144030 0.85625001 0.88475972 0.90775503 0.92687349
0.00000000 0.00000000 0.00000000 0.03545234 0.21178625 0.66786434 0.81316149 0.85760077 0.88586550 0.90870343 0.92770048
0.00000000 0.00000000 0.00000000 0.03527361 0.21236304 0.66900506 0.81515038 0.85922593 0.88724482 0.90992263 0.92879490
0.00000000 0.00000000 0.00000000 0.03510257 0.21295210 0.67006596 0.81695824 0.86066704 0.88843668 0.91095079 0.92969493
0.00000000 0.00000000 0.00000000 0.03491692 0.21353904 0.67104617 0.81862209 0.86195923 0.88947389 0.91181805 0.93042789
0.00000000 0.00000000 0.00000000 0.03471365 0.21411400 0.67196255 0.82025888 0.86322077 0.89047388 0.91264046 0.93110822
0.00000000 0.00000000 0.00000000 0.03450801 0.21468155 0.67282873 0.82193312 0.86451936 0.89150620 0.91348926 0.93180871
0.00000000 0.00000000 0.00000000 0.03431577 0.21525397 0.67376849 0.82428793 0.86651497 0.89323650 0.91503366 0.93320102
0.00000000 0.00000000 0.00000000 0.03413507 0.21583772 0.67462462 0.82647643 0.86834387 0.89479747 0.91640575 0.93441835
0.00000000 0.00000000 0.00000000 0.03394051 0.21641796 0.67545945 0.82891405 0.87042730 0.89660902 0.91802257 0.93587391
0.00000000 0.00000000 0.00000000 0.03372908 0.21698530 0.67622471 0.83138204 0.87254035 0.89844302 0.91965337 0.93733479
0.00000000 0.00000000 0.00000000 0.03350862 0.21754070 0.67683665 0.83338121 0.87417420 0.89978946 0.92078863 0.93829292
0.00000000 0.00000000 0.00000000 0.03328979 0.21808917 0.67732354 0.83505874 0.87548130 0.90080427 0.92158727 0.93891000
0.00000000 0.00000000 0.00000000 0.03308204 0.21863571 0.67766590 0.83625784 0.87630332 0.90133099 0.92189523 0.93903470
0.00000000 0.00000000 0.00000000 0.03290217 0.21919537 0.67786639 0.83691255 0.87657430 0.90130655 0.92165287 0.93861106
0.00000000 0.00000000 0.00000000 0.03273932 0.22359775 0.67808285 0.83814132 0.87743477 0.90187456 0.92200344 0.93878002
0.00000000 0.00000000 0.00000000 0.03258643 0.22696011 0.67834110 0.84026688 0.87921427 0.90336120 0.92326879 0.93985799
0.00000000 0.00000000 0.00000000 0.03242879 0.22832877 0.67847244 0.84215783 0.88075593 0.90460510 0.92428586 0.94068252
0.00000000 0.00000000 0.00000000 0.03227629 0.22880795 0.67851912 0.84427018 0.88252830 0.90607793 0.92552822 0.94172814
0.00000000 0.00000000 0.00000000 0.03213689 0.22928885 0.67838395 0.84574785 0.88366036 0.90691095 0.92613161 0.94213693
0.00000000 0.00000000 0.00000000 0.03202414 0.22978122 0.67812718 0.84718339 0.88475842 0.90771353 0.92670713 0.94252049
0.00000000 0.00000000 0.00000000 0.03192231 0.23028143 0.67767906 0.84791852 0.88514829 0.90780958 0.92657856 0.94220380
0.00000000 0.00000000 0.00000000 0.03182358 0.23078128 0.67782879 0.84867670 0.88556437 0.90793112 0.92647518 0.94191112
0.00000000 0.00000000 0.00000000 0.03172838 0.23128218 0.67791714 0.84972452 0.88627833 0.90835077 0.92666799 0.94191207
0.00000000 0.00000000 0.00000000 0.03163196 0.23178003 0.67796271 0.85139816 0.88763476 0.90941237 0.92749861 0.94254595
0.00000000 0.00000000 0.00000000 0.03153676 0.23227476 0.67791390 0.85344294 0.88937563 0.91085816 0.92871047 0.94355762
0.00000000 0.00000000 0.00000000 0.03144496 0.23276657 0.67770036 0.85535987 0.89099169 0.91217851 0.92979548 0.94444109
0.00000000 0.00000000 0.00000000 0.03135983 0.23325760 0.67730160 0.85718071 0.89251714 0.91340928 0.93079102 0.94523522
0.00000000 0.00000000 0.00000000 0.03128064 0.23374680 0.67667175 0.85890884 0.89395546 0.91455381 0.93170029 0.94594306
0.00000000 0.00000000 0.00000000 0.03120621 0.23423252 0.67566653 0.86113495 0.89591193 0.91621793 0.93312735 0.94716625
0.00000000 0.00000000 0.00000000 0.03113863 0.23471469 0.67427351 0.86304143 0.89755305 0.91756824 0.93424206 0.94807877
0.00000000 0.00000000 0.00000000 0.03107734 0.23519260 0.67289999 0.86484046 0.89909519 0.91882129 0.93526033 0.94889568
0.00000000 0.00000000 0.00000000 0.03102195 0.23566619 0.67154533 0.86657640 0.90058307 0.92002180 0.93622672 0.94966129
0.00000000 0.00000000 0.00000000 0.03097209 0.23613548 0.67020934 0.86838822 0.90215869 0.92131206 0.93728322 0.95051719
0.00000000 0.00000000 0.00000000 0.03092823 0.23660088 0.66889217 0.87010332 0.90364569 0.92251598 0.93825476 0.95128944
0.00000000 0.00000000 0.00000000 0.03089122 0.23706320 0.66759379 0.87160081 0.90492028 0.92351034 0.93901910 0.95185695
0.00000000 0.00000000 0.00000000 0.03086016 0.23752177 0.66631313 0.87314188 0.90624879 0.92456132 0.93984128 0.95248331
0.00000000 0.00000000 0.00000000 0.03083585 0.23797733 0.66505143 0.87514459 0.90805992 0.92609843 0.94114991 0.95359576
0.00000000 0.00000000 0.00000000 0.03081815 0.23842987 0.66380981 0.87752477 0.91026869 0.92803673 0.94286046 0.95511021
0.00000000 0.00000000 0.00000000 0.03080688 0.23887923 0.66258875 0.88003216 0.91261961 0.93012067 0.94471824 0.95677313
0.00000000 0.00000000 0.00000000 0.03080283 0.23932624 0.66138836 0.88221397 0.91464928 0.93188704 0.94626206 0.95812586
0.00000000 0.00000000 0.00000000 0.03080445 0.23976996 0.66020646 0.88404235 0.91632713 0.93330464 0.94746024 0.95913628
0.00000000 0.00000000 0.00000000 0.03081291 0.24021174 0.65904353 0.88587207 0.91801654 0.93473807 0.94867715 0.96016814
0.00000000 0.00000000 0.00000000 0.03082631 0.24065020 0.65789712 0.88723529 0.91923618 0.93570436 0.94943020 0.96073970
0.00000000 0.00000000 0.00000000 0.03084405 0.24108587 0.65676712 0.88872525 0.92059334 0.93681174 0.95032614 0.96145557
0.00000000 0.00000000 0.00000000 0.03086563 0.24151782 0.65565395 0.89083680 0.92259543 0.93856768 0.95187046 0.96281869
0.00000000 0.00000000 0.00000000 0.03089328 0.24194722 0.65455795 0.89198152 0.92361676 0.93934698 0.95244489 0.96321953
0.00000000 0.00000000 0.00000000 0.03092757 0.24237472 0.65347758 0.89304975 0.92456678 0.94005912 0.95295543 0.96355960
0.00000000 0.00000000 0.00000000 0.03097088 0.24280306 0.65241606 0.89471818 0.92614123 0.94140207 0.95409947 0.96453486
0.00000000 0.00000000 0.00000000 0.03100937 0.24362134 0.65012849 0.89725906 0.92886073 0.94386848 0.95631245 0.96652736
0.00000000 0.00000000 0.00000000 0.03104786 0.24443962 0.64784091 0.89979994 0.93158022 0.94633489 0.95852543 0.96851987
0.00000000 0.00000000 0.00000000 0.03108636 0.24525790 0.64555334 0.90234083 0.93429972 0.94880130 0.96073840 0.97051238
0.00000000 0.00000000 0.00000000 0.03112485 0.24607618 0.64326576 0.90488171 0.93701921 0.95126772 0.96295138 0.97250488
0.00000000 0.00000000 0.00000000 0.03116334 0.24689446 0.64097819 0.90742259 0.93973871 0.95373413 0.96516436 0.97449739
0.00000000 0.00000000 0.00000000 0.03120183 0.24771274 0.63869061 0.90996347 0.94245820 0.95620054 0.96737733 0.97648989
0.00000000 0.00000000 0.00000000 0.03124032 0.24853103 0.63640303 0.91250435 0.94517770 0.95866695 0.96959031 0.97848240
0.00000000 0.00000000 0.00000000 0.03127882 0.24934931 0.63411546 0.91504523 0.94789719 0.96113336 0.97180329 0.98047490
0.00000000 0.00000000 0.00000000 0.03131731 0.25016759 0.63182788 0.91758611 0.95061669 0.96359977 0.97401626 0.98246741
0.00000000 0.00000000 0.00000000 0.03135580 0.25098587 0.62954031 0.92012699 0.95333618 0.96606618 0.97622924 0.98445992
0.00000000 0.00000000 0.00000000 0.03139429 0.25180415 0.62725273 0.92266787 0.95605568 0.96853259 0.97844222 0.98645242
0.00000000 0.00000000 0.00000000 0.03143279 0.25262243 0.62496516 0.92520875 0.95877517 0.97099900 0.98065519 0.98844493
0.00000000 0.00000000 0.00000000 0.03147128 0.25344071 0.62267758 0.92774963 0.96149466 0.97346541 0.98286817 0.99043743
0.00000000 0.00000000 0.00000000 0.03150977 0.25425900 0.62039001 0.93029051 0.96421416 0.97593182 0.98508115 0.99242994
0.00000000 0.00000000 0.00000000 0.03154826 0.25507728 0.61810243 0.93283139 0.96693365 0.97839823 0.98729412 0.99442244
0.00000000 0.00000000 0.00000000 0.03158676 0.25589556 0.61581485 0.93537227 0.96965315 0.98086464 0.98950710 0.99641495
0.00000000 0.00000000 0.00000000 0.03162525 0.25671384 0.61352728 0.93791315 0.97237264 0.98333105 0.99172008 0.99840746
0.00000000 0.00000000 0.00000000 0.03166374 0.25753212 0.61123970 0.94045403 0.97509214 0.98579746 0.99393305 1.00039996
0.00000000 0.00000000 0.00000000 0.03170223 0.25835040 0.60895213 0.94299492 0.97781163 0.98826387 0.99614603 1.00239247
0.00000000 0.00000000 0.00000000 0.03174072 0.25916868 0.60666455 0.94553580 0.98053113 0.99073028 0.99835901 1.00438497
0.00000000 0.00000000 0.00000000 0.03195075 0.25943600 0.60621904 0.94717646 0.98219768 0.99225968 0.99976383 1.00568873
0.00000000 0.00000000 0.00000000 0.03215739 0.25969959 0.60578135 0.94840079 0.98344045 0.99336935 1.00075319 1.00658149
0.00000000 0.00000000 0.00000000 0.03235689 0.25995504 0.60534671 0.94968187 0.98474280 0.99453859 1.00180108 1.00753119
0.00000000 0.00000000 0.00000000 0.03255838 0.26021318 0.60492407 0.95027472 0.98534448 0.99501626 1.00216765 1.00781034
0.00000000 0.00000000 0.00000000 0.03275753 0.26046852 0.60450674 0.95065411 0.98572874 0.99528048 1.00232456 1.00788348
0.00000000 0.00000000 0.00000000 0.03295124 0.26071762 0.60409193 0.95152203 0.98661718 0.99604927 1.00298423 1.00845638
0.00000000 0.00000000 0.00000000 0.03313659 0.26095712 0.60367736 0.95246598 0.98758232 0.99689308 1.00371627 1.00909847
0.00000000 0.00000000 0.00000000 0.03331944 0.26119387 0.60326881 0.95302832 0.98815715 0.99735064 1.00406656 1.00936345
0.00000000 0.00000000 0.00000000 0.03350025 0.26142811 0.60286512 0.95321904 0.98835078 0.99743095 1.00404403 1.00926018
0.00000000 0.00000000 0.00000000 0.03367882 0.26165971 0.60246609 0.95373443 0.98888160 0.99785141 1.00436293 1.00949870
0.00000000 0.00000000 0.00000000 0.03385201 0.26188905 0.60207240 0.95427779 0.98944378 0.99830646 1.00471895 1.00977639
0.00000000 0.00000000 0.00000000 0.03402244 0.26211566 0.60168361 0.95469336 0.98987636 0.99863527 1.00495186 1.00993388
0.00000000 0.00000000 0.00000000 0.03418588 0.26233458 0.60129464 0.95503691 0.99023223 0.99888652 1.00510606 1.01001127
0.00000000 0.00000000 0.00000000 0.03434318 0.26254627 0.60090553 0.95523436 0.99043500 0.99898426 1.00510633 1.00993413
0.00000000 0.00000000 0.00000000 0.03449840 0.26275544 0.60051986 0.95508155 0.99027716 0.99872500 1.00475379 1.00950856
0.00000000 0.00000000 0.00000000 0.03465169 0.26296215 0.60013689 0.95482740 0.99001515 0.99836471 1.00430326 1.00898779
0.00000000 0.00000000 0.00000000 0.03480274 0.26316600 0.59975675 0.95502423 0.99021967 0.99847294 1.00432135 1.00893465
0.00000000 0.00000000 0.00000000 0.03494780 0.26336268 0.59937658 0.95551816 0.99072918 0.99888494 1.00464060 1.00917924
0.00000000 0.00000000 0.00000000 0.03508681 0.26355221 0.59899586 0.95539558 0.99059918 0.99865743 1.00432194 1.00878820
0.00000000 0.00000000 0.00000000 0.03522396 0.26373937 0.59861917 0.95602061 0.99124373 0.99920636 1.00477875 1.00917009
0.00000000 0.00000000 0.00000000 0.03535943 0.26392422 0.59824855 0.95720156 0.99246650 1.00033570 1.00581582 1.01013089
0.00000000 0.00000000 0.00000000 0.03549320 0.26410678 0.59788442 0.95814685 0.99344942 1.00122821 1.00661937 1.01086154
0.00000000 0.00000000 0.00000000 0.03562498 0.26428687 0.59752646 0.95921449 0.99456243 1.00225339 1.00755726 1.01172766
0.00000000 0.00000000 0.00000000 0.03575515 0.26446476 0.59717512 0.96040026 0.99580134 1.00340697 1.00862517 1.01272493
0.00000000 0.00000000 0.00000000 0.03588374 0.26464048 0.59683071 0.96170132 0.99716344 1.00468618 1.00982027 1.01385045
0.00000000 0.00000000 0.00000000 0.03601035 0.26481411 0.59649354 0.96311100 0.99864200 1.00608425 1.01113578 1.01509743
0.00000000 0.00000000 0.00000000 0.03613190 0.26498592 0.59616371 0.96445241 1.00005383 1.00741808 1.01238927 1.01628445
0.00000000 0.00000000 0.00000000 0.03624493 0.26514754 0.59583376 0.96607024 1.00174866 1.00903025 1.01391512 1.01773716
0.00000000 0.00000000 0.00000000 0.03635509 0.26530567 0.59551037 0.96768126 1.00343976 1.01064003 1.01543948 1.01918902
0.00000000 0.00000000 0.00000000 0.03646985 0.26546885 0.59520112 0.96906140 1.00490228 1.01202986 1.01675275 1.02043870
0.00000000 0.00000000 0.00000000 0.03658344 0.26563013 0.59489878 0.97036996 1.00629403 1.01335123 1.01799965 1.02162394
0.00000000 0.00000000 0.00000000 0.03669126 0.26578440 0.59459891 0.97196490 1.00798157 1.01496619 1.01953658 1.02309491
0.00000000 0.00000000 0.00000000 0.03679568 0.26593454 0.59430440 0.97346078 1.00956832 1.01648085 1.02097360 1.02446632
0.00000000 0.00000000 0.00000000 0.03689878 0.26608282 0.59401709 0.97492518 1.01112598 1.01796868 1.02238573 1.02581455
0.00000000 0.00000000 0.00000000 0.03700066 0.26622931 0.59373683 0.97636338 1.01265985 1.01943489 1.02377809 1.02714467
0.00000000 0.00000000 0.00000000 0.03710135 0.26637404 0.59346315 0.97756399 1.01395028 1.02065995 1.02493205 1.02823926
0.00000000 0.00000000 0.00000000 0.03720088 0.26651690 0.59319481 0.97840609 1.01487058 1.02151686 1.02572078 1.02897191
0.00000000 0.00000000 0.00000000 0.03729402 0.26665287 0.59292694 0.97947290 1.01602107 1.02260148 1.02673364 1.02992452
0.00000000 0.00000000 0.00000000 0.03738108 0.26678345 0.59266149 0.98071172 1.01734897 1.02386225 1.02792048 1.03104846
0.00000000 0.00000000 0.00000000 0.03748431 0.26693365 0.59242203 0.98187933 1.01862432 1.02509020 1.02909390 1.03217808
0.00000000 0.00000000 0.00000000 0.03758534 0.26708071 0.59218670 0.98293454 1.01978313 1.02620189 1.03015142 1.03319213
0.00000000 0.00000000 0.00000000 0.03768280 0.26722387 0.59195444 0.98384183 1.02078763 1.02715906 1.03105451 1.03405180
0.00000000 0.00000000 0.00000000 0.03777708 0.26736329 0.59172491 0.98460834 1.02164502 1.02796903 1.03181060 1.03476469
0.00000000 0.00000000 0.00000000 0.03786802 0.26749879 0.59149743 0.98523547 1.02235618 1.02863249 1.03242020 1.03533111
0.00000000 0.00000000 0.00000000 0.03795576 0.26763060 0.59127171 0.98572974 1.02292772 1.02915623 1.03289027 1.03575821
0.00000000 0.00000000 0.00000000 0.03804041 0.26775878 0.59104739 0.98609207 1.02336035 1.02954098 1.03322164 1.03604688
0.00000000 0.00000000 0.00000000 0.03812237 0.26788355 0.59082419 0.98632459 1.02365615 1.02978898 1.03341671 1.03619969
0.00000000 0.00000000 0.00000000 0.03820095 0.26800453 0.59060076 0.98608808 1.02346154 1.02954655 1.03312299 1.03586600
0.00000000 0.00000000 0.00000000 0.03827734 0.26812254 0.59037664 0.98555006 1.02295042 1.02898816 1.03251501 1.03522004
0.00000000 0.00000000 0.00000000 0.03835137 0.26823752 0.59015071 0.98466020 1.02206963 1.02806061 1.03153974 1.03420907
0.00000000 0.00000000 0.00000000 0.03842361 0.26835024 0.58992404 0.98434591 1.02178421 1.02772875 1.03115826 1.03378874
0.00000000 0.00000000 0.00000000 0.03849450 0.26846115 0.58969873 0.98452643 1.02201213 1.02791101 1.03128970 1.03387905
0.00000000 0.00000000 0.00000000 0.03857671 0.26858467 0.58948918 0.98479199 1.02234077 1.02820688 1.03154704 1.03410709
0.00000000 0.00000000 0.00000000 0.03865874 0.26870747 0.58928404 0.98578054 1.02342265 1.02925728 1.03255722 1.03508474
0.00000000 0.00000000 0.00000000 0.03873939 0.26882850 0.58908393 0.98705756 1.02480621 1.03061004 1.03386912 1.03636276
0.00000000 0.00000000 0.00000000 0.03881841 0.26894758 0.58888866 0.98808661 1.02593293 1.03170653 1.03492611 1.03738748
0.00000000 0.00000000 0.00000000 0.03889528 0.26906428 0.58869661 0.98862143 1.02654514 1.03228878 1.03547101 1.03790297
0.00000000 0.00000000 0.00000000 0.03896998 0.26917861 0.58850657 0.98889588 1.02688525 1.03259919 1.03574526 1.03814930
0.00000000 0.00000000 0.00000000 0.03904254 0.26929059 0.58831824 0.98926306 1.02732075 1.03300510 1.03611470 1.03849012
0.00000000 0.00000000 0.00000000 0.03911298 0.26940024 0.58813127 0.98933311 1.02744537 1.03310036 1.03617489 1.03852346
0.00000000 0.00000000 0.00000000 0.03918132 0.26950756 0.58794466 0.98907215 1.02722308 1.03284895 1.03589001 1.03821375
0.00000000 0.00000000 0.00000000 0.03924759 0.26961255 0.58775805 0.98892137 1.02711325 1.03271008 1.03571732 1.03801548
0.00000000 0.00000000 0.00000000 0.03931178 0.26971522 0.58757119 0.98852236 1.02674234 1.03231034 1.03528501 1.03755914
0.00000000 0.00000000 0.00000000 0.03937391 0.26981557 0.58738356 0.98804852 1.02629073 1.03183002 1.03477262 1.03702316
0.00000000 0.00000000 0.00000000 0.03943399 0.26991357 0.58719528 0.98772341 1.02599160 1.03150220 1.03441222 1.03663820
0.00000000 0.00000000 0.00000000 0.03949201 0.27000923 0.58700640 0.98730594 1.02559380 1.03107585 1.03395383 1.03615582
0.00000000 0.00000000 0.00000000 0.03954798 0.27010252 0.58681643 0.98667903 1.02497496 1.03042860 1.03327567 1.03545501
0.00000000 0.00000000 0.00000000 0.03960186 0.27019342 0.58662556 0.98639839 1.02471484 1.03014001 1.03295473 1.03510917
0.00000000 0.00000000 0.00000000 0.03965362 0.27028189 0.58643496 0.98652166 1.02487463 1.03027129 1.03305194 1.03517885
0.00000000 0.00000000 0.00000000 0.03970325 0.27036789 0.58624586 0.98706076 1.02546790 1.03083605 1.03358083 1.03567748
0.00000000 0.00000000 0.00000000 0.03975068 0.27045137 0.58605852 0.98737730 1.02582884 1.03116858 1.03387850 1.03594623
0.00000000 0.00000000 0.00000000 0.03979586 0.27053227 0.58587242 0.98764572 1.02613915 1.03145054 1.03412588 1.03616492
0.00000000 0.00000000 0.00000000 0.03983870 0.27061052 0.58568719 0.98776814 1.02629646 1.03157960 1.03422108 1.03623229
0.00000000 0.00000000 0.00000000 0.03987909 0.27068600 0.58550210 0.98763579 1.02618673 1.03144174 1.03405059 1.03603558
0.00000000 0.00000000 0.00000000 0.03991692 0.27075861 0.58531690 0.98765816 1.02623746 1.03146440 1.03404002 1.03599775
0.00000000 0.00000000 0.00000000 0.03995203 0.27082819 0.58513120 0.98735341 1.02594533 1.03114434 1.03368833 1.03562091
0.00000000 0.00000000 0.00000000 0.03998492 0.27089497 0.58494412 0.98672842 1.02531686 1.03048821 1.03300231 1.03491196
0.00000000 0.00000000 0.00000000 0.04001447 0.27095802 0.58475434 0.98602923 1.02460834 1.02975190 1.03223636 1.03412334
0.00000000 0.00000000 0.00000000 0.04004090 0.27101767 0.58456293 0.98585069 1.02444246 1.02955844 1.03201122 1.03387232
0.00000000 0.00000000 0.00000000 0.04010371 0.27109087 0.58437852 0.98613289 1.02475557 1.02984305 1.03226160 1.03409348
0.00000000 0.00000000 0.00000000 0.04021038 0.27118117 0.58420341 0.98635792 1.02500694 1.03006531 1.03244973 1.03425271
0.00000000 0.00000000 0.00000000 0.04033610 0.27127812 0.58403337 0.98644763 1.02511737 1.03014775 1.03249993 1.03427613
0.00000000 0.00000000 0.00000000 0.04049176 0.27138624 0.58386993 0.98660491 1.02529794 1.03030087 1.03262130 1.03437109
0.00000000 0.00000000 0.00000000 0.04068953 0.27151032 0.58371490 0.98693771 1.02566036 1.03063526 1.03292295 1.03464509
0.00000000 0.00000000 0.00000000 0.04094724 0.27165692 0.58357135 0.98722659 1.02597526 1.03092177 1.03317707 1.03487214
0.00000000 0.00000000 0.00000000 0.04128537 0.27183400 0.58344396 0.98732044 1.02608724 1.03100796 1.03323491 1.03490751
0.00000000 0.00009010 0.00000000 0.04171443 0.27204490 0.58333647 0.98729478 1.02608059 1.03098317 1.03319036 1.03484938
0.00000000 0.00087646 0.00000000 0.04223263 0.27229064 0.58325431 0.98731902 1.02614186 1.03104227 1.03324547 1.03490645
0.00000000 0.00141059 0.00000000 0.04282832 0.27257612 0.58320443 0.98754870 1.02644083 1.03136136 1.03358169 1.03526506
0.00000000 0.00168541 0.00000000 0.04346514 0.27288449 0.58317745 0.98745402 1.02641986 1.03137923 1.03363639 1.03536204
0.00000000 0.00238819 0.00000000 0.04412872 0.27320949 0.58316837 0.98715267 1.02619982 1.03121472 1.03352577 1.03531062
0.00000000 0.00346631 0.00110048 0.04487278 0.27356615 0.58318377 0.98683194 1.02597500 1.03106155 1.03344244 1.03530206
0.00000000 0.00459965 0.00277293 0.04574477 0.27398227 0.58324330 0.98641874 1.02567640 1.03085896 1.03333447 1.03529351
0.00000000 0.00588150 0.00472189 0.04677288 0.27447545 0.58335801 0.98567110 1.02505156 1.03035663 1.03295509 1.03504230
0.00000000 0.00743607 0.00696764 0.04796477 0.27505125 0.58353146 0.98463322 1.02414583 1.02959989 1.03234941 1.03459322
0.00000000 0.00913240 0.00949771 0.04930705 0.27570507 0.58376340 0.98323324 1.02288407 1.02851394 1.03144312 1.03387245
0.00000000 0.01017700 0.01207830 0.05078200 0.27643708 0.58405642 0.98175533 1.02156469 1.02739820 1.03053515 1.03317777
0.00000000 0.01062943 0.01458271 0.05236536 0.27724163 0.58440498 0.98006635 1.02004171 1.02610097 1.02946879 1.03234769
0.00000000 0.01079055 0.01696167 0.05401540 0.27809868 0.58479277 0.97812091 1.01825978 1.02455943 1.02817385 1.03130455
0.00000000 0.01042438 0.01908512 0.05568964 0.27898635 0.58520279 0.97603459 1.01633445 1.02288354 1.02675385 1.03014506
0.00000000 0.00939751 0.02078583 0.05732726 0.27987593 0.58561439 0.97388965 1.01434747 1.02114975 1.02527925 1.02893318
0.00000000 0.00825423 0.02205170 0.05886302 0.28072987 0.58599963 0.97164916 1.01225395 1.01930589 1.02369023 1.02760128
0.00000000 0.00746241 0.02302812 0.06026866 0.28152080 0.58633779 0.96941268 1.01015498 1.01744850 1.02207789 1.02623462
0.00000000 0.00686829 0.02378080 0.06157014 0.28225239 0.58662935 0.96726331 1.00813758 1.01566424 1.02052831 1.02491862
0.00000000 0.00672610 0.02446042 0.06277741 0.28290764 0.58685480 0.96531533 1.00631321 1.01405585 1.01913503 1.02373738
0.00000000 0.00698218 0.02521887 0.06396593 0.28353497 0.58705253 0.96370272 1.00483633 1.01279118 1.01807895 1.02288508
0.00000000 0.00763883 0.02616725 0.06518681 0.28415805 0.58723877 0.96243026 1.00371645 1.01188386 1.01737807 1.02238422
0.00000000 0.00863275 0.02738974 0.06648510 0.28479793 0.58742746 0.96133175 1.00278179 1.01116459 1.01686662 1.02207322
0.00000000 0.00982212 0.02894412 0.06788877 0.28546802 0.58762822 0.96003687 1.00164496 1.01024742 1.01616204 1.02157379
0.00000000 0.01090005 0.03070938 0.06940309 0.28617515 0.58784730 0.95845608 1.00021445 1.00904359 1.01517871 1.02080366
0.00000000 0.01228908 0.03272780 0.07102209 0.28691799 0.58808457 0.95652878 0.99842756 1.00749140 1.01385610 1.01970353
0.00000000 0.01324406 0.03481869 0.07268172 0.28767074 0.58832966 0.95417667 0.99620548 1.00551410 1.01211905 1.01819968
0.00000000 0.01309323 0.03665487 0.07432534 0.28841192 0.58857190 0.95169598 0.99386213 1.00342739 1.01028298 1.01660629
0.00000000 0.01231748 0.03816207 0.07594545 0.28913972 0.58880504 0.94915648 0.99146662 1.00129691 1.00840983 1.01498147
0.00000000 0.01166077 0.03931997 0.07748105 0.28982356 0.58900715 0.94658604 0.98904571 0.99914554 1.00651797 1.01333869
0.00000000 0.01130893 0.04025079 0.07887031 0.29042310 0.58915308 0.94378242 0.98638512 0.99675530 1.00438600 1.01145319
0.00000000 0.01063420 0.04084161 0.08656611 0.29095141 0.59053305 0.94077768 0.98351903 0.99416283 1.00205400 1.00937126
0.00000000 0.01000889 0.04113839 0.09298499 0.29667274 0.59166728 0.93780934 0.98068405 0.99160905 0.99976447 1.00732601
0.00000000 0.00920049 0.04122624 0.09797165 0.30176938 0.59254639 0.93508554 0.97810903 0.98931914 0.99773863 1.00553992
0.00000000 0.00907046 0.04127286 0.10104602 0.30620339 0.59309675 0.93255982 0.97574634 0.98724205 0.99592251 1.00395911
0.00000000 0.00947674 0.04161626 0.10167652 0.30991493 0.59310664 0.93017384 0.97353256 0.98531283 0.99425074 1.00251826
0.00000000 0.00974603 0.04208586 0.10232548 0.31277202 0.59299438 0.92794850 0.97149368 0.98355996 0.99275421 1.00125070
0.00000000 0.01015822 0.04254661 0.10291282 0.31430787 0.59283553 0.92540058 0.96912339 0.98147741 0.99092844 0.99965319
0.00000000 0.00977829 0.04268000 0.10336617 0.31422243 0.59261183 0.92272506 0.96663283 0.97927950 0.98898892 0.99794192
0.00000000 0.00952593 0.04268647 0.10786437 0.31403770 0.59231717 0.91989598 0.96399002 0.97693766 0.98690529 0.99608465
0.00000000 0.00884430 0.04246573 0.11046973 0.31377655 0.59480798 0.91731570 0.96161427 0.97487520 0.98509927 0.99450139
0.00000000 0.00833537 0.04206798 0.11044921 0.31342312 0.59711226 0.91478224 0.95929219 0.97286852 0.98334781 0.99296976
0.00000000 0.00825413 0.04144893 0.11017349 0.31295019 0.59916977 0.91203084 0.95674426 0.97063801 0.98137118 0.99120984
0.00000000 0.00778926 0.04060366 0.10966046 0.31231755 0.60171661 0.90941287 0.95435164 0.96856628 0.97955141 0.98960236
0.00000000 0.00708958 0.03947619 0.10894814 0.31154366 0.60406877 0.90686653 0.95204511 0.96658535 0.97782259 0.98808378
0.00000000 0.00718064 0.03859989 0.10823004 0.31071076 0.60634159 0.90475179 0.95019841 0.96506472 0.97655149 0.98701895
0.00000000 0.00888404 0.03843832 0.10757040 0.30983557 0.60843071 0.90258548 0.94829807 0.96349046 0.97522484 0.98589578
0.00000000 0.01029843 0.03904415 0.10700833 0.30892517 0.61038021 0.90052356 0.94651839 0.96204353 0.97402940 0.98490673
0.00000000 0.01032403 0.03985052 0.10660124 0.30802707 0.61220158 0.89849408 0.94478753 0.96065799 0.97290572 0.98399926
0.00000000 0.01094879 0.04082908 0.10631346 0.30713531 0.61383517 0.89622582 0.94281549 0.95904150 0.97155960 0.98287746
0.00000000 0.01120296 0.04198053 0.10616349 0.30625339 0.61532525 0.89391756 0.94080980 0.95739840 0.97019224 0.98173928
0.00000000 0.01157327 0.04321073 0.10615404 0.30538536 0.61664830 0.89144181 0.93863209 0.95558789 0.96866096 0.98044033
0.00000000 0.01219275 0.04461230 0.10621119 0.30449339 0.61778071 0.88875423 0.93623670 0.95356324 0.96691736 0.97893019
0.00000000 0.01274463 0.04599752 0.11061290 0.30355972 0.61875440 0.88605064 0.93384446 0.95154693 0.96518351 0.97742985
0.00000000 0.01317278 0.05237131 0.11352821 0.30261780 0.61957725 0.88329584 0.93140934 0.94949305 0.96341514 0.97589725
0.00000000 0.01346983 0.05668158 0.11399316 0.30675121 0.62025025 0.88045260 0.92889548 0.94736707 0.96157862 0.97429957
0.00000000 0.01380448 0.05879482 0.11392637 0.31029036 0.62099399 0.87757727 0.92636971 0.94523572 0.95974008 0.97270202
0.00000000 0.01373645 0.05836889 0.11381689 0.31316656 0.62155703 0.87450900 0.92365941 0.94292721 0.95772822 0.97093374
0.00000000 0.01180930 0.05680457 0.11913667 0.31525951 0.62192056 0.87120558 0.92075924 0.94045566 0.95557197 0.96903736
0.00000000 0.00929220 0.05822273 0.12464427 0.31764280 0.62202398 0.86781326 0.91780898 0.93794980 0.95338728 0.96711413
0.00000000 0.01027163 0.05722213 0.12872238 0.31925474 0.62190642 0.86439474 0.91486222 0.93545363 0.95121173 0.96519622
0.00000000 0.00995289 0.05437815 0.13175059 0.32021663 0.62209455 0.86114195 0.91209160 0.93312881 0.94920044 0.96343391
0.00000000 0.00949056 0.05139494 0.13384636 0.32050658 0.62216105 0.85792397 0.90934518 0.93081927 0.94719602 0.96166977
0.00000000 0.00948326 0.04926142 0.13740301 0.31981477 0.62201963 0.85451547 0.90640359 0.92831123 0.94498752 0.95969464
0.00000000 0.00944184 0.04734325 0.13977095 0.31752994 0.62208835 0.85106439 0.90345266 0.92579470 0.94276740 0.95770290
0.00000000 0.00955679 0.04600171 0.14105748 0.31485115 0.62194496 0.84742176 0.90031753 0.92309395 0.94036052 0.95552073
0.00000000 0.00927994 0.04466171 0.14099782 0.31206874 0.62164463 0.84380725 0.89724370 0.92045700 0.93801628 0.95339851
0.00000000 0.00886667 0.04364779 0.13939689 0.30925168 0.62128189 0.84053974 0.89452919 0.91817981 0.93603013 0.95163179
0.00000000 0.00874409 0.04265221 0.13564911 0.30632031 0.62076024 0.83732376 0.89187363 0.91596322 0.93410311 0.94992135
0.00000000 0.00854468 0.04159431 0.13186279 0.30326789 0.62007598 0.83413468 0.88925468 0.91378636 0.93221562 0.94824883
0.00000000 0.00839315 0.04073900 0.12816104 0.30013438 0.61928891 0.83118061 0.88687941 0.91185320 0.93056948 0.94681418
0.00000000 0.00872880 0.04032670 0.12468435 0.29698282 0.61841588 0.82842111 0.88470042 0.91011342 0.92911318 0.94556543
0.00000000 0.00931297 0.04064156 0.12160691 0.29389480 0.61749462 0.82588173 0.88273546 0.90858080 0.92785861 0.94451353
0.00000000 0.01002593 0.04156041 0.11895954 0.29089550 0.61654277 0.82358635 0.88101044 0.90728224 0.92683388 0.94368802
0.00000000 0.01095944 0.04289751 0.11669028 0.28796945 0.61550317 0.82128184 0.87926784 0.90596009 0.92578128 0.94283124
0.00000000 0.01177969 0.04450121 0.11474307 0.28510024 0.61434701 0.81884184 0.87738083 0.90448856 0.92457585 0.94181900
0.00000000 0.01219237 0.04587600 0.11292716 0.28221828 0.61304374 0.81622085 0.87531415 0.90283801 0.92319143 0.94062797
0.00000000 0.01238696 0.04699819 0.11113365 0.27928085 0.61161368 0.81358276 0.87324483 0.90119049 0.92181323 0.93944579
0.00000000 0.01158221 0.04730554 0.10916060 0.27620090 0.61002349 0.81092864 0.87118040 0.89955589 0.92045153 0.93828218
0.00000000 0.00949496 0.04607528 0.10673112 0.27286416 0.60822862 0.80825598 0.86912703 0.89794388 0.91911705 0.93714747
0.00000000 0.00862394 0.04397526 0.10395093 0.26932443 0.60625221 0.80558105 0.86709463 0.89636102 0.91781457 0.93604541
0.00000000 0.00934535 0.04272498 0.10131697 0.26578284 0.60414464 0.80276464 0.86491133 0.89462133 0.91635055 0.93477749
0.00000000 0.01101273 0.04257651 0.09914957 0.26237921 0.60218298 0.79996468 0.86272513 0.89286793 0.91486476 0.93348177
0.00000000 0.01071392 0.04293283 0.10287791 0.25909060 0.60018767 0.79728021 0.86064843 0.89121699 0.91347708 0.93228021
0.00000000 0.01096138 0.04342910 0.10546700 0.25583296 0.59811202 0.79464231 0.85861753 0.88960926 0.91213066 0.93111841
0.00000000 0.01106714 0.04400008 0.10692449 0.25266356 0.59598681 0.79202308 0.85660491 0.88801892 0.91080219 0.92997637
0.00000000 0.01121464 0.04470868 0.10700238 0.24962105 0.59381989 0.78933321 0.85451529 0.88634915 0.90939430 0.92875685
0.00000000 0.01062856 0.04502402 0.10981930 0.24656335 0.59151251 0.78631312 0.85209869 0.88435299 0.90766002 0.92721120
0.00000000 0.00961952 0.04435206 0.11122534 0.24887811 0.59006924 0.78348462 0.84989286 0.88256799 0.90613486 0.92587113
0.00000000 0.00945552 0.04404199 0.11162839 0.25081534 0.58867232 0.78099468 0.84800460 0.88108906 0.90490841 0.92482343
0.00000000 0.00972708 0.04396251 0.11030655 0.25228787 0.58721128 0.77840231 0.84598581 0.87946617 0.90352952 0.92361645
0.00000000 0.01009864 0.04422367 0.10769008 0.25321268 0.58562547 0.77555781 0.84369036 0.87755543 0.90185530 0.92210785
0.00000000 0.01009314 0.04437081 0.11554658 0.25362931 0.58403124 0.77287105 0.84154101 0.87578153 0.90031098 0.92072272
0.00000000 0.01061144 0.04489572 0.12248516 0.25355391 0.58244955 0.77036105 0.83954660 0.87415098 0.89890324 0.91946904
0.00000000 0.01055715 0.04546734 0.12841606 0.25281306 0.58082774 0.76788518 0.83756980 0.87252940 0.89749928 0.91821513
0.00000000 0.01077533 0.04591192 0.13346849 0.25117128 0.57921750 0.76558504 0.83575589 0.87106359 0.89624684 0.91710967
0.00000000 0.01093368 0.04622482 0.13746664 0.24802684 0.57751137 0.76316164 0.83381303 0.86946569 0.89486065 0.91586971
0.00000000 0.01125150 0.04617120 0.14037541 0.24470455 0.57599418 0.76070776 0.83184238 0.86783879 0.89344337 0.91459604
0.00000000 0.01165407 0.04643782 0.14257879 0.24492258 0.57462391 0.75825508 0.82985982 0.86619236 0.89200238 0.91329606
0.00000000 0.01215244 0.04690391 0.14424499 0.24459988 0.57337209 0.75596548 0.82802655 0.86468741 0.89069959 0.91213311
0.00000000 0.01112301 0.04759914 0.14562323 0.24368144 0.57224821 0.75399483 0.82648729 0.86346567 0.88967621 0.91124896
0.00000000 0.01153605 0.04840212 0.14655373 0.24148325 0.57115204 0.75206159 0.82495687 0.86223952 0.88864218 0.91035096
0.00000000 0.01199231 0.04917641 0.14685434 0.23877826 0.57007295 0.75027260 0.82355276 0.86113057 0.88772069 0.90956267
0.00000000 0.01246079 0.04997740 0.14647135 0.23618304 0.56896690 0.74846193 0.82210637 0.85996899 0.88674111 0.90871286
0.00000000 0.01264804 0.05091029 0.14532327 0.23369813 0.56780880 0.74650946 0.82049500 0.85863122 0.88557959 0.90767756
0.00000000 0.01258379 0.05441814 0.14328899 0.23421265 0.56667836 0.74463195 0.81893822 0.85733834 0.88445779 0.90667886
0.00000000 0.01235489 0.05534144 0.13972834 0.23407167 0.56565767 0.74288102 0.81747813 0.85612824 0.88341238 0.90575329
0.00000000 0.01164285 0.05491856 0.13617572 0.23259977 0.56471888 0.74137763 0.81624341 0.85513266 0.88257661 0.90503470
0.00000000 0.01123516 0.05451986 0.13302500 0.23058182 0.56384944 0.74014857 0.81526289 0.85438087 0.88197941 0.90455118
0.00000000 0.01170028 0.05448572 0.13030396 0.22869710 0.56300673 0.73901417 0.81434785 0.85367937 0.88142411 0.90410327
0.00000000 0.01203744 0.05446314 0.12779524 0.22686986 0.56211129 0.73775249 0.81328422 0.85281770 0.88070204 0.90348370
0.00000000 0.01252174 0.05468255 0.12540825 0.22503684 0.56114115 0.73637605 0.81208989 0.85181595 0.87983386 0.90271318
0.00000000 0.01204216 0.05448324 0.12308703 0.22316631 0.56005171 0.73475061 0.81063556 0.85054767 0.87869399 0.90166587
0.00000000 0.01208405 0.05370577 0.12061848 0.22122137 0.55905380 0.73292378 0.80898109 0.84907741 0.87734996 0.90041216
0.00000000 0.01208114 0.05327149 0.11836815 0.22423237 0.55872348 0.73089307 0.80710407 0.84737466 0.87576801 0.89891706
0.00000000 0.01319262 0.05252537 0.12250094 0.22953053 0.55861679 0.72903691 0.80538638 0.84582401 0.87433412 0.89756711
0.00000000 0.01267271 0.05176979 0.12568715 0.23444761 0.55857746 0.72739141 0.80386039 0.84445719 0.87308043 0.89639532
0.00000000 0.01197670 0.05108469 0.12799218 0.23901409 0.55862137 0.72598290 0.80254962 0.84329613 0.87202794 0.89542183
0.00000000 0.01166676 0.05061309 0.12940604 0.24325420 0.55878543 0.72493025 0.80157501 0.84246187 0.87129756 0.89476713
0.00000000 0.01114004 0.05051888 0.12990732 0.24719995 0.55907267 0.72419066 0.80088878 0.84190402 0.87083763 0.89437872
0.00000000 0.01066224 0.05050459 0.12884951 0.25078674 0.55943146 0.72365713 0.80038653 0.84151884 0.87054413 0.89415209
0.00000000 0.01048867 0.04997535 0.12596258 0.25381926 0.55973346 0.72311930 0.79987140 0.84111503 0.87022787 0.89389862
0.00000000 0.01034259 0.04870579 0.12280240 0.25616968 0.55989564 0.72244729 0.79922364 0.84057724 0.86977524 0.89350557
0.00000000 0.01042042 0.04760759 0.11972072 0.25800032 0.56001689 0.72175318 0.79854525 0.84000367 0.86928401 0.89307200
0.00000000 0.01020977 0.04682758 0.11684544 0.25936290 0.56011773 0.72100222 0.79779749 0.83935448 0.86871472 0.89255987
0.00000000 0.00997750 0.04623790 0.11426726 0.26029607 0.56024336 0.72027949 0.79705810 0.83870416 0.86814010 0.89204051
0.00000000 0.00985172 0.04591486 0.11203173 0.26079978 0.56041844 0.71961863 0.79635680 0.83808048 0.86758699 0.89154019
0.00000000 0.00914207 0.04518968 0.10984937 0.26068750 0.56064748 0.71918181 0.79587236 0.83766928 0.86724446 0.89124940
0.00000000 0.00926866 0.04422417 0.10762815 0.25971859 0.56085431 0.71879260 0.79542758 0.83729231 0.86693295 0.89098708
0.00000000 0.00910520 0.04321439 0.10537650 0.25726366 0.56105401 0.71850711 0.79508142 0.83700980 0.86671352 0.89081495
0.00000000 0.00927524 0.04252770 0.10330979 0.25446793 0.56127338 0.71828874 0.79478725 0.83677096 0.86653378 0.89068041
0.00000000 0.00925490 0.04224016 0.10154172 0.25185422 0.56154040 0.71814275 0.79454461 0.83657282 0.86638996 0.89057953
0.00000000 0.00939124 0.04200688 0.09991804 0.24935894 0.56182896 0.71805817 0.79434933 0.83641413 0.86628187 0.89051251
0.00000000 0.01015442 0.04214713 0.09844737 0.24698280 0.56208840 0.71786219 0.79402427 0.83611573 0.86602911 0.89029808
0.00000000 0.01025543 0.04251032 0.09712582 0.24472759 0.56227081 0.71737388 0.79338437 0.83549141 0.86544501 0.88974961
0.00000000 0.00952018 0.04249987 0.09596817 0.24261172 0.56245083 0.71680064 0.79264158 0.83475850 0.86474923 0.88908751
0.00000000 0.01096606 0.04229916 0.10130047 0.24063930 0.56260462 0.71606858 0.79172182 0.83383906 0.86386228 0.88823180
0.00000000 0.01017264 0.05051008 0.10539379 0.23872201 0.56289561 0.71548436 0.79094797 0.83306282 0.86311697 0.88751650
0.00000000 0.00894057 0.05541205 0.10822151 0.23680046 0.56318613 0.71503111 0.79030528 0.83241685 0.86250159 0.88693104
0.00000000 0.00784700 0.05822949 0.10984985 0.23491124 0.56349576 0.71472685 0.78980613 0.83191055 0.86202396 0.88648196
0.00000000 0.00749289 0.05982468 0.11024628 0.23310944 0.56388083 0.71468400 0.78955957 0.83165139 0.86179092 0.88627603
0.00000000 0.00754134 0.06064872 0.10864321 0.23142520 0.56435304 0.71489318 0.78955317 0.83162524 0.86178762 0.88629801
0.00000000 0.00798910 0.06108043 0.10642898 0.22990280 0.56486475 0.71511882 0.78954090 0.83158124 0.86176051 0.88629263
0.00000000 0.00789571 0.06074573 0.10434079 0.22844613 0.56530015 0.71507718 0.78924234 0.83124044 0.86143057 0.88598026
0.00000000 0.00746685 0.05967516 0.10224321 0.22699433 0.56562816 0.71473216 0.78862674 0.83057489 0.86077121 0.88533502
0.00000000 0.00738355 0.06058566 0.10028707 0.22907376 0.56599448 0.71416803 0.78777719 0.82966796 0.85986529 0.88443884
0.00000000 0.00963418 0.06035863 0.09830091 0.23048635 0.56641806 0.71382423 0.78714718 0.82897803 0.85917448 0.88375593
0.00000000 0.00928589 0.05956911 0.09641579 0.23109798 0.56690759 0.71368906 0.78671892 0.82848560 0.85867932 0.88326783
0.00000000 0.00887941 0.05856632 0.09477005 0.23032928 0.56751778 0.71387603 0.78660169 0.82829788 0.85848633 0.88308088
0.00000000 0.00836692 0.05689641 0.09315372 0.22900968 0.56805728 0.71383616 0.78624279 0.82786005 0.85803820 0.88263519
0.00000000 0.00753102 0.05456738 0.09144761 0.22766444 0.56840884 0.71325930 0.78533230 0.82686252 0.85702466 0.88161950
0.00000000 0.00594212 0.05823701 0.08967347 0.22631335 0.56891741 0.71239891 0.78413200 0.82557081 0.85571295 0.88030143
0.00000000 0.00929076 0.06020070 0.08776551 0.22494162 0.57016614 0.71198217 0.78338521 0.82473554 0.85485870 0.87944105
0.00000000 0.00892168 0.06131661 0.08592112 0.22361389 0.57159758 0.71213656 0.78321218 0.82447542 0.85458130 0.87915927
0.00000000 0.00864355 0.06182078 0.08422355 0.22238851 0.57316124 0.71265517 0.78339796 0.82457159 0.85465985 0.87923418
0.00000000 0.00815268 0.06207127 0.08279277 0.22131876 0.57484949 0.71345922 0.78385474 0.82493165 0.85499931 0.87956866
0.00000000 0.00752960 0.06171784 0.08143783 0.22032489 0.57654043 0.71429077 0.78432530 0.82529778 0.85534017 0.87990099
0.00000000 0.00743268 0.06084068 0.08006130 0.21934642 0.57813121 0.71492935 0.78458795 0.82544694 0.85545747 0.88000396
0.00000000 0.00726111 0.05969835 0.07870187 0.21838914 0.57970850 0.71561060 0.78488581 0.82562605 0.85560087 0.88012966
0.00000000 0.00659070 0.05804281 0.07734068 0.21745900 0.58112429 0.71588823 0.78476568 0.82537961 0.85531405 0.87982191
0.00000000 0.00499834 0.05576206 0.07602060 0.21659652 0.58245954 0.71594225 0.78440717 0.82488796 0.85477843 0.87926341
0.00000000 0.00280014 0.05297534 0.07471730 0.21578947 0.58393706 0.71643995 0.78449040 0.82483612 0.85468151 0.87914262
0.00000000 0.00232098 0.04967743 0.07338445 0.21500525 0.58558930 0.71752275 0.78516030 0.82536883 0.85516677 0.87960100
0.00000000 0.00194724 0.04573552 0.07204695 0.21423940 0.58728431 0.71880975 0.78602525 0.82608853 0.85583222 0.88023270
0.00000000 0.00251306 0.04065962 0.07069239 0.21347145 0.58890148 0.71997685 0.78675668 0.82666378 0.85634405 0.88070201
0.00000000 0.00222903 0.03519398 0.06941912 0.21275074 0.59052958 0.72121264 0.78754753 0.82729097 0.85690221 0.88121268
0.00000000 0.00185005 0.03049525 0.06810297 0.21204420 0.59216372 0.72253489 0.78842290 0.82799884 0.85753770 0.88179760
0.00000000 0.00265876 0.02693939 0.06681302 0.21136219 0.59377090 0.72384521 0.78927979 0.82868137 0.85814223 0.88234652
0.00000000 0.00247554 0.02445241 0.06577546 0.21080899 0.59555230 0.72561724 0.79059738 0.82982166 0.85920321 0.88335143
0.00000000 0.00193908 0.02229418 0.06488755 0.21037302 0.59729053 0.72718918 0.79170221 0.83074190 0.86004045 0.88413087
0.00000000 0.00240025 0.02049302 0.06397188 0.20995505 0.59889018 0.72840323 0.79243590 0.83128155 0.86048979 0.88451622
0.00000000 0.00212379 0.01876335 0.06301939 0.20954229 0.60032788 0.72919185 0.79272937 0.83137158 0.86048234 0.88443873
0.00000000 0.00208941 0.01730515 0.06207102 0.20915285 0.60171023 0.72987188 0.79290511 0.83133694 0.86034464 0.88422619
0.00000000 0.00186801 0.01605465 0.06112575 0.20878317 0.60303697 0.73044297 0.79296342 0.83117847 0.86007795 0.88388020
0.00000000 0.00198866 0.01510124 0.06013049 0.20840438 0.60428371 0.73086415 0.79286694 0.83086030 0.85964790 0.88336713
0.00000000 0.00148315 0.01413091 0.05925484 0.20810314 0.60601497 0.73192182 0.79341260 0.83118798 0.85986479 0.88350141
0.00000000 0.00094459 0.01320913 0.05849263 0.20788957 0.60792376 0.73349584 0.79447714 0.83203283 0.86059763 0.88415080
0.00000000 0.00068835 0.01215030 0.05765493 0.20767211 0.60965477 0.73462992 0.79508824 0.83241488 0.86085973 0.88432235
0.00000000 0.00091918 0.01113011 0.05671804 0.20741661 0.61123261 0.73544324 0.79536756 0.83245600 0.86077217 0.88413585
0.00000000 0.00025581 0.01007937 0.05580692 0.20718847 0.61291951 0.73664920 0.79604039 0.83288687 0.86107020 0.88433070
0.00000000 0.00012732 0.00908820 0.05486982 0.20696464 0.61485908 0.73872507 0.79759790 0.83420252 0.86225051 0.88540414
0.00000000 0.00000000 0.00810325 0.05393721 0.20675753 0.61698998 0.74146423 0.79982877 0.83618916 0.86409767 0.88713952
0.00000000 0.00000000 0.00714440 0.05301058 0.20656931 0.61910169 0.74421138 0.80206260 0.83816986 0.86593034 0.88885223
0.00000000 0.00000000 0.00622683 0.05202282 0.20635803 0.62111371 0.74676926 0.80410047 0.83994449 0.86754677 0.89033877
0.00000000 0.00000000 0.00541607 0.05099352 0.20612723 0.62302212 0.74911878 0.80592594 0.84149914 0.86893543 0.89159010
0.00000000 0.00000000 0.00470831 0.04996428 0.20590087 0.62477362 0.75105290 0.80733049 0.84262745 0.86989300 0.89240659
0.00000000 0.00000000 0.00407997 0.04896370 0.20569850 0.62637225 0.75255369 0.80829703 0.84331482 0.87040766 0.89277941
0.00000000 0.00000000 0.00357398 0.04804122 0.20554777 0.62803040 0.75427937 0.80949582 0.84423587 0.87115698 0.89338824
0.00000000 0.00000000 0.00311920 0.04721094 0.20546056 0.62980290 0.75639490 0.81109448 0.84555887 0.87230953 0.89440180
0.00000000 0.00000000 0.00258077 0.04639917 0.20540565 0.63160246 0.75865543 0.81284365 0.84703162 0.87361042 0.89556248
0.00000000 0.00000000 0.00197270 0.04555665 0.20535198 0.63351683 0.76140467 0.81509461 0.84900617 0.87541073 0.89721945
0.00000000 0.00000000 0.00138063 0.04469577 0.20530042 0.63545709 0.76434746 0.81754645 0.85117920 0.87740561 0.89906687
0.00000000 0.00000000 0.00092763 0.04388410 0.20527803 0.63740133 0.76737375 0.82008618 0.85343740 0.87948233 0.90099306
0.00000000 0.00000000 0.00055169 0.04311652 0.20528772 0.63933997 0.77044684 0.82267981 0.85574927 0.88161178 0.90297133
0.00000000 0.00000000 0.00018415 0.04236141 0.20531627 0.64121767 0.77339052 0.82515037 0.85793864 0.88361868 0.90482743
0.00000000 0.00000000 0.00000000 0.04162503 0.20536799 0.64299334 0.77605111 0.82734165 0.85984953 0.88534780 0.90640718
0.00000000 0.00000000 0.00000000 0.04094125 0.20545719 0.64466263 0.77839030 0.82921325 0.86144153 0.88675918 0.90767129
0.00000000 0.00000000 0.00000000 0.04031970 0.20559336 0.64622320 0.78037871 0.83073501 0.86268544 0.88782487 0.90859319
0.00000000 0.00000000 0.00000000 0.03972576 0.20575904 0.64773365 0.78226057 0.83215669 0.86383248 0.88879635 0.90942399
0.00000000 0.00000000 0.00000000 0.03918016 0.20596418 0.64928491 0.78435873 0.83380738 0.86521388 0.89000617 0.91049703
0.00000000 0.00000000 0.00000000 0.03865854 0.20619784 0.65079342 0.78638031 0.83538915 0.86653002 0.89115363 0.91151092
0.00000000 0.00000000 0.00000000 0.03818489 0.20646608 0.65231303 0.78852190 0.83710328 0.86798409 0.89244330 0.91267127
0.00000000 0.00000000 0.00000000 0.03777127 0.20678113 0.65383464 0.79072652 0.83889383 0.86952200 0.89382321 0.91392842
0.00000000 0.00000000 0.00000000 0.03741448 0.20714416 0.65536956 0.79303946 0.84080674 0.87118971 0.89533923 0.91532802
0.00000000 0.00000000 0.00000000 0.03710772 0.20755241 0.65689619 0.79538312 0.84276178 0.87290558 0.89690851 0.91678614
0.00000000 0.00000000 0.00000000 0.03684437 0.20800280 0.65834630 0.79748617 0.84448015 0.87438797 0.89824758 0.91801787
0.00000000 0.00000000 0.00000000 0.03661426 0.20848803 0.65974243 0.79945647 0.84607011 0.87574443 0.89946283 0.91912820
0.00000000 0.00000000 0.00000000 0.03641753 0.20900750 0.66118678 0.80172967 0.84797535 0.87742025 0.90099977 0.92056205
0.00000000 0.00000000 0.00000000 0.03623594 0.20955454 0.66262756 0.80410832 0.84999221 0.87920841 0.90264869 0.92210730
0.00000000 0.00000000 0.00000000 0.03604005 0.21010810 0.66404800 0.80657721 0.85210261 0.88108745 0.90438455 0.92373513
0.00000000 0.00000000 0.00000000 0.03583525 0.21065900 0.66546188 0.80922915 0.85440047 0.88315042 0.90629906 0.92553569
0.00000000 0.00000000 0.00000000 0.03563924 0.21121758 0.66673644 0.81144030 0.85625001 0.88475972 0.90775503 0.92687349
0.00000000 0.00000000 0.00000000 0.03545234 0.21178625 0.66786434 0.81316149 0.85760077 0.88586550 0.90870343 0.92770048
0.00000000 0.00000000 0.00000000 0.03527361 0.21236304 0.66900506 0.81515038 0.85922593 0.88724482 0.90992263 0.92879490
0.00000000 0.00000000 0.00000000 0.03510257 0.21295210 0.67006596 0.81695824 0.86066704 0.88843668 0.91095079 0.92969493
0.00000000 0.00000000 0.00000000 0.03491692 0.21353904 0.67104617 0.81862209 0.86195923 0.88947389 0.91181805 0.93042789
0.00000000 0.00000000 0.00000000 0.03471365 0.21411400 0.67196255 0.82025888 0.86322077 0.89047388 0.91264046 0.93110822
0.00000000 0.00000000 0.00000000 0.03450801 0.21468155 0.67282873 0.82193312 0.86451936 0.89150620 0.91348926 0.93180871
0.00000000 0.00000000 0.00000000 0.03431577 0.21525397 0.67376849 0.82428793 0.86651497 0.89323650 0.91503366 0.93320102
0.00000000 0.00000000 0.00000000 0.03413507 0.21583772 0.67462462 0.82647643 0.86834387 0.89479747 0.91640575 0.93441835
0.00000000 0.00000000 0.00000000 0.03394051 0.21641796 0.67545945 0.82891405 0.87042730 0.89660902 0.91802257 0.93587391
0.00000000 0.00000000 0.00000000 0.03372908 0.21698530 0.67622471 0.83138204 0.87254035 0.89844302 0.91965337 0.93733479
0.00000000 0.00000000 0.00000000 0.03350862 0.21754070 0.67683665 0.83338121 0.87417420 0.89978946 0.92078863 0.93829292
0.00000000 0.00000000 0.00000000 0.03328979 0.21808917 0.67732354 0.83505874 0.87548130 0.90080427 0.92158727 0.93891000
0.00000000 0.00000000 0.00000000 0.03308204 0.21863571 0.67766590 0.83625784 0.87630332 0.90133099 0.92189523 0.93903470
0.00000000 0.00000000 0.00000000 0.03290217 0.21919537 0.67786639 0.83691255 0.87657430 0.90130655 0.92165287 0.93861106
0.00000000 0.00000000 0.00000000 0.03273932 0.22359775 0.67808285 0.83814132 0.87743477 0.90187456 0.92200344 0.93878002
0.00000000 0.00000000 0.00000000 0.03258643 0.22696011 0.67834110 0.84026688 0.87921427 0.90336120 0.92326879 0.93985799
0.00000000 0.00000000 0.00000000 0.03242879 0.22832877 0.67847244 0.84215783 0.88075593 0.90460510 0.92428586 0.94068252
0.00000000 0.00000000 0.00000000 0.03227629 0.22880795 0.67851912 0.84427018 0.88252830 0.90607793 0.92552822 0.94172814
0.00000000 0.00000000 0.00000000 0.03213689 0.22928885 0.67838395 0.84574785 0.88366036 0.90691095 0.92613161 0.94213693
0.00000000 0.00000000 0.00000000 0.03202414 0.22978122 0.67812718 0.84718339 0.88475842 0.90771353 0.92670713 0.94252049
0.00000000 0.00000000 0.00000000 0.03192231 0.23028143 0.67767906 0.84791852 0.88514829 0.90780958 0.92657856 0.94220380
0.00000000 0.00000000 0.00000000 0.03182358 0.23078128 0.67782879 0.84867670 0.88556437 0.90793112 0.92647518 0.94191112
0.00000000 0.00000000 0.00000000 0.03172838 0.23128218 0.67791714 0.84972452 0.88627833 0.90835077 0.92666799 0.94191207
0.00000000 0.00000000 0.00000000 0.03163196 0.23178003 0.67796271 0.85139816 0.88763476 0.90941237 0.92749861 0.94254595
0.00000000 0.00000000 0.00000000 0.03153676 0.23227476 0.67791390 0.85344294 0.88937563 0.91085816 0.92871047 0.94355762
0.00000000 0.00000000 0.00000000 0.03144496 0.23276657 0.67770036 0.85535987 0.89099169 0.91217851 0.92979548 0.94444109
0.00000000 0.00000000 0.00000000 0.03135983 0.23325760 0.67730160 0.85718071 0.89251714 0.91340928 0.93079102 0.94523522
0.00000000 0.00000000 0.00000000 0.03128064 0.23374680 0.67667175 0.85890884 0.89395546 0.91455381 0.93170029 0.94594306
0.00000000 0.00000000 0.00000000 0.03120621 0.23423252 0.67566653 0.86113495 0.89591193 0.91621793 0.93312735 0.94716625
0.00000000 0.00000000 0.00000000 0.03113863 0.23471469 0.67427351 0.86304143 0.89755305 0.91756824 0.93424206 0.94807877
0.00000000 0.00000000 0.00000000 0.03107734 0.23519260 0.67289999 0.86484046 0.89909519 0.91882129 0.93526033 0.94889568
0.00000000 0.00000000 0.00000000 0.03102195 0.23566619 0.67154533 0.86657640 0.90058307 0.92002180 0.93622672 0.94966129
0.00000000 0.00000000 0.00000000 0.03097209 0.23613548 0.67020934 0.86838822 0.90215869 0.92131206 0.93728322 0.95051719
0.00000000 0.00000000 0.00000000 0.03092823 0.23660088 0.66889217 0.87010332 0.90364569 0.92251598 0.93825476 0.95128944
0.00000000 0.00000000 0.00000000 0.03089122 0.23706320 0.66759379 0.87160081 0.90492028 0.92351034 0.93901910 0.95185695
0.00000000 0.00000000 0.00000000 0.03086016 0.23752177 0.66631313 0.87314188 0.90624879 0.92456132 0.93984128 0.95248331
0.00000000 0.00000000 0.00000000 0.03083585 0.23797733 0.66505143 0.87514459 0.90805992 0.92609843 0.94114991 0.95359576
0.00000000 0.00000000 0.00000000 0.03081815 0.23842987 0.66380981 0.87752477 0.91026869 0.92803673 0.94286046 0.95511021
0.00000000 0.00000000 0.00000000 0.03080688 0.23887923 0.66258875 0.88003216 0.91261961 0.93012067 0.94471824 0.95677313
0.00000000 0.00000000 0.00000000 0.03080283 0.23932624 0.66138836 0.88221397 0.91464928 0.93188704 0.94626206 0.95812586
0.00000000 0.00000000 0.00000000 0.03080445 0.23976996 0.66020646 0.88404235 0.91632713 0.93330464 0.94746024 0.95913628
0.00000000 0.00000000 0.00000000 0.03081291 0.24021174 0.65904353 0.88587207 0.91801654 0.93473807 0.94867715 0.96016814
0.00000000 0.00000000 0.00000000 0.03082631 0.24065020 0.65789712 0.88723529 0.91923618 0.93570436 0.94943020 0.96073970
0.00000000 0.00000000 0.00000000 0.03084405 0.24108587 0.65676712 0.88872525 0.92059334 0.93681174 0.95032614 0.96145557
0.00000000 0.00000000 0.00000000 0.03086563 0.24151782 0.65565395 0.89083680 0.92259543 0.93856768 0.95187046 0.96281869
0.00000000 0.00000000 0.00000000 0.03089328 0.24194722 0.65455795 0.89198152 0.92361676 0.93934698 0.95244489 0.96321953
0.00000000 0.00000000 0.00000000 0.03092757 0.24237472 0.65347758 0.89304975 0.92456678 0.94005912 0.95295543 0.96355960
0.00000000 0.00000000 0.00000000 0.03097088 0.24280306 0.65241606 0.89471818 0.92614123 0.94140207 0.95409947 0.96453486
0.00000000 0.00000000 0.00000000 0.03100937 0.24362134 0.65012849 0.89725906 0.92886073 0.94386848 0.95631245 0.96652736
0.00000000 0.00000000 0.00000000 0.03104786 0.24443962 0.64784091 0.89979994 0.93158022 0.94633489 0.95852543 0.96851987
0.00000000 0.00000000 0.00000000 0.03108636 0.24525790 0.64555334 0.90234083 0.93429972 0.94880130 0.96073840 0.97051238
0.00000000 0.00000000 0.00000000 0.03112485 0.24607618 0.64326576 0.90488171 0.93701921 0.95126772 0.96295138 0.97250488
0.00000000 0.00000000 0.00000000 0.03116334 0.24689446 0.64097819 0.90742259 0.93973871 0.95373413 0.96516436 0.97449739
0.00000000 0.00000000 0.00000000 0.03120183 0.24771274 0.63869061 0.90996347 0.94245820 0.95620054 0.96737733 0.97648989
0.00000000 0.00000000 0.00000000 0.03124032 0.24853103 0.63640303 0.91250435 0.94517770 0.95866695 0.96959031 0.97848240
0.00000000 0.00000000 0.00000000 0.03127882 0.24934931 0.63411546 0.91504523 0.94789719 0.96113336 0.97180329 0.98047490
0.00000000 0.00000000 0.00000000 0.03131731 0.25016759 0.63182788 0.91758611 0.95061669 0.96359977 0.97401626 0.98246741
0.00000000 0.00000000 0.00000000 0.03135580 0.25098587 0.62954031 0.92012699 0.95333618 0.96606618 0.97622924 0.98445992
0.00000000 0.00000000 0.00000000 0.03139429 0.25180415 0.62725273 0.92266787 0.95605568 0.96853259 0.97844222 0.98645242
0.00000000 0.00000000 0.00000000 0.03143279 0.25262243 0.62496516 0.92520875 0.95877517 0.97099900 0.98065519 0.98844493
0.00000000 0.00000000 0.00000000 0.03147128 0.25344071 0.62267758 0.92774963 0.96149466 0.97346541 0.98286817 0.99043743
0.00000000 0.00000000 0.00000000 0.03150977 0.25425900 0.62039001 0.93029051 0.96421416 0.97593182 0.98508115 0.99242994
0.00000000 0.00000000 0.00000000 0.03154826 0.25507728 0.61810243 0.93283139 0.96693365 0.97839823 0.98729412 0.99442244
0.00000000 0.00000000 0.00000000 0.03158676 0.25589556 0.61581485 0.93537227 0.96965315 0.98086464 0.98950710 0.99641495
0.00000000 0.00000000 0.00000000 0.03162525 0.25671384 0.61352728 0.93791315 0.97237264 0.98333105 0.99172008 0.99840746
0.00000000 0.00000000 0.00000000 0.03166374 0.25753212 0.61123970 0.94045403 0.97509214 0.98579746 0.99393305 1.00039996
0.00000000 0.00000000 0.00000000 0.03170223 0.25835040 0.60895213 0.94299492 0.97781163 0.98826387 0.99614603 1.00239247
0.00000000 0.00000000 0.00000000 0.03174072 0.25916868 0.60666455 0.94553580 0.98053113 0.99073028 0.99835901 1.00438497
0.00000000 0.00000000 0.00000000 0.03195075 0.25943600 0.60621904 0.94717646 0.98219768 0.99225968 0.99976383 1.00568873
0.00000000 0.00000000 0.00000000 0.03215739 0.25969959 0.60578135 0.94840079 0.98344045 0.99336935 1.00075319 1.00658149
0.00000000 0.00000000 0.00000000 0.03235689 0.25995504 0.60534671 0.94968187 0.98474280 0.99453859 1.00180108 1.00753119
0.00000000 0.00000000 0.00000000 0.03255838 0.26021318 0.60492407 0.95027472 0.98534448 0.99501626 1.00216765 1.00781034
0.00000000 0.00000000 0.00000000 0.03275753 0.26046852 0.60450674 0.95065411 0.98572874 0.99528048 1.00232456 1.00788348
0.00000000 0.00000000 0.00000000 0.03295124 0.26071762 0.60409193 0.95152203 0.98661718 0.99604927 1.00298423 1.00845638
0.00000000 0.00000000 0.00000000 0.03313659 0.26095712 0.60367736 0.95246598 0.98758232 0.99689308 1.00371627 1.00909847
0.00000000 0.00000000 0.00000000 0.03331944 0.26119387 0.60326881 0.95302832 0.98815715 0.99735064 1.00406656 1.00936345
0.00000000 0.00000000 0.00000000 0.03350025 0.26142811 0.60286512 0.95321904 0.98835078 0.99743095 1.00404403 1.00926018
0.00000000 0.00000000 0.00000000 0.03367882 0.26165971 0.60246609 0.95373443 0.98888160 0.99785141 1.00436293 1.00949870
0.00000000 0.00000000 0.00000000 0.03385201 0.26188905 0.60207240 0.95427779 0.98944378 0.99830646 1.00471895 1.00977639
0.00000000 0.00000000 0.00000000 0.03402244 0.26211566 0.60168361 0.95469336 0.98987636 0.99863527 1.00495186 1.00993388
0.00000000 0.00000000 0.00000000 0.03418588 0.26233458 0.60129464 0.95503691 0.99023223 0.99888652 1.00510606 1.01001127
0.00000000 0.00000000 0.00000000 0.03434318 0.26254627 0.60090553 0.95523436 0.99043500 0.99898426 1.00510633 1.00993413
0.00000000 0.00000000 0.00000000 0.03449840 0.26275544 0.60051986 0.95508155 0.99027716 0.99872500 1.00475379 1.00950856
0.00000000 0.00000000 0.00000000 0.03465169 0.26296215 0.60013689 0.95482740 0.99001515 0.99836471 1.00430326 1.00898779
0.00000000 0.00000000 0.00000000 0.03480274 0.26316600 0.59975675 0.95502423 0.99021967 0.99847294 1.00432135 1.00893465
0.00000000 0.00000000 0.00000000 0.03494780 0.26336268 0.59937658 0.95551816 0.99072918 0.99888494 1.00464060 1.00917924
0.00000000 0.00000000 0.00000000 0.03508681 0.26355221 0.59899586 0.95539558 0.99059918 0.99865743 1.00432194 1.00878820
0.00000000 0.00000000 0.00000000 0.03522396 0.26373937 0.59861917 0.95602061 0.99124373 0.99920636 1.00477875 1.00917009
0.00000000 0.00000000 0.00000000 0.03535943 0.26392422 0.59824855 0.95720156 0.99246650 1.00033570 1.00581582 1.01013089
0.00000000 0.00000000 0.00000000 0.03549320 0.26410678 0.59788442 0.95814685 0.99344942 1.00122821 1.00661937 1.01086154
0.00000000 0.00000000 0.00000000 0.03562498 0.26428687 0.59752646 0.95921449 0.99456243 1.00225339 1.00755726 1.01172766
0.00000000 0.00000000 0.00000000 0.03575515 0.26446476 0.59717512 0.96040026 0.99580134 1.00340697 1.00862517 1.01272493
0.00000000 0.00000000 0.00000000 0.03588374 0.26464048 0.59683071 0.96170132 0.99716344 1.00468618 1.00982027 1.01385045
0.00000000 0.00000000 0.00000000 0.03601035 0.26481411 0.59649354 0.96311100 0.99864200 1.00608425 1.01113578 1.01509743
0.00000000 0.00000000 0.00000000 0.03613190 0.26498592 0.59616371 0.96445241 1.00005383 1.00741808 1.01238927 1.01628445
0.00000000 0.00000000 0.00000000 0.03624493 0.26514754 0.59583376 0.96607024 1.00174866 1.00903025 1.01391512 1.01773716
0.00000000 0.00000000 0.00000000 0.03635509 0.26530567 0.59551037 0.96768126 1.00343976 1.01064003 1.01543948 1.01918902
0.00000000 0.00000000 0.00000000 0.03646985 0.26546885 0.59520112 0.96906140 1.00490228 1.01202986 1.01675275 1.02043870
0.00000000 0.00000000 0.00000000 0.03658344 0.26563013 0.59489878 0.97036996 1.00629403 1.01335123 1.01799965 1.02162394
0.00000000 0.00000000 0.00000000 0.03669126 0.26578440 0.59459891 0.97196490 1.00798157 1.01496619 1.01953658 1.02309491
0.00000000 0.00000000 0.00000000 0.03679568 0.26593454 0.59430440 0.97346078 1.00956832 1.01648085 1.02097360 1.02446632
0.00000000 0.00000000 0.00000000 0.03689878 0.26608282 0.59401709 0.97492518 1.01112598 1.01796868 1.02238573 1.02581455
0.00000000 0.00000000 0.00000000 0.03700066 0.26622931 0.59373683 0.97636338 1.01265985 1.01943489 1.02377809 1.02714467
0.00000000 0.00000000 0.00000000 0.03710135 0.26637404 0.59346315 0.97756399 1.01395028 1.02065995 1.02493205 1.02823926
0.00000000 0.00000000 0.00000000 0.03720088 0.26651690 0.59319481 0.97840609 1.01487058 1.02151686 1.02572078 1.02897191
0.00000000 0.00000000 0.00000000 0.03729402 0.26665287 0.59292694 0.97947290 1.01602107 1.02260148 1.02673364 1.02992452
0.00000000 0.00000000 0.00000000 0.03738108 0.26678345 0.59266149 0.98071172 1.01734897 1.02386225 1.02792048 1.03104846
0.00000000 0.00000000 0.00000000 0.03748431 0.26693365 0.59242203 0.98187933 1.01862432 1.02509020 1.02909390 1.03217808
0.00000000 0.00000000 0.00000000 0.03758534 0.26708071 0.59218670 0.98293454 1.01978313 1.02620189 1.03015142 1.03319213
0.00000000 0.00000000 0.00000000 0.03768280 0.26722387 0.59195444 0.98384183 1.02078763 1.02715906 1.03105451 1.03405180
0.00000000 0.00000000 0.00000000 0.03777708 0.26736329 0.59172491 0.98460834 1.02164502 1.02796903 1.03181060 1.03476469
0.00000000 0.00000000 0.00000000 0.03786802 0.26749879 0.59149743 0.98523547 1.02235618 1.02863249 1.03242020 1.03533111
0.00000000 0.00000000 0.00000000 0.03795576 0.26763060 0.59127171 0.98572974 1.02292772 1.02915623 1.03289027 1.03575821
0.00000000 0.00000000 0.00000000 0.03804041 0.26775878 0.59104739 0.98609207 1.02336035 1.02954098 1.03322164 1.03604688
0.00000000 0.00000000 0.00000000 0.03812237 0.26788355 0.59082419 0.98632459 1.02365615 1.02978898 1.03341671 1.03619969
0.00000000 0.00000000 0.00000000 0.03820095 0.26800453 0.59060076 0.98608808 1.02346154 1.02954655 1.03312299 1.03586600
0.00000000 0.00000000 0.00000000 0.03827734 0.26812254 0.59037664 0.98555006 1.02295042 1.02898816 1.03251501 1.03522004
0.00000000 0.00000000 0.00000000 0.03835137 0.26823752 0.59015071 0.98466020 1.02206963 1.02806061 1.03153974 1.03420907
0.00000000 0.00000000 0.00000000 0.03842361 0.26835024 0.58992404 0.98434591 1.02178421 1.02772875 1.03115826 1.03378874
0.00000000 0.00000000 0.00000000 0.03849450 0.26846115 0.58969873 0.98452643 1.02201213 1.02791101 1.03128970 1.03387905
0.00000000 0.00000000 0.00000000 0.03857671 0.26858467 0.58948918 0.98479199 1.02234077 1.02820688 1.03154704 1.03410709
0.00000000 0.00000000 0.00000000 0.03865874 0.26870747 0.58928404 0.98578054 1.02342265 1.02925728 1.03255722 1.03508474
0.00000000 0.00000000 0.00000000 0.03873939 0.26882850 0.58908393 0.98705756 1.02480621 1.03061004 1.03386912 1.03636276
0.00000000 0.00000000 0.00000000 0.03881841 0.26894758 0.58888866 0.98808661 1.02593293 1.03170653 1.03492611 1.03738748
0.00000000 0.00000000 0.00000000 0.03889528 0.26906428 0.58869661 0.98862143 1.02654514 1.03228878 1.03547101 1.03790297
0.00000000 0.00000000 0.00000000 0.03896998 0.26917861 0.58850657 0.98889588 1.02688525 1.03259919 1.03574526 1.03814930
0.00000000 0.00000000 0.00000000 0.03904254 0.26929059 0.58831824 0.98926306 1.02732075 1.03300510 1.03611470 1.03849012
0.00000000 0.00000000 0.00000000 0.03911298 0.26940024 0.58813127 0.98933311 1.02744537 1.03310036 1.03617489 1.03852346
0.00000000 0.00000000 0.00000000 0.03918132 0.26950756 0.58794466 0.98907215 1.02722308 1.03284895 1.03589001 1.03821375
0.00000000 0.00000000 0.00000000 0.03924759 0.26961255 0.58775805 0.98892137 1.02711325 1.03271008 1.03571732 1.03801548
0.00000000 0.00000000 0.00000000 0.03931178 0.26971522 0.58757119 0.98852236 1.02674234 1.03231034 1.03528501 1.03755914
0.00000000 0.00000000 0.00000000 0.03937391 0.26981557 0.58738356 0.98804852 1.02629073 1.03183002 1.03477262 1.03702316
0.00000000 0.00000000 0.00000000 0.03943399 0.26991357 0.58719528 0.98772341 1.02599160 1.03150220 1.03441222 1.03663820
0.00000000 0.00000000 0.00000000 0.03949201 0.27000923 0.58700640 0.98730594 1.02559380 1.03107585 1.03395383 1.03615582
0.00000000 0.00000000 0.00000000 0.03954798 0.27010252 0.58681643 0.98667903 1.02497496 1.03042860 1.03327567 1.03545501
0.00000000 0.00000000 0.00000000 0.03960186 0.27019342 0.58662556 0.98639839 1.02471484 1.03014001 1.03295473 1.03510917
0.00000000 0.00000000 0.00000000 0.03965362 0.27028189 0.58643496 0.98652166 1.02487463 1.03027129 1.03305194 1.03517885
0.00000000 0.00000000 0.00000000 0.03970325 0.27036789 0.58624586 0.98706076 1.02546790 1.03083605 1.03358083 1.03567748
0.00000000 0.00000000 0.00000000 0.03975068 0.27045137 0.58605852 0.98737730 1.02582884 1.03116858 1.03387850 1.03594623
0.00000000 0.00000000 0.00000000 0.03979586 0.27053227 0.58587242 0.98764572 1.02613915 1.03145054 1.03412588 1.03616492
0.00000000 0.00000000 0.00000000 0.03983870 0.27061052 0.58568719 0.98776814 1.02629646 1.03157960 1.03422108 1.03623229
0.00000000 0.00000000 0.00000000 0.03987909 0.27068600 0.58550210 0.98763579 1.02618673 1.03144174 1.03405059 1.03603558
0.00000000 0.00000000 0.00000000 0.03991692 0.27075861 0.58531690 0.98765816 1.02623746 1.03146440 1.03404002 1.03599775
0.00000000 0.00000000 0.00000000 0.03995203 0.27082819 0.58513120 0.98735341 1.02594533 1.03114434 1.03368833 1.03562091
0.00000000 0.00000000 0.00000000 0.03998492 0.27089497 0.58494412 0.98672842 1.02531686 1.03048821 1.03300231 1.03491196
0.00000000 0.00000000 0.00000000 0.04001447 0.27095802 0.58475434 0.98602923 1.02460834 1.02975190 1.03223636 1.03412334
0.00000000 0.00000000 0.00000000 0.04004090 0.27101767 0.58456293 0.98585069 1.02444246 1.02955844 1.03201122 1.03387232
0.00000000 0.00000000 0.00000000 0.04010371 0.27109087 0.58437852 0.98613289 1.02475557 1.02984305 1.03226160 1.03409348
0.00000000 0.00000000 0.00000000 0.04021038 0.27118117 0.58420341 0.98635792 1.02500694 1.03006531 1.03244973 1.03425271
0.00000000 0.00000000 0.00000000 0.04033610 0.27127812 0.58403337 0.98644763 1.02511737 1.03014775 1.03249993 1.03427613
0.00000000 0.00000000 0.00000000 0.04049176 0.27138624 0.58386993 0.98660491 1.02529794 1.03030087 1.03262130 1.03437109
0.00000000 0.00000000 0.00000000 0.04068953 0.27151032 0.58371490 0.98693771 1.02566036 1.03063526 1.03292295 1.03464509
0.00000000 0.00000000 0.00000000 0.04094724 0.27165692 0.58357135 0.98722659 1.02597526 1.03092177 1.03317707 1.03487214
0.00000000 0.00000000 0.00000000 0.04128537 0.27183400 0.58344396 0.98732044 1.02608724 1.03100796 1.03323491 1.03490751
0.00000000 0.00009010 0.00000000 0.04171443 0.27204490 0.58333647 0.98729478 1.02608059 1.03098317 1.03319036 1.03484938
0.00000000 0.00087646 0.00000000 0.04223263 0.27229064 0.58325431 0.98731902 1.02614186 1.03104227 1.03324547 1.03490645
0.00000000 0.00141059 0.00000000 0.04282832 0.27257612 0.58320443 0.98754870 1.02644083 1.03136136 1.03358169 1.03526506
0.00000000 0.00168541 0.00000000 0.04346514 0.27288449 0.58317745 0.98745402 1.02641986 1.03137923 1.03363639 1.03536204
0.00000000 0.00238819 0.00000000 0.04412872 0.27320949 0.58316837 0.98715267 1.02619982 1.03121472 1.03352577 1.03531062
0.00000000 0.00346631 0.00110048 0.04487278 0.27356615 0.58318377 0.98683194 1.02597500 1.03106155 1.03344244 1.03530206
0.00000000 0.00459965 0.00277293 0.04574477 0.27398227 0.58324330 0.98641874 1.02567640 1.03085896 1.03333447 1.03529351
0.00000000 0.00588150 0.00472189 0.04677288 0.27447545 0.58335801 0.98567110 1.02505156 1.03035663 1.03295509 1.03504230
0.00000000 0.00743607 0.00696764 0.04796477 0.27505125 0.58353146 0.98463322 1.02414583 1.02959989 1.03234941 1.03459322
0.00000000 0.00913240 0.00949771 0.04930705 0.27570507 0.58376340 0.98323324 1.02288407 1.02851394 1.03144312 1.03387245
0.00000000 0.01017700 0.01207830 0.05078200 0.27643708 0.58405642 0.98175533 1.02156469 1.02739820 1.03053515 1.03317777
0.00000000 0.01062943 0.01458271 0.05236536 0.27724163 0.58440498 0.98006635 1.02004171 1.02610097 1.02946879 1.03234769
0.00000000 0.01079055 0.01696167 0.05401540 0.27809868 0.58479277 0.97812091 1.01825978 1.02455943 1.02817385 1.03130455
0.00000000 0.01042438 0.01908512 0.05568964 0.27898635 0.58520279 0.97603459 1.01633445 1.02288354 1.02675385 1.03014506
0.00000000 0.00939751 0.02078583 0.05732726 0.27987593 0.58561439 0.97388965 1.01434747 1.02114975 1.02527925 1.02893318
0.00000000 0.00825423 0.02205170 0.05886302 0.28072987 0.58599963 0.97164916 1.01225395 1.01930589 1.02369023 1.02760128
0.00000000 0.00746241 0.02302812 0.06026866 0.28152080 0.58633779 0.96941268 1.01015498 1.01744850 1.02207789 1.02623462
0.00000000 0.00686829 0.02378080 0.06157014 0.28225239 0.58662935 0.96726331 1.00813758 1.01566424 1.02052831 1.02491862
0.00000000 0.00672610 0.02446042 0.06277741 0.28290764 0.58685480 0.96531533 1.00631321 1.01405585 1.01913503 1.02373738
0.00000000 0.00698218 0.02521887 0.06396593 0.28353497 0.58705253 0.96370272 1.00483633 1.01279118 1.01807895 1.02288508
0.00000000 0.00763883 0.02616725 0.06518681 0.28415805 0.58723877 0.96243026 1.00371645 1.01188386 1.01737807 1.02238422
0.00000000 0.00863275 0.02738974 0.06648510 0.28479793 0.58742746 0.96133175 1.00278179 1.01116459 1.01686662 1.02207322
0.00000000 0.00982212 0.02894412 0.06788877 0.28546802 0.58762822 0.96003687 1.00164496 1.01024742 1.01616204 1.02157379
0.00000000 0.01090005 0.03070938 0.06940309 0.28617515 0.58784730 0.95845608 1.00021445 1.00904359 1.01517871 1.02080366
0.00000000 0.01228908 0.03272780 0.07102209 0.28691799 0.58808457 0.95652878 0.99842756 1.00749140 1.01385610 1.01970353
0.00000000 0.01324406 0.03481869 0.07268172 0.28767074 0.58832966 0.95417667 0.99620548 1.00551410 1.01211905 1.01819968
0.00000000 0.01309323 0.03665487 0.07432534 0.28841192 0.58857190 0.95169598 0.99386213 1.00342739 1.01028298 1.01660629
0.00000000 0.01231748 0.03816207 0.07594545 0.28913972 0.58880504 0.94915648 0.99146662 1.00129691 1.00840983 1.01498147
0.00000000 0.01166077 0.03931997 0.07748105 0.28982356 0.58900715 0.94658604 0.98904571 0.99914554 1.00651797 1.01333869
0.00000000 0.01130893 0.04025079 0.07887031 0.29042310 0.58915308 0.94378242 0.98638512 0.99675530 1.00438600 1.01145319
0.00000000 0.01063420 0.04084161 0.08656611 0.29095141 0.59053305 0.94077768 0.98351903 0.99416283 1.00205400 1.00937126
0.00000000 0.01000889 0.04113839 0.09298499 0.29667274 0.59166728 0.93780934 0.98068405 0.99160905 0.99976447 1.00732601
0.00000000 0.00920049 0.04122624 0.09797165 0.30176938 0.59254639 0.93508554 0.97810903 0.98931914 0.99773863 1.00553992
0.00000000 0.00907046 0.04127286 0.10104602 0.30620339 0.59309675 0.93255982 0.97574634 0.98724205 0.99592251 1.00395911
0.00000000 0.00947674 0.04161626 0.10167652 0.30991493 0.59310664 0.93017384 0.97353256 0.98531283 0.99425074 1.00251826
0.00000000 0.00974603 0.04208586 0.10232548 0.31277202 0.59299438 0.92794850 0.97149368 0.98355996 0.99275421 1.00125070
0.00000000 0.01015822 0.04254661 0.10291282 0.31430787 0.59283553 0.92540058 0.96912339 0.98147741 0.99092844 0.99965319
0.00000000 0.00977829 0.04268000 0.10336617 0.31422243 0.59261183 0.92272506 0.96663283 0.97927950 0.98898892 0.99794192
0.00000000 0.00952593 0.04268647 0.10786437 0.31403770 0.59231717 0.91989598 0.96399002 0.97693766 0.98690529 0.99608465
0.00000000 0.00884430 0.04246573 0.11046973 0.31377655 0.59480798 0.91731570 0.96161427 0.97487520 0.98509927 0.99450139
0.00000000 0.00833537 0.04206798 0.11044921 0.31342312 0.59711226 0.91478224 0.95929219 0.97286852 0.98334781 0.99296976
0.00000000 0.00825413 0.04144893 0.11017349 0.31295019 0.59916977 0.91203084 0.95674426 0.97063801 0.98137118 0.99120984
0.00000000 0.00778926 0.04060366 0.10966046 0.31231755 0.60171661 0.90941287 0.95435164 0.96856628 0.97955141 0.98960236
0.00000000 0.00708958 0.03947619 0.10894814 0.31154366 0.60406877 0.90686653 0.95204511 0.96658535 0.97782259 0.98808378
0.00000000 0.00718064 0.03859989 0.10823004 0.31071076 0.60634159 0.90475179 0.95019841 0.96506472 0.97655149 0.98701895
0.00000000 0.00888404 0.03843832 0.10757040 0.30983557 0.60843071 0.90258548 0.94829807 0.96349046 0.97522484 0.98589578
0.00000000 0.01029843 0.03904415 0.10700833 0.30892517 0.61038021 0.90052356 0.94651839 0.96204353 0.97402940 0.98490673
0.00000000 0.01032403 0.03985052 0.10660124 0.30802707 0.61220158 0.89849408 0.94478753 0.96065799 0.97290572 0.98399926
0.00000000 0.01094879 0.04082908 0.10631346 0.30713531 0.61383517 0.89622582 0.94281549 0.95904150 0.97155960 0.98287746
0.00000000 0.01120296 0.04198053 0.10616349 0.30625339 0.61532525 0.89391756 0.94080980 0.95739840 0.97019224 0.98173928
0.00000000 0.01157327 0.04321073 0.10615404 0.30538536 0.61664830 0.89144181 0.93863209 0.95558789 0.96866096 0.98044033
0.00000000 0.01219275 0.04461230 0.10621119 0.30449339 0.61778071 0.88875423 0.93623670 0.95356324 0.96691736 0.97893019
0.00000000 0.01274463 0.04599752 0.11061290 0.30355972 0.61875440 0.88605064 0.93384446 0.95154693 0.96518351 0.97742985
0.00000000 0.01317278 0.05237131 0.11352821 0.30261780 0.61957725 0.88329584 0.93140934 0.94949305 0.96341514 0.97589725
0.00000000 0.01346983 0.05668158 0.11399316 0.30675121 0.62025025 0.88045260 0.92889548 0.94736707 0.96157862 0.97429957
0.00000000 0.01380448 0.05879482 0.11392637 0.31029036 0.62099399 0.87757727 0.92636971 0.94523572 0.95974008 0.97270202
0.00000000 0.01373645 0.05836889 0.11381689 0.31316656 0.62155703 0.87450900 0.92365941 0.94292721 0.95772822 0.97093374
0.00000000 0.01180930 0.05680457 0.11913667 0.31525951 0.62192056 0.87120558 0.92075924 0.94045566 0.95557197 0.96903736
0.00000000 0.00929220 0.05822273 0.12464427 0.31764280 0.62202398 0.86781326 0.91780898 0.93794980 0.95338728 0.96711413
0.00000000 0.01027163 0.05722213 0.12872238 0.31925474 0.62190642 0.86439474 0.91486222 0.93545363 0.95121173 0.96519622
0.00000000 0.00995289 0.05437815 0.13175059 0.32021663 0.62209455 0.86114195 0.91209160 0.93312881 0.94920044 0.96343391
0.00000000 0.00949056 0.05139494 0.13384636 0.32050658 0.62216105 0.85792397 0.90934518 0.93081927 0.94719602 0.96166977
0.00000000 0.00948326 0.04926142 0.13740301 0.31981477 0.62201963 0.85451547 0.90640359 0.92831123 0.94498752 0.95969464
0.00000000 0.00944184 0.04734325 0.13977095 0.31752994 0.62208835 0.85106439 0.90345266 0.92579470 0.94276740 0.95770290
0.00000000 0.00955679 0.04600171 0.14105748 0.31485115 0.62194496 0.84742176 0.90031753 0.92309395 0.94036052 0.95552073
0.00000000 0.00927994 0.04466171 0.14099782 0.31206874 0.62164463 0.84380725 0.89724370 0.92045700 0.93801628 0.95339851
0.00000000 0.00886667 0.04364779 0.13939689 0.30925168 0.62128189 0.84053974 0.89452919 0.91817981 0.93603013 0.95163179
0.00000000 0.00874409 0.04265221 0.13564911 0.30632031 0.62076024 0.83732376 0.89187363 0.91596322 0.93410311 0.94992135
0.00000000 0.00854468 0.04159431 0.13186279 0.30326789 0.62007598 0.83413468 0.88925468 0.91378636 0.93221562 0.94824883
0.00000000 0.00839315 0.04073900 0.12816104 0.30013438 0.61928891 0.83118061 0.88687941 0.91185320 0.93056948 0.94681418
0.00000000 0.00872880 0.04032670 0.12468435 0.29698282 0.61841588 0.82842111 0.88470042 0.91011342 0.92911318 0.94556543
0.00000000 0.00931297 0.04064156 0.12160691 0.29389480 0.61749462 0.82588173 0.88273546 0.90858080 0.92785861 0.94451353
0.00000000 0.01002593 0.04156041 0.11895954 0.29089550 0.61654277 0.82358635 0.88101044 0.90728224 0.92683388 0.94368802
0.00000000 0.01095944 0.04289751 0.11669028 0.28796945 0.61550317 0.82128184 0.87926784 0.90596009 0.92578128 0.94283124
0.00000000 0.01177969 0.04450121 0.11474307 0.28510024 0.61434701 0.81884184 0.87738083 0.90448856 0.92457585 0.94181900
0.00000000 0.01219237 0.04587600 0.11292716 0.28221828 0.61304374 0.81622085 0.87531415 0.90283801 0.92319143 0.94062797
0.00000000 0.01238696 0.04699819 0.11113365 0.27928085 0.61161368 0.81358276 0.87324483 0.90119049 0.92181323 0.93944579
0.00000000 0.01158221 0.04730554 0.10916060 0.27620090 0.61002349 0.81092864 0.87118040 0.89955589 0.92045153 0.93828218
0.00000000 0.00949496 0.04607528 0.10673112 0.27286416 0.60822862 0.80825598 0.86912703 0.89794388 0.91911705 0.93714747
0.00000000 0.00862394 0.04397526 0.10395093 0.26932443 0.60625221 0.80558105 0.86709463 0.89636102 0.91781457 0.93604541
0.00000000 0.00934535 0.04272498 0.10131697 0.26578284 0.60414464 0.80276464 0.86491133 0.89462133 0.91635055 0.93477749
0.00000000 0.01101273 0.04257651 0.09914957 0.26237921 0.60218298 0.79996468 0.86272513 0.89286793 0.91486476 0.93348177
0.00000000 0.01071392 0.04293283 0.10287791 0.25909060 0.60018767 0.79728021 0.86064843 0.89121699 0.91347708 0.93228021
0.00000000 0.01096138 0.04342910 0.10546700 0.25583296 0.59811202 0.79464231 0.85861753 0.88960926 0.91213066 0.93111841
0.00000000 0.01106714 0.04400008 0.10692449 0.25266356 0.59598681 0.79202308 0.85660491 0.88801892 0.91080219 0.92997637
0.00000000 0.01121464 0.04470868 0.10700238 0.24962105 0.59381989 0.78933321 0.85451529 0.88634915 0.90939430 0.92875685
0.00000000 0.01062856 0.04502402 0.10981930 0.24656335 0.59151251 0.78631312 0.85209869 0.88435299 0.90766002 0.92721120
0.00000000 0.00961952 0.04435206 0.11122534 0.24887811 0.59006924 0.78348462 0.84989286 0.88256799 0.90613486 0.92587113
0.00000000 0.00945552 0.04404199 0.11162839 0.25081534 0.58867232 0.78099468 0.84800460 0.88108906 0.90490841 0.92482343
0.00000000 0.00972708 0.04396251 0.11030655 0.25228787 0.58721128 0.77840231 0.84598581 0.87946617 0.90352952 0.92361645
0.00000000 0.01009864 0.04422367 0.10769008 0.25321268 0.58562547 0.77555781 0.84369036 0.87755543 0.90185530 0.92210785
0.00000000 0.01009314 0.04437081 0.11554658 0.25362931 0.58403124 0.77287105 0.84154101 0.87578153 0.90031098 0.92072272
0.00000000 0.01061144 0.04489572 0.12248516 0.25355391 0.58244955 0.77036105 0.83954660 0.87415098 0.89890324 0.91946904
0.00000000 0.01055715 0.04546734 0.12841606 0.25281306 0.58082774 0.76788518 0.83756980 0.87252940 0.89749928 0.91821513
0.00000000 0.01077533 0.04591192 0.13346849 0.25117128 0.57921750 0.76558504 0.83575589 0.87106359 0.89624684 0.91710967
0.00000000 0.01093368 0.04622482 0.13746664 0.24802684 0.57751137 0.76316164 0.83381303 0.86946569 0.89486065 0.91586971
0.00000000 0.01125150 0.04617120 0.14037541 0.24470455 0.57599418 0.76070776 0.83184238 0.86783879 0.89344337 0.91459604
0.00000000 0.01165407 0.04643782 0.14257879 0.24492258 0.57462391 0.75825508 0.82985982 0.86619236 0.89200238 0.91329606
0.00000000 0.01215244 0.04690391 0.14424499 0.24459988 0.57337209 0.75596548 0.82802655 0.86468741 0.89069959 0.91213311
0.00000000 0.01112301 0.04759914 0.14562323 0.24368144 0.57224821 0.75399483 0.82648729 0.86346567 0.88967621 0.91124896
0.00000000 0.01153605 0.04840212 0.14655373 0.24148325 0.57115204 0.75206159 0.82495687 0.86223952 0.88864218 0.91035096
0.00000000 0.01199231 0.04917641 0.14685434 0.23877826 0.57007295 0.75027260 0.82355276 0.86113057 0.88772069 0.90956267
0.00000000 0.01246079 0.04997740 0.14647135 0.23618304 0.56896690 0.74846193 0.82210637 0.85996899 0.88674111 0.90871286
0.00000000 0.01264804 0.05091029 0.14532327 0.23369813 0.56780880 0.74650946 0.82049500 0.85863122 0.88557959 0.90767756
0.00000000 0.01258379 0.05441814 0.14328899 0.23421265 0.56667836 0.74463195 0.81893822 0.85733834 0.88445779 0.90667886
0.00000000 0.01235489 0.05534144 0.13972834 0.23407167 0.56565767 0.74288102 0.81747813 0.85612824 0.88341238 0.90575329
0.00000000 0.01164285 0.05491856 0.13617572 0.23259977 0.56471888 0.74137763 0.81624341 0.85513266 0.88257661 0.90503470
0.00000000 0.01123516 0.05451986 0.13302500 0.23058182 0.56384944 0.74014857 0.81526289 0.85438087 0.88197941 0.90455118
0.00000000 0.01170028 0.05448572 0.13030396 0.22869710 0.56300673 0.73901417 0.81434785 0.85367937 0.88142411 0.90410327
0.00000000 0.01203744 0.05446314 0.12779524 0.22686986 0.56211129 0.73775249 0.81328422 0.85281770 0.88070204 0.90348370
0.00000000 0.01252174 0.05468255 0.12540825 0.22503684 0.56114115 0.73637605 0.81208989 0.85181595 0.87983386 0.90271318
0.00000000 0.01204216 0.05448324 0.12308703 0.22316631 0.56005171 0.73475061 0.81063556 0.85054767 0.87869399 0.90166587
0.00000000 0.01208405 0.05370577 0.12061848 0.22122137 0.55905380 0.73292378 0.80898109 0.84907741 0.87734996 0.90041216
0.00000000 0.01208114 0.05327149 0.11836815 0.22423237 0.55872348 0.73089307 0.80710407 0.84737466 0.87576801 0.89891706
0.00000000 0.01319262 0.05252537 0.12250094 0.22953053 0.55861679 0.72903691 0.80538638 0.84582401 0.87433412 0.89756711
0.00000000 0.01267271 0.05176979 0.12568715 0.23444761 0.55857746 0.72739141 0.80386039 0.84445719 0.87308043 0.89639532
0.00000000 0.01197670 0.05108469 0.12799218 0.23901409 0.55862137 0.72598290 0.80254962 0.84329613 0.87202794 0.89542183
0.00000000 0.01166676 0.05061309 0.12940604 0.24325420 0.55878543 0.72493025 0.80157501 0.84246187 0.87129756 0.89476713
0.00000000 0.01114004 0.05051888 0.12990732 0.24719995 0.55907267 0.72419066 0.80088878 0.84190402 0.87083763 0.89437872
0.00000000 0.01066224 0.05050459 0.12884951 0.25078674 0.55943146 0.72365713 0.80038653 0.84151884 0.87054413 0.89415209
0.00000000 0.01048867 0.04997535 0.12596258 0.25381926 0.55973346 0.72311930 0.79987140 0.84111503 0.87022787 0.89389862
0.00000000 0.01034259 0.04870579 0.12280240 0.25616968 0.55989564 0.72244729 0.79922364 0.84057724 0.86977524 0.89350557
0.00000000 0.01042042 0.04760759 0.11972072 0.25800032 0.56001689 0.72175318 0.79854525 0.84000367 0.86928401 0.89307200
0.00000000 0.01020977 0.04682758 0.11684544 0.25936290 0.56011773 0.72100222 0.79779749 0.83935448 0.86871472 0.89255987
0.00000000 0.00997750 0.04623790 0.11426726 0.26029607 0.56024336 0.72027949 0.79705810 0.83870416 0.86814010 0.89204051
0.00000000 0.00985172 0.04591486 0.11203173 0.26079978 0.56041844 0.71961863 0.79635680 0.83808048 0.86758699 0.89154019
0.00000000 0.00914207 0.04518968 0.10984937 0.26068750 0.56064748 0.71918181 0.79587236 0.83766928 0.86724446 0.89124940
0.00000000 0.00926866 0.04422417 0.10762815 0.25971859 0.56085431 0.71879260 0.79542758 0.83729231 0.86693295 0.89098708
0.00000000 0.00910520 0.04321439 0.10537650 0.25726366 0.56105401 0.71850711 0.79508142 0.83700980 0.86671352 0.89081495
0.00000000 0.00927524 0.04252770 0.10330979 0.25446793 0.56127338 0.71828874 0.79478725 0.83677096 0.86653378 0.89068041
0.00000000 0.00925490 0.04224016 0.10154172 0.25185422 0.56154040 0.71814275 0.79454461 0.83657282 0.86638996 0.89057953
0.00000000 0.00939124 0.04200688 0.09991804 0.24935894 0.56182896 0.71805817 0.79434933 0.83641413 0.86628187 0.89051251
0.00000000 0.01015442 0.04214713 0.09844737 0.24698280 0.56208840 0.71786219 0.79402427 0.83611573 0.86602911 0.89029808
0.00000000 0.01025543 0.04251032 0.09712582 0.24472759 0.56227081 0.71737388 0.79338437 0.83549141 0.86544501 0.88974961
0.00000000 0.00952018 0.04249987 0.09596817 0.24261172 0.56245083 0.71680064 0.79264158 0.83475850 0.86474923 0.88908751
0.00000000 0.01096606 0.04229916 0.10130047 0.24063930 0.56260462 0.71606858 0.79172182 0.83383906 0.86386228 0.88823180
0.00000000 0.01017264 0.05051008 0.10539379 0.23872201 0.56289561 0.71548436 0.79094797 0.83306282 0.86311697 0.88751650
0.00000000 0.00894057 0.05541205 0.10822151 0.23680046 0.56318613 0.71503111 0.79030528 0.83241685 0.86250159 0.88693104
0.00000000 0.00784700 0.05822949 0.10984985 0.23491124 0.56349576 0.71472685 0.78980613 0.83191055 0.86202396 0.88648196
0.00000000 0.00749289 0.05982468 0.11024628 0.23310944 0.56388083 0.71468400 0.78955957 0.83165139 0.86179092 0.88627603
0.00000000 0.00754134 0.06064872 0.10864321 0.23142520 0.56435304 0.71489318 0.78955317 0.83162524 0.86178762 0.88629801
0.00000000 0.00798910 0.06108043 0.10642898 0.22990280 0.56486475 0.71511882 0.78954090 0.83158124 0.86176051 0.88629263
0.00000000 0.00789571 0.06074573 0.10434079 0.22844613 0.56530015 0.71507718 0.78924234 0.83124044 0.86143057 0.88598026
0.00000000 0.00746685 0.05967516 0.10224321 0.22699433 0.56562816 0.71473216 0.78862674 0.83057489 0.86077121 0.88533502
0.00000000 0.00738355 0.06058566 0.10028707 0.22907376 0.56599448 0.71416803 0.78777719 0.82966796 0.85986529 0.88443884
0.00000000 0.00963418 0.06035863 0.09830091 0.23048635 0.56641806 0.71382423 0.78714718 0.82897803 0.85917448 0.88375593
0.00000000 0.00928589 0.05956911 0.09641579 0.23109798 0.56690759 0.71368906 0.78671892 0.82848560 0.85867932 0.88326783
0.00000000 0.00887941 0.05856632 0.09477005 0.23032928 0.56751778 0.71387603 0.78660169 0.82829788 0.85848633 0.88308088
0.00000000 0.00836692 0.05689641 0.09315372 0.22900968 0.56805728 0.71383616 0.78624279 0.82786005 0.85803820 0.88263519
0.00000000 0.00753102 0.05456738 0.09144761 0.22766444 0.56840884 0.71325930 0.78533230 0.82686252 0.85702466 0.88161950
0.00000000 0.00594212 0.05823701 0.08967347 0.22631335 0.56891741 0.71239891 0.78413200 0.82557081 0.85571295 0.88030143
0.00000000 0.00929076 0.06020070 0.08776551 0.22494162 0.57016614 0.71198217 0.78338521 0.82473554 0.85485870 0.87944105
0.00000000 0.00892168 0.06131661 0.08592112 0.22361389 0.57159758 0.71213656 0.78321218 0.82447542 0.85458130 0.87915927
0.00000000 0.00864355 0.06182078 0.08422355 0.22238851 0.57316124 0.71265517 0.78339796 0.82457159 0.85465985 0.87923418
0.00000000 0.00815268 0.06207127 0.08279277 0.22131876 0.57484949 0.71345922 0.78385474 0.82493165 0.85499931 0.87956866
0.00000000 0.00752960 0.06171784 0.08143783 0.22032489 0.57654043 0.71429077 0.78432530 0.82529778 0.85534017 0.87990099
0.00000000 0.00743268 0.06084068 0.08006130 0.21934642 0.57813121 0.71492935 0.78458795 0.82544694 0.85545747 0.88000396
0.00000000 0.00726111 0.05969835 0.07870187 0.21838914 0.57970850 0.71561060 0.78488581 0.82562605 0.85560087 0.88012966
0.00000000 0.00659070 0.05804281 0.07734068 0.21745900 0.58112429 0.71588823 0.78476568 0.82537961 0.85531405 0.87982191
0.00000000 0.00499834 0.05576206 0.07602060 0.21659652 0.58245954 0.71594225 0.78440717 0.82488796 0.85477843 0.87926341
0.00000000 0.00280014 0.05297534 0.07471730 0.21578947 0.58393706 0.71643995 0.78449040 0.82483612 0.85468151 0.87914262
0.00000000 0.00232098 0.04967743 0.07338445 0.21500525 0.58558930 0.71752275 0.78516030 0.82536883 0.85516677 0.87960100
0.00000000 0.00194724 0.04573552 0.07204695 0.21423940 0.58728431 0.71880975 0.78602525 0.82608853 0.85583222 0.88023270
0.00000000 0.00251306 0.04065962 0.07069239 0.21347145 0.58890148 0.71997685 0.78675668 0.82666378 0.85634405 0.88070201
0.00000000 0.00222903 0.03519398 0.06941912 0.21275074 0.59052958 0.72121264 0.78754753 0.82729097 0.85690221 0.88121268
0.00000000 0.00185005 0.03049525 0.06810297 0.21204420 0.59216372 0.72253489 0.78842290 0.82799884 0.85753770 0.88179760
0.00000000 0.00265876 0.02693939 0.06681302 0.21136219 0.59377090 0.72384521 0.78927979 0.82868137 0.85814223 0.88234652
0.00000000 0.00247554 0.02445241 0.06577546 0.21080899 0.59555230 0.72561724 0.79059738 0.82982166 0.85920321 0.88335143
0.00000000 0.00193908 0.02229418 0.06488755 0.21037302 0.59729053 0.72718918 0.79170221 0.83074190 0.86004045 0.88413087
0.00000000 0.00240025 0.02049302 0.06397188 0.20995505 0.59889018 0.72840323 0.79243590 0.83128155 0.86048979 0.88451622
0.00000000 0.00212379 0.01876335 0.06301939 0.20954229 0.60032788 0.72919185 0.79272937 0.83137158 0.86048234 0.88443873
0.00000000 0.00208941 0.01730515 0.06207102 0.20915285 0.60171023 0.72987188 0.79290511 0.83133694 0.86034464 0.88422619
0.00000000 0.00186801 0.01605465 0.06112575 0.20878317 0.60303697 0.73044297 0.79296342 0.83117847 0.86007795 0.88388020
0.00000000 0.00198866 0.01510124 0.06013049 0.20840438 0.60428371 0.73086415 0.79286694 0.83086030 0.85964790 0.88336713
0.00000000 0.00148315 0.01413091 0.05925484 0.20810314 0.60601497 0.73192182 0.79341260 0.83118798 0.85986479 0.88350141
0.00000000 0.00094459 0.01320913 0.05849263 0.20788957 0.60792376 0.73349584 0.79447714 0.83203283 0.86059763 0.88415080
0.00000000 0.00068835 0.01215030 0.05765493 0.20767211 0.60965477 0.73462992 0.79508824 0.83241488 0.86085973 0.88432235
0.00000000 0.00091918 0.01113011 0.05671804 0.20741661 0.61123261 0.73544324 0.79536756 0.83245600 0.86077217 0.88413585
0.00000000 0.00025581 0.01007937 0.05580692 0.20718847 0.61291951 0.73664920 0.79604039 0.83288687 0.86107020 0.88433070
0.00000000 0.00012732 0.00908820 0.05486982 0.20696464 0.61485908 0.73872507 0.79759790 0.83420252 0.86225051 0.88540414
0.00000000 0.00000000 0.00810325 0.05393721 0.20675753 0.61698998 0.74146423 0.79982877 0.83618916 0.86409767 0.88713952
0.00000000 0.00000000 0.00714440 0.05301058 0.20656931 0.61910169 0.74421138 0.80206260 0.83816986 0.86593034 0.88885223
0.00000000 0.00000000 0.00622683 0.05202282 0.20635803 0.62111371 0.74676926 0.80410047 0.83994449 0.86754677 0.89033877
0.00000000 0.00000000 0.00541607 0.05099352 0.20612723 0.62302212 0.74911878 0.80592594 0.84149914 0.86893543 0.89159010
0.00000000 0.00000000 0.00470831 0.04996428 0.20590087 0.62477362 0.75105290 0.80733049 0.84262745 0.86989300 0.89240659
0.00000000 0.00000000 0.00407997 0.04896370 0.20569850 0.62637225 0.75255369 0.80829703 0.84331482 0.87040766 0.89277941
0.00000000 0.00000000 0.00357398 0.04804122 0.20554777 0.62803040 0.75427937 0.80949582 0.84423587 0.87115698 0.89338824
0.00000000 0.00000000 0.00311920 0.04721094 0.20546056 0.62980290 0.75639490 0.81109448 0.84555887 0.87230953 0.89440180
0.00000000 0.00000000 0.00258077 0.04639917 0.20540565 0.63160246 0.75865543 0.81284365 0.84703162 0.87361042 0.89556248
0.00000000 0.00000000 0.00197270 0.04555665 0.20535198 0.63351683 0.76140467 0.81509461 0.84900617 0.87541073 0.89721945
0.00000000 0.00000000 0.00138063 0.04469577 0.20530042 0.63545709 0.76434746 0.81754645 0.85117920 0.87740561 0.89906687
0.00000000 0.00000000 0.00092763 0.04388410 0.20527803 0.63740133 0.76737375 0.82008618 0.85343740 0.87948233 0.90099306
0.00000000 0.00000000 0.00055169 0.04311652 0.20528772 0.63933997 0.77044684 0.82267981 0.85574927 0.88161178 0.90297133
0.00000000 0.00000000 0.00018415 0.04236141 0.20531627 0.64121767 0.77339052 0.82515037 0.85793864 0.88361868 0.90482743
0.00000000 0.00000000 0.00000000 0.04162503 0.20536799 0.64299334 0.77605111 0.82734165 0.85984953 0.88534780 0.90640718
0.00000000 0.00000000 0.00000000 0.04094125 0.20545719 0.64466263 0.77839030 0.82921325 0.86144153 0.88675918 0.90767129
0.00000000 0.00000000 0.00000000 0.04031970 0.20559336 0.64622320 0.78037871 0.83073501 0.86268544 0.88782487 0.90859319
0.00000000 0.00000000 0.00000000 0.03972576 0.20575904 0.64773365 0.78226057 0.83215669 0.86383248 0.88879635 0.90942399
0.00000000 0.00000000 0.00000000 0.03918016 0.20596418 0.64928491 0.78435873 0.83380738 0.86521388 0.89000617 0.91049703
0.00000000 0.00000000 0.00000000 0.03865854 0.20619784 0.65079342 0.78638031 0.83538915 0.86653002 0.89115363 0.91151092
0.00000000 0.00000000 0.00000000 0.03818489 0.20646608 0.65231303 0.78852190 0.83710328 0.86798409 0.89244330 0.91267127
0.00000000 0.00000000 0.00000000 0.03777127 0.20678113 0.65383464 0.79072652 0.83889383 0.86952200 0.89382321 0.91392842
0.00000000 0.00000000 0.00000000 0.03741448 0.20714416 0.65536956 0.79303946 0.84080674 0.87118971 0.89533923 0.91532802
0.00000000 0.00000000 0.00000000 0.03710772 0.20755241 0.65689619 0.79538312 0.84276178 0.87290558 0.89690851 0.91678614
0.00000000 0.00000000 0.00000000 0.03684437 0.20800280 0.65834630 0.79748617 0.84448015 0.87438797 0.89824758 0.91801787
0.00000000 0.00000000 0.00000000 0.03661426 0.20848803 0.65974243 0.79945647 0.84607011 0.87574443 0.89946283 0.91912820
0.00000000 0.00000000 0.00000000 0.03641753 0.20900750 0.66118678 0.80172967 0.84797535 0.87742025 0.90099977 0.92056205
0.00000000 0.00000000 0.00000000 0.03623594 0.20955454 0.66262756 0.80410832 0.84999221 0.87920841 0.90264869 0.92210730
0.00000000 0.00000000 0.00000000 0.03604005 0.21010810 0.66404800 0.80657721 0.85210261 0.88108745 0.90438455 0.92373513
0.00000000 0.00000000 0.00000000 0.03583525 0.21065900 0.66546188 0.80922915 0.85440047 0.88315042 0.90629906 0.92553569
0.00000000 0.00000000 0.00000000 0.03563924 0.21121758 0.66673644 0.81144030 0.85625001 0.88475972 0.90775503 0.92687349
0.00000000 0.00000000 0.00000000 0.03545234 0.21178625 0.66786434 0.81316149 0.85760077 0.88586550 0.90870343 0.92770048
0.00000000 0.00000000 0.00000000 0.03527361 0.21236304 0.66900506 0.81515038 0.85922593 0.88724482 0.90992263 0.92879490
0.00000000 0.00000000 0.00000000 0.03510257 0.21295210 0.67006596 0.81695824 0.86066704 0.88843668 0.91095079 0.92969493
0.00000000 0.00000000 0.00000000 0.03491692 0.21353904 0.67104617 0.81862209 0.86195923 0.88947389 0.91181805 0.93042789
0.00000000 0.00000000 0.00000000 0.03471365 0.21411400 0.67196255 0.82025888 0.86322077 0.89047388 0.91264046 0.93110822
0.00000000 0.00000000 0.00000000 0.03450801 0.21468155 0.67282873 0.82193312 0.86451936 0.89150620 0.91348926 0.93180871
0.00000000 0.00000000 0.00000000 0.03431577 0.21525397 0.67376849 0.82428793 0.86651497 0.89323650 0.91503366 0.93320102
0.00000000 0.00000000 0.00000000 0.03413507 0.21583772 0.67462462 0.82647643 0.86834387 0.89479747 0.91640575 0.93441835
0.00000000 0.00000000 0.00000000 0.03394051 0.21641796 0.67545945 0.82891405 0.87042730 0.89660902 0.91802257 0.93587391
0.00000000 0.00000000 0.00000000 0.03372908 0.21698530 0.67622471 0.83138204 0.87254035 0.89844302 0.91965337 0.93733479
0.00000000 0.00000000 0.00000000 0.03350862 0.21754070 0.67683665 0.83338121 0.87417420 0.89978946 0.92078863 0.93829292
0.00000000 0.00000000 0.00000000 0.03328979 0.21808917 0.67732354 0.83505874 0.87548130 0.90080427 0.92158727 0.93891000
0.00000000 0.00000000 0.00000000 0.03308204 0.21863571 0.67766590 0.83625784 0.87630332 0.90133099 0.92189523 0.93903470
0.00000000 0.00000000 0.00000000 0.03290217 0.21919537 0.67786639 0.83691255 0.87657430 0.90130655 0.92165287 0.93861106
0.00000000 0.00000000 0.00000000 0.03273932 0.22359775 0.67808285 0.83814132 0.87743477 0.90187456 0.92200344 0.93878002
0.00000000 0.00000000 0.00000000 0.03258643 0.22696011 0.67834110 0.84026688 0.87921427 0.90336120 0.92326879 0.93985799
0.00000000 0.00000000 0.00000000 0.03242879 0.22832877 0.67847244 0.84215783 0.88075593 0.90460510 0.92428586 0.94068252
0.00000000 0.00000000 0.00000000 0.03227629 0.22880795 0.67851912 0.84427018 0.88252830 0.90607793 0.92552822 0.94172814
0.00000000 0.00000000 0.00000000 0.03213689 0.22928885 0.67838395 0.84574785 0.88366036 0.90691095 0.92613161 0.94213693
0.00000000 0.00000000 0.00000000 0.03202414 0.22978122 0.67812718 0.84718339 0.88475842 0.90771353 0.92670713 0.94252049
0.00000000 0.00000000 0.00000000 0.03192231 0.23028143 0.67767906 0.84791852 0.88514829 0.90780958 0.92657856 0.94220380
0.00000000 0.00000000 0.00000000 0.03182358 0.23078128 0.67782879 0.84867670 0.88556437 0.90793112 0.92647518 0.94191112
0.00000000 0.00000000 0.00000000 0.03172838 0.23128218 0.67791714 0.84972452 0.88627833 0.90835077 0.92666799 0.94191207
0.00000000 0.00000000 0.00000000 0.03163196 0.23178003 0.67796271 0.85139816 0.88763476 0.90941237 0.92749861 0.94254595
0.00000000 0.00000000 0.00000000 0.03153676 0.23227476 0.67791390 0.85344294 0.88937563 0.91085816 0.92871047 0.94355762
0.00000000 0.00000000 0.00000000 0.03144496 0.23276657 0.67770036 0.85535987 0.89099169 0.91217851 0.92979548 0.94444109
0.00000000 0.00000000 0.00000000 0.03135983 0.23325760 0.67730160 0.85718071 0.89251714 0.91340928 0.93079102 0.94523522
0.00000000 0.00000000 0.00000000 0.03128064 0.23374680 0.67667175 0.85890884 0.89395546 0.91455381 0.93170029 0.94594306
0.00000000 0.00000000 0.00000000 0.03120621 0.23423252 0.67566653 0.86113495 0.89591193 0.91621793 0.93312735 0.94716625
0.00000000 0.00000000 0.00000000 0.03113863 0.23471469 0.67427351 0.86304143 0.89755305 0.91756824 0.93424206 0.94807877
0.00000000 0.00000000 0.00000000 0.03107734 0.23519260 0.67289999 0.86484046 0.89909519 0.91882129 0.93526033 0.94889568
0.00000000 0.00000000 0.00000000 0.03102195 0.23566619 0.67154533 0.86657640 0.90058307 0.92002180 0.93622672 0.94966129
0.00000000 0.00000000 0.00000000 0.03097209 0.23613548 0.67020934 0.86838822 0.90215869 0.92131206 0.93728322 0.95051719
0.00000000 0.00000000 0.00000000 0.03092823 0.23660088 0.66889217 0.87010332 0.90364569 0.92251598 0.93825476 0.95128944
0.00000000 0.00000000 0.00000000 0.03089122 0.23706320 0.66759379 0.87160081 0.90492028 0.92351034 0.93901910 0.95185695
0.00000000 0.00000000 0.00000000 0.03086016 0.23752177 0.66631313 0.87314188 0.90624879 0.92456132 0.93984128 0.95248331
0.00000000 0.00000000 0.00000000 0.03083585 0.23797733 0.66505143 0.87514459 0.90805992 0.92609843 0.94114991 0.95359576
0.00000000 0.00000000 0.00000000 0.03081815 0.23842987 0.66380981 0.87752477 0.91026869 0.92803673 0.94286046 0.95511021
0.00000000 0.00000000 0.00000000 0.03080688 0.23887923 0.66258875 0.88003216 0.91261961 0.93012067 0.94471824 0.95677313
0.00000000 0.00000000 0.00000000 0.03080283 0.23932624 0.66138836 0.88221397 0.91464928 0.93188704 0.94626206 0.95812586
0.00000000 0.00000000 0.00000000 0.03080445 0.23976996 0.66020646 0.88404235 0.91632713 0.93330464 0.94746024 0.95913628
0.00000000 0.00000000 0.00000000 0.03081291 0.24021174 0.65904353 0.88587207 0.91801654 0.93473807 0.94867715 0.96016814
0.00000000 0.00000000 0.00000000 0.03082631 0.24065020 0.65789712 0.88723529 0.91923618 0.93570436 0.94943020 0.96073970
0.00000000 0.00000000 0.00000000 0.03084405 0.24108587 0.65676712 0.88872525 0.92059334 0.93681174 0.95032614 0.96145557
0.00000000 0.00000000 0.00000000 0.03086563 0.24151782 0.65565395 0.89083680 0.92259543 0.93856768 0.95187046 0.96281869
0.00000000 0.00000000 0.00000000 0.03089328 0.24194722 0.65455795 0.89198152 0.92361676 0.93934698 0.95244489 0.96321953
0.00000000 0.00000000 0.00000000 0.03092757 0.24237472 0.65347758 0.89304975 0.92456678 0.94005912 0.95295543 0.96355960
0.00000000 0.00000000 0.00000000 0.03097088 0.24280306 0.65241606 0.89471818 0.92614123 0.94140207 0.95409947 0.96453486
0.00000000 0.00000000 0.00000000 0.03100937 0.24362134 0.65012849 0.89725906 0.92886073 0.94386848 0.95631245 0.96652736
0.00000000 0.00000000 0.00000000 0.03104786 0.24443962 0.64784091 0.89979994 0.93158022 0.94633489 0.95852543 0.96851987
0.00000000 0.00000000 0.00000000 0.03108636 0.24525790 0.64555334 0.90234083 0.93429972 0.94880130 0.96073840 0.97051238
0.00000000 0.00000000 0.00000000 0.03112485 0.24607618 0.64326576 0.90488171 0.93701921 0.95126772 0.96295138 0.97250488
0.00000000 0.00000000 0.00000000 0.03116334 0.24689446 0.64097819 0.90742259 0.93973871 0.95373413 0.96516436 0.97449739
0.00000000 0.00000000 0.00000000 0.03120183 0.24771274 0.63869061 0.90996347 0.94245820 0.95620054 0.96737733 0.97648989
0.00000000 0.00000000 0.00000000 0.03124032 0.24853103 0.63640303 0.91250435 0.94517770 0.95866695 0.96959031 0.97848240
0.00000000 0.00000000 0.00000000 0.03127882 0.24934931 0.63411546 0.91504523 0.94789719 0.96113336 0.97180329 0.98047490
0.00000000 0.00000000 0.00000000 0.03131731 0.25016759 0.63182788 0.91758611 0.95061669 0.96359977 0.97401626 0.98246741
0.00000000 0.00000000 0.00000000 0.03135580 0.25098587 0.62954031 0.92012699 0.95333618 0.96606618 0.97622924 0.98445992
0.00000000 0.00000000 0.00000000 0.03139429 0.25180415 0.62725273 0.92266787 0.95605568 0.96853259 0.97844222 0.98645242
0.00000000 0.00000000 0.00000000 0.03143279 0.25262243 0.62496516 0.92520875 0.95877517 0.97099900 0.98065519 0.98844493
0.00000000 0.00000000 0.00000000 0.03147128 0.25344071 0.62267758 0.92774963 0.96149466 0.97346541 0.98286817 0.99043743
0.00000000 0.00000000 0.00000000 0.03150977 0.25425900 0.62039001 0.93029051 0.96421416 0.97593182 0.98508115 0.99242994
0.00000000 0.00000000 0.00000000 0.03154826 0.25507728 0.61810243 0.93283139 0.96693365 0.97839823 0.98729412 0.99442244
0.00000000 0.00000000 0.00000000 0.03158676 0.25589556 0.61581485 0.93537227 0.96965315 0.98086464 0.98950710 0.99641495
0.00000000 0.00000000 0.00000000 0.03162525 0.25671384 0.61352728 0.93791315 0.97237264 0.98333105 0.99172008 0.99840746
0.00000000 0.00000000 0.00000000 0.03166374 0.25753212 0.61123970 0.94045403 0.97509214 0.98579746 0.99393305 1.00039996
0.00000000 0.00000000 0.00000000 0.03170223 0.25835040 0.60895213 0.94299492 0.97781163 0.98826387 0.99614603 1.00239247
0.00000000 0.00000000 0.00000000 0.03174072 0.25916868 0.60666455 0.94553580 0.98053113 0.99073028 0.99835901 1.00438497
0.00000000 0.00000000 0.00000000 0.03195075 0.25943600 0.60621904 0.94717646 0.98219768 0.99225968 0.99976383 1.00568873
0.00000000 0.00000000 0.00000000 0.03215739 0.25969959 0.60578135 0.94840079 0.98344045 0.99336935 1.00075319 1.00658149
0.00000000 0.00000000 0.00000000 0.03235689 0.25995504 0.60534671 0.94968187 0.98474280 0.99453859 1.00180108 1.00753119
0.00000000 0.00000000 0.00000000 0.03255838 0.26021318 0.60492407 0.95027472 0.98534448 0.99501626 1.00216765 1.00781034
0.00000000 0.00000000 0.00000000 0.03275753 0.26046852 0.60450674 0.95065411 0.98572874 0.99528048 1.00232456 1.00788348
0.00000000 0.00000000 0.00000000 0.03295124 0.26071762 0.60409193 0.95152203 0.98661718 0.99604927 1.00298423 1.00845638
0.00000000 0.00000000 0.00000000 0.03313659 0.26095712 0.60367736 0.95246598 0.98758232 0.99689308 1.00371627 1.00909847
0.00000000 0.00000000 0.00000000 0.03331944 0.26119387 0.60326881 0.95302832 0.98815715 0.99735064 1.00406656 1.00936345
0.00000000 0.00000000 0.00000000 0.03350025 0.26142811 0.60286512 0.95321904 0.98835078 0.99743095 1.00404403 1.00926018
0.00000000 0.00000000 0.00000000 0.03367882 0.26165971 0.60246609 0.95373443 0.98888160 0.99785141 1.00436293 1.00949870
0.00000000 0.00000000 0.00000000 0.03385201 0.26188905 0.60207240 0.95427779 0.98944378 0.99830646 1.00471895 1.00977639
0.00000000 0.00000000 0.00000000 0.03402244 0.26211566 0.60168361 0.95469336 0.98987636 0.99863527 1.00495186 1.00993388
0.00000000 0.00000000 0.00000000 0.03418588 0.26233458 0.60129464 0.95503691 0.99023223 0.99888652 1.00510606 1.01001127
0.00000000 0.00000000 0.00000000 0.03434318 0.26254627 0.60090553 0.95523436 0.99043500 0.99898426 1.00510633 1.00993413
0.00000000 0.00000000 0.00000000 0.03449840 0.26275544 0.60051986 0.95508155 0.99027716 0.99872500 1.00475379 1.00950856
0.00000000 0.00000000 0.00000000 0.03465169 0.26296215 0.60013689 0.95482740 0.99001515 0.99836471 1.00430326 1.00898779
0.00000000 0.00000000 0.00000000 0.03480274 0.26316600 0.59975675 0.95502423 0.99021967 0.99847294 1.00432135 1.00893465
0.00000000 0.00000000 0.00000000 0.03494780 0.26336268 0.59937658 0.95551816 0.99072918 0.99888494 1.00464060 1.00917924
0.00000000 0.00000000 0.00000000 0.03508681 0.26355221 0.59899586 0.95539558 0.99059918 0.99865743 1.00432194 1.00878820
0.00000000 0.00000000 0.00000000 0.03522396 0.26373937 0.59861917 0.95602061 0.99124373 0.99920636 1.00477875 1.00917009
0.00000000 0.00000000 0.00000000 0.03535943 0.26392422 0.59824855 0.95720156 0.99246650 1.00033570 1.00581582 1.01013089
0.00000000 0.00000000 0.00000000 0.03549320 0.26410678 0.59788442 0.95814685 0.99344942 1.00122821 1.00661937 1.01086154
0.00000000 0.00000000 0.00000000 0.03562498 0.26428687 0.59752646 0.95921449 0.99456243 1.00225339 1.00755726 1.01172766
0.00000000 0.00000000 0.00000000 0.03575515 0.26446476 0.59717512 0.96040026 0.99580134 1.00340697 1.00862517 1.01272493
0.00000000 0.00000000 0.00000000 0.03588374 0.26464048 0.59683071 0.96170132 0.99716344 1.00468618 1.00982027 1.01385045
0.00000000 0.00000000 0.00000000 0.03601035 0.26481411 0.59649354 0.96311100 0.99864200 1.00608425 1.01113578 1.01509743
0.00000000 0.00000000 0.00000000 0.03613190 0.26498592 0.59616371 0.96445241 1.00005383 1.00741808 1.01238927 1.01628445
0.00000000 0.00000000 0.00000000 0.03624493 0.26514754 0.59583376 0.96607024 1.00174866 1.00903025 1.01391512 1.01773716
0.00000000 0.00000000 0.00000000 0.03635509 0.26530567 0.59551037 0.96768126 1.00343976 1.01064003 1.01543948 1.01918902
0.00000000 0.00000000 0.00000000 0.03646985 0.26546885 0.59520112 0.96906140 1.00490228 1.01202986 1.01675275 1.02043870
0.00000000 0.00000000 0.00000000 0.03658344 0.26563013 0.59489878 0.97036996 1.00629403 1.01335123 1.01799965 1.02162394
0.00000000 0.00000000 0.00000000 0.03669126 0.26578440 0.59459891 0.97196490 1.00798157 1.01496619 1.01953658 1.02309491
0.00000000 0.00000000 0.00000000 0.03679568 0.26593454 0.59430440 0.97346078 1.00956832 1.01648085 1.02097360 1.02446632
0.00000000 0.00000000 0.00000000 0.03689878 0.26608282 0.59401709 0.97492518 1.01112598 1.01796868 1.02238573 1.02581455
0.00000000 0.00000000 0.00000000 0.03700066 0.26622931 0.59373683 0.97636338 1.01265985 1.01943489 1.02377809 1.02714467
0.00000000 0.00000000 0.00000000 0.03710135 0.26637404 0.59346315 0.97756399 1.01395028 1.02065995 1.02493205 1.02823926
0.00000000 0.00000000 0.00000000 0.03720088 0.26651690 0.59319481 0.97840609 1.01487058 1.02151686 1.02572078 1.02897191
0.00000000 0.00000000 0.00000000 0.03729402 0.26665287 0.59292694 0.97947290 1.01602107 1.02260148 1.02673364 1.02992452
0.00000000 0.00000000 0.00000000 0.03738108 0.26678345 0.59266149 0.98071172 1.01734897 1.02386225 1.02792048 1.03104846
0.00000000 0.00000000 0.00000000 0.03748431 0.26693365 0.59242203 0.98187933 1.01862432 1.02509020 1.02909390 1.03217808
0.00000000 0.00000000 0.00000000 0.03758534 0.26708071 0.59218670 0.98293454 1.01978313 1.02620189 1.03015142 1.03319213
0.00000000 0.00000000 0.00000000 0.03768280 0.26722387 0.59195444 0.98384183 1.02078763 1.02715906 1.03105451 1.03405180
0.00000000 0.00000000 0.00000000 0.03777708 0.26736329 0.59172491 0.98460834 1.02164502 1.02796903 1.03181060 1.03476469
0.00000000 0.00000000 0.00000000 0.03786802 0.26749879 0.59149743 0.98523547 1.02235618 1.02863249 1.03242020 1.03533111
0.00000000 0.00000000 0.00000000 0.03795576 0.26763060 0.59127171 0.98572974 1.02292772 1.02915623 1.03289027 1.03575821
0.00000000 0.00000000 0.00000000 0.03804041 0.26775878 0.59104739 0.98609207 1.02336035 1.02954098 1.03322164 1.03604688
0.00000000 0.00000000 0.00000000 0.03812237 0.26788355 0.59082419 0.98632459 1.02365615 1.02978898 1.03341671 1.03619969
0.00000000 0.00000000 0.00000000 0.03820095 0.26800453 0.59060076 0.98608808 1.02346154 1.02954655 1.03312299 1.03586600
0.00000000 0.00000000 0.00000000 0.03827734 0.26812254 0.59037664 0.98555006 1.02295042 1.02898816 1.03251501 1.03522004
0.00000000 0.00000000 0.00000000 0.03835137 0.26823752 0.59015071 0.98466020 1.02206963 1.02806061 1.03153974 1.03420907
0.00000000 0.00000000 0.00000000 0.03842361 0.26835024 0.58992404 0.98434591 1.02178421 1.02772875 1.03115826 1.03378874
0.00000000 0.00000000 0.00000000 0.03849450 0.26846115 0.58969873 0.98452643 1.02201213 1.02791101 1.03128970 1.03387905
0.00000000 0.00000000 0.00000000 0.03857671 0.26858467 0.58948918 0.98479199 1.02234077 1.02820688 1.03154704 1.03410709
0.00000000 0.00000000 0.00000000 0.03865874 0.26870747 0.58928404 0.98578054 1.02342265 1.02925728 1.03255722 1.03508474
0.00000000 0.00000000 0.00000000 0.03873939 0.26882850 0.58908393 0.98705756 1.02480621 1.03061004 1.03386912 1.03636276
0.00000000 0.00000000 0.00000000 0.03881841 0.26894758 0.58888866 0.98808661 1.02593293 1.03170653 1.03492611 1.03738748
0.00000000 0.00000000 0.00000000 0.03889528 0.26906428 0.58869661 0.98862143 1.02654514 1.03228878 1.03547101 1.03790297
0.00000000 0.00000000 0.00000000 0.03896998 0.26917861 0.58850657 0.98889588 1.02688525 1.03259919 1.03574526 1.03814930
0.00000000 0.00000000 0.00000000 0.03904254 0.26929059 0.58831824 0.98926306 1.02732075 1.03300510 1.03611470 1.03849012
0.00000000 0.00000000 0.00000000 0.03911298 0.26940024 0.58813127 0.98933311 1.02744537 1.03310036 1.03617489 1.03852346
0.00000000 0.00000000 0.00000000 0.03918132 0.26950756 0.58794466 0.98907215 1.02722308 1.03284895 1.03589001 1.03821375
0.00000000 0.00000000 0.00000000 0.03924759 0.26961255 0.58775805 0.98892137 1.02711325 1.03271008 1.03571732 1.03801548
0.00000000 0.00000000 0.00000000 0.03931178 0.26971522 0.58757119 0.98852236 1.02674234 1.03231034 1.03528501 1.03755914
0.00000000 0.00000000 0.00000000 0.03937391 0.26981557 0.58738356 0.98804852 1.02629073 1.03183002 1.03477262 1.03702316
0.00000000 0.00000000 0.00000000 0.03943399 0.26991357 0.58719528 0.98772341 1.02599160 1.03150220 1.03441222 1.03663820
0.00000000 0.00000000 0.00000000 0.03949201 0.27000923 0.58700640 0.98730594 1.02559380 1.03107585 1.03395383 1.03615582
0.00000000 0.00000000 0.00000000 0.03954798 0.27010252 0.58681643 0.98667903 1.02497496 1.03042860 1.03327567 1.03545501
0.00000000 0.00000000 0.00000000 0.03960186 0.27019342 0.58662556 0.98639839 1.02471484 1.03014001 1.03295473 1.03510917
0.00000000 0.00000000 0.00000000 0.03965362 0.27028189 0.58643496 0.98652166 1.02487463 1.03027129 1.03305194 1.03517885
0.00000000 0.00000000 0.00000000 0.03970325 0.27036789 0.58624586 0.98706076 1.02546790 1.03083605 1.03358083 1.03567748
0.00000000 0.00000000 0.00000000 0.03975068 0.27045137 0.58605852 0.98737730 1.02582884 1.03116858 1.03387850 1.03594623
0.00000000 0.00000000 0.00000000 0.03979586 0.27053227 0.58587242 0.98764572 1.02613915 1.03145054 1.03412588 1.03616492
0.00000000 0.00000000 0.00000000 0.03983870 0.27061052 0.58568719 0.98776814 1.02629646 1.03157960 1.03422108 1.03623229
0.00000000 0.00000000 0.00000000 0.03987909 0.27068600 0.58550210 0.98763579 1.02618673 1.03144174 1.03405059 1.03603558
0.00000000 0.00000000 0.00000000 0.03991692 0.27075861 0.58531690 0.98765816 1.02623746 1.03146440 1.03404002 1.03599775
0.00000000 0.00000000 0.00000000 0.03995203 0.27082819 0.58513120 0.98735341 1.02594533 1.03114434 1.03368833 1.03562091
0.00000000 0.00000000 0.00000000 0.03998492 0.27089497 0.58494412 0.98672842 1.02531686 1.03048821 1.03300231 1.03491196
0.00000000 0.00000000 0.00000000 0.04001447 0.27095802 0.58475434 0.98602923 1.02460834 1.02975190 1.03223636 1.03412334
0.00000000 0.00000000 0.00000000 0.04004090 0.27101767 0.58456293 0.98585069 1.02444246 1.02955844 1.03201122 1.03387232
0.00000000 0.00000000 0.00000000 0.04010371 0.27109087 0.58437852 0.98613289 1.02475557 1.02984305 1.03226160 1.03409348
0.00000000 0.00000000 0.00000000 0.04021038 0.27118117 0.58420341 0.98635792 1.02500694 1.03006531 1.03244973 1.03425271
0.00000000 0.00000000 0.00000000 0.04033610 0.27127812 0.58403337 0.98644763 1.02511737 1.03014775 1.03249993 1.03427613
0.00000000 0.00000000 0.00000000 0.04049176 0.27138624 0.58386993 0.98660491 1.02529794 1.03030087 1.03262130 1.03437109
0.00000000 0.00000000 0.00000000 0.04068953 0.27151032 0.58371490 0.98693771 1.02566036 1.03063526 1.03292295 1.03464509
0.00000000 0.00000000 0.00000000 0.04094724 0.27165692 0.58357135 0.98722659 1.02597526 1.03092177 1.03317707 1.03487214
0.00000000 0.00000000 0.00000000 0.04128537 0.27183400 0.58344396 0.98732044 1.02608724 1.03100796 1.03323491 1.03490751
0.00000000 0.00009010 0.00000000 0.04171443 0.27204490 0.58333647 0.98729478 1.02608059 1.03098317 1.03319036 1.03484938
0.00000000 0.00087646 0.00000000 0.04223263 0.27229064 0.58325431 0.98731902 1.02614186 1.03104227 1.03324547 1.03490645
0.00000000 0.00141059 0.00000000 0.04282832 0.27257612 0.58320443 0.98754870 1.02644083 1.03136136 1.03358169 1.03526506
0.00000000 0.00168541 0.00000000 0.04346514 0.27288449 0.58317745 0.98745402 1.02641986 1.03137923 1.03363639 1.03536204
0.00000000 0.00238819 0.00000000 0.04412872 0.27320949 0.58316837 0.98715267 1.02619982 1.03121472 1.03352577 1.03531062
0.00000000 0.00346631 0.00110048 0.04487278 0.27356615 0.58318377 0.98683194 1.02597500 1.03106155 1.03344244 1.03530206
0.00000000 0.00459965 0.00277293 0.04574477 0.27398227 0.58324330 0.98641874 1.02567640 1.03085896 1.03333447 1.03529351
0.00000000 0.00588150 0.00472189 0.04677288 0.27447545 0.58335801 0.98567110 1.02505156 1.03035663 1.03295509 1.03504230
0.00000000 0.00743607 0.00696764 0.04796477 0.27505125 0.58353146 0.98463322 1.02414583 1.02959989 1.03234941 1.03459322
0.00000000 0.00913240 0.00949771 0.04930705 0.27570507 0.58376340 0.98323324 1.02288407 1.02851394 1.03144312 1.03387245
0.00000000 0.01017700 0.01207830 0.05078200 0.27643708 0.58405642 0.98175533 1.02156469 1.02739820 1.03053515 1.03317777
0.00000000 0.01062943 0.01458271 0.05236536 0.27724163 0.58440498 0.98006635 1.02004171 1.02610097 1.02946879 1.03234769
0.00000000 0.01079055 0.01696167 0.05401540 0.27809868 0.58479277 0.97812091 1.01825978 1.02455943 1.02817385 1.03130455
0.00000000 0.01042438 0.01908512 0.05568964 0.27898635 0.58520279 0.97603459 1.01633445 1.02288354 1.02675385 1.03014506
0.00000000 0.00939751 0.02078583 0.05732726 0.27987593 0.58561439 0.97388965 1.01434747 1.02114975 1.02527925 1.02893318
0.00000000 0.00825423 0.02205170 0.05886302 0.28072987 0.58599963 0.97164916 1.01225395 1.01930589 1.02369023 1.02760128
0.00000000 0.00746241 0.02302812 0.06026866 0.28152080 0.58633779 0.96941268 1.01015498 1.01744850 1.02207789 1.02623462
0.00000000 0.00686829 0.02378080 0.06157014 0.28225239 0.58662935 0.96726331 1.00813758 1.01566424 1.02052831 1.02491862
0.00000000 0.00672610 0.02446042 0.06277741 0.28290764 0.58685480 0.96531533 1.00631321 1.01405585 1.01913503 1.02373738
0.00000000 0.00698218 0.02521887 0.06396593 0.28353497 0.58705253 0.96370272 1.00483633 1.01279118 1.01807895 1.02288508
0.00000000 0.00763883 0.02616725 0.06518681 0.28415805 0.58723877 0.96243026 1.00371645 1.01188386 1.01737807 1.02238422
0.00000000 0.00863275 0.02738974 0.06648510 0.28479793 0.58742746 0.96133175 1.00278179 1.01116459 1.01686662 1.02207322
0.00000000 0.00982212 0.02894412 0.06788877 0.28546802 0.58762822 0.96003687 1.00164496 1.01024742 1.01616204 1.02157379
0.00000000 0.01090005 0.03070938 0.06940309 0.28617515 0.58784730 0.95845608 1.00021445 1.00904359 1.01517871 1.02080366
0.00000000 0.01228908 0.03272780 0.07102209 0.28691799 0.58808457 0.95652878 0.99842756 1.00749140 1.01385610 1.01970353
0.00000000 0.01324406 0.03481869 0.07268172 0.28767074 0.58832966 0.95417667 0.99620548 1.00551410 1.01211905 1.01819968
0.00000000 0.01309323 0.03665487 0.07432534 0.28841192 0.58857190 0.95169598 0.99386213 1.00342739 1.01028298 1.01660629
0.00000000 0.01231748 0.03816207 0.07594545 0.28913972 0.58880504 0.94915648 0.99146662 1.00129691 1.00840983 1.01498147
0.00000000 0.01166077 0.03931997 0.07748105 0.28982356 0.58900715 0.94658604 0.98904571 0.99914554 1.00651797 1.01333869
0.00000000 0.01130893 0.04025079 0.07887031 0.29042310 0.58915308 0.94378242 0.98638512 0.99675530 1.00438600 1.01145319
0.00000000 0.01063420 0.04084161 0.08656611 0.29095141 0.59053305 0.94077768 0.98351903 0.99416283 1.00205400 1.00937126
0.00000000 0.01000889 0.04113839 0.09298499 0.29667274 0.59166728 0.93780934 0.98068405 0.99160905 0.99976447 1.00732601
0.00000000 0.00920049 0.04122624 0.09797165 0.30176938 0.59254639 0.93508554 0.97810903 0.98931914 0.99773863 1.00553992
0.00000000 0.00907046 0.04127286 0.10104602 0.30620339 0.59309675 0.93255982 0.97574634 0.98724205 0.99592251 1.00395911
0.00000000 0.00947674 0.04161626 0.10167652 0.30991493 0.59310664 0.93017384 0.97353256 0.98531283 0.99425074 1.00251826
0.00000000 0.00974603 0.04208586 0.10232548 0.31277202 0.59299438 0.92794850 0.97149368 0.98355996 0.99275421 1.00125070
0.00000000 0.01015822 0.04254661 0.10291282 0.31430787 0.59283553 0.92540058 0.96912339 0.98147741 0.99092844 0.99965319
0.00000000 0.00977829 0.04268000 0.10336617 0.31422243 0.59261183 0.92272506 0.96663283 0.97927950 0.98898892 0.99794192
0.00000000 0.00952593 0.04268647 0.10786437 0.31403770 0.59231717 0.91989598 0.96399002 0.97693766 0.98690529 0.99608465
0.00000000 0.00884430 0.04246573 0.11046973 0.31377655 0.59480798 0.91731570 0.96161427 0.97487520 0.98509927 0.99450139
0.00000000 0.00833537 0.04206798 0.11044921 0.31342312 0.59711226 0.91478224 0.95929219 0.97286852 0.98334781 0.99296976
0.00000000 0.00825413 0.04144893 0.11017349 0.31295019 0.59916977 0.91203084 0.95674426 0.97063801 0.98137118 0.99120984
0.00000000 0.00778926 0.04060366 0.10966046 0.31231755 0.60171661 0.90941287 0.95435164 0.96856628 0.97955141 0.98960236
0.00000000 0.00708958 0.03947619 0.10894814 0.31154366 0.60406877 0.90686653 0.95204511 0.96658535 0.97782259 0.98808378
0.00000000 0.00718064 0.03859989 0.10823004 0.31071076 0.60634159 0.90475179 0.95019841 0.96506472 0.97655149 0.98701895
0.00000000 0.00888404 0.03843832 0.10757040 0.30983557 0.60843071 0.90258548 0.94829807 0.96349046 0.97522484 0.98589578
0.00000000 0.01029843 0.03904415 0.10700833 0.30892517 0.61038021 0.90052356 0.94651839 0.96204353 0.97402940 0.98490673
0.00000000 0.01032403 0.03985052 0.10660124 0.30802707 0.61220158 0.89849408 0.94478753 0.96065799 0.97290572 0.98399926
0.00000000 0.01094879 0.04082908 0.10631346 0.30713531 0.61383517 0.89622582 0.94281549 0.95904150 0.97155960 0.98287746
0.00000000 0.01120296 0.04198053 0.10616349 0.30625339 0.61532525 0.89391756 0.94080980 0.95739840 0.97019224 0.98173928
0.00000000 0.01157327 0.04321073 0.10615404 0.30538536 0.61664830 0.89144181 0.93863209 0.95558789 0.96866096 0.98044033
0.00000000 0.01219275 0.04461230 0.10621119 0.30449339 0.61778071 0.88875423 0.93623670 0.95356324 0.96691736 0.97893019
0.00000000 0.01274463 0.04599752 0.11061290 0.30355972 0.61875440 0.88605064 0.93384446 0.95154693 0.96518351 0.97742985
0.00000000 0.01317278 0.05237131 0.11352821 0.30261780 0.61957725 0.88329584 0.93140934 0.94949305 0.96341514 0.97589725
0.00000000 0.01346983 0.05668158 0.11399316 0.30675121 0.62025025 0.88045260 0.92889548 0.94736707 0.96157862 0.97429957
0.00000000 0.01380448 0.05879482 0.11392637 0.31029036 0.62099399 0.87757727 0.92636971 0.94523572 0.95974008 0.97270202
0.00000000 0.01373645 0.05836889 0.11381689 0.31316656 0.62155703 0.87450900 0.92365941 0.94292721 0.95772822 0.97093374
0.00000000 0.01180930 0.05680457 0.11913667 0.31525951 0.62192056 0.87120558 0.92075924 0.94045566 0.95557197 0.96903736
0.00000000 0.00929220 0.05822273 0.12464427 0.31764280 0.62202398 0.86781326 0.91780898 0.93794980 0.95338728 0.96711413
0.00000000 0.01027163 0.05722213 0.12872238 0.31925474 0.62190642 0.86439474 0.91486222 0.93545363 0.95121173 0.96519622
0.00000000 0.00995289 0.05437815 0.13175059 0.32021663 0.62209455 0.86114195 0.91209160 0.93312881 0.94920044 0.96343391
0.00000000 0.00949056 0.05139494 0.13384636 0.32050658 0.62216105 0.85792397 0.90934518 0.93081927 0.94719602 0.96166977
0.00000000 0.00948326 0.04926142 0.13740301 0.31981477 0.62201963 0.85451547 0.90640359 0.92831123 0.94498752 0.95969464
0.00000000 0.00944184 0.04734325 0.13977095 0.31752994 0.62208835 0.85106439 0.90345266 0.92579470 0.94276740 0.95770290
0.00000000 0.00955679 0.04600171 0.14105748 0.31485115 0.62194496 0.84742176 0.90031753 0.92309395 0.94036052 0.95552073
0.00000000 0.00927994 0.04466171 0.14099782 0.31206874 0.62164463 0.84380725 0.89724370 0.92045700 0.93801628 0.95339851
0.00000000 0.00886667 0.04364779 0.13939689 0.30925168 0.62128189 0.84053974 0.89452919 0.91817981 0.93603013 0.95163179
0.00000000 0.00874409 0.04265221 0.13564911 0.30632031 0.62076024 0.83732376 0.89187363 0.91596322 0.93410311 0.94992135
0.00000000 0.00854468 0.04159431 0.13186279 0.30326789 0.62007598 0.83413468 0.88925468 0.91378636 0.93221562 0.94824883
0.00000000 0.00839315 0.04073900 0.12816104 0.30013438 0.61928891 0.83118061 0.88687941 0.91185320 0.93056948 0.94681418
0.00000000 0.00872880 0.04032670 0.12468435 0.29698282 0.61841588 0.82842111 0.88470042 0.91011342 0.92911318 0.94556543
0.00000000 0.00931297 0.04064156 0.12160691 0.29389480 0.61749462 0.82588173 0.88273546 0.90858080 0.92785861 0.94451353
0.00000000 0.01002593 0.04156041 0.11895954 0.29089550 0.61654277 0.82358635 0.88101044 0.90728224 0.92683388 0.94368802
0.00000000 0.01095944 0.04289751 0.11669028 0.28796945 0.61550317 0.82128184 0.87926784 0.90596009 0.92578128 0.94283124
0.00000000 0.01177969 0.04450121 0.11474307 0.28510024 0.61434701 0.81884184 0.87738083 0.90448856 0.92457585 0.94181900
0.00000000 0.01219237 0.04587600 0.11292716 0.28221828 0.61304374 0.81622085 0.87531415 0.90283801 0.92319143 0.94062797
0.00000000 0.01238696 0.04699819 0.11113365 0.27928085 0.61161368 0.81358276 0.87324483 0.90119049 0.92181323 0.93944579
0.00000000 0.01158221 0.04730554 0.10916060 0.27620090 0.61002349 0.81092864 0.87118040 0.89955589 0.92045153 0.93828218
0.00000000 0.00949496 0.04607528 0.10673112 0.27286416 0.60822862 0.80825598 0.86912703 0.89794388 0.91911705 0.93714747
0.00000000 0.00862394 0.04397526 0.10395093 0.26932443 0.60625221 0.80558105 0.86709463 0.89636102 0.91781457 0.93604541
0.00000000 0.00934535 0.04272498 0.10131697 0.26578284 0.60414464 0.80276464 0.86491133 0.89462133 0.91635055 0.93477749
0.00000000 0.01101273 0.04257651 0.09914957 0.26237921 0.60218298 0.79996468 0.86272513 0.89286793 0.91486476 0.93348177
0.00000000 0.01071392 0.04293283 0.10287791 0.25909060 0.60018767 0.79728021 0.86064843 0.89121699 0.91347708 0.93228021
0.00000000 0.01096138 0.04342910 0.10546700 0.25583296 0.59811202 0.79464231 0.85861753 0.88960926 0.91213066 0.93111841
0.00000000 0.01106714 0.04400008 0.10692449 0.25266356 0.59598681 0.79202308 0.85660491 0.88801892 0.91080219 0.92997637
0.00000000 0.01121464 0.04470868 0.10700238 0.24962105 0.59381989 0.78933321 0.85451529 0.88634915 0.90939430 0.92875685
0.00000000 0.01062856 0.04502402 0.10981930 0.24656335 0.59151251 0.78631312 0.85209869 0.88435299 0.90766002 0.92721120
0.00000000 0.00961952 0.04435206 0.11122534 0.24887811 0.59006924 0.78348462 0.84989286 0.88256799 0.90613486 0.92587113
0.00000000 0.00945552 0.04404199 0.11162839 0.25081534 0.58867232 0.78099468 0.84800460 0.88108906 0.90490841 0.92482343
0.00000000 0.00972708 0.04396251 0.11030655 0.25228787 0.58721128 0.77840231 0.84598581 0.87946617 0.90352952 0.92361645
0.00000000 0.01009864 0.04422367 0.10769008 0.25321268 0.58562547 0.77555781 0.84369036 0.87755543 0.90185530 0.92210785
0.00000000 0.01009314 0.04437081 0.11554658 0.25362931 0.58403124 0.77287105 0.84154101 0.87578153 0.90031098 0.92072272
0.00000000 0.01061144 0.04489572 0.12248516 0.25355391 0.58244955 0.77036105 0.83954660 0.87415098 0.89890324 0.91946904
0.00000000 0.01055715 0.04546734 0.12841606 0.25281306 0.58082774 0.76788518 0.83756980 0.87252940 0.89749928 0.91821513
0.00000000 0.01077533 0.04591192 0.13346849 0.25117128 0.57921750 0.76558504 0.83575589 0.87106359 0.89624684 0.91710967
0.00000000 0.01093368 0.04622482 0.13746664 0.24802684 0.57751137 0.76316164 0.83381303 0.86946569 0.89486065 0.91586971
0.00000000 0.01125150 0.04617120 0.14037541 0.24470455 0.57599418 0.76070776 0.83184238 0.86783879 0.89344337 0.91459604
0.00000000 0.01165407 0.04643782 0.14257879 0.24492258 0.57462391 0.75825508 0.82985982 0.86619236 0.89200238 0.91329606
0.00000000 0.01215244 0.04690391 0.14424499 0.24459988 0.57337209 0.75596548 0.82802655 0.86468741 0.89069959 0.91213311
0.00000000 0.01112301 0.04759914 0.14562323 0.24368144 0.57224821 0.75399483 0.82648729 0.86346567 0.88967621 0.91124896
0.00000000 0.01153605 0.04840212 0.14655373 0.24148325 0.57115204 0.75206159 0.82495687 0.86223952 0.88864218 0.91035096
0.00000000 0.01199231 0.04917641 0.14685434 0.23877826 0.57007295 0.75027260 0.82355276 0.86113057 0.88772069 0.90956267
0.00000000 0.01246079 0.04997740 0.14647135 0.23618304 0.56896690 0.74846193 0.82210637 0.85996899 0.88674111 0.90871286
0.00000000 0.01264804 0.05091029 0.14532327 0.23369813 0.56780880 0.74650946 0.82049500 0.85863122 0.88557959 0.90767756
0.00000000 0.01258379 0.05441814 0.14328899 0.23421265 0.56667836 0.74463195 0.81893822 0.85733834 0.88445779 0.90667886
0.00000000 0.01235489 0.05534144 0.13972834 0.23407167 0.56565767 0.74288102 0.81747813 0.85612824 0.88341238 0.90575329
0.00000000 0.01164285 0.05491856 0.13617572 0.23259977 0.56471888 0.74137763 0.81624341 0.85513266 0.88257661 0.90503470
0.00000000 0.01123516 0.05451986 0.13302500 0.23058182 0.56384944 0.74014857 0.81526289 0.85438087 0.88197941 0.90455118
0.00000000 0.01170028 0.05448572 0.13030396 0.22869710 0.56300673 0.73901417 0.81434785 0.85367937 0.88142411 0.90410327
0.00000000 0.01203744 0.05446314 0.12779524 0.22686986 0.56211129 0.73775249 0.81328422 0.85281770 0.88070204 0.90348370
0.00000000 0.01252174 0.05468255 0.12540825 0.22503684 0.56114115 0.73637605 0.81208989 0.85181595 0.87983386 0.90271318
0.00000000 0.01204216 0.05448324 0.12308703 0.22316631 0.56005171 0.73475061 0.81063556 0.85054767 0.87869399 0.90166587
0.00000000 0.01208405 0.05370577 0.12061848 0.22122137 0.55905380 0.73292378 0.80898109 0.84907741 0.87734996 0.90041216
0.00000000 0.01208114 0.05327149 0.11836815 0.22423237 0.55872348 0.73089307 0.80710407 0.84737466 0.87576801 0.89891706
0.00000000 0.01319262 0.05252537 0.12250094 0.22953053 0.55861679 0.72903691 0.80538638 0.84582401 0.87433412 0.89756711
0.00000000 0.01267271 0.05176979 0.12568715 0.23444761 0.55857746 0.72739141 0.80386039 0.84445719 0.87308043 0.89639532
0.00000000 0.01197670 0.05108469 0.12799218 0.23901409 0.55862137 0.72598290 0.80254962 0.84329613 0.87202794 0.89542183
0.00000000 0.01166676 0.05061309 0.12940604 0.24325420 0.55878543 0.72493025 0.80157501 0.84246187 0.87129756 0.89476713
0.00000000 0.01114004 0.05051888 0.12990732 0.24719995 0.55907267 0.72419066 0.80088878 0.84190402 0.87083763 0.89437872
0.00000000 0.01066224 0.05050459 0.12884951 0.25078674 0.55943146 0.72365713 0.80038653 0.84151884 0.87054413 0.89415209
0.00000000 0.01048867 0.04997535 0.12596258 0.25381926 0.55973346 0.72311930 0.79987140 0.84111503 0.87022787 0.89389862
0.00000000 0.01034259 0.04870579 0.12280240 0.25616968 0.55989564 0.72244729 0.79922364 0.84057724 0.86977524 0.89350557
0.00000000 0.01042042 0.04760759 0.11972072 0.25800032 0.56001689 0.72175318 0.79854525 0.84000367 0.86928401 0.89307200
0.00000000 0.01020977 0.04682758 0.11684544 0.25936290 0.56011773 0.72100222 0.79779749 0.83935448 0.86871472 0.89255987
0.00000000 0.00997750 0.04623790 0.11426726 0.26029607 0.56024336 0.72027949 0.79705810 0.83870416 0.86814010 0.89204051
0.00000000 0.00985172 0.04591486 0.11203173 0.26079978 0.56041844 0.71961863 0.79635680 0.83808048 0.86758699 0.89154019
0.00000000 0.00914207 0.04518968 0.10984937 0.26068750 0.56064748 0.71918181 0.79587236 0.83766928 0.86724446 0.89124940
0.00000000 0.00926866 0.04422417 0.10762815 0.25971859 0.56085431 0.71879260 0.79542758 0.83729231 0.86693295 0.89098708
0.00000000 0.00910520 0.04321439 0.10537650 0.25726366 0.56105401 0.71850711 0.79508142 0.83700980 0.86671352 0.89081495
0.00000000 0.00927524 0.04252770 0.10330979 0.25446793 0.56127338 0.71828874 0.79478725 0.83677096 0.86653378 0.89068041
0.00000000 0.00925490 0.04224016 0.10154172 0.25185422 0.56154040 0.71814275 0.79454461 0.83657282 0.86638996 0.89057953
0.00000000 0.00939124 0.04200688 0.09991804 0.24935894 0.56182896 0.71805817 0.79434933 0.83641413 0.86628187 0.89051251
0.00000000 0.01015442 0.04214713 0.09844737 0.24698280 0.56208840 0.71786219 0.79402427 0.83611573 0.86602911 0.89029808
0.00000000 0.01025543 0.04251032 0.09712582 0.24472759 0.56227081 0.71737388 0.79338437 0.83549141 0.86544501 0.88974961
0.00000000 0.00952018 0.04249987 0.09596817 0.24261172 0.56245083 0.71680064 0.79264158 0.83475850 0.86474923 0.88908751
0.00000000 0.01096606 0.04229916 0.10130047 0.24063930 0.56260462 0.71606858 0.79172182 0.83383906 0.86386228 0.88823180
0.00000000 0.01017264 0.05051008 0.10539379 0.23872201 0.56289561 0.71548436 0.79094797 0.83306282 0.86311697 0.88751650
0.00000000 0.00894057 0.05541205 0.10822151 0.23680046 0.56318613 0.71503111 0.79030528 0.83241685 0.86250159 0.88693104
0.00000000 0.00784700 0.05822949 0.10984985 0.23491124 0.56349576 0.71472685 0.78980613 0.83191055 0.86202396 0.88648196
0.00000000 0.00749289 0.05982468 0.11024628 0.23310944 0.56388083 0.71468400 0.78955957 0.83165139 0.86179092 0.88627603
0.00000000 0.00754134 0.06064872 0.10864321 0.23142520 0.56435304 0.71489318 0.78955317 0.83162524 0.86178762 0.88629801
0.00000000 0.00798910 0.06108043 0.10642898 0.22990280 0.56486475 0.71511882 0.78954090 0.83158124 0.86176051 0.88629263
0.00000000 0.00789571 0.06074573 0.10434079 0.22844613 0.56530015 0.71507718 0.78924234 0.83124044 0.86143057 0.88598026
0.00000000 0.00746685 0.05967516 0.10224321 0.22699433 0.56562816 0.71473216 0.78862674 0.83057489 0.86077121 0.88533502
0.00000000 0.00738355 0.06058566 0.10028707 0.22907376 0.56599448 0.71416803 0.78777719 0.82966796 0.85986529 0.88443884
0.00000000 0.00963418 0.06035863 0.09830091 0.23048635 0.56641806 0.71382423 0.78714718 0.82897803 0.85917448 0.88375593
0.00000000 0.00928589 0.05956911 0.09641579 0.23109798 0.56690759 0.71368906 0.78671892 0.82848560 0.85867932 0.88326783
0.00000000 0.00887941 0.05856632 0.09477005 0.23032928 0.56751778 0.71387603 0.78660169 0.82829788 0.85848633 0.88308088
0.00000000 0.00836692 0.05689641 0.09315372 0.22900968 0.56805728 0.71383616 0.78624279 0.82786005 0.85803820 0.88263519
0.00000000 0.00753102 0.05456738 0.09144761 0.22766444 0.56840884 0.71325930 0.78533230 0.82686252 0.85702466 0.88161950
0.00000000 0.00594212 0.05823701 0.08967347 0.22631335 0.56891741 0.71239891 0.78413200 0.82557081 0.85571295 0.88030143
0.00000000 0.00929076 0.06020070 0.08776551 0.22494162 0.57016614 0.71198217 0.78338521 0.82473554 0.85485870 0.87944105
0.00000000 0.00892168 0.06131661 0.08592112 0.22361389 0.57159758 0.71213656 0.78321218 0.82447542 0.85458130 0.87915927
0.00000000 0.00864355 0.06182078 0.08422355 0.22238851 0.57316124 0.71265517 0.78339796 0.82457159 0.85465985 0.87923418
0.00000000 0.00815268 0.06207127 0.08279277 0.22131876 0.57484949 0.71345922 0.78385474 0.82493165 0.85499931 0.87956866
0.00000000 0.00752960 0.06171784 0.08143783 0.22032489 0.57654043 0.71429077 0.78432530 0.82529778 0.85534017 0.87990099
0.00000000 0.00743268 0.06084068 0.08006130 0.21934642 0.57813121 0.71492935 0.78458795 0.82544694 0.85545747 0.88000396
0.00000000 0.00726111 0.05969835 0.07870187 0.21838914 0.57970850 0.71561060 0.78488581 0.82562605 0.85560087 0.88012966
0.00000000 0.00659070 0.05804281 0.07734068 0.21745900 0.58112429 0.71588823 0.78476568 0.82537961 0.85531405 0.87982191
0.00000000 0.00499834 0.05576206 0.07602060 0.21659652 0.58245954 0.71594225 0.78440717 0.82488796 0.85477843 0.87926341
0.00000000 0.00280014 0.05297534 0.07471730 0.21578947 0.58393706 0.71643995 0.78449040 0.82483612 0.85468151 0.87914262
0.00000000 0.00232098 0.04967743 0.07338445 0.21500525 0.58558930 0.71752275 0.78516030 0.82536883 0.85516677 0.87960100
0.00000000 0.00194724 0.04573552 0.07204695 0.21423940 0.58728431 0.71880975 0.78602525 0.82608853 0.85583222 0.88023270
0.00000000 0.00251306 0.04065962 0.07069239 0.21347145 0.58890148 0.71997685 0.78675668 0.82666378 0.85634405 0.88070201
0.00000000 0.00222903 0.03519398 0.06941912 0.21275074 0.59052958 0.72121264 0.78754753 0.82729097 0.85690221 0.88121268
0.00000000 0.00185005 0.03049525 0.06810297 0.21204420 0.59216372 0.72253489 0.78842290 0.82799884 0.85753770 0.88179760
0.00000000 0.00265876 0.02693939 0.06681302 0.21136219 0.59377090 0.72384521 0.78927979 0.82868137 0.85814223 0.88234652
0.00000000 0.00247554 0.02445241 0.06577546 0.21080899 0.59555230 0.72561724 0.79059738 0.82982166 0.85920321 0.88335143
0.00000000 0.00193908 0.02229418 0.06488755 0.21037302 0.59729053 0.72718918 0.79170221 0.83074190 0.86004045 0.88413087
0.00000000 0.00240025 0.02049302 0.06397188 0.20995505 0.59889018 0.72840323 0.79243590 0.83128155 0.86048979 0.88451622
0.00000000 0.00212379 0.01876335 0.06301939 0.20954229 0.60032788 0.72919185 0.79272937 0.83137158 0.86048234 0.88443873
0.00000000 0.00208941 0.01730515 0.06207102 0.20915285 0.60171023 0.72987188 0.79290511 0.83133694 0.86034464 0.88422619
0.00000000 0.00186801 0.01605465 0.06112575 0.20878317 0.60303697 0.73044297 0.79296342 0.83117847 0.86007795 0.88388020
0.00000000 0.00198866 0.01510124 0.06013049 0.20840438 0.60428371 0.73086415 0.79286694 0.83086030 0.85964790 0.88336713
0.00000000 0.00148315 0.01413091 0.05925484 0.20810314 0.60601497 0.73192182 0.79341260 0.83118798 0.85986479 0.88350141
0.00000000 0.00094459 0.01320913 0.05849263 0.20788957 0.60792376 0.73349584 0.79447714 0.83203283 0.86059763 0.88415080
0.00000000 0.00068835 0.01215030 0.05765493 0.20767211 0.60965477 0.73462992 0.79508824 0.83241488 0.86085973 0.88432235
0.00000000 0.00091918 0.01113011 0.05671804 0.20741661 0.61123261 0.73544324 0.79536756 0.83245600 0.86077217 0.88413585
0.00000000 0.00025581 0.01007937 0.05580692 0.20718847 0.61291951 0.73664920 0.79604039 0.83288687 0.86107020 0.88433070
0.00000000 0.00012732 0.00908820 0.05486982 0.20696464 0.61485908 0.73872507 0.79759790 0.83420252 0.86225051 0.88540414
0.00000000 0.00000000 0.00810325 0.05393721 0.20675753 0.61698998 0.74146423 0.79982877 0.83618916 0.86409767 0.88713952
0.00000000 0.00000000 0.00714440 0.05301058 0.20656931 0.61910169 0.74421138 0.80206260 0.83816986 0.86593034 0.88885223
0.00000000 0.00000000 0.00622683 0.05202282 0.20635803 0.62111371 0.74676926 0.80410047 0.83994449 0.86754677 0.89033877
0.00000000 0.00000000 0.00541607 0.05099352 0.20612723 0.62302212 0.74911878 0.80592594 0.84149914 0.86893543 0.89159010
0.00000000 0.00000000 0.00470831 0.04996428 0.20590087 0.62477362 0.75105290 0.80733049 0.84262745 0.86989300 0.89240659
0.00000000 0.00000000 0.00407997 0.04896370 0.20569850 0.62637225 0.75255369 0.80829703 0.84331482 0.87040766 0.89277941
0.00000000 0.00000000 0.00357398 0.04804122 0.20554777 0.62803040 0.75427937 0.80949582 0.84423587 0.87115698 0.89338824
0.00000000 0.00000000 0.00311920 0.04721094 0.20546056 0.62980290 0.75639490 0.81109448 0.84555887 0.87230953 0.89440180
0.00000000 0.00000000 0.00258077 0.04639917 0.20540565 0.63160246 0.75865543 0.81284365 0.84703162 0.87361042 0.89556248
0.00000000 0.00000000 0.00197270 0.04555665 0.20535198 0.63351683 0.76140467 0.81509461 0.84900617 0.87541073 0.89721945
0.00000000 0.00000000 0.00138063 0.04469577 0.20530042 0.63545709 0.76434746 0.81754645 0.85117920 0.87740561 0.89906687
0.00000000 0.00000000 0.00092763 0.04388410 0.20527803 0.63740133 0.76737375 0.82008618 0.85343740 0.87948233 0.90099306
0.00000000 0.00000000 0.00055169 0.04311652 0.20528772 0.63933997 0.77044684 0.82267981 0.85574927 0.88161178 0.90297133
0.00000000 0.00000000 0.00018415 0.04236141 0.20531627 0.64121767 0.77339052 0.82515037 0.85793864 0.88361868 0.90482743
0.00000000 0.00000000 0.00000000 0.04162503 0.20536799 0.64299334 0.77605111 0.82734165 0.85984953 0.88534780 0.90640718
0.00000000 0.00000000 0.00000000 0.04094125 0.20545719 0.64466263 0.77839030 0.82921325 0.86144153 0.88675918 0.90767129
0.00000000 0.00000000 0.00000000 0.04031970 0.20559336 0.64622320 0.78037871 0.83073501 0.86268544 0.88782487 0.90859319
0.00000000 0.00000000 0.00000000 0.03972576 0.20575904 0.64773365 0.78226057 0.83215669 0.86383248 0.88879635 0.90942399
0.00000000 0.00000000 0.00000000 0.03918016 0.20596418 0.64928491 0.78435873 0.83380738 0.86521388 0.89000617 0.91049703
0.00000000 0.00000000 0.00000000 0.03865854 0.20619784 0.65079342 0.78638031 0.83538915 0.86653002 0.89115363 0.91151092
0.00000000 0.00000000 0.00000000 0.03818489 0.20646608 0.65231303 0.78852190 0.83710328 0.86798409 0.89244330 0.91267127
0.00000000 0.00000000 0.00000000 0.03777127 0.20678113 0.65383464 0.79072652 0.83889383 0.86952200 0.89382321 0.91392842
0.00000000 0.00000000 0.00000000 0.03741448 0.20714416 0.65536956 0.79303946 0.84080674 0.87118971 0.89533923 0.91532802
0.00000000 0.00000000 0.00000000 0.03710772 0.20755241 0.65689619 0.79538312 0.84276178 0.87290558 0.89690851 0.91678614
0.00000000 0.00000000 0.00000000 0.03684437 0.20800280 0.65834630 0.79748617 0.84448015 0.87438797 0.89824758 0.91801787
0.00000000 0.00000000 0.00000000 0.03661426 0.20848803 0.65974243 0.79945647 0.84607011 0.87574443 0.89946283 0.91912820
0.00000000 0.00000000 0.00000000 0.03641753 0.20900750 0.66118678 0.80172967 0.84797535 0.87742025 0.90099977 0.92056205
0.00000000 0.00000000 0.00000000 0.03623594 0.20955454 0.66262756 0.80410832 0.84999221 0.87920841 0.90264869 0.92210730
0.00000000 0.00000000 0.00000000 0.03604005 0.21010810 0.66404800 0.80657721 0.85210261 0.88108745 0.90438455 0.92373513
0.00000000 0.00000000 0.00000000 0.03583525 0.21065900 0.66546188 0.80922915 0.85440047 0.88315042 0.90629906 0.92553569
0.00000000 0.00000000 0.00000000 0.03563924 0.21121758 0.66673644 0.81144030 0.85625001 0.88475972 0.90775503 0.92687349
0.00000000 0.00000000 0.00000000 0.03545234 0.21178625 0.66786434 0.81316149 0.85760077 0.88586550 0.90870343 0.92770048
0.00000000 0.00000000 0.00000000 0.03527361 0.21236304 0.66900506 0.81515038 0.85922593 0.88724482 0.90992263 0.92879490
0.00000000 0.00000000 0.00000000 0.03510257 0.21295210 0.67006596 0.81695824 0.86066704 0.88843668 0.91095079 0.92969493
0.00000000 0.00000000 0.00000000 0.03491692 0.21353904 0.67104617 0.81862209 0.86195923 0.88947389 0.91181805 0.93042789
0.00000000 0.00000000 0.00000000 0.03471365 0.21411400 0.67196255 0.82025888 0.86322077 0.89047388 0.91264046 0.93110822
0.00000000 0.00000000 0.00000000 0.03450801 0.21468155 0.67282873 0.82193312 0.86451936 0.89150620 0.91348926 0.93180871
0.00000000 0.00000000 0.00000000 0.03431577 0.21525397 0.67376849 0.82428793 0.86651497 0.89323650 0.91503366 0.93320102
0.00000000 0.00000000 0.00000000 0.03413507 0.21583772 0.67462462 0.82647643 0.86834387 0.89479747 0.91640575 0.93441835
0.00000000 0.00000000 0.00000000 0.03394051 0.21641796 0.67545945 0.82891405 0.87042730 0.89660902 0.91802257 0.93587391
0.00000000 0.00000000 0.00000000 0.03372908 0.21698530 0.67622471 0.83138204 0.87254035 0.89844302 0.91965337 0.93733479
0.00000000 0.00000000 0.00000000 0.03350862 0.21754070 0.67683665 0.83338121 0.87417420 0.89978946 0.92078863 0.93829292
0.00000000 0.00000000 0.00000000 0.03328979 0.21808917 0.67732354 0.83505874 0.87548130 0.90080427 0.92158727 0.93891000
0.00000000 0.00000000 0.00000000 0.03308204 0.21863571 0.67766590 0.83625784 0.87630332 0.90133099 0.92189523 0.93903470
0.00000000 0.00000000 0.00000000 0.03290217 0.21919537 0.67786639 0.83691255 0.87657430 0.90130655 0.92165287 0.93861106
0.00000000 0.00000000 0.00000000 0.03273932 0.22359775 0.67808285 0.83814132 0.87743477 0.90187456 0.92200344 0.93878002
0.00000000 0.00000000 0.00000000 0.03258643 0.22696011 0.67834110 0.84026688 0.87921427 0.90336120 0.92326879 0.93985799
0.00000000 0.00000000 0.00000000 0.03242879 0.22832877 0.67847244 0.84215783 0.88075593 0.90460510 0.92428586 0.94068252
0.00000000 0.00000000 0.00000000 0.03227629 0.22880795 0.67851912 0.84427018 0.88252830 0.90607793 0.92552822 0.94172814
0.00000000 0.00000000 0.00000000 0.03213689 0.22928885 0.67838395 0.84574785 0.88366036 0.90691095 0.92613161 0.94213693
0.00000000 0.00000000 0.00000000 0.03202414 0.22978122 0.67812718 0.84718339 0.88475842 0.90771353 0.92670713 0.94252049
0.00000000 0.00000000 0.00000000 0.03192231 0.23028143 0.67767906 0.84791852 0.88514829 0.90780958 0.92657856 0.94220380
0.00000000 0.00000000 0.00000000 0.03182358 0.23078128 0.67782879 0.84867670 0.88556437 0.90793112 0.92647518 0.94191112
0.00000000 0.00000000 0.00000000 0.03172838 0.23128218 0.67791714 0.84972452 0.88627833 0.90835077 0.92666799 0.94191207
0.00000000 0.00000000 0.00000000 0.03163196 0.23178003 0.67796271 0.85139816 0.88763476 0.90941237 0.92749861 0.94254595
0.00000000 0.00000000 0.00000000 0.03153676 0.23227476 0.67791390 0.85344294 0.88937563 0.91085816 0.92871047 0.94355762
0.00000000 0.00000000 0.00000000 0.03144496 0.23276657 0.67770036 0.85535987 0.89099169 0.91217851 0.92979548 0.94444109
0.00000000 0.00000000 0.00000000 0.03135983 0.23325760 0.67730160 0.85718071 0.89251714 0.91340928 0.93079102 0.94523522
0.00000000 0.00000000 0.00000000 0.03128064 0.23374680 0.67667175 0.85890884 0.89395546 0.91455381 0.93170029 0.94594306
0.00000000 0.00000000 0.00000000 0.03120621 0.23423252 0.67566653 0.86113495 0.89591193 0.91621793 0.93312735 0.94716625
0.00000000 0.00000000 0.00000000 0.03113863 0.23471469 0.67427351 0.86304143 0.89755305 0.91756824 0.93424206 0.94807877
0.00000000 0.00000000 0.00000000 0.03107734 0.23519260 0.67289999 0.86484046 0.89909519 0.91882129 0.93526033 0.94889568
0.00000000 0.00000000 0.00000000 0.03102195 0.23566619 0.67154533 0.86657640 0.90058307 0.92002180 0.93622672 0.94966129
0.00000000 0.00000000 0.00000000 0.03097209 0.23613548 0.67020934 0.86838822 0.90215869 0.92131206 0.93728322 0.95051719
0.00000000 0.00000000 0.00000000 0.03092823 0.23660088 0.66889217 0.87010332 0.90364569 0.92251598 0.93825476 0.95128944
0.00000000 0.00000000 0.00000000 0.03089122 0.23706320 0.66759379 0.87160081 0.90492028 0.92351034 0.93901910 0.95185695
0.00000000 0.00000000 0.00000000 0.03086016 0.23752177 0.66631313 0.87314188 0.90624879 0.92456132 0.93984128 0.95248331
0.00000000 0.00000000 0.00000000 0.03083585 0.23797733 0.66505143 0.87514459 0.90805992 0.92609843 0.94114991 0.95359576
0.00000000 0.00000000 0.00000000 0.03081815 0.23842987 0.66380981 0.87752477 0.91026869 0.92803673 0.94286046 0.95511021
0.00000000 0.00000000 0.00000000 0.03080688 0.23887923 0.66258875 0.88003216 0.91261961 0.93012067 0.94471824 0.95677313
0.00000000 0.00000000 0.00000000 0.03080283 0.23932624 0.66138836 0.88221397 0.91464928 0.93188704 0.94626206 0.95812586
0.00000000 0.00000000 0.00000000 0.03080445 0.23976996 0.66020646 0.88404235 0.91632713 0.93330464 0.94746024 0.95913628
0.00000000 0.00000000 0.00000000 0.03081291 0.24021174 0.65904353 0.88587207 0.91801654 0.93473807 0.94867715 0.96016814
0.00000000 0.00000000 0.00000000 0.03082631 0.24065020 0.65789712 0.88723529 0.91923618 0.93570436 0.94943020 0.96073970
0.00000000 0.00000000 0.00000000 0.03084405 0.24108587 0.65676712 0.88872525 0.92059334 0.93681174 0.95032614 0.96145557
0.00000000 0.00000000 0.00000000 0.03086563 0.24151782 0.65565395 0.89083680 0.92259543 0.93856768 0.95187046 0.96281869
0.00000000 0.00000000 0.00000000 0.03089328 0.24194722 0.65455795 0.89198152 0.92361676 0.93934698 0.95244489 0.96321953
0.00000000 0.00000000 0.00000000 0.03092757 0.24237472 0.65347758 0.89304975 0.92456678 0.94005912 0.95295543 0.96355960
0.00000000 0.00000000 0.00000000 0.03097088 0.24280306 0.65241606 0.89471818 0.92614123 0.94140207 0.95409947 0.96453486
0.00000000 0.00000000 0.00000000 0.03100937 0.24362134 0.65012849 0.89725906 0.92886073 0.94386848 0.95631245 0.96652736
0.00000000 0.00000000 0.00000000 0.03104786 0.24443962 0.64784091 0.89979994 0.93158022 0.94633489 0.95852543 0.96851987
0.00000000 0.00000000 0.00000000 0.03108636 0.24525790 0.64555334 0.90234083 0.93429972 0.94880130 0.96073840 0.97051238
0.00000000 0.00000000 0.00000000 0.03112485 0.24607618 0.64326576 0.90488171 0.93701921 0.95126772 0.96295138 0.97250488
0.00000000 0.00000000 0.00000000 0.03116334 0.24689446 0.64097819 0.90742259 0.93973871 0.95373413 0.96516436 0.97449739
0.00000000 0.00000000 0.00000000 0.03120183 0.24771274 0.63869061 0.90996347 0.94245820 0.95620054 0.96737733 0.97648989
0.00000000 0.00000000 0.00000000 0.03124032 0.24853103 0.63640303 0.91250435 0.94517770 0.95866695 0.96959031 0.97848240
0.00000000 0.00000000 0.00000000 0.03127882 0.24934931 0.63411546 0.91504523 0.94789719 0.96113336 0.97180329 0.98047490
0.00000000 0.00000000 0.00000000 0.03131731 0.25016759 0.63182788 0.91758611 0.95061669 0.96359977 0.97401626 0.98246741
0.00000000 0.00000000 0.00000000 0.03135580 0.25098587 0.62954031 0.92012699 0.95333618 0.96606618 0.97622924 0.98445992
0.00000000 0.00000000 0.00000000 0.03139429 0.25180415 0.62725273 0.92266787 0.95605568 0.96853259 0.97844222 0.98645242
0.00000000 0.00000000 0.00000000 0.03143279 0.25262243 0.62496516 0.92520875 0.95877517 0.97099900 0.98065519 0.98844493
0.00000000 0.00000000 0.00000000 0.03147128 0.25344071 0.62267758 0.92774963 0.96149466 0.97346541 0.98286817 0.99043743
0.00000000 0.00000000 0.00000000 0.03150977 0.25425900 0.62039001 0.93029051 0.96421416 0.97593182 0.98508115 0.99242994
0.00000000 0.00000000 0.00000000 0.03154826 0.25507728 0.61810243 0.93283139 0.96693365 0.97839823 0.98729412 0.99442244
0.00000000 0.00000000 0.00000000 0.03158676 0.25589556 0.61581485 0.93537227 0.96965315 0.98086464 0.98950710 0.99641495
0.00000000 0.00000000 0.00000000 0.03162525 0.25671384 0.61352728 0.93791315 0.97237264 0.98333105 0.99172008 0.99840746
0.00000000 0.00000000 0.00000000 0.03166374 0.25753212 0.61123970 0.94045403 0.97509214 0.98579746 0.99393305 1.00039996
0.00000000 0.00000000 0.00000000 0.03170223 0.25835040 0.60895213 0.94299492 0.97781163 0.98826387 0.99614603 1.00239247
0.00000000 0.00000000 0.00000000 0.03174072 0.25916868 0.60666455 0.94553580 0.98053113 0.99073028 0.99835901 1.00438497
0.00000000 0.00000000 0.00000000 0.03195075 0.25943600 0.60621904 0.94717646 0.98219768 0.99225968 0.99976383 1.00568873
0.00000000 0.00000000 0.00000000 0.03215739 0.25969959 0.60578135 0.94840079 0.98344045 0.99336935 1.00075319 1.00658149
0.00000000 0.00000000 0.00000000 0.03235689 0.25995504 0.60534671 0.94968187 0.98474280 0.99453859 1.00180108 1.00753119
0.00000000 0.00000000 0.00000000 0.03255838 0.26021318 0.60492407 0.95027472 0.98534448 0.99501626 1.00216765 1.00781034
0.00000000 0.00000000 0.00000000 0.03275753 0.26046852 0.60450674 0.95065411 0.98572874 0.99528048 1.00232456 1.00788348
0.00000000 0.00000000 0.00000000 0.03295124 0.26071762 0.60409193 0.95152203 0.98661718 0.99604927 1.00298423 1.00845638
0.00000000 0.00000000 0.00000000 0.03313659 0.26095712 0.60367736 0.95246598 0.98758232 0.99689308 1.00371627 1.00909847
0.00000000 0.00000000 0.00000000 0.03331944 0.26119387 0.60326881 0.95302832 0.98815715 0.99735064 1.00406656 1.00936345
0.00000000 0.00000000 0.00000000 0.03350025 0.26142811 0.60286512 0.95321904 0.98835078 0.99743095 1.00404403 1.00926018
0.00000000 0.00000000 0.00000000 0.03367882 0.26165971 0.60246609 0.95373443 0.98888160 0.99785141 1.00436293 1.00949870
0.00000000 0.00000000 0.00000000 0.03385201 0.26188905 0.60207240 0.95427779 0.98944378 0.99830646 1.00471895 1.00977639
0.00000000 0.00000000 0.00000000 0.03402244 0.26211566 0.60168361 0.95469336 0.98987636 0.99863527 1.00495186 1.00993388
0.00000000 0.00000000 0.00000000 0.03418588 0.26233458 0.60129464 0.95503691 0.99023223 0.99888652 1.00510606 1.01001127
0.00000000 0.00000000 0.00000000 0.03434318 0.26254627 0.60090553 0.95523436 0.99043500 0.99898426 1.00510633 1.00993413
0.00000000 0.00000000 0.00000000 0.03449840 0.26275544 0.60051986 0.95508155 0.99027716 0.99872500 1.00475379 1.00950856
0.00000000 0.00000000 0.00000000 0.03465169 0.26296215 0.60013689 0.95482740 0.99001515 0.99836471 1.00430326 1.00898779
0.00000000 0.00000000 0.00000000 0.03480274 0.26316600 0.59975675 0.95502423 0.99021967 0.99847294 1.00432135 1.00893465
0.00000000 0.00000000 0.00000000 0.03494780 0.26336268 0.59937658 0.95551816 0.99072918 0.99888494 1.00464060 1.00917924
0.00000000 0.00000000 0.00000000 0.03508681 0.26355221 0.59899586 0.95539558 0.99059918 0.99865743 1.00432194 1.00878820
0.00000000 0.00000000 0.00000000 0.03522396 0.26373937 0.59861917 0.95602061 0.99124373 0.99920636 1.00477875 1.00917009
0.00000000 0.00000000 0.00000000 0.03535943 0.26392422 0.59824855 0.95720156 0.99246650 1.00033570 1.00581582 1.01013089
0.00000000 0.00000000 0.00000000 0.03549320 0.26410678 0.59788442 0.95814685 0.99344942 1.00122821 1.00661937 1.01086154
0.00000000 0.00000000 0.00000000 0.03562498 0.26428687 0.59752646 0.95921449 0.99456243 1.00225339 1.00755726 1.01172766
0.00000000 0.00000000 0.00000000 0.03575515 0.26446476 0.59717512 0.96040026 0.99580134 1.00340697 1.00862517 1.01272493
0.00000000 0.00000000 0.00000000 0.03588374 0.26464048 0.59683071 0.96170132 0.99716344 1.00468618 1.00982027 1.01385045
0.00000000 0.00000000 0.00000000 0.03601035 0.26481411 0.59649354 0.96311100 0.99864200 1.00608425 1.01113578 1.01509743
0.00000000 0.00000000 0.00000000 0.03613190 0.26498592 0.59616371 0.96445241 1.00005383 1.00741808 1.01238927 1.01628445
0.00000000 0.00000000 0.00000000 0.03624493 0.26514754 0.59583376 0.96607024 1.00174866 1.00903025 1.01391512 1.01773716
0.00000000 0.00000000 0.00000000 0.03635509 0.26530567 0.59551037 0.96768126 1.00343976 1.01064003 1.01543948 1.01918902
0.00000000 0.00000000 0.00000000 0.03646985 0.26546885 0.59520112 0.96906140 1.00490228 1.01202986 1.01675275 1.02043870
0.00000000 0.00000000 0.00000000 0.03658344 0.26563013 0.59489878 0.97036996 1.00629403 1.01335123 1.01799965 1.02162394
0.00000000 0.00000000 0.00000000 0.03669126 0.26578440 0.59459891 0.97196490 1.00798157 1.01496619 1.01953658 1.02309491
0.00000000 0.00000000 0.00000000 0.03679568 0.26593454 0.59430440 0.97346078 1.00956832 1.01648085 1.02097360 1.02446632
0.00000000 0.00000000 0.00000000 0.03689878 0.26608282 0.59401709 0.97492518 1.01112598 1.01796868 1.02238573 1.02581455
0.00000000 0.00000000 0.00000000 0.03700066 0.26622931 0.59373683 0.97636338 1.01265985 1.01943489 1.02377809 1.02714467
0.00000000 0.00000000 0.00000000 0.03710135 0.26637404 0.59346315 0.97756399 1.01395028 1.02065995 1.02493205 1.02823926
0.00000000 0.00000000 0.00000000 0.03720088 0.26651690 0.59319481 0.97840609 1.01487058 1.02151686 1.02572078 1.02897191
0.00000000 0.00000000 0.00000000 0.03729402 0.26665287 0.59292694 0.97947290 1.01602107 1.02260148 1.02673364 1.02992452
0.00000000 0.00000000 0.00000000 0.03738108 0.26678345 0.59266149 0.98071172 1.01734897 1.02386225 1.02792048 1.03104846
0.00000000 0.00000000 0.00000000 0.03748431 0.26693365 0.59242203 0.98187933 1.01862432 1.02509020 1.02909390 1.03217808
0.00000000 0.00000000 0.00000000 0.03758534 0.26708071 0.59218670 0.98293454 1.01978313 1.02620189 1.03015142 1.03319213
0.00000000 0.00000000 0.00000000 0.03768280 0.26722387 0.59195444 0.98384183 1.02078763 1.02715906 1.03105451 1.03405180
0.00000000 0.00000000 0.00000000 0.03777708 0.26736329 0.59172491 0.98460834 1.02164502 1.02796903 1.03181060 1.03476469
0.00000000 0.00000000 0.00000000 0.03786802 0.26749879 0.59149743 0.98523547 1.02235618 1.02863249 1.03242020 1.03533111
0.00000000 0.00000000 0.00000000 0.03795576 0.26763060 0.59127171 0.98572974 1.02292772 1.02915623 1.03289027 1.03575821
0.00000000 0.00000000 0.00000000 0.03804041 0.26775878 0.59104739 0.98609207 1.02336035 1.02954098 1.03322164 1.03604688
0.00000000 0.00000000 0.00000000 0.03812237 0.26788355 0.59082419 0.98632459 1.02365615 1.02978898 1.03341671 1.03619969
0.00000000 0.00000000 0.00000000 0.03820095 0.26800453 0.59060076 0.98608808 1.02346154 1.02954655 1.03312299 1.03586600
0.00000000 0.00000000 0.00000000 0.03827734 0.26812254 0.59037664 0.98555006 1.02295042 1.02898816 1.03251501 1.03522004
0.00000000 0.00000000 0.00000000 0.03835137 0.26823752 0.59015071 0.98466020 1.02206963 1.02806061 1.03153974 1.03420907
0.00000000 0.00000000 0.00000000 0.03842361 0.26835024 0.58992404 0.98434591 1.02178421 1.02772875 1.03115826 1.03378874
0.00000000 0.00000000 0.00000000 0.03849450 0.26846115 0.58969873 0.98452643 1.02201213 1.02791101 1.03128970 1.03387905
0.00000000 0.00000000 0.00000000 0.03857671 0.26858467 0.58948918 0.98479199 1.02234077 1.02820688 1.03154704 1.03410709
0.00000000 0.00000000 0.00000000 0.03865874 0.26870747 0.58928404 0.98578054 1.02342265 1.02925728 1.03255722 1.03508474
0.00000000 0.00000000 0.00000000 0.03873939 0.26882850 0.58908393 0.98705756 1.02480621 1.03061004 1.03386912 1.03636276
0.00000000 0.00000000 0.00000000 0.03881841 0.26894758 0.58888866 0.98808661 1.02593293 1.03170653 1.03492611 1.03738748
0.00000000 0.00000000 0.00000000 0.03889528 0.26906428 0.58869661 0.98862143 1.02654514 1.03228878 1.03547101 1.03790297
0.00000000 0.00000000 0.00000000 0.03896998 0.26917861 0.58850657 0.98889588 1.02688525 1.03259919 1.03574526 1.03814930
0.00000000 0.00000000 0.00000000 0.03904254 0.26929059 0.58831824 0.98926306 1.02732075 1.03300510 1.03611470 1.03849012
0.00000000 0.00000000 0.00000000 0.03911298 0.26940024 0.58813127 0.98933311 1.02744537 1.03310036 1.03617489 1.03852346
0.00000000 0.00000000 0.00000000 0.03918132 0.26950756 0.58794466 0.98907215 1.02722308 1.03284895 1.03589001 1.03821375
0.00000000 0.00000000 0.00000000 0.03924759 0.26961255 0.58775805 0.98892137 1.02711325 1.03271008 1.03571732 1.03801548
0.00000000 0.00000000 0.00000000 0.03931178 0.26971522 0.58757119 0.98852236 1.02674234 1.03231034 1.03528501 1.03755914
0.00000000 0.00000000 0.00000000 0.03937391 0.26981557 0.58738356 0.98804852 1.02629073 1.03183002 1.03477262 1.03702316
0.00000000 0.00000000 0.00000000 0.03943399 0.26991357 0.58719528 0.98772341 1.02599160 1.03150220 1.03441222 1.03663820
0.00000000 0.00000000 0.00000000 0.03949201 0.27000923 0.58700640 0.98730594 1.02559380 1.03107585 1.03395383 1.03615582
0.00000000 0.00000000 0.00000000 0.03954798 0.27010252 0.58681643 0.98667903 1.02497496 1.03042860 1.03327567 1.03545501
0.00000000 0.00000000 0.00000000 0.03960186 0.27019342 0.58662556 0.98639839 1.02471484 1.03014001 1.03295473 1.03510917
0.00000000 0.00000000 0.00000000 0.03965362 0.27028189 0.58643496 0.98652166 1.02487463 1.03027129 1.03305194 1.03517885
0.00000000 0.00000000 0.00000000 0.03970325 0.27036789 0.58624586 0.98706076 1.02546790 1.03083605 1.03358083 1.03567748
0.00000000 0.00000000 0.00000000 0.03975068 0.27045137 0.58605852 0.98737730 1.02582884 1.03116858 1.03387850 1.03594623
0.00000000 0.00000000 0.00000000 0.03979586 0.27053227 0.58587242 0.98764572 1.02613915 1.03145054 1.03412588 1.03616492
0.00000000 0.00000000 0.00000000 0.03983870 0.27061052 0.58568719 0.98776814 1.02629646 1.03157960 1.03422108 1.03623229
0.00000000 0.00000000 0.00000000 0.03987909 0.27068600 0.58550210 0.98763579 1.02618673 1.03144174 1.03405059 1.03603558
0.00000000 0.00000000 0.00000000 0.03991692 0.27075861 0.58531690 0.98765816 1.02623746 1.03146440 1.03404002 1.03599775
0.00000000 0.00000000 0.00000000 0.03995203 0.27082819 0.58513120 0.98735341 1.02594533 1.03114434 1.03368833 1.03562091
0.00000000 0.00000000 0.00000000 0.03998492 0.27089497 0.58494412 0.98672842 1.02531686 1.03048821 1.03300231 1.03491196
0.00000000 0.00000000 0.00000000 0.04001447 0.27095802 0.58475434 0.98602923 1.02460834 1.02975190 1.03223636 1.03412334
0.00000000 0.00000000 0.00000000 0.04004090 0.27101767 0.58456293 0.98585069 1.02444246 1.02955844 1.03201122 1.03387232
0.00000000 0.00000000 0.00000000 0.04010371 0.27109087 0.58437852 0.98613289 1.02475557 1.02984305 1.03226160 1.03409348
0.00000000 0.00000000 0.00000000 0.04021038 0.27118117 0.58420341 0.98635792 1.02500694 1.03006531 1.03244973 1.03425271
0.00000000 0.00000000 0.00000000 0.04033610 0.27127812 0.58403337 0.98644763 1.02511737 1.03014775 1.03249993 1.03427613
0.00000000 0.00000000 0.00000000 0.04049176 0.27138624 0.58386993 0.98660491 1.02529794 1.03030087 1.03262130 1.03437109
0.00000000 0.00000000 0.00000000 0.04068953 0.27151032 0.58371490 0.98693771 1.02566036 1.03063526 1.03292295 1.03464509
0.00000000 0.00000000 0.00000000 0.04094724 0.27165692 0.58357135 0.98722659 1.02597526 1.03092177 1.03317707 1.03487214
0.00000000 0.00000000 0.00000000 0.04128537 0.27183400 0.58344396 0.98732044 1.02608724 1.03100796 1.03323491 1.03490751
0.00000000 0.00009010 0.00000000 0.04171443 0.27204490 0.58333647 0.98729478 1.02608059 1.03098317 1.03319036 1.03484938
0.00000000 0.00087646 0.00000000 0.04223263 0.27229064 0.58325431 0.98731902 1.02614186 1.03104227 1.03324547 1.03490645
0.00000000 0.00141059 0.00000000 0.04282832 0.27257612 0.58320443 0.98754870 1.02644083 1.03136136 1.03358169 1.03526506
0.00000000 0.00168541 0.00000000 0.04346514 0.27288449 0.58317745 0.98745402 1.02641986 1.03137923 1.03363639 1.03536204
0.00000000 0.00238819 0.00000000 0.04412872 0.27320949 0.58316837 0.98715267 1.02619982 1.03121472 1.03352577 1.03531062
0.00000000 0.00346631 0.00110048 0.04487278 0.27356615 0.58318377 0.98683194 1.02597500 1.03106155 1.03344244 1.03530206
0.00000000 0.00459965 0.00277293 0.04574477 0.27398227 0.58324330 0.98641874 1.02567640 1.03085896 1.03333447 1.03529351
0.00000000 0.00588150 0.00472189 0.04677288 0.27447545 0.58335801 0.98567110 1.02505156 1.03035663 1.03295509 1.03504230
0.00000000 0.00743607 0.00696764 0.04796477 0.27505125 0.58353146 0.98463322 1.02414583 1.02959989 1.03234941 1.03459322
0.00000000 0.00913240 0.00949771 0.04930705 0.27570507 0.58376340 0.98323324 1.02288407 1.02851394 1.03144312 1.03387245
0.00000000 0.01017700 0.01207830 0.05078200 0.27643708 0.58405642 0.98175533 1.02156469 1.02739820 1.03053515 1.03317777
0.00000000 0.01062943 0.01458271 0.05236536 0.27724163 0.58440498 0.98006635 1.02004171 1.02610097 1.02946879 1.03234769
0.00000000 0.01079055 0.01696167 0.05401540 0.27809868 0.58479277 0.97812091 1.01825978 1.02455943 1.02817385 1.03130455
0.00000000 0.01042438 0.01908512 0.05568964 0.27898635 0.58520279 0.97603459 1.01633445 1.02288354 1.02675385 1.03014506
0.00000000 0.00939751 0.02078583 0.05732726 0.27987593 0.58561439 0.97388965 1.01434747 1.02114975 1.02527925 1.02893318
0.00000000 0.00825423 0.02205170 0.05886302 0.28072987 0.58599963 0.97164916 1.01225395 1.01930589 1.02369023 1.02760128
0.00000000 0.00746241 0.02302812 0.06026866 0.28152080 0.58633779 0.96941268 1.01015498 1.01744850 1.02207789 1.02623462
0.00000000 0.00686829 0.02378080 0.06157014 0.28225239 0.58662935 0.96726331 1.00813758 1.01566424 1.02052831 1.02491862
0.00000000 0.00672610 0.02446042 0.06277741 0.28290764 0.58685480 0.96531533 1.00631321 1.01405585 1.01913503 1.02373738
0.00000000 0.00698218 0.02521887 0.06396593 0.28353497 0.58705253 0.96370272 1.00483633 1.01279118 1.01807895 1.02288508
0.00000000 0.00763883 0.02616725 0.06518681 0.28415805 0.58723877 0.96243026 1.00371645 1.01188386 1.01737807 1.02238422
0.00000000 0.00863275 0.02738974 0.06648510 0.28479793 0.58742746 0.96133175 1.00278179 1.01116459 1.01686662 1.02207322
0.00000000 0.00982212 0.02894412 0.06788877 0.28546802 0.58762822 0.96003687 1.00164496 1.01024742 1.01616204 1.02157379
0.00000000 0.01090005 0.03070938 0.06940309 0.28617515 0.58784730 0.95845608 1.00021445 1.00904359 1.01517871 1.02080366
0.00000000 0.01228908 0.03272780 0.07102209 0.28691799 0.58808457 0.95652878 0.99842756 1.00749140 1.01385610 1.01970353
0.00000000 0.01324406 0.03481869 0.07268172 0.28767074 0.58832966 0.95417667 0.99620548 1.00551410 1.01211905 1.01819968
0.00000000 0.01309323 0.03665487 0.07432534 0.28841192 0.58857190 0.95169598 0.99386213 1.00342739 1.01028298 1.01660629
0.00000000 0.01231748 0.03816207 0.07594545 0.28913972 0.58880504 0.94915648 0.99146662 1.00129691 1.00840983 1.01498147
0.00000000 0.01166077 0.03931997 0.07748105 0.28982356 0.58900715 0.94658604 0.98904571 0.99914554 1.00651797 1.01333869
0.00000000 0.01130893 0.04025079 0.07887031 0.29042310 0.58915308 0.94378242 0.98638512 0.99675530 1.00438600 1.01145319
0.00000000 0.01063420 0.04084161 0.08656611 0.29095141 0.59053305 0.94077768 0.98351903 0.99416283 1.00205400 1.00937126
0.00000000 0.01000889 0.04113839 0.09298499 0.29667274 0.59166728 0.93780934 0.98068405 0.99160905 0.99976447 1.00732601
0.00000000 0.00920049 0.04122624 0.09797165 0.30176938 0.59254639 0.93508554 0.97810903 0.98931914 0.99773863 1.00553992
0.00000000 0.00907046 0.04127286 0.10104602 0.30620339 0.59309675 0.93255982 0.97574634 0.98724205 0.99592251 1.00395911
0.00000000 0.00947674 0.04161626 0.10167652 0.30991493 0.59310664 0.93017384 0.97353256 0.98531283 0.99425074 1.00251826
0.00000000 0.00974603 0.04208586 0.10232548 0.31277202 0.59299438 0.92794850 0.97149368 0.98355996 0.99275421 1.00125070
0.00000000 0.01015822 0.04254661 0.10291282 0.31430787 0.59283553 0.92540058 0.96912339 0.98147741 0.99092844 0.99965319
0.00000000 0.00977829 0.04268000 0.10336617 0.31422243 0.59261183 0.92272506 0.96663283 0.97927950 0.98898892 0.99794192
0.00000000 0.00952593 0.04268647 0.10786437 0.31403770 0.59231717 0.91989598 0.96399002 0.97693766 0.98690529 0.99608465
0.00000000 0.00884430 0.04246573 0.11046973 0.31377655 0.59480798 0.91731570 0.96161427 0.97487520 0.98509927 0.99450139
0.00000000 0.00833537 0.04206798 0.11044921 0.31342312 0.59711226 0.91478224 0.95929219 0.97286852 0.98334781 0.99296976
0.00000000 0.00825413 0.04144893 0.11017349 0.31295019 0.59916977 0.91203084 0.95674426 0.97063801 0.98137118 0.99120984
0.00000000 0.00778926 0.04060366 0.10966046 0.31231755 0.60171661 0.90941287 0.95435164 0.96856628 0.97955141 0.98960236
0.00000000 0.00708958 0.03947619 0.10894814 0.31154366 0.60406877 0.90686653 0.95204511 0.96658535 0.97782259 0.98808378
0.00000000 0.00718064 0.03859989 0.10823004 0.31071076 0.60634159 0.90475179 0.95019841 0.96506472 0.97655149 0.98701895
0.00000000 0.00888404 0.03843832 0.10757040 0.30983557 0.60843071 0.90258548 0.94829807 0.96349046 0.97522484 0.98589578
0.00000000 0.01029843 0.03904415 0.10700833 0.30892517 0.61038021 0.90052356 0.94651839 0.96204353 0.97402940 0.98490673
0.00000000 0.01032403 0.03985052 0.10660124 0.30802707 0.61220158 0.89849408 0.94478753 0.96065799 0.97290572 0.98399926
0.00000000 0.01094879 0.04082908 0.10631346 0.30713531 0.61383517 0.89622582 0.94281549 0.95904150 0.97155960 0.98287746
0.00000000 0.01120296 0.04198053 0.10616349 0.30625339 0.61532525 0.89391756 0.94080980 0.95739840 0.97019224 0.98173928
0.00000000 0.01157327 0.04321073 0.10615404 0.30538536 0.61664830 0.89144181 0.93863209 0.95558789 0.96866096 0.98044033
0.00000000 0.01219275 0.04461230 0.10621119 0.30449339 0.61778071 0.88875423 0.93623670 0.95356324 0.96691736 0.97893019
0.00000000 0.01274463 0.04599752 0.11061290 0.30355972 0.61875440 0.88605064 0.93384446 0.95154693 0.96518351 0.97742985
0.00000000 0.01317278 0.05237131 0.11352821 0.30261780 0.61957725 0.88329584 0.93140934 0.94949305 0.96341514 0.97589725
0.00000000 0.01346983 0.05668158 0.11399316 0.30675121 0.62025025 0.88045260 0.92889548 0.94736707 0.96157862 0.97429957
0.00000000 0.01380448 0.05879482 0.11392637 0.31029036 0.62099399 0.87757727 0.92636971 0.94523572 0.95974008 0.97270202
0.00000000 0.01373645 0.05836889 0.11381689 0.31316656 0.62155703 0.87450900 0.92365941 0.94292721 0.95772822 0.97093374
0.00000000 0.01180930 0.05680457 0.11913667 0.31525951 0.62192056 0.87120558 0.92075924 0.94045566 0.95557197 0.96903736
0.00000000 0.00929220 0.05822273 0.12464427 0.31764280 0.62202398 0.86781326 0.91780898 0.93794980 0.95338728 0.96711413
0.00000000 0.01027163 0.05722213 0.12872238 0.31925474 0.62190642 0.86439474 0.91486222 0.93545363 0.95121173 0.96519622
0.00000000 0.00995289 0.05437815 0.13175059 0.32021663 0.62209455 0.86114195 0.91209160 0.93312881 0.94920044 0.96343391
0.00000000 0.00949056 0.05139494 0.13384636 0.32050658 0.62216105 0.85792397 0.90934518 0.93081927 0.94719602 0.96166977
0.00000000 0.00948326 0.04926142 0.13740301 0.31981477 0.62201963 0.85451547 0.90640359 0.92831123 0.94498752 0.95969464
0.00000000 0.00944184 0.04734325 0.13977095 0.31752994 0.62208835 0.85106439 0.90345266 0.92579470 0.94276740 0.95770290
0.00000000 0.00955679 0.04600171 0.14105748 0.31485115 0.62194496 0.84742176 0.90031753 0.92309395 0.94036052 0.95552073
0.00000000 0.00927994 0.04466171 0.14099782 0.31206874 0.62164463 0.84380725 0.89724370 0.92045700 0.93801628 0.95339851
0.00000000 0.00886667 0.04364779 0.13939689 0.30925168 0.62128189 0.84053974 0.89452919 0.91817981 0.93603013 0.95163179
0.00000000 0.00874409 0.04265221 0.13564911 0.30632031 0.62076024 0.83732376 0.89187363 0.91596322 0.93410311 0.94992135
0.00000000 0.00854468 0.04159431 0.13186279 0.30326789 0.62007598 0.83413468 0.88925468 0.91378636 0.93221562 0.94824883
0.00000000 0.00839315 0.04073900 0.12816104 0.30013438 0.61928891 0.83118061 0.88687941 0.91185320 0.93056948 0.94681418
0.00000000 0.00872880 0.04032670 0.12468435 0.29698282 0.61841588 0.82842111 0.88470042 0.91011342 0.92911318 0.94556543
0.00000000 0.00931297 0.04064156 0.12160691 0.29389480 0.61749462 0.82588173 0.88273546 0.90858080 0.92785861 0.94451353
0.00000000 0.01002593 0.04156041 0.11895954 0.29089550 0.61654277 0.82358635 0.88101044 0.90728224 0.92683388 0.94368802
0.00000000 0.01095944 0.04289751 0.11669028 0.28796945 0.61550317 0.82128184 0.87926784 0.90596009 0.92578128 0.94283124
0.00000000 0.01177969 0.04450121 0.11474307 0.28510024 0.61434701 0.81884184 0.87738083 0.90448856 0.92457585 0.94181900
0.00000000 0.01219237 0.04587600 0.11292716 0.28221828 0.61304374 0.81622085 0.87531415 0.90283801 0.92319143 0.94062797
0.00000000 0.01238696 0.04699819 0.11113365 0.27928085 0.61161368 0.81358276 0.87324483 0.90119049 0.92181323 0.93944579
0.00000000 0.01158221 0.04730554 0.10916060 0.27620090 0.61002349 0.81092864 0.87118040 0.89955589 0.92045153 0.93828218
0.00000000 0.00949496 0.04607528 0.10673112 0.27286416 0.60822862 0.80825598 0.86912703 0.89794388 0.91911705 0.93714747
0.00000000 0.00862394 0.04397526 0.10395093 0.26932443 0.60625221 0.80558105 0.86709463 0.89636102 0.91781457 0.93604541
0.00000000 0.00934535 0.04272498 0.10131697 0.26578284 0.60414464 0.80276464 0.86491133 0.89462133 0.91635055 0.93477749
0.00000000 0.01101273 0.04257651 0.09914957 0.26237921 0.60218298 0.79996468 0.86272513 0.89286793 0.91486476 0.93348177
0.00000000 0.01071392 0.04293283 0.10287791 0.25909060 0.60018767 0.79728021 0.86064843 0.89121699 0.91347708 0.93228021
0.00000000 0.01096138 0.04342910 0.10546700 0.25583296 0.59811202 0.79464231 0.85861753 0.88960926 0.91213066 0.93111841
0.00000000 0.01106714 0.04400008 0.10692449 0.25266356 0.59598681 0.79202308 0.85660491 0.88801892 0.91080219 0.92997637
0.00000000 0.01121464 0.04470868 0.10700238 0.24962105 0.59381989 0.78933321 0.85451529 0.88634915 0.90939430 0.92875685
0.00000000 0.01062856 0.04502402 0.10981930 0.24656335 0.59151251 0.78631312 0.85209869 0.88435299 0.90766002 0.92721120
0.00000000 0.00961952 0.04435206 0.11122534 0.24887811 0.59006924 0.78348462 0.84989286 0.88256799 0.90613486 0.92587113
0.00000000 0.00945552 0.04404199 0.11162839 0.25081534 0.58867232 0.78099468 0.84800460 0.88108906 0.90490841 0.92482343
0.00000000 0.00972708 0.04396251 0.11030655 0.25228787 0.58721128 0.77840231 0.84598581 0.87946617 0.90352952 0.92361645
0.00000000 0.01009864 0.04422367 0.10769008 0.25321268 0.58562547 0.77555781 0.84369036 0.87755543 0.90185530 0.92210785
0.00000000 0.01009314 0.04437081 0.11554658 0.25362931 0.58403124 0.77287105 0.84154101 0.87578153 0.90031098 0.92072272
0.00000000 0.01061144 0.04489572 0.12248516 0.25355391 0.58244955 0.77036105 0.83954660 0.87415098 0.89890324 0.91946904
0.00000000 0.01055715 0.04546734 0.12841606 0.25281306 0.58082774 0.76788518 0.83756980 0.87252940 0.89749928 0.91821513
0.00000000 0.01077533 0.04591192 0.13346849 0.25117128 0.57921750 0.76558504 0.83575589 0.87106359 0.89624684 0.91710967
0.00000000 0.01093368 0.04622482 0.13746664 0.24802684 0.57751137 0.76316164 0.83381303 0.86946569 0.89486065 0.91586971
0.00000000 0.01125150 0.04617120 0.14037541 0.24470455 0.57599418 0.76070776 0.83184238 0.86783879 0.89344337 0.91459604
0.00000000 0.01165407 0.04643782 0.14257879 0.24492258 0.57462391 0.75825508 0.82985982 0.86619236 0.89200238 0.91329606
0.00000000 0.01215244 0.04690391 0.14424499 0.24459988 0.57337209 0.75596548 0.82802655 0.86468741 0.89069959 0.91213311
0.00000000 0.01112301 0.04759914 0.14562323 0.24368144 0.57224821 0.75399483 0.82648729 0.86346567 0.88967621 0.91124896
0.00000000 0.01153605 0.04840212 0.14655373 0.24148325 0.57115204 0.75206159 0.82495687 0.86223952 0.88864218 0.91035096
0.00000000 0.01199231 0.04917641 0.14685434 0.23877826 0.57007295 0.75027260 0.82355276 0.86113057 0.88772069 0.90956267
0.00000000 0.01246079 0.04997740 0.14647135 0.23618304 0.56896690 0.74846193 0.82210637 0.85996899 0.88674111 0.90871286
0.00000000 0.01264804 0.05091029 0.14532327 0.23369813 0.56780880 0.74650946 0.82049500 0.85863122 0.88557959 0.90767756
0.00000000 0.01258379 0.05441814 0.14328899 0.23421265 0.56667836 0.74463195 0.81893822 0.85733834 0.88445779 0.90667886
0.00000000 0.01235489 0.05534144 0.13972834 0.23407167 0.56565767 0.74288102 0.81747813 0.85612824 0.88341238 0.90575329
0.00000000 0.01164285 0.05491856 0.13617572 0.23259977 0.56471888 0.74137763 0.81624341 0.85513266 0.88257661 0.90503470
0.00000000 0.01123516 0.05451986 0.13302500 0.23058182 0.56384944 0.74014857 0.81526289 0.85438087 0.88197941 0.90455118
0.00000000 0.01170028 0.05448572 0.13030396 0.22869710 0.56300673 0.73901417 0.81434785 0.85367937 0.88142411 0.90410327
0.00000000 0.01203744 0.05446314 0.12779524 0.22686986 0.56211129 0.73775249 0.81328422 0.85281770 0.88070204 0.90348370
0.00000000 0.01252174 0.05468255 0.12540825 0.22503684 0.56114115 0.73637605 0.81208989 0.85181595 0.87983386 0.90271318
0.00000000 0.01204216 0.05448324 0.12308703 0.22316631 0.56005171 0.73475061 0.81063556 0.85054767 0.87869399 0.90166587
0.00000000 0.01208405 0.05370577 0.12061848 0.22122137 0.55905380 0.73292378 0.80898109 0.84907741 0.87734996 0.90041216
0.00000000 0.01208114 0.05327149 0.11836815 0.22423237 0.55872348 0.73089307 0.80710407 0.84737466 0.87576801 0.89891706
0.00000000 0.01319262 0.05252537 0.12250094 0.22953053 0.55861679 0.72903691 0.80538638 0.84582401 0.87433412 0.89756711
0.00000000 0.01267271 0.05176979 0.12568715 0.23444761 0.55857746 0.72739141 0.80386039 0.84445719 0.87308043 0.89639532
0.00000000 0.01197670 0.05108469 0.12799218 0.23901409 0.55862137 0.72598290 0.80254962 0.84329613 0.87202794 0.89542183
0.00000000 0.01166676 0.05061309 0.12940604 0.24325420 0.55878543 0.72493025 0.80157501 0.84246187 0.87129756 0.89476713
0.00000000 0.01114004 0.05051888 0.12990732 0.24719995 0.55907267 0.72419066 0.80088878 0.84190402 0.87083763 0.89437872
0.00000000 0.01066224 0.05050459 0.12884951 0.25078674 0.55943146 0.72365713 0.80038653 0.84151884 0.87054413 0.89415209
0.00000000 0.01048867 0.04997535 0.12596258 0.25381926 0.55973346 0.72311930 0.79987140 0.84111503 0.87022787 0.89389862
0.00000000 0.01034259 0.04870579 0.12280240 0.25616968 0.55989564 0.72244729 0.79922364 0.84057724 0.86977524 0.89350557
0.00000000 0.01042042 0.04760759 0.11972072 0.25800032 0.56001689 0.72175318 0.79854525 0.84000367 0.86928401 0.89307200
0.00000000 0.01020977 0.04682758 0.11684544 0.25936290 0.56011773 0.72100222 0.79779749 0.83935448 0.86871472 0.89255987
0.00000000 0.00997750 0.04623790 0.11426726 0.26029607 0.56024336 0.72027949 0.79705810 0.83870416 0.86814010 0.89204051
0.00000000 0.00985172 0.04591486 0.11203173 0.26079978 0.56041844 0.71961863 0.79635680 0.83808048 0.86758699 0.89154019
0.00000000 0.00914207 0.04518968 0.10984937 0.26068750 0.56064748 0.71918181 0.79587236 0.83766928 0.86724446 0.89124940
0.00000000 0.00926866 0.04422417 0.10762815 0.25971859 0.56085431 0.71879260 0.79542758 0.83729231 0.86693295 0.89098708
0.00000000 0.00910520 0.04321439 0.10537650 0.25726366 0.56105401 0.71850711 0.79508142 0.83700980 0.86671352 0.89081495
0.00000000 0.00927524 0.04252770 0.10330979 0.25446793 0.56127338 0.71828874 0.79478725 0.83677096 0.86653378 0.89068041
0.00000000 0.00925490 0.04224016 0.10154172 0.25185422 0.56154040 0.71814275 0.79454461 0.83657282 0.86638996 0.89057953
0.00000000 0.00939124 0.04200688 0.09991804 0.24935894 0.56182896 0.71805817 0.79434933 0.83641413 0.86628187 0.89051251
0.00000000 0.01015442 0.04214713 0.09844737 0.24698280 0.56208840 0.71786219 0.79402427 0.83611573 0.86602911 0.89029808
0.00000000 0.01025543 0.04251032 0.09712582 0.24472759 0.56227081 0.71737388 0.79338437 0.83549141 0.86544501 0.88974961
0.00000000 0.00952018 0.04249987 0.09596817 0.24261172 0.56245083 0.71680064 0.79264158 0.83475850 0.86474923 0.88908751
0.00000000 0.01096606 0.04229916 0.10130047 0.24063930 0.56260462 0.71606858 0.79172182 0.83383906 0.86386228 0.88823180
0.00000000 0.01017264 0.05051008 0.10539379 0.23872201 0.56289561 0.71548436 0.79094797 0.83306282 0.86311697 0.88751650
0.00000000 0.00894057 0.05541205 0.10822151 0.23680046 0.56318613 0.71503111 0.79030528 0.83241685 0.86250159 0.88693104
0.00000000 0.00784700 0.05822949 0.10984985 0.23491124 0.56349576 0.71472685 0.78980613 0.83191055 0.86202396 0.88648196
0.00000000 0.00749289 0.05982468 0.11024628 0.23310944 0.56388083 0.71468400 0.78955957 0.83165139 0.86179092 0.88627603
0.00000000 0.00754134 0.06064872 0.10864321 0.23142520 0.56435304 0.71489318 0.78955317 0.83162524 0.86178762 0.88629801
0.00000000 0.00798910 0.06108043 0.10642898 0.22990280 0.56486475 0.71511882 0.78954090 0.83158124 0.86176051 0.88629263
0.00000000 0.00789571 0.06074573 0.10434079 0.22844613 0.56530015 0.71507718 0.78924234 0.83124044 0.86143057 0.88598026
0.00000000 0.00746685 0.05967516 0.10224321 0.22699433 0.56562816 0.71473216 0.78862674 0.83057489 0.86077121 0.88533502
0.00000000 0.00738355 0.06058566 0.10028707 0.22907376 0.56599448 0.71416803 0.78777719 0.82966796 0.85986529 0.88443884
0.00000000 0.00963418 0.06035863 0.09830091 0.23048635 0.56641806 0.71382423 0.78714718 0.82897803 0.85917448 0.88375593
0.00000000 0.00928589 0.05956911 0.09641579 0.23109798 0.56690759 0.71368906 0.78671892 0.82848560 0.85867932 0.88326783
0.00000000 0.00887941 0.05856632 0.09477005 0.23032928 0.56751778 0.71387603 0.78660169 0.82829788 0.85848633 0.88308088
0.00000000 0.00836692 0.05689641 0.09315372 0.22900968 0.56805728 0.71383616 0.78624279 0.82786005 0.85803820 0.88263519
0.00000000 0.00753102 0.05456738 0.09144761 0.22766444 0.56840884 0.71325930 0.78533230 0.82686252 0.85702466 0.88161950
0.00000000 0.00594212 0.05823701 0.08967347 0.22631335 0.56891741 0.71239891 0.78413200 0.82557081 0.85571295 0.88030143
0.00000000 0.00929076 0.06020070 0.08776551 0.22494162 0.57016614 0.71198217 0.78338521 0.82473554 0.85485870 0.87944105
0.00000000 0.00892168 0.06131661 0.08592112 0.22361389 0.57159758 0.71213656 0.78321218 0.82447542 0.85458130 0.87915927
0.00000000 0.00864355 0.06182078 0.08422355 0.22238851 0.57316124 0.71265517 0.78339796 0.82457159 0.85465985 0.87923418
0.00000000 0.00815268 0.06207127 0.08279277 0.22131876 0.57484949 0.71345922 0.78385474 0.82493165 0.85499931 0.87956866
0.00000000 0.00752960 0.06171784 0.08143783 0.22032489 0.57654043 0.71429077 0.78432530 0.82529778 0.85534017 0.87990099
0.00000000 0.00743268 0.06084068 0.08006130 0.21934642 0.57813121 0.71492935 0.78458795 0.82544694 0.85545747 0.88000396
0.00000000 0.00726111 0.05969835 0.07870187 0.21838914 0.57970850 0.71561060 0.78488581 0.82562605 0.85560087 0.88012966
0.00000000 0.00659070 0.05804281 0.07734068 0.21745900 0.58112429 0.71588823 0.78476568 0.82537961 0.85531405 0.87982191
0.00000000 0.00499834 0.05576206 0.07602060 0.21659652 0.58245954 0.71594225 0.78440717 0.82488796 0.85477843 0.87926341
0.00000000 0.00280014 0.05297534 0.07471730 0.21578947 0.58393706 0.71643995 0.78449040 0.82483612 0.85468151 0.87914262
0.00000000 0.00232098 0.04967743 0.07338445 0.21500525 0.58558930 0.71752275 0.78516030 0.82536883 0.85516677 0.87960100
0.00000000 0.00194724 0.04573552 0.07204695 0.21423940 0.58728431 0.71880975 0.78602525 0.82608853 0.85583222 0.88023270
0.00000000 0.00251306 0.04065962 0.07069239 0.21347145 0.58890148 0.71997685 0.78675668 0.82666378 0.85634405 0.88070201
0.00000000 0.00222903 0.03519398 0.06941912 0.21275074 0.59052958 0.72121264 0.78754753 0.82729097 0.85690221 0.88121268
0.00000000 0.00185005 0.03049525 0.06810297 0.21204420 0.59216372 0.72253489 0.78842290 0.82799884 0.85753770 0.88179760
0.00000000 0.00265876 0.02693939 0.06681302 0.21136219 0.59377090 0.72384521 0.78927979 0.82868137 0.85814223 0.88234652
0.00000000 0.00247554 0.02445241 0.06577546 0.21080899 0.59555230 0.72561724 0.79059738 0.82982166 0.85920321 0.88335143
0.00000000 0.00193908 0.02229418 0.06488755 0.21037302 0.59729053 0.72718918 0.79170221 0.83074190 0.86004045 0.88413087
0.00000000 0.00240025 0.02049302 0.06397188 0.20995505 0.59889018 0.72840323 0.79243590 0.83128155 0.86048979 0.88451622
0.00000000 0.00212379 0.01876335 0.06301939 0.20954229 0.60032788 0.72919185 0.79272937 0.83137158 0.86048234 0.88443873
0.00000000 0.00208941 0.01730515 0.06207102 0.20915285 0.60171023 0.72987188 0.79290511 0.83133694 0.86034464 0.88422619
0.00000000 0.00186801 0.01605465 0.06112575 0.20878317 0.60303697 0.73044297 0.79296342 0.83117847 0.86007795 0.88388020
0.00000000 0.00198866 0.01510124 0.06013049 0.20840438 0.60428371 0.73086415 0.79286694 0.83086030 0.85964790 0.88336713
0.00000000 0.00148315 0.01413091 0.05925484 0.20810314 0.60601497 0.73192182 0.79341260 0.83118798 0.85986479 0.88350141
0.00000000 0.00094459 0.01320913 0.05849263 0.20788957 0.60792376 0.73349584 0.79447714 0.83203283 0.86059763 0.88415080
0.00000000 0.00068835 0.01215030 0.05765493 0.20767211 0.60965477 0.73462992 0.79508824 0.83241488 0.86085973 0.88432235
0.00000000 0.00091918 0.01113011 0.05671804 0.20741661 0.61123261 0.73544324 0.79536756 0.83245600 0.86077217 0.88413585
0.00000000 0.00025581 0.01007937 0.05580692 0.20718847 0.61291951 0.73664920 0.79604039 0.83288687 0.86107020 0.88433070
0.00000000 0.00012732 0.00908820 0.05486982 0.20696464 0.61485908 0.73872507 0.79759790 0.83420252 0.86225051 0.88540414
0.00000000 0.00000000 0.00810325 0.05393721 0.20675753 0.61698998 0.74146423 0.79982877 0.83618916 0.86409767 0.88713952
0.00000000 0.00000000 0.00714440 0.05301058 0.20656931 0.61910169 0.74421138 0.80206260 0.83816986 0.86593034 0.88885223
0.00000000 0.00000000 0.00622683 0.05202282 0.20635803 0.62111371 0.74676926 0.80410047 0.83994449 0.86754677 0.89033877
0.00000000 0.00000000 0.00541607 0.05099352 0.20612723 0.62302212 0.74911878 0.80592594 0.84149914 0.86893543 0.89159010
0.00000000 0.00000000 0.00470831 0.04996428 0.20590087 0.62477362 0.75105290 0.80733049 0.84262745 0.86989300 0.89240659
0.00000000 0.00000000 0.00407997 0.04896370 0.20569850 0.62637225 0.75255369 0.80829703 0.84331482 0.87040766 0.89277941
0.00000000 0.00000000 0.00357398 0.04804122 0.20554777 0.62803040 0.75427937 0.80949582 0.84423587 0.87115698 0.89338824
0.00000000 0.00000000 0.00311920 0.04721094 0.20546056 0.62980290 0.75639490 0.81109448 0.84555887 0.87230953 0.89440180
0.00000000 0.00000000 0.00258077 0.04639917 0.20540565 0.63160246 0.75865543 0.81284365 0.84703162 0.87361042 0.89556248
0.00000000 0.00000000 0.00197270 0.04555665 0.20535198 0.63351683 0.76140467 0.81509461 0.84900617 0.87541073 0.89721945
0.00000000 0.00000000 0.00138063 0.04469577 0.20530042 0.63545709 0.76434746 0.81754645 0.85117920 0.87740561 0.89906687
0.00000000 0.00000000 0.00092763 0.04388410 0.20527803 0.63740133 0.76737375 0.82008618 0.85343740 0.87948233 0.90099306
0.00000000 0.00000000 0.00055169 0.04311652 0.20528772 0.63933997 0.77044684 0.82267981 0.85574927 0.88161178 0.90297133
0.00000000 0.00000000 0.00018415 0.04236141 0.20531627 0.64121767 0.77339052 0.82515037 0.85793864 0.88361868 0.90482743
0.00000000 0.00000000 0.00000000 0.04162503 0.20536799 0.64299334 0.77605111 0.82734165 0.85984953 0.88534780 0.90640718
0.00000000 0.00000000 0.00000000 0.04094125 0.20545719 0.64466263 0.77839030 0.82921325 0.86144153 0.88675918 0.90767129
0.00000000 0.00000000 0.00000000 0.04031970 0.20559336 0.64622320 0.78037871 0.83073501 0.86268544 0.88782487 0.90859319
0.00000000 0.00000000 0.00000000 0.03972576 0.20575904 0.64773365 0.78226057 0.83215669 0.86383248 0.88879635 0.90942399
0.00000000 0.00000000 0.00000000 0.03918016 0.20596418 0.64928491 0.78435873 0.83380738 0.86521388 0.89000617 0.91049703
0.00000000 0.00000000 0.00000000 0.03865854 0.20619784 0.65079342 0.78638031 0.83538915 0.86653002 0.89115363 0.91151092
0.00000000 0.00000000 0.00000000 0.03818489 0.20646608 0.65231303 0.78852190 0.83710328 0.86798409 0.89244330 0.91267127
0.00000000 0.00000000 0.00000000 0.03777127 0.20678113 0.65383464 0.79072652 0.83889383 0.86952200 0.89382321 0.91392842
0.00000000 0.00000000 0.00000000 0.03741448 0.20714416 0.65536956 0.79303946 0.84080674 0.87118971 0.89533923 0.91532802
0.00000000 0.00000000 0.00000000 0.03710772 0.20755241 0.65689619 0.79538312 0.84276178 0.87290558 0.89690851 0.91678614
0.00000000 0.00000000 0.00000000 0.03684437 0.20800280 0.65834630 0.79748617 0.84448015 0.87438797 0.89824758 0.91801787
0.00000000 0.00000000 0.00000000 0.03661426 0.20848803 0.65974243 0.79945647 0.84607011 0.87574443 0.89946283 0.91912820
0.00000000 0.00000000 0.00000000 0.03641753 0.20900750 0.66118678 0.80172967 0.84797535 0.87742025 0.90099977 0.92056205
0.00000000 0.00000000 0.00000000 0.03623594 0.20955454 0.66262756 0.80410832 0.84999221 0.87920841 0.90264869 0.92210730
0.00000000 0.00000000 0.00000000 0.03604005 0.21010810 0.66404800 0.80657721 0.85210261 0.88108745 0.90438455 0.92373513
0.00000000 0.00000000 0.00000000 0.03583525 0.21065900 0.66546188 0.80922915 0.85440047 0.88315042 0.90629906 0.92553569
0.00000000 0.00000000 0.00000000 0.03563924 0.21121758 0.66673644 0.81144030 0.85625001 0.88475972 0.90775503 0.92687349
0.00000000 0.00000000 0.00000000 0.03545234 0.21178625 0.66786434 0.81316149 0.85760077 0.88586550 0.90870343 0.92770048
0.00000000 0.00000000 0.00000000 0.03527361 0.21236304 0.66900506 0.81515038 0.85922593 0.88724482 0.90992263 0.92879490
0.00000000 0.00000000 0.00000000 0.03510257 0.21295210 0.67006596 0.81695824 0.86066704 0.88843668 0.91095079 0.92969493
0.00000000 0.00000000 0.00000000 0.03491692 0.21353904 0.67104617 0.81862209 0.86195923 0.88947389 0.91181805 0.93042789
0.00000000 0.00000000 0.00000000 0.03471365 0.21411400 0.67196255 0.82025888 0.86322077 0.89047388 0.91264046 0.93110822
0.00000000 0.00000000 0.00000000 0.03450801 0.21468155 0.67282873 0.82193312 0.86451936 0.89150620 0.91348926 0.93180871
0.00000000 0.00000000 0.00000000 0.03431577 0.21525397 0.67376849 0.82428793 0.86651497 0.89323650 0.91503366 0.93320102
0.00000000 0.00000000 0.00000000 0.03413507 0.21583772 0.67462462 0.82647643 0.86834387 0.89479747 0.91640575 0.93441835
0.00000000 0.00000000 0.00000000 0.03394051 0.21641796 0.67545945 0.82891405 0.87042730 0.89660902 0.91802257 0.93587391
0.00000000 0.00000000 0.00000000 0.03372908 0.21698530 0.67622471 0.83138204 0.87254035 0.89844302 0.91965337 0.93733479
0.00000000 0.00000000 0.00000000 0.03350862 0.21754070 0.67683665 0.83338121 0.87417420 0.89978946 0.92078863 0.93829292
0.00000000 0.00000000 0.00000000 0.03328979 0.21808917 0.67732354 0.83505874 0.87548130 0.90080427 0.92158727 0.93891000
0.00000000 0.00000000 0.00000000 0.03308204 0.21863571 0.67766590 0.83625784 0.87630332 0.90133099 0.92189523 0.93903470
0.00000000 0.00000000 0.00000000 0.03290217 0.21919537 0.67786639 0.83691255 0.87657430 0.90130655 0.92165287 0.93861106
0.00000000 0.00000000 0.00000000 0.03273932 0.22359775 0.67808285 0.83814132 0.87743477 0.90187456 0.92200344 0.93878002
0.00000000 0.00000000 0.00000000 0.03258643 0.22696011 0.67834110 0.84026688 0.87921427 0.90336120 0.92326879 0.93985799
0.00000000 0.00000000 0.00000000 0.03242879 0.22832877 0.67847244 0.84215783 0.88075593 0.90460510 0.92428586 0.94068252
0.00000000 0.00000000 0.00000000 0.03227629 0.22880795 0.67851912 0.84427018 0.88252830 0.90607793 0.92552822 0.94172814
0.00000000 0.00000000 0.00000000 0.03213689 0.22928885 0.67838395 0.84574785 0.88366036 0.90691095 0.92613161 0.94213693
0.00000000 0.00000000 0.00000000 0.03202414 0.22978122 0.67812718 0.84718339 0.88475842 0.90771353 0.92670713 0.94252049
0.00000000 0.00000000 0.00000000 0.03192231 0.23028143 0.67767906 0.84791852 0.88514829 0.90780958 0.92657856 0.94220380
0.00000000 0.00000000 0.00000000 0.03182358 0.23078128 0.67782879 0.84867670 0.88556437 0.90793112 0.92647518 0.94191112
0.00000000 0.00000000 0.00000000 0.03172838 0.23128218 0.67791714 0.84972452 0.88627833 0.90835077 0.92666799 0.94191207
0.00000000 0.00000000 0.00000000 0.03163196 0.23178003 0.67796271 0.85139816 0.88763476 0.90941237 0.92749861 0.94254595
0.00000000 0.00000000 0.00000000 0.03153676 0.23227476 0.67791390 0.85344294 0.88937563 0.91085816 0.92871047 0.94355762
0.00000000 0.00000000 0.00000000 0.03144496 0.23276657 0.67770036 0.85535987 0.89099169 0.91217851 0.92979548 0.94444109
0.00000000 0.00000000 0.00000000 0.03135983 0.23325760 0.67730160 0.85718071 0.89251714 0.91340928 0.93079102 0.94523522
0.00000000 0.00000000 0.00000000 0.03128064 0.23374680 0.67667175 0.85890884 0.89395546 0.91455381 0.93170029 0.94594306
0.00000000 0.00000000 0.00000000 0.03120621 0.23423252 0.67566653 0.86113495 0.89591193 0.91621793 0.93312735 0.94716625
0.00000000 0.00000000 0.00000000 0.03113863 0.23471469 0.67427351 0.86304143 0.89755305 0.91756824 0.93424206 0.94807877
0.00000000 0.00000000 0.00000000 0.03107734 0.23519260 0.67289999 0.86484046 0.89909519 0.91882129 0.93526033 0.94889568
0.00000000 0.00000000 0.00000000 0.03102195 0.23566619 0.67154533 0.86657640 0.90058307 0.92002180 0.93622672 0.94966129
0.00000000 0.00000000 0.00000000 0.03097209 0.23613548 0.67020934 0.86838822 0.90215869 0.92131206 0.93728322 0.95051719
0.00000000 0.00000000 0.00000000 0.03092823 0.23660088 0.66889217 0.87010332 0.90364569 0.92251598 0.93825476 0.95128944
0.00000000 0.00000000 0.00000000 0.03089122 0.23706320 0.66759379 0.87160081 0.90492028 0.92351034 0.93901910 0.95185695
0.00000000 0.00000000 0.00000000 0.03086016 0.23752177 0.66631313 0.87314188 0.90624879 0.92456132 0.93984128 0.95248331
0.00000000 0.00000000 0.00000000 0.03083585 0.23797733 0.66505143 0.87514459 0.90805992 0.92609843 0.94114991 0.95359576
0.00000000 0.00000000 0.00000000 0.03081815 0.23842987 0.66380981 0.87752477 0.91026869 0.92803673 0.94286046 0.95511021
0.00000000 0.00000000 0.00000000 0.03080688 0.23887923 0.66258875 0.88003216 0.91261961 0.93012067 0.94471824 0.95677313
0.00000000 0.00000000 0.00000000 0.03080283 0.23932624 0.66138836 0.88221397 0.91464928 0.93188704 0.94626206 0.95812586
0.00000000 0.00000000 0.00000000 0.03080445 0.23976996 0.66020646 0.88404235 0.91632713 0.93330464 0.94746024 0.95913628
0.00000000 0.00000000 0.00000000 0.03081291 0.24021174 0.65904353 0.88587207 0.91801654 0.93473807 0.94867715 0.96016814
0.00000000 0.00000000 0.00000000 0.03082631 0.24065020 0.65789712 0.88723529 0.91923618 0.93570436 0.94943020 0.96073970
0.00000000 0.00000000 0.00000000 0.03084405 0.24108587 0.65676712 0.88872525 0.92059334 0.93681174 0.95032614 0.96145557
0.00000000 0.00000000 0.00000000 0.03086563 0.24151782 0.65565395 0.89083680 0.92259543 0.93856768 0.95187046 0.96281869
0.00000000 0.00000000 0.00000000 0.03089328 0.24194722 0.65455795 0.89198152 0.92361676 0.93934698 0.95244489 0.96321953
0.00000000 0.00000000 0.00000000 0.03092757 0.24237472 0.65347758 0.89304975 0.92456678 0.94005912 0.95295543 0.96355960
0.00000000 0.00000000 0.00000000 0.03097088 0.24280306 0.65241606 0.89471818 0.92614123 0.94140207 0.95409947 0.96453486
0.00000000 0.00000000 0.00000000 0.03100937 0.24362134 0.65012849 0.89725906 0.92886073 0.94386848 0.95631245 0.96652736
0.00000000 0.00000000 0.00000000 0.03104786 0.24443962 0.64784091 0.89979994 0.93158022 0.94633489 0.95852543 0.96851987
0.00000000 0.00000000 0.00000000 0.03108636 0.24525790 0.64555334 0.90234083 0.93429972 0.94880130 0.96073840 0.97051238
0.00000000 0.00000000 0.00000000 0.03112485 0.24607618 0.64326576 0.90488171 0.93701921 0.95126772 0.96295138 0.97250488
0.00000000 0.00000000 0.00000000 0.03116334 0.24689446 0.64097819 0.90742259 0.93973871 0.95373413 0.96516436 0.97449739
0.00000000 0.00000000 0.00000000 0.03120183 0.24771274 0.63869061 0.90996347 0.94245820 0.95620054 0.96737733 0.97648989
0.00000000 0.00000000 0.00000000 0.03124032 0.24853103 0.63640303 0.91250435 0.94517770 0.95866695 0.96959031 0.97848240
0.00000000 0.00000000 0.00000000 0.03127882 0.24934931 0.63411546 0.91504523 0.94789719 0.96113336 0.97180329 0.98047490
0.00000000 0.00000000 0.00000000 0.03131731 0.25016759 0.63182788 0.91758611 0.95061669 0.96359977 0.97401626 0.98246741
0.00000000 0.00000000 0.00000000 0.03135580 0.25098587 0.62954031 0.92012699 0.95333618 0.96606618 0.97622924 0.98445992
0.00000000 0.00000000 0.00000000 0.03139429 0.25180415 0.62725273 0.92266787 0.95605568 0.96853259 0.97844222 0.98645242
0.00000000 0.00000000 0.00000000 0.03143279 0.25262243 0.62496516 0.92520875 0.95877517 0.97099900 0.98065519 0.98844493
0.00000000 0.00000000 0.00000000 0.03147128 0.25344071 0.62267758 0.92774963 0.96149466 0.97346541 0.98286817 0.99043743
0.00000000 0.00000000 0.00000000 0.03150977 0.25425900 0.62039001 0.93029051 0.96421416 0.97593182 0.98508115 0.99242994
0.00000000 0.00000000 0.00000000 0.03154826 0.25507728 0.61810243 0.93283139 0.96693365 0.97839823 0.98729412 0.99442244
0.00000000 0.00000000 0.00000000 0.03158676 0.25589556 0.61581485 0.93537227 0.96965315 0.98086464 0.98950710 0.99641495
0.00000000 0.00000000 0.00000000 0.03162525 0.25671384 0.61352728 0.93791315 0.97237264 0.98333105 0.99172008 0.99840746
0.00000000 0.00000000 0.00000000 0.03166374 0.25753212 0.61123970 0.94045403 0.97509214 0.98579746 0.99393305 1.00039996
0.00000000 0.00000000 0.00000000 0.03170223 0.25835040 0.60895213 0.94299492 0.97781163 0.98826387 0.99614603 1.00239247
0.00000000 0.00000000 0.00000000 0.03174072 0.25916868 0.60666455 0.94553580 0.98053113 0.99073028 0.99835901 1.00438497
0.00000000 0.00000000 0.00000000 0.03195075 0.25943600 0.60621904 0.94717646 0.98219768 0.99225968 0.99976383 1.00568873
0.00000000 0.00000000 0.00000000 0.03215739 0.25969959 0.60578135 0.94840079 0.98344045 0.99336935 1.00075319 1.00658149
0.00000000 0.00000000 0.00000000 0.03235689 0.25995504 0.60534671 0.94968187 0.98474280 0.99453859 1.00180108 1.00753119
0.00000000 0.00000000 0.00000000 0.03255838 0.26021318 0.60492407 0.95027472 0.98534448 0.99501626 1.00216765 1.00781034
0.00000000 0.00000000 0.00000000 0.03275753 0.26046852 0.60450674 0.95065411 0.98572874 0.99528048 1.00232456 1.00788348
0.00000000 0.00000000 0.00000000 0.03295124 0.26071762 0.60409193 0.95152203 0.98661718 0.99604927 1.00298423 1.00845638
0.00000000 0.00000000 0.00000000 0.03313659 0.26095712 0.60367736 0.95246598 0.98758232 0.99689308 1.00371627 1.00909847
0.00000000 0.00000000 0.00000000 0.03331944 0.26119387 0.60326881 0.95302832 0.98815715 0.99735064 1.00406656 1.00936345
0.00000000 0.00000000 0.00000000 0.03350025 0.26142811 0.60286512 0.95321904 0.98835078 0.99743095 1.00404403 1.00926018
0.00000000 0.00000000 0.00000000 0.03367882 0.26165971 0.60246609 0.95373443 0.98888160 0.99785141 1.00436293 1.00949870
0.00000000 0.00000000 0.00000000 0.03385201 0.26188905 0.60207240 0.95427779 0.98944378 0.99830646 1.00471895 1.00977639
0.00000000 0.00000000 0.00000000 0.03402244 0.26211566 0.60168361 0.95469336 0.98987636 0.99863527 1.00495186 1.00993388
0.00000000 0.00000000 0.00000000 0.03418588 0.26233458 0.60129464 0.95503691 0.99023223 0.99888652 1.00510606 1.01001127
0.00000000 0.00000000 0.00000000 0.03434318 0.26254627 0.60090553 0.95523436 0.99043500 0.99898426 1.00510633 1.00993413
0.00000000 0.00000000 0.00000000 0.03449840 0.26275544 0.60051986 0.95508155 0.99027716 0.99872500 1.00475379 1.00950856
0.00000000 0.00000000 0.00000000 0.03465169 0.26296215 0.60013689 0.95482740 0.99001515 0.99836471 1.00430326 1.00898779
0.00000000 0.00000000 0.00000000 0.03480274 0.26316600 0.59975675 0.95502423 0.99021967 0.99847294 1.00432135 1.00893465
0.00000000 0.00000000 0.00000000 0.03494780 0.26336268 0.59937658 0.95551816 0.99072918 0.99888494 1.00464060 1.00917924
0.00000000 0.00000000 0.00000000 0.03508681 0.26355221 0.59899586 0.95539558 0.99059918 0.99865743 1.00432194 1.00878820
0.00000000 0.00000000 0.00000000 0.03522396 0.26373937 0.59861917 0.95602061 0.99124373 0.99920636 1.00477875 1.00917009
0.00000000 0.00000000 0.00000000 0.03535943 0.26392422 0.59824855 0.95720156 0.99246650 1.00033570 1.00581582 1.01013089
0.00000000 0.00000000 0.00000000 0.03549320 0.26410678 0.59788442 0.95814685 0.99344942 1.00122821 1.00661937 1.01086154
0.00000000 0.00000000 0.00000000 0.03562498 0.26428687 0.59752646 0.95921449 0.99456243 1.00225339 1.00755726 1.01172766
0.00000000 0.00000000 0.00000000 0.03575515 0.26446476 0.59717512 0.96040026 0.99580134 1.00340697 1.00862517 1.01272493
0.00000000 0.00000000 0.00000000 0.03588374 0.26464048 0.59683071 0.96170132 0.99716344 1.00468618 1.00982027 1.01385045
0.00000000 0.00000000 0.00000000 0.03601035 0.26481411 0.59649354 0.96311100 0.99864200 1.00608425 1.01113578 1.01509743
0.00000000 0.00000000 0.00000000 0.03613190 0.26498592 0.59616371 0.96445241 1.00005383 1.00741808 1.01238927 1.01628445
0.00000000 0.00000000 0.00000000 0.03624493 0.26514754 0.59583376 0.96607024 1.00174866 1.00903025 1.01391512 1.01773716
0.00000000 0.00000000 0.00000000 0.03635509 0.26530567 0.59551037 0.96768126 1.00343976 1.01064003 1.01543948 1.01918902
0.00000000 0.00000000 0.00000000 0.03646985 0.26546885 0.59520112 0.96906140 1.00490228 1.01202986 1.01675275 1.02043870
0.00000000 0.00000000 0.00000000 0.03658344 0.26563013 0.59489878 0.97036996 1.00629403 1.01335123 1.01799965 1.02162394
0.00000000 0.00000000 0.00000000 0.03669126 0.26578440 0.59459891 0.97196490 1.00798157 1.01496619 1.01953658 1.02309491
0.00000000 0.00000000 0.00000000 0.03679568 0.26593454 0.59430440 0.97346078 1.00956832 1.01648085 1.02097360 1.02446632
0.00000000 0.00000000 0.00000000 0.03689878 0.26608282 0.59401709 0.97492518 1.01112598 1.01796868 1.02238573 1.02581455
0.00000000 0.00000000 0.00000000 0.03700066 0.26622931 0.59373683 0.97636338 1.01265985 1.01943489 1.02377809 1.02714467
0.00000000 0.00000000 0.00000000 0.03710135 0.26637404 0.59346315 0.97756399 1.01395028 1.02065995 1.02493205 1.02823926
0.00000000 0.00000000 0.00000000 0.03720088 0.26651690 0.59319481 0.97840609 1.01487058 1.02151686 1.02572078 1.02897191
0.00000000 0.00000000 0.00000000 0.03729402 0.26665287 0.59292694 0.97947290 1.01602107 1.02260148 1.02673364 1.02992452
0.00000000 0.00000000 0.00000000 0.03738108 0.26678345 0.59266149 0.98071172 1.01734897 1.02386225 1.02792048 1.03104846
0.00000000 0.00000000 0.00000000 0.03748431 0.26693365 0.59242203 0.98187933 1.01862432 1.02509020 1.02909390 1.03217808
0.00000000 0.00000000 0.00000000 0.03758534 0.26708071 0.59218670 0.98293454 1.01978313 1.02620189 1.03015142 1.03319213
0.00000000 0.00000000 0.00000000 0.03768280 0.26722387 0.59195444 0.98384183 1.02078763 1.02715906 1.03105451 1.03405180
0.00000000 0.00000000 0.00000000 0.03777708 0.26736329 0.59172491 0.98460834 1.02164502 1.02796903 1.03181060 1.03476469
0.00000000 0.00000000 0.00000000 0.03786802 0.26749879 0.59149743 0.98523547 1.02235618 1.02863249 1.03242020 1.03533111
0.00000000 0.00000000 0.00000000 0.03795576 0.26763060 0.59127171 0.98572974 1.02292772 1.02915623 1.03289027 1.03575821
0.00000000 0.00000000 0.00000000 0.03804041 0.26775878 0.59104739 0.98609207 1.02336035 1.02954098 1.03322164 1.03604688
0.00000000 0.00000000 0.00000000 0.03812237 0.26788355 0.59082419 0.98632459 1.02365615 1.02978898 1.03341671 1.03619969
0.00000000 0.00000000 0.00000000 0.03820095 0.26800453 0.59060076 0.98608808 1.02346154 1.02954655 1.03312299 1.03586600
0.00000000 0.00000000 0.00000000 0.03827734 0.26812254 0.59037664 0.98555006 1.02295042 1.02898816 1.03251501 1.03522004
0.00000000 0.00000000 0.00000000 0.03835137 0.26823752 0.59015071 0.98466020 1.02206963 1.02806061 1.03153974 1.03420907
0.00000000 0.00000000 0.00000000 0.03842361 0.26835024 0.58992404 0.98434591 1.02178421 1.02772875 1.03115826 1.03378874
0.00000000 0.00000000 0.00000000 0.03849450 0.26846115 0.58969873 0.98452643 1.02201213 1.02791101 1.03128970 1.03387905
0.00000000 0.00000000 0.00000000 0.03857671 0.26858467 0.58948918 0.98479199 1.02234077 1.02820688 1.03154704 1.03410709
0.00000000 0.00000000 0.00000000 0.03865874 0.26870747 0.58928404 0.98578054 1.02342265 1.02925728 1.03255722 1.03508474
0.00000000 0.00000000 0.00000000 0.03873939 0.26882850 0.58908393 0.98705756 1.02480621 1.03061004 1.03386912 1.03636276
0.00000000 0.00000000 0.00000000 0.03881841 0.26894758 0.58888866 0.98808661 1.02593293 1.03170653 1.03492611 1.03738748
0.00000000 0.00000000 0.00000000 0.03889528 0.26906428 0.58869661 0.98862143 1.02654514 1.03228878 1.03547101 1.03790297
0.00000000 0.00000000 0.00000000 0.03896998 0.26917861 0.58850657 0.98889588 1.02688525 1.03259919 1.03574526 1.03814930
0.00000000 0.00000000 0.00000000 0.03904254 0.26929059 0.58831824 0.98926306 1.02732075 1.03300510 1.03611470 1.03849012
0.00000000 0.00000000 0.00000000 0.03911298 0.26940024 0.58813127 0.98933311 1.02744537 1.03310036 1.03617489 1.03852346
0.00000000 0.00000000 0.00000000 0.03918132 0.26950756 0.58794466 0.98907215 1.02722308 1.03284895 1.03589001 1.03821375
0.00000000 0.00000000 0.00000000 0.03924759 0.26961255 0.58775805 0.98892137 1.02711325 1.03271008 1.03571732 1.03801548
0.00000000 0.00000000 0.00000000 0.03931178 0.26971522 0.58757119 0.98852236 1.02674234 1.03231034 1.03528501 1.03755914
0.00000000 0.00000000 0.00000000 0.03937391 0.26981557 0.58738356 0.98804852 1.02629073 1.03183002 1.03477262 1.03702316
0.00000000 0.00000000 0.00000000 0.03943399 0.26991357 0.58719528 0.98772341 1.02599160 1.03150220 1.03441222 1.03663820
0.00000000 0.00000000 0.00000000 0.03949201 0.27000923 0.58700640 0.98730594 1.02559380 1.03107585 1.03395383 1.03615582
0.00000000 0.00000000 0.00000000 0.03954798 0.27010252 0.58681643 0.98667903 1.02497496 1.03042860 1.03327567 1.03545501
0.00000000 0.00000000 0.00000000 0.03960186 0.27019342 0.58662556 0.98639839 1.02471484 1.03014001 1.03295473 1.03510917
0.00000000 0.00000000 0.00000000 0.03965362 0.27028189 0.58643496 0.98652166 1.02487463 1.03027129 1.03305194 1.03517885
0.00000000 0.00000000 0.00000000 0.03970325 0.27036789 0.58624586 0.98706076 1.02546790 1.03083605 1.03358083 1.03567748
0.00000000 0.00000000 0.00000000 0.03975068 0.27045137 0.58605852 0.98737730 1.02582884 1.03116858 1.03387850 1.03594623
0.00000000 0.00000000 0.00000000 0.03979586 0.27053227 0.58587242 0.98764572 1.02613915 1.03145054 1.03412588 1.03616492
0.00000000 0.00000000 0.00000000 0.03983870 0.27061052 0.58568719 0.98776814 1.02629646 1.03157960 1.03422108 1.03623229
0.00000000 0.00000000 0.00000000 0.03987909 0.27068600 0.58550210 0.98763579 1.02618673 1.03144174 1.03405059 1.03603558
0.00000000 0.00000000 0.00000000 0.03991692 0.27075861 0.58531690 0.98765816 1.02623746 1.03146440 1.03404002 1.03599775
0.00000000 0.00000000 0.00000000 0.03995203 0.27082819 0.58513120 0.98735341 1.02594533 1.03114434 1.03368833 1.03562091
0.00000000 0.00000000 0.00000000 0.03998492 0.27089497 0.58494412 0.98672842 1.02531686 1.03048821 1.03300231 1.03491196
0.00000000 0.00000000 0.00000000 0.04001447 0.27095802 0.58475434 0.98602923 1.02460834 1.02975190 1.03223636 1.03412334
0.00000000 0.00000000 0.00000000 0.04004090 0.27101767 0.58456293 0.98585069 1.02444246 1.02955844 1.03201122 1.03387232
0.00000000 0.00000000 0.00000000 0.04010371 0.27109087 0.58437852 0.98613289 1.02475557 1.02984305 1.03226160 1.03409348
0.00000000 0.00000000 0.00000000 0.04021038 0.27118117 0.58420341 0.98635792 1.02500694 1.03006531 1.03244973 1.03425271
0.00000000 0.00000000 0.00000000 0.04033610 0.27127812 0.58403337 0.98644763 1.02511737 1.03014775 1.03249993 1.03427613
0.00000000 0.00000000 0.00000000 0.04049176 0.27138624 0.58386993 0.98660491 1.02529794 1.03030087 1.03262130 1.03437109
0.00000000 0.00000000 0.00000000 0.04068953 0.27151032 0.58371490 0.98693771 1.02566036 1.03063526 1.03292295 1.03464509
0.00000000 0.00000000 0.00000000 0.04094724 0.27165692 0.58357135 0.98722659 1.02597526 1.03092177 1.03317707 1.03487214
0.00000000 0.00000000 0.00000000 0.04128537 0.27183400 0.58344396 0.98732044 1.02608724 1.03100796 1.03323491 1.03490751
0.00000000 0.00009010 0.00000000 0.04171443 0.27204490 0.58333647 0.98729478 1.02608059 1.03098317 1.03319036 1.03484938
0.00000000 0.00087646 0.00000000 0.04223263 0.27229064 0.58325431 0.98731902 1.02614186 1.03104227 1.03324547 1.03490645
0.00000000 0.00141059 0.00000000 0.04282832 0.27257612 0.58320443 0.98754870 1.02644083 1.03136136 1.03358169 1.03526506
0.00000000 0.00168541 0.00000000 0.04346514 0.27288449 0.58317745 0.98745402 1.02641986 1.03137923 1.03363639 1.03536204
0.00000000 0.00238819 0.00000000 0.04412872 0.27320949 0.58316837 0.98715267 1.02619982 1.03121472 1.03352577 1.03531062
0.00000000 0.00346631 0.00110048 0.04487278 0.27356615 0.58318377 0.98683194 1.02597500 1.03106155 1.03344244 1.03530206
0.00000000 0.00459965 0.00277293 0.04574477 0.27398227 0.58324330 0.98641874 1.02567640 1.03085896 1.03333447 1.03529351
0.00000000 0.00588150 0.00472189 0.04677288 0.27447545 0.58335801 0.98567110 1.02505156 1.03035663 1.03295509 1.03504230
0.00000000 0.00743607 0.00696764 0.04796477 0.27505125 0.58353146 0.98463322 1.02414583 1.02959989 1.03234941 1.03459322
0.00000000 0.00913240 0.00949771 0.04930705 0.27570507 0.58376340 0.98323324 1.02288407 1.02851394 1.03144312 1.03387245
0.00000000 0.01017700 0.01207830 0.05078200 0.27643708 0.58405642 0.98175533 1.02156469 1.02739820 1.03053515 1.03317777
0.00000000 0.01062943 0.01458271 0.05236536 0.27724163 0.58440498 0.98006635 1.02004171 1.02610097 1.02946879 1.03234769
0.00000000 0.01079055 0.01696167 0.05401540 0.27809868 0.58479277 0.97812091 1.01825978 1.02455943 1.02817385 1.03130455
0.00000000 0.01042438 0.01908512 0.05568964 0.27898635 0.58520279 0.97603459 1.01633445 1.02288354 1.02675385 1.03014506
0.00000000 0.00939751 0.02078583 0.05732726 0.27987593 0.58561439 0.97388965 1.01434747 1.02114975 1.02527925 1.02893318
0.00000000 0.00825423 0.02205170 0.05886302 0.28072987 0.58599963 0.97164916 1.01225395 1.01930589 1.02369023 1.02760128
0.00000000 0.00746241 0.02302812 0.06026866 0.28152080 0.58633779 0.96941268 1.01015498 1.01744850 1.02207789 1.02623462
0.00000000 0.00686829 0.02378080 0.06157014 0.28225239 0.58662935 0.96726331 1.00813758 1.01566424 1.02052831 1.02491862
0.00000000 0.00672610 0.02446042 0.06277741 0.28290764 0.58685480 0.96531533 1.00631321 1.01405585 1.01913503 1.02373738
0.00000000 0.00698218 0.02521887 0.06396593 0.28353497 0.58705253 0.96370272 1.00483633 1.01279118 1.01807895 1.02288508
0.00000000 0.00763883 0.02616725 0.06518681 0.28415805 0.58723877 0.96243026 1.00371645 1.01188386 1.01737807 1.02238422
0.00000000 0.00863275 0.02738974 0.06648510 0.28479793 0.58742746 0.96133175 1.00278179 1.01116459 1.01686662 1.02207322
0.00000000 0.00982212 0.02894412 0.06788877 0.28546802 0.58762822 0.96003687 1.00164496 1.01024742 1.01616204 1.02157379
0.00000000 0.01090005 0.03070938 0.06940309 0.28617515 0.58784730 0.95845608 1.00021445 1.00904359 1.01517871 1.02080366
0.00000000 0.01228908 0.03272780 0.07102209 0.28691799 0.58808457 0.95652878 0.99842756 1.00749140 1.01385610 1.01970353
0.00000000 0.01324406 0.03481869 0.07268172 0.28767074 0.58832966 0.95417667 0.99620548 1.00551410 1.01211905 1.01819968
0.00000000 0.01309323 0.03665487 0.07432534 0.28841192 0.58857190 0.95169598 0.99386213 1.00342739 1.01028298 1.01660629
0.00000000 0.01231748 0.03816207 0.07594545 0.28913972 0.58880504 0.94915648 0.99146662 1.00129691 1.00840983 1.01498147
0.00000000 0.01166077 0.03931997 0.07748105 0.28982356 0.58900715 0.94658604 0.98904571 0.99914554 1.00651797 1.01333869
0.00000000 0.01130893 0.04025079 0.07887031 0.29042310 0.58915308 0.94378242 0.98638512 0.99675530 1.00438600 1.01145319
0.00000000 0.01063420 0.04084161 0.08656611 0.29095141 0.59053305 0.94077768 0.98351903 0.99416283 1.00205400 1.00937126
0.00000000 0.01000889 0.04113839 0.09298499 0.29667274 0.59166728 0.93780934 0.98068405 0.99160905 0.99976447 1.00732601
0.00000000 0.00920049 0.04122624 0.09797165 0.30176938 0.59254639 0.93508554 0.97810903 0.98931914 0.99773863 1.00553992
0.00000000 0.00907046 0.04127286 0.10104602 0.30620339 0.59309675 0.93255982 0.97574634 0.98724205 0.99592251 1.00395911
0.00000000 0.00947674 0.04161626 0.10167652 0.30991493 0.59310664 0.93017384 0.97353256 0.98531283 0.99425074 1.00251826
0.00000000 0.00974603 0.04208586 0.10232548 0.31277202 0.59299438 0.92794850 0.97149368 0.98355996 0.99275421 1.00125070
0.00000000 0.01015822 0.04254661 0.10291282 0.31430787 0.59283553 0.92540058 0.96912339 0.98147741 0.99092844 0.99965319
0.00000000 0.00977829 0.04268000 0.10336617 0.31422243 0.59261183 0.92272506 0.96663283 0.97927950 0.98898892 0.99794192
0.00000000 0.00952593 0.04268647 0.10786437 0.31403770 0.59231717 0.91989598 0.96399002 0.97693766 0.98690529 0.99608465
0.00000000 0.00884430 0.04246573 0.11046973 0.31377655 0.59480798 0.91731570 0.96161427 0.97487520 0.98509927 0.99450139
0.00000000 0.00833537 0.04206798 0.11044921 0.31342312 0.59711226 0.91478224 0.95929219 0.97286852 0.98334781 0.99296976
0.00000000 0.00825413 0.04144893 0.11017349 0.31295019 0.59916977 0.91203084 0.95674426 0.97063801 0.98137118 0.99120984
0.00000000 0.00778926 0.04060366 0.10966046 0.31231755 0.60171661 0.90941287 0.95435164 0.96856628 0.97955141 0.98960236
0.00000000 0.00708958 0.03947619 0.10894814 0.31154366 0.60406877 0.90686653 0.95204511 0.96658535 0.97782259 0.98808378
0.00000000 0.00718064 0.03859989 0.10823004 0.31071076 0.60634159 0.90475179 0.95019841 0.96506472 0.97655149 0.98701895
0.00000000 0.00888404 0.03843832 0.10757040 0.30983557 0.60843071 0.90258548 0.94829807 0.96349046 0.97522484 0.98589578
0.00000000 0.01029843 0.03904415 0.10700833 0.30892517 0.61038021 0.90052356 0.94651839 0.96204353 0.97402940 0.98490673
0.00000000 0.01032403 0.03985052 0.10660124 0.30802707 0.61220158 0.89849408 0.94478753 0.96065799 0.97290572 0.98399926
0.00000000 0.01094879 0.04082908 0.10631346 0.30713531 0.61383517 0.89622582 0.94281549 0.95904150 0.97155960 0.98287746
0.00000000 0.01120296 0.04198053 0.10616349 0.30625339 0.61532525 0.89391756 0.94080980 0.95739840 0.97019224 0.98173928
0.00000000 0.01157327 0.04321073 0.10615404 0.30538536 0.61664830 0.89144181 0.93863209 0.95558789 0.96866096 0.98044033
0.00000000 0.01219275 0.04461230 0.10621119 0.30449339 0.61778071 0.88875423 0.93623670 0.95356324 0.96691736 0.97893019
0.00000000 0.01274463 0.04599752 0.11061290 0.30355972 0.61875440 0.88605064 0.93384446 0.95154693 0.96518351 0.97742985
0.00000000 0.01317278 0.05237131 0.11352821 0.30261780 0.61957725 0.88329584 0.93140934 0.94949305 0.96341514 0.97589725
0.00000000 0.01346983 0.05668158 0.11399316 0.30675121 0.62025025 0.88045260 0.92889548 0.94736707 0.96157862 0.97429957
0.00000000 0.01380448 0.05879482 0.11392637 0.31029036 0.62099399 0.87757727 0.92636971 0.94523572 0.95974008 0.97270202
0.00000000 0.01373645 0.05836889 0.11381689 0.31316656 0.62155703 0.87450900 0.92365941 0.94292721 0.95772822 0.97093374
0.00000000 0.01180930 0.05680457 0.11913667 0.31525951 0.62192056 0.87120558 0.92075924 0.94045566 0.95557197 0.96903736
0.00000000 0.00929220 0.05822273 0.12464427 0.31764280 0.62202398 0.86781326 0.91780898 0.93794980 0.95338728 0.96711413
0.00000000 0.01027163 0.05722213 0.12872238 0.31925474 0.62190642 0.86439474 0.91486222 0.93545363 0.95121173 0.96519622
0.00000000 0.00995289 0.05437815 0.13175059 0.32021663 0.62209455 0.86114195 0.91209160 0.93312881 0.94920044 0.96343391
0.00000000 0.00949056 0.05139494 0.13384636 0.32050658 0.62216105 0.85792397 0.90934518 0.93081927 0.94719602 0.96166977
0.00000000 0.00948326 0.04926142 0.13740301 0.31981477 0.62201963 0.85451547 0.90640359 0.92831123 0.94498752 0.95969464
0.00000000 0.00944184 0.04734325 0.13977095 0.31752994 0.62208835 0.85106439 0.90345266 0.92579470 0.94276740 0.95770290
0.00000000 0.00955679 0.04600171 0.14105748 0.31485115 0.62194496 0.84742176 0.90031753 0.92309395 0.94036052 0.95552073
0.00000000 0.00927994 0.04466171 0.14099782 0.31206874 0.62164463 0.84380725 0.89724370 0.92045700 0.93801628 0.95339851
0.00000000 0.00886667 0.04364779 0.13939689 0.30925168 0.62128189 0.84053974 0.89452919 0.91817981 0.93603013 0.95163179
0.00000000 0.00874409 0.04265221 0.13564911 0.30632031 0.62076024 0.83732376 0.89187363 0.91596322 0.93410311 0.94992135
0.00000000 0.00854468 0.04159431 0.13186279 0.30326789 0.62007598 0.83413468 0.88925468 0.91378636 0.93221562 0.94824883
0.00000000 0.00839315 0.04073900 0.12816104 0.30013438 0.61928891 0.83118061 0.88687941 0.91185320 0.93056948 0.94681418
0.00000000 0.00872880 0.04032670 0.12468435 0.29698282 0.61841588 0.82842111 0.88470042 0.91011342 0.92911318 0.94556543
0.00000000 0.00931297 0.04064156 0.12160691 0.29389480 0.61749462 0.82588173 0.88273546 0.90858080 0.92785861 0.94451353
0.00000000 0.01002593 0.04156041 0.11895954 0.29089550 0.61654277 0.82358635 0.88101044 0.90728224 0.92683388 0.94368802
0.00000000 0.01095944 0.04289751 0.11669028 0.28796945 0.61550317 0.82128184 0.87926784 0.90596009 0.92578128 0.94283124
0.00000000 0.01177969 0.04450121 0.11474307 0.28510024 0.61434701 0.81884184 0.87738083 0.90448856 0.92457585 0.94181900
0.00000000 0.01219237 0.04587600 0.11292716 0.28221828 0.61304374 0.81622085 0.87531415 0.90283801 0.92319143 0.94062797
0.00000000 0.01238696 0.04699819 0.11113365 0.27928085 0.61161368 0.81358276 0.87324483 0.90119049 0.92181323 0.93944579
0.00000000 0.01158221 0.04730554 0.10916060 0.27620090 0.61002349 0.81092864 0.87118040 0.89955589 0.92045153 0.93828218
0.00000000 0.00949496 0.04607528 0.10673112 0.27286416 0.60822862 0.80825598 0.86912703 0.89794388 0.91911705 0.93714747
0.00000000 0.00862394 0.04397526 0.10395093 0.26932443 0.60625221 0.80558105 0.86709463 0.89636102 0.91781457 0.93604541
0.00000000 0.00934535 0.04272498 0.10131697 0.26578284 0.60414464 0.80276464 0.86491133 0.89462133 0.91635055 0.93477749
0.00000000 0.01101273 0.04257651 0.09914957 0.26237921 0.60218298 0.79996468 0.86272513 0.89286793 0.91486476 0.93348177
0.00000000 0.01071392 0.04293283 0.10287791 0.25909060 0.60018767 0.79728021 0.86064843 0.89121699 0.91347708 0.93228021
0.00000000 0.01096138 0.04342910 0.10546700 0.25583296 0.59811202 0.79464231 0.85861753 0.88960926 0.91213066 0.93111841
0.00000000 0.01106714 0.04400008 0.10692449 0.25266356 0.59598681 0.79202308 0.85660491 0.88801892 0.91080219 0.92997637
0.00000000 0.01121464 0.04470868 0.10700238 0.24962105 0.59381989 0.78933321 0.85451529 0.88634915 0.90939430 0.92875685
0.00000000 0.01062856 0.04502402 0.10981930 0.24656335 0.59151251 0.78631312 0.85209869 0.88435299 0.90766002 0.92721120
0.00000000 0.00961952 0.04435206 0.11122534 0.24887811 0.59006924 0.78348462 0.84989286 0.88256799 0.90613486 0.92587113
0.00000000 0.00945552 0.04404199 0.11162839 0.25081534 0.58867232 0.78099468 0.84800460 0.88108906 0.90490841 0.92482343
0.00000000 0.00972708 0.04396251 0.11030655 0.25228787 0.58721128 0.77840231 0.84598581 0.87946617 0.90352952 0.92361645
0.00000000 0.01009864 0.04422367 0.10769008 0.25321268 0.58562547 0.77555781 0.84369036 0.87755543 0.90185530 0.92210785
0.00000000 0.01009314 0.04437081 0.11554658 0.25362931 0.58403124 0.77287105 0.84154101 0.87578153 0.90031098 0.92072272
0.00000000 0.01061144 0.04489572 0.12248516 0.25355391 0.58244955 0.77036105 0.83954660 0.87415098 0.89890324 0.91946904
0.00000000 0.01055715 0.04546734 0.12841606 0.25281306 0.58082774 0.76788518 0.83756980 0.87252940 0.89749928 0.91821513
0.00000000 0.01077533 0.04591192 0.13346849 0.25117128 0.57921750 0.76558504 0.83575589 0.87106359 0.89624684 0.91710967
0.00000000 0.01093368 0.04622482 0.13746664 0.24802684 0.57751137 0.76316164 0.83381303 0.86946569 0.89486065 0.91586971
0.00000000 0.01125150 0.04617120 0.14037541 0.24470455 0.57599418 0.76070776 0.83184238 0.86783879 0.89344337 0.91459604
0.00000000 0.01165407 0.04643782 0.14257879 0.24492258 0.57462391 0.75825508 0.82985982 0.86619236 0.89200238 0.91329606
0.00000000 0.01215244 0.04690391 0.14424499 0.24459988 0.57337209 0.75596548 0.82802655 0.86468741 0.89069959 0.91213311
0.00000000 0.01112301 0.04759914 0.14562323 0.24368144 0.57224821 0.75399483 0.82648729 0.86346567 0.88967621 0.91124896
0.00000000 0.01153605 0.04840212 0.14655373 0.24148325 0.57115204 0.75206159 0.82495687 0.86223952 0.88864218 0.91035096
0.00000000 0.01199231 0.04917641 0.14685434 0.23877826 0.57007295 0.75027260 0.82355276 0.86113057 0.88772069 0.90956267
0.00000000 0.01246079 0.04997740 0.14647135 0.23618304 0.56896690 0.74846193 0.82210637 0.85996899 0.88674111 0.90871286
0.00000000 0.01264804 0.05091029 0.14532327 0.23369813 0.56780880 0.74650946 0.82049500 0.85863122 0.88557959 0.90767756
0.00000000 0.01258379 0.05441814 0.14328899 0.23421265 0.56667836 0.74463195 0.81893822 0.85733834 0.88445779 0.90667886
0.00000000 0.01235489 0.05534144 0.13972834 0.23407167 0.56565767 0.74288102 0.81747813 0.85612824 0.88341238 0.90575329
0.00000000 0.01164285 0.05491856 0.13617572 0.23259977 0.56471888 0.74137763 0.81624341 0.85513266 0.88257661 0.90503470
0.00000000 0.01123516 0.05451986 0.13302500 0.23058182 0.56384944 0.74014857 0.81526289 0.85438087 0.88197941 0.90455118
0.00000000 0.01170028 0.05448572 0.13030396 0.22869710 0.56300673 0.73901417 0.81434785 0.85367937 0.88142411 0.90410327
0.00000000 0.01203744 0.05446314 0.12779524 0.22686986 0.56211129 0.73775249 0.81328422 0.85281770 0.88070204 0.90348370
0.00000000 0.01252174 0.05468255 0.12540825 0.22503684 0.56114115 0.73637605 0.81208989 0.85181595 0.87983386 0.90271318
0.00000000 0.01204216 0.05448324 0.12308703 0.22316631 0.56005171 0.73475061 0.81063556 0.85054767 0.87869399 0.90166587
0.00000000 0.01208405 0.05370577 0.12061848 0.22122137 0.55905380 0.73292378 0.80898109 0.84907741 0.87734996 0.90041216
0.00000000 0.01208114 0.05327149 0.11836815 0.22423237 0.55872348 0.73089307 0.80710407 0.84737466 0.87576801 0.89891706
0.00000000 0.01319262 0.05252537 0.12250094 0.22953053 0.55861679 0.72903691 0.80538638 0.84582401 0.87433412 0.89756711
0.00000000 0.01267271 0.05176979 0.12568715 0.23444761 0.55857746 0.72739141 0.80386039 0.84445719 0.87308043 0.89639532
0.00000000 0.01197670 0.05108469 0.12799218 0.23901409 0.55862137 0.72598290 0.80254962 0.84329613 0.87202794 0.89542183
0.00000000 0.01166676 0.05061309 0.12940604 0.24325420 0.55878543 0.72493025 0.80157501 0.84246187 0.87129756 0.89476713
0.00000000 0.01114004 0.05051888 0.12990732 0.24719995 0.55907267 0.72419066 0.80088878 0.84190402 0.87083763 0.89437872
0.00000000 0.01066224 0.05050459 0.12884951 0.25078674 0.55943146 0.72365713 0.80038653 0.84151884 0.87054413 0.89415209
0.00000000 0.01048867 0.04997535 0.12596258 0.25381926 0.55973346 0.72311930 0.79987140 0.84111503 0.87022787 0.89389862
0.00000000 0.01034259 0.04870579 0.12280240 0.25616968 0.55989564 0.72244729 0.79922364 0.84057724 0.86977524 0.89350557
0.00000000 0.01042042 0.04760759 0.11972072 0.25800032 0.56001689 0.72175318 0.79854525 0.84000367 0.86928401 0.89307200
0.00000000 0.01020977 0.04682758 0.11684544 0.25936290 0.56011773 0.72100222 0.79779749 0.83935448 0.86871472 0.89255987
0.00000000 0.00997750 0.04623790 0.11426726 0.26029607 0.56024336 0.72027949 0.79705810 0.83870416 0.86814010 0.89204051
0.00000000 0.00985172 0.04591486 0.11203173 0.26079978 0.56041844 0.71961863 0.79635680 0.83808048 0.86758699 0.89154019
0.00000000 0.00914207 0.04518968 0.10984937 0.26068750 0.56064748 0.71918181 0.79587236 0.83766928 0.86724446 0.89124940
0.00000000 0.00926866 0.04422417 0.10762815 0.25971859 0.56085431 0.71879260 0.79542758 0.83729231 0.86693295 0.89098708
0.00000000 0.00910520 0.04321439 0.10537650 0.25726366 0.56105401 0.71850711 0.79508142 0.83700980 0.86671352 0.89081495
0.00000000 0.00927524 0.04252770 0.10330979 0.25446793 0.56127338 0.71828874 0.79478725 0.83677096 0.86653378 0.89068041
0.00000000 0.00925490 0.04224016 0.10154172 0.25185422 0.56154040 0.71814275 0.79454461 0.83657282 0.86638996 0.89057953
0.00000000 0.00939124 0.04200688 0.09991804 0.24935894 0.56182896 0.71805817 0.79434933 0.83641413 0.86628187 0.89051251
0.00000000 0.01015442 0.04214713 0.09844737 0.24698280 0.56208840 0.71786219 0.79402427 0.83611573 0.86602911 0.89029808
0.00000000 0.01025543 0.04251032 0.09712582 0.24472759 0.56227081 0.71737388 0.79338437 0.83549141 0.86544501 0.88974961
0.00000000 0.00952018 0.04249987 0.09596817 0.24261172 0.56245083 0.71680064 0.79264158 0.83475850 0.86474923 0.88908751
0.00000000 0.01096606 0.04229916 0.10130047 0.24063930 0.56260462 0.71606858 0.79172182 0.83383906 0.86386228 0.88823180
0.00000000 0.01017264 0.05051008 0.10539379 0.23872201 0.56289561 0.71548436 0.79094797 0.83306282 0.86311697 0.88751650
0.00000000 0.00894057 0.05541205 0.10822151 0.23680046 0.56318613 0.71503111 0.79030528 0.83241685 0.86250159 0.88693104
0.00000000 0.00784700 0.05822949 0.10984985 0.23491124 0.56349576 0.71472685 0.78980613 0.83191055 0.86202396 0.88648196
0.00000000 0.00749289 0.05982468 0.11024628 0.23310944 0.56388083 0.71468400 0.78955957 0.83165139 0.86179092 0.88627603
0.00000000 0.00754134 0.06064872 0.10864321 0.23142520 0.56435304 0.71489318 0.78955317 0.83162524 0.86178762 0.88629801
0.00000000 0.00798910 0.06108043 0.10642898 0.22990280 0.56486475 0.71511882 0.78954090 0.83158124 0.86176051 0.88629263
0.00000000 0.00789571 0.06074573 0.10434079 0.22844613 0.56530015 0.71507718 0.78924234 0.83124044 0.86143057 0.88598026
0.00000000 0.00746685 0.05967516 0.10224321 0.22699433 0.56562816 0.71473216 0.78862674 0.83057489 0.86077121 0.88533502
0.00000000 0.00738355 0.06058566 0.10028707 0.22907376 0.56599448 0.71416803 0.78777719 0.82966796 0.85986529 0.88443884
0.00000000 0.00963418 0.06035863 0.09830091 0.23048635 0.56641806 0.71382423 0.78714718 0.82897803 0.85917448 0.88375593
0.00000000 0.00928589 0.05956911 0.09641579 0.23109798 0.56690759 0.71368906 0.78671892 0.82848560 0.85867932 0.88326783
0.00000000 0.00887941 0.05856632 0.09477005 0.23032928 0.56751778 0.71387603 0.78660169 0.82829788 0.85848633 0.88308088
0.00000000 0.00836692 0.05689641 0.09315372 0.22900968 0.56805728 0.71383616 0.78624279 0.82786005 0.85803820 0.88263519
0.00000000 0.00753102 0.05456738 0.09144761 0.22766444 0.56840884 0.71325930 0.78533230 0.82686252 0.85702466 0.88161950
0.00000000 0.00594212 0.05823701 0.08967347 0.22631335 0.56891741 0.71239891 0.78413200 0.82557081 0.85571295 0.88030143
0.00000000 0.00929076 0.06020070 0.08776551 0.22494162 0.57016614 0.71198217 0.78338521 0.82473554 0.85485870 0.87944105
0.00000000 0.00892168 0.06131661 0.08592112 0.22361389 0.57159758 0.71213656 0.78321218 0.82447542 0.85458130 0.87915927
0.00000000 0.00864355 0.06182078 0.08422355 0.22238851 0.57316124 0.71265517 0.78339796 0.82457159 0.85465985 0.87923418
0.00000000 0.00815268 0.06207127 0.08279277 0.22131876 0.57484949 0.71345922 0.78385474 0.82493165 0.85499931 0.87956866
0.00000000 0.00752960 0.06171784 0.08143783 0.22032489 0.57654043 0.71429077 0.78432530 0.82529778 0.85534017 0.87990099
0.00000000 0.00743268 0.06084068 0.08006130 0.21934642 0.57813121 0.71492935 0.78458795 0.82544694 0.85545747 0.88000396
0.00000000 0.00726111 0.05969835 0.07870187 0.21838914 0.57970850 0.71561060 0.78488581 0.82562605 0.85560087 0.88012966
0.00000000 0.00659070 0.05804281 0.07734068 0.21745900 0.58112429 0.71588823 0.78476568 0.82537961 0.85531405 0.87982191
0.00000000 0.00499834 0.05576206 0.07602060 0.21659652 0.58245954 0.71594225 0.78440717 0.82488796 0.85477843 0.87926341
0.00000000 0.00280014 0.05297534 0.07471730 0.21578947 0.58393706 0.71643995 0.78449040 0.82483612 0.85468151 0.87914262
0.00000000 0.00232098 0.04967743 0.07338445 0.21500525 0.58558930 0.71752275 0.78516030 0.82536883 0.85516677 0.87960100
0.00000000 0.00194724 0.04573552 0.07204695 0.21423940 0.58728431 0.71880975 0.78602525 0.82608853 0.85583222 0.88023270
0.00000000 0.00251306 0.04065962 0.07069239 0.21347145 0.58890148 0.71997685 0.78675668 0.82666378 0.85634405 0.88070201
0.00000000 0.00222903 0.03519398 0.06941912 0.21275074 0.59052958 0.72121264 0.78754753 0.82729097 0.85690221 0.88121268
0.00000000 0.00185005 0.03049525 0.06810297 0.21204420 0.59216372 0.72253489 0.78842290 0.82799884 0.85753770 0.88179760
0.00000000 0.00265876 0.02693939 0.06681302 0.21136219 0.59377090 0.72384521 0.78927979 0.82868137 0.85814223 0.88234652
0.00000000 0.00247554 0.02445241 0.06577546 0.21080899 0.59555230 0.72561724 0.79059738 0.82982166 0.85920321 0.88335143
0.00000000 0.00193908 0.02229418 0.06488755 0.21037302 0.59729053 0.72718918 0.79170221 0.83074190 0.86004045 0.88413087
0.00000000 0.00240025 0.02049302 0.06397188 0.20995505 0.59889018 0.72840323 0.79243590 0.83128155 0.86048979 0.88451622
0.00000000 0.00212379 0.01876335 0.06301939 0.20954229 0.60032788 0.72919185 0.79272937 0.83137158 0.86048234 0.88443873
0.00000000 0.00208941 0.01730515 0.06207102 0.20915285 0.60171023 0.72987188 0.79290511 0.83133694 0.86034464 0.88422619
0.00000000 0.00186801 0.01605465 0.06112575 0.20878317 0.60303697 0.73044297 0.79296342 0.83117847 0.86007795 0.88388020
0.00000000 0.00198866 0.01510124 0.06013049 0.20840438 0.60428371 0.73086415 0.79286694 0.83086030 0.85964790 0.88336713
0.00000000 0.00148315 0.01413091 0.05925484 0.20810314 0.60601497 0.73192182 0.79341260 0.83118798 0.85986479 0.88350141
0.00000000 0.00094459 0.01320913 0.05849263 0.20788957 0.60792376 0.73349584 0.79447714 0.83203283 0.86059763 0.88415080
0.00000000 0.00068835 0.01215030 0.05765493 0.20767211 0.60965477 0.73462992 0.79508824 0.83241488 0.86085973 0.88432235
0.00000000 0.00091918 0.01113011 0.05671804 0.20741661 0.61123261 0.73544324 0.79536756 0.83245600 0.86077217 0.88413585
0.00000000 0.00025581 0.01007937 0.05580692 0.20718847 0.61291951 0.73664920 0.79604039 0.83288687 0.86107020 0.88433070
0.00000000 0.00012732 0.00908820 0.05486982 0.20696464 0.61485908 0.73872507 0.79759790 0.83420252 0.86225051 0.88540414
0.00000000 0.00000000 0.00810325 0.05393721 0.20675753 0.61698998 0.74146423 0.79982877 0.83618916 0.86409767 0.88713952
0.00000000 0.00000000 0.00714440 0.05301058 0.20656931 0.61910169 0.74421138 0.80206260 0.83816986 0.86593034 0.88885223
0.00000000 0.00000000 0.00622683 0.05202282 0.20635803 0.62111371 0.74676926 0.80410047 0.83994449 0.86754677 0.89033877
0.00000000 0.00000000 0.00541607 0.05099352 0.20612723 0.62302212 0.74911878 0.80592594 0.84149914 0.86893543 0.89159010
0.00000000 0.00000000 0.00470831 0.04996428 0.20590087 0.62477362 0.75105290 0.80733049 0.84262745 0.86989300 0.89240659
0.00000000 0.00000000 0.00407997 0.04896370 0.20569850 0.62637225 0.75255369 0.80829703 0.84331482 0.87040766 0.89277941
0.00000000 0.00000000 0.00357398 0.04804122 0.20554777 0.62803040 0.75427937 0.80949582 0.84423587 0.87115698 0.89338824
0.00000000 0.00000000 0.00311920 0.04721094 0.20546056 0.62980290 0.75639490 0.81109448 0.84555887 0.87230953 0.89440180
0.00000000 0.00000000 0.00258077 0.04639917 0.20540565 0.63160246 0.75865543 0.81284365 0.84703162 0.87361042 0.89556248
0.00000000 0.00000000 0.00197270 0.04555665 0.20535198 0.63351683 0.76140467 0.81509461 0.84900617 0.87541073 0.89721945
0.00000000 0.00000000 0.00138063 0.04469577 0.20530042 0.63545709 0.76434746 0.81754645 0.85117920 0.87740561 0.89906687
0.00000000 0.00000000 0.00092763 0.04388410 0.20527803 0.63740133 0.76737375 0.82008618 0.85343740 0.87948233 0.90099306
0.00000000 0.00000000 0.00055169 0.04311652 0.20528772 0.63933997 0.77044684 0.82267981 0.85574927 0.88161178 0.90297133
0.00000000 0.00000000 0.00018415 0.04236141 0.20531627 0.64121767 0.77339052 0.82515037 0.85793864 0.88361868 0.90482743
0.00000000 0.00000000 0.00000000 0.04162503 0.20536799 0.64299334 0.77605111 0.82734165 0.85984953 0.88534780 0.90640718
0.00000000 0.00000000 0.00000000 0.04094125 0.20545719 0.64466263 0.77839030 0.82921325 0.86144153 0.88675918 0.90767129
0.00000000 0.00000000 0.00000000 0.04031970 0.20559336 0.64622320 0.78037871 0.83073501 0.86268544 0.88782487 0.90859319
0.00000000 0.00000000 0.00000000 0.03972576 0.20575904 0.64773365 0.78226057 0.83215669 0.86383248 0.88879635 0.90942399
0.00000000 0.00000000 0.00000000 0.03918016 0.20596418 0.64928491 0.78435873 0.83380738 0.86521388 0.89000617 0.91049703
0.00000000 0.00000000 0.00000000 0.03865854 0.20619784 0.65079342 0.78638031 0.83538915 0.86653002 0.89115363 0.91151092
0.00000000 0.00000000 0.00000000 0.03818489 0.20646608 0.65231303 0.78852190 0.83710328 0.86798409 0.89244330 0.91267127
0.00000000 0.00000000 0.00000000 0.03777127 0.20678113 0.65383464 0.79072652 0.83889383 0.86952200 0.89382321 0.91392842
0.00000000 0.00000000 0.00000000 0.03741448 0.20714416 0.65536956 0.79303946 0.84080674 0.87118971 0.89533923 0.91532802
0.00000000 0.00000000 0.00000000 0.03710772 0.20755241 0.65689619 0.79538312 0.84276178 0.87290558 0.89690851 0.91678614
0.00000000 0.00000000 0.00000000 0.03684437 0.20800280 0.65834630 0.79748617 0.84448015 0.87438797 0.89824758 0.91801787
0.00000000 0.00000000 0.00000000 0.03661426 0.20848803 0.65974243 0.79945647 0.84607011 0.87574443 0.89946283 0.91912820
0.00000000 0.00000000 0.00000000 0.03641753 0.20900750 0.66118678 0.80172967 0.84797535 0.87742025 0.90099977 0.92056205
0.00000000 0.00000000 0.00000000 0.03623594 0.20955454 0.66262756 0.80410832 0.84999221 0.87920841 0.90264869 0.92210730
0.00000000 0.00000000 0.00000000 0.03604005 0.21010810 0.66404800 0.80657721 0.85210261 0.88108745 0.90438455 0.92373513
0.00000000 0.00000000 0.00000000 0.03583525 0.21065900 0.66546188 0.80922915 0.85440047 0.88315042 0.90629906 0.92553569
0.00000000 0.00000000 0.00000000 0.03563924 0.21121758 0.66673644 0.81144030 0.85625001 0.88475972 0.90775503 0.92687349
0.00000000 0.00000000 0.00000000 0.03545234 0.21178625 0.66786434 0.81316149 0.85760077 0.88586550 0.90870343 0.92770048
0.00000000 0.00000000 0.00000000 0.03527361 0.21236304 0.66900506 0.81515038 0.85922593 0.88724482 0.90992263 0.92879490
0.00000000 0.00000000 0.00000000 0.03510257 0.21295210 0.67006596 0.81695824 0.86066704 0.88843668 0.91095079 0.92969493
0.00000000 0.00000000 0.00000000 0.03491692 0.21353904 0.67104617 0.81862209 0.86195923 0.88947389 0.91181805 0.93042789
0.00000000 0.00000000 0.00000000 0.03471365 0.21411400 0.67196255 0.82025888 0.86322077 0.89047388 0.91264046 0.93110822
0.00000000 0.00000000 0.00000000 0.03450801 0.21468155 0.67282873 0.82193312 0.86451936 0.89150620 0.91348926 0.93180871
0.00000000 0.00000000 0.00000000 0.03431577 0.21525397 0.67376849 0.82428793 0.86651497 0.89323650 0.91503366 0.93320102
0.00000000 0.00000000 0.00000000 0.03413507 0.21583772 0.67462462 0.82647643 0.86834387 0.89479747 0.91640575 0.93441835
0.00000000 0.00000000 0.00000000 0.03394051 0.21641796 0.67545945 0.82891405 0.87042730 0.89660902 0.91802257 0.93587391
0.00000000 0.00000000 0.00000000 0.03372908 0.21698530 0.67622471 0.83138204 0.87254035 0.89844302 0.91965337 0.93733479
0.00000000 0.00000000 0.00000000 0.03350862 0.21754070 0.67683665 0.83338121 0.87417420 0.89978946 0.92078863 0.93829292
0.00000000 0.00000000 0.00000000 0.03328979 0.21808917 0.67732354 0.83505874 0.87548130 0.90080427 0.92158727 0.93891000
0.00000000 0.00000000 0.00000000 0.03308204 0.21863571 0.67766590 0.83625784 0.87630332 0.90133099 0.92189523 0.93903470
0.00000000 0.00000000 0.00000000 0.03290217 0.21919537 0.67786639 0.83691255 0.87657430 0.90130655 0.92165287 0.93861106
0.00000000 0.00000000 0.00000000 0.03273932 0.22359775 0.67808285 0.83814132 0.87743477 0.90187456 0.92200344 0.93878002
0.00000000 0.00000000 0.00000000 0.03258643 0.22696011 0.67834110 0.84026688 0.87921427 0.90336120 0.92326879 0.93985799
0.00000000 0.00000000 0.00000000 0.03242879 0.22832877 0.67847244 0.84215783 0.88075593 0.90460510 0.92428586 0.94068252
0.00000000 0.00000000 0.00000000 0.03227629 0.22880795 0.67851912 0.84427018 0.88252830 0.90607793 0.92552822 0.94172814
0.00000000 0.00000000 0.00000000 0.03213689 0.22928885 0.67838395 0.84574785 0.88366036 0.90691095 0.92613161 0.94213693
0.00000000 0.00000000 0.00000000 0.03202414 0.22978122 0.67812718 0.84718339 0.88475842 0.90771353 0.92670713 0.94252049
0.00000000 0.00000000 0.00000000 0.03192231 0.23028143 0.67767906 0.84791852 0.88514829 0.90780958 0.92657856 0.94220380
0.00000000 0.00000000 0.00000000 0.03182358 0.23078128 0.67782879 0.84867670 0.88556437 0.90793112 0.92647518 0.94191112
0.00000000 0.00000000 0.00000000 0.03172838 0.23128218 0.67791714 0.84972452 0.88627833 0.90835077 0.92666799 0.94191207
0.00000000 0.00000000 0.00000000 0.03163196 0.23178003 0.67796271 0.85139816 0.88763476 0.90941237 0.92749861 0.94254595
0.00000000 0.00000000 0.00000000 0.03153676 0.23227476 0.67791390 0.85344294 0.88937563 0.91085816 0.92871047 0.94355762
0.00000000 0.00000000 0.00000000 0.03144496 0.23276657 0.67770036 0.85535987 0.89099169 0.91217851 0.92979548 0.94444109
0.00000000 0.00000000 0.00000000 0.03135983 0.23325760 0.67730160 0.85718071 0.89251714 0.91340928 0.93079102 0.94523522
0.00000000 0.00000000 0.00000000 0.03128064 0.23374680 0.67667175 0.85890884 0.89395546 0.91455381 0.93170029 0.94594306
0.00000000 0.00000000 0.00000000 0.03120621 0.23423252 0.67566653 0.86113495 0.89591193 0.91621793 0.93312735 0.94716625
0.00000000 0.00000000 0.00000000 0.03113863 0.23471469 0.67427351 0.86304143 0.89755305 0.91756824 0.93424206 0.94807877
0.00000000 0.00000000 0.00000000 0.03107734 0.23519260 0.67289999 0.86484046 0.89909519 0.91882129 0.93526033 0.94889568
0.00000000 0.00000000 0.00000000 0.03102195 0.23566619 0.67154533 0.86657640 0.90058307 0.92002180 0.93622672 0.94966129
0.00000000 0.00000000 0.00000000 0.03097209 0.23613548 0.67020934 0.86838822 0.90215869 0.92131206 0.93728322 0.95051719
0.00000000 0.00000000 0.00000000 0.03092823 0.23660088 0.66889217 0.87010332 0.90364569 0.92251598 0.93825476 0.95128944
0.00000000 0.00000000 0.00000000 0.03089122 0.23706320 0.66759379 0.87160081 0.90492028 0.92351034 0.93901910 0.95185695
0.00000000 0.00000000 0.00000000 0.03086016 0.23752177 0.66631313 0.87314188 0.90624879 0.92456132 0.93984128 0.95248331
0.00000000 0.00000000 0.00000000 0.03083585 0.23797733 0.66505143 0.87514459 0.90805992 0.92609843 0.94114991 0.95359576
0.00000000 0.00000000 0.00000000 0.03081815 0.23842987 0.66380981 0.87752477 0.91026869 0.92803673 0.94286046 0.95511021
0.00000000 0.00000000 0.00000000 0.03080688 0.23887923 0.66258875 0.88003216 0.91261961 0.93012067 0.94471824 0.95677313
0.00000000 0.00000000 0.00000000 0.03080283 0.23932624 0.66138836 0.88221397 0.91464928 0.93188704 0.94626206 0.95812586
0.00000000 0.00000000 0.00000000 0.03080445 0.23976996 0.66020646 0.88404235 0.91632713 0.93330464 0.94746024 0.95913628
0.00000000 0.00000000 0.00000000 0.03081291 0.24021174 0.65904353 0.88587207 0.91801654 0.93473807 0.94867715 0.96016814
0.00000000 0.00000000 0.00000000 0.03082631 0.24065020 0.65789712 0.88723529 0.91923618 0.93570436 0.94943020 0.96073970
0.00000000 0.00000000 0.00000000 0.03084405 0.24108587 0.65676712 0.88872525 0.92059334 0.93681174 0.95032614 0.96145557
0.00000000 0.00000000 0.00000000 0.03086563 0.24151782 0.65565395 0.89083680 0.92259543 0.93856768 0.95187046 0.96281869
0.00000000 0.00000000 0.00000000 0.03089328 0.24194722 0.65455795 0.89198152 0.92361676 0.93934698 0.95244489 0.96321953
0.00000000 0.00000000 0.00000000 0.03092757 0.24237472 0.65347758 0.89304975 0.92456678 0.94005912 0.95295543 0.96355960
0.00000000 0.00000000 0.00000000 0.03097088 0.24280306 0.65241606 0.89471818 0.92614123 0.94140207 0.95409947 0.96453486
0.00000000 0.00000000 0.00000000 0.03100937 0.24362134 0.65012849 0.89725906 0.92886073 0.94386848 0.95631245 0.96652736
0.00000000 0.00000000 0.00000000 0.03104786 0.24443962 0.64784091 0.89979994 0.93158022 0.94633489 0.95852543 0.96851987
0.00000000 0.00000000 0.00000000 0.03108636 0.24525790 0.64555334 0.90234083 0.93429972 0.94880130 0.96073840 0.97051238
0.00000000 0.00000000 0.00000000 0.03112485 0.24607618 0.64326576 0.90488171 0.93701921 0.95126772 0.96295138 0.97250488
0.00000000 0.00000000 0.00000000 0.03116334 0.24689446 0.64097819 0.90742259 0.93973871 0.95373413 0.96516436 0.97449739
0.00000000 0.00000000 0.00000000 0.03120183 0.24771274 0.63869061 0.90996347 0.94245820 0.95620054 0.96737733 0.97648989
0.00000000 0.00000000 0.00000000 0.03124032 0.24853103 0.63640303 0.91250435 0.94517770 0.95866695 0.96959031 0.97848240
0.00000000 0.00000000 0.00000000 0.03127882 0.24934931 0.63411546 0.91504523 0.94789719 0.96113336 0.97180329 0.98047490
0.00000000 0.00000000 0.00000000 0.03131731 0.25016759 0.63182788 0.91758611 0.95061669 0.96359977 0.97401626 0.98246741
0.00000000 0.00000000 0.00000000 0.03135580 0.25098587 0.62954031 0.92012699 0.95333618 0.96606618 0.97622924 0.98445992
0.00000000 0.00000000 0.00000000 0.03139429 0.25180415 0.62725273 0.92266787 0.95605568 0.96853259 0.97844222 0.98645242
0.00000000 0.00000000 0.00000000 0.03143279 0.25262243 0.62496516 0.92520875 0.95877517 0.97099900 0.98065519 0.98844493
0.00000000 0.00000000 0.00000000 0.03147128 0.25344071 0.62267758 0.92774963 0.96149466 0.97346541 0.98286817 0.99043743
0.00000000 0.00000000 0.00000000 0.03150977 0.25425900 0.62039001 0.93029051 0.96421416 0.97593182 0.98508115 0.99242994
0.00000000 0.00000000 0.00000000 0.03154826 0.25507728 0.61810243 0.93283139 0.96693365 0.97839823 0.98729412 0.99442244
0.00000000 0.00000000 0.00000000 0.03158676 0.25589556 0.61581485 0.93537227 0.96965315 0.98086464 0.98950710 0.99641495
0.00000000 0.00000000 0.00000000 0.03162525 0.25671384 0.61352728 0.93791315 0.97237264 0.98333105 0.99172008 0.99840746
0.00000000 0.00000000 0.00000000 0.03166374 0.25753212 0.61123970 0.94045403 0.97509214 0.98579746 0.99393305 1.00039996
0.00000000 0.00000000 0.00000000 0.03170223 0.25835040 0.60895213 0.94299492 0.97781163 0.98826387 0.99614603 1.00239247
0.00000000 0.00000000 0.00000000 0.03174072 0.25916868 0.60666455 0.94553580 0.98053113 0.99073028 0.99835901 1.00438497
[truncated: 41,746 more chars]
