# Supplementary material for: Technical Note: Comparison of methane ebullition modelling approaches used in terrestrial wetland models
Source: Copernicus journal article supplement (doi:10.5194/bg-2017-274), 2017-07-04
Supplement: Supplementary file 2 [file bg-2017-274-supplement.zip › ebullition_module/input/meteo.txt]

1 5.29 974.44
2 5.29 982.22
3 5.29 986.03
4 5.29 991.27
5 5.29 993.72
6 5.29 988.81
7 5.29 980.39
8 5.29 989.03
9 5.29 981.60
10 5.29 978.84
11 5.29 985.61
12 5.29 983.30
13 5.29 975.19
14 5.29 983.53
15 5.29 996.61
16 5.29 996.40
17 5.29 983.91
18 5.29 988.85
19 5.29 991.79
20 5.29 1001.10
21 5.29 1004.30
22 5.29 995.77
23 5.29 997.07
24 5.29 983.21
25 5.29 978.79
26 5.29 989.63
27 5.29 990.84
28 5.29 982.81
29 5.29 974.79
30 5.29 982.31
31 5.29 983.32
32 5.29 980.81
33 5.29 978.60
34 5.29 974.74
35 5.29 967.00
36 5.29 964.65
37 5.29 974.61
38 5.29 980.69
39 5.29 966.31
40 5.29 983.16
41 5.29 996.29
42 5.29 991.72
43 5.29 995.18
44 5.29 998.63
45 5.29 1002.10
46 5.29 1005.50
47 5.29 1004.90
48 5.29 1010.70
49 5.29 1011.40
50 5.29 1008.50
51 5.29 1007.80
52 5.29 1014.40
53 5.29 1012.80
54 5.29 1013.10
55 5.29 1013.50
56 5.29 1009.00
57 5.29 1001.50
58 5.29 1006.30
59 5.29 1010.30
60 -6.26 1013.40
61 -1.45 1011.30
62 0.32 1008.20
63 -0.29 1005.20
64 -0.94 1002.10
65 -4.58 999.10
66 -5.37 996.05
67 -2.13 993.00
68 -0.40 982.07
69 0.40 974.84
70 -0.60 966.29
71 -3.14 978.57
72 -3.96 989.56
73 -1.60 994.16
74 -6.22 1011.10
75 -9.57 1018.40
76 -6.64 1013.40
77 -0.41 1002.50
78 -1.95 996.70
79 -3.40 998.84
80 -1.00 992.10
81 4.54 984.42
82 0.25 986.59
83 -3.59 980.67
84 -7.89 978.54
85 -6.54 981.44
86 -3.79 978.96
87 -2.78 973.77
88 -7.13 981.05
89 -6.86 989.91
90 -4.83 999.36
91 -1.20 994.44
92 1.34 993.38
93 3.00 990.05
94 2.94 984.15
95 3.14 987.43
96 2.33 979.83
97 1.49 972.23
98 1.51 969.93
99 2.54 981.17
100 3.11 991.30
101 0.97 989.97
102 2.09 987.13
103 3.02 988.74
104 3.29 992.66
105 4.40 991.75
106 6.76 988.02
107 7.92 986.99
108 6.00 991.56
109 3.33 1001.20
110 2.51 998.10
111 6.14 997.14
112 7.67 1000.40
113 7.88 1004.00
114 10.24 1002.70
115 11.94 1002.40
116 10.14 1000.50
117 8.49 1005.30
118 5.87 1005.90
119 5.69 1003.70
120 4.22 1002.70
121 2.36 1002.20
122 2.00 998.97
123 3.36 996.75
124 4.10 996.33
125 6.17 996.48
126 6.47 1003.00
127 7.37 1010.90
128 10.30 1015.90
129 12.31 1012.90
130 13.19 1008.40
131 13.97 1002.60
132 11.48 995.16
133 9.82 994.54
134 9.32 994.69
135 10.17 994.41
136 8.98 988.45
137 8.51 983.59
138 9.21 983.24
139 9.01 988.23
140 12.43 992.17
141 9.75 994.76
142 12.92 998.57
143 10.46 990.97
144 11.58 988.23
145 9.29 984.48
146 9.01 989.94
147 7.61 990.55
148 11.00 984.68
149 8.75 987.18
150 9.53 988.66
151 16.47 998.41
152 20.48 996.81
153 14.26 1000.50
154 14.24 1004.20
155 15.78 1000.90
156 12.05 1001.60
157 15.56 998.72
158 22.09 994.24
159 22.78 994.72
160 20.06 994.48
161 22.61 993.61
162 22.52 994.06
163 19.23 990.65
164 10.72 990.41
165 9.12 989.76
166 11.11 988.98
167 13.59 990.97
168 14.74 989.50
169 13.55 983.40
170 14.71 981.84
171 13.96 976.58
172 12.89 977.04
173 15.15 984.42
174 13.18 984.99
175 14.50 985.38
176 12.42 990.08
177 14.62 993.73
178 16.72 997.67
179 18.70 1002.70
180 21.05 1001.90
181 20.67 998.33
182 22.27 994.55
183 21.76 995.40
184 17.36 996.25
185 11.98 997.10
186 14.81 997.95
187 18.31 993.62
188 19.96 992.38
189 21.72 994.26
190 21.67 995.10
191 20.39 996.29
192 18.84 995.44
193 15.67 988.48
194 14.04 992.33
195 13.17 997.93
196 14.04 993.32
197 15.17 985.38
198 15.71 986.95
199 18.74 989.02
200 18.34 988.31
201 18.03 991.22
202 18.72 988.16
203 23.52 986.79
204 22.65 985.82
205 19.24 988.95
206 17.35 995.65
207 18.82 995.25
208 21.34 997.55
209 21.37 995.88
210 21.00 991.36
211 17.54 992.02
212 16.35 993.50
213 11.56 998.01
214 11.73 1003.00
215 14.93 1003.00
216 15.68 998.51
217 17.07 994.25
218 15.82 987.02
219 18.50 981.73
220 16.67 975.49
221 14.31 977.91
222 11.98 981.27
223 10.90 985.01
224 11.99 991.47
225 12.53 996.84
226 13.87 999.80
227 15.88 998.41
228 17.40 994.44
229 16.89 993.21
230 13.77 991.55
231 14.27 991.21
232 12.47 991.40
233 13.52 995.99
234 15.52 996.19
235 15.06 997.95
236 15.10 998.70
237 14.21 999.45
238 17.91 1000.20
239 21.20 996.67
240 18.52 988.84
241 13.69 986.23
242 12.93 981.40
243 11.70 984.03
244 12.30 986.66
245 12.78 989.30
246 12.37 994.52
247 12.63 999.53
248 15.40 998.60
249 13.85 991.00
250 13.32 982.69
251 13.39 975.96
252 12.13 979.93
253 10.01 983.91
254 11.60 990.50
255 12.61 983.89
256 13.04 969.75
257 12.24 961.43
258 12.65 970.90
259 11.06 983.91
260 10.16 992.19
261 7.65 998.14
262 10.12 997.65
263 12.11 991.38
264 11.84 991.24
265 10.55 980.74
266 9.12 974.47
267 6.55 983.85
268 6.75 996.32
269 6.91 999.10
270 11.16 993.87
271 8.99 994.01
272 9.42 995.23
273 14.11 993.61
274 7.03 1004.30
275 7.06 999.28
276 6.71 989.29
277 7.22 977.51
278 9.27 973.21
279 9.51 968.91
280 8.39 963.86
281 6.26 978.04
282 3.10 989.54
283 6.60 977.31
284 5.70 967.31
285 3.61 974.77
286 4.27 994.04
287 1.86 1008.80
288 3.60 1007.50
289 6.02 1001.10
290 6.24 994.75
291 7.65 984.25
292 5.80 973.82
293 5.64 979.11
294 3.69 988.50
295 5.02 991.76
296 3.19 1002.90
297 5.54 1007.10
298 5.89 1009.00
299 4.80 1010.70
300 4.03 1008.50
301 6.31 1002.80
302 6.16 996.16
303 6.60 988.96
304 7.18 987.31
305 5.56 993.46
306 9.23 992.69
307 7.45 996.83
308 6.91 1000.30
309 7.33 1004.90
310 5.83 1007.50
311 5.65 1003.30
312 5.71 1001.20
313 -0.20 1009.30
314 0.35 1012.30
315 4.08 1014.10
316 1.73 1017.80
317 2.83 1007.00
318 3.23 994.99
319 -1.62 1000.70
320 1.80 995.86
321 3.39 991.10
322 3.40 988.62
323 1.04 988.00
324 -7.12 1003.30
325 -0.84 999.09
326 0.35 1003.80
327 1.90 1002.90
328 3.98 990.42
329 4.36 981.79
330 2.95 969.90
331 0.70 957.02
332 -0.04 969.32
333 -0.66 988.88
334 4.41 982.19
335 2.53 986.46
336 2.81 971.90
337 0.24 971.16
338 1.85 955.12
339 -0.82 954.49
340 -1.07 959.91
341 -1.50 973.03
342 0.10 980.90
343 -0.91 977.58
344 0.16 975.28
345 -0.69 972.98
346 -2.15 984.21
347 0.69 977.20
348 1.76 974.87
349 1.63 973.48
350 1.71 975.27
351 0.07 973.26
352 0.95 968.57
353 0.68 969.64
354 0.09 980.43
355 -0.50 989.69
356 -1.23 993.49
357 0.19 987.06
358 1.15 979.67
359 -0.45 980.42
360 3.13 970.20
361 2.89 973.36
362 -0.76 987.92
363 1.80 966.86
364 -0.38 965.45
365 -0.38 979.85
366 5.29 974.44
367 5.29 982.22
368 5.29 986.03
369 5.29 991.27
370 5.29 993.72
371 5.29 988.81
372 5.29 980.39
373 5.29 989.03
374 5.29 981.60
375 5.29 978.84
376 5.29 985.61
377 5.29 983.30
378 5.29 975.19
379 5.29 983.53
380 5.29 996.61
381 5.29 996.40
382 5.29 983.91
383 5.29 988.85
384 5.29 991.79
385 5.29 1001.10
386 5.29 1004.30
387 5.29 995.77
388 5.29 997.07
389 5.29 983.21
390 5.29 978.79
391 5.29 989.63
392 5.29 990.84
393 5.29 982.81
394 5.29 974.79
395 5.29 982.31
396 5.29 983.32
397 5.29 980.81
398 5.29 978.60
399 5.29 974.74
400 5.29 967.00
401 5.29 964.65
402 5.29 974.61
403 5.29 980.69
404 5.29 966.31
405 5.29 983.16
406 5.29 996.29
407 5.29 991.72
408 5.29 995.18
409 5.29 998.63
410 5.29 1002.10
411 5.29 1005.50
412 5.29 1004.90
413 5.29 1010.70
414 5.29 1011.40
415 5.29 1008.50
416 5.29 1007.80
417 5.29 1014.40
418 5.29 1012.80
419 5.29 1013.10
420 5.29 1013.50
421 5.29 1009.00
422 5.29 1001.50
423 5.29 1006.30
424 5.29 1010.30
425 -6.26 1013.40
426 -1.45 1011.30
427 0.32 1008.20
428 -0.29 1005.20
429 -0.94 1002.10
430 -4.58 999.10
431 -5.37 996.05
432 -2.13 993.00
433 -0.40 982.07
434 0.40 974.84
435 -0.60 966.29
436 -3.14 978.57
437 -3.96 989.56
438 -1.60 994.16
439 -6.22 1011.10
440 -9.57 1018.40
441 -6.64 1013.40
442 -0.41 1002.50
443 -1.95 996.70
444 -3.40 998.84
445 -1.00 992.10
446 4.54 984.42
447 0.25 986.59
448 -3.59 980.67
449 -7.89 978.54
450 -6.54 981.44
451 -3.79 978.96
452 -2.78 973.77
453 -7.13 981.05
454 -6.86 989.91
455 -4.83 999.36
456 -1.20 994.44
457 1.34 993.38
458 3.00 990.05
459 2.94 984.15
460 3.14 987.43
461 2.33 979.83
462 1.49 972.23
463 1.51 969.93
464 2.54 981.17
465 3.11 991.30
466 0.97 989.97
467 2.09 987.13
468 3.02 988.74
469 3.29 992.66
470 4.40 991.75
471 6.76 988.02
472 7.92 986.99
473 6.00 991.56
474 3.33 1001.20
475 2.51 998.10
476 6.14 997.14
477 7.67 1000.40
478 7.88 1004.00
479 10.24 1002.70
480 11.94 1002.40
481 10.14 1000.50
482 8.49 1005.30
483 5.87 1005.90
484 5.69 1003.70
485 4.22 1002.70
486 2.36 1002.20
487 2.00 998.97
488 3.36 996.75
489 4.10 996.33
490 6.17 996.48
491 6.47 1003.00
492 7.37 1010.90
493 10.30 1015.90
494 12.31 1012.90
495 13.19 1008.40
496 13.97 1002.60
497 11.48 995.16
498 9.82 994.54
499 9.32 994.69
500 10.17 994.41
501 8.98 988.45
502 8.51 983.59
503 9.21 983.24
504 9.01 988.23
505 12.43 992.17
506 9.75 994.76
507 12.92 998.57
508 10.46 990.97
509 11.58 988.23
510 9.29 984.48
511 9.01 989.94
512 7.61 990.55
513 11.00 984.68
514 8.75 987.18
515 9.53 988.66
516 16.47 998.41
517 20.48 996.81
518 14.26 1000.50
519 14.24 1004.20
520 15.78 1000.90
521 12.05 1001.60
522 15.56 998.72
523 22.09 994.24
524 22.78 994.72
525 20.06 994.48
526 22.61 993.61
527 22.52 994.06
528 19.23 990.65
529 10.72 990.41
530 9.12 989.76
531 11.11 988.98
532 13.59 990.97
533 14.74 989.50
534 13.55 983.40
535 14.71 981.84
536 13.96 976.58
537 12.89 977.04
538 15.15 984.42
539 13.18 984.99
540 14.50 985.38
541 12.42 990.08
542 14.62 993.73
543 16.72 997.67
544 18.70 1002.70
545 21.05 1001.90
546 20.67 998.33
547 22.27 994.55
548 21.76 995.40
549 17.36 996.25
550 11.98 997.10
551 14.81 997.95
552 18.31 993.62
553 19.96 992.38
554 21.72 994.26
555 21.67 995.10
556 20.39 996.29
557 18.84 995.44
558 15.67 988.48
559 14.04 992.33
560 13.17 997.93
561 14.04 993.32
562 15.17 985.38
563 15.71 986.95
564 18.74 989.02
565 18.34 988.31
566 18.03 991.22
567 18.72 988.16
568 23.52 986.79
569 22.65 985.82
570 19.24 988.95
571 17.35 995.65
572 18.82 995.25
573 21.34 997.55
574 21.37 995.88
575 21.00 991.36
576 17.54 992.02
577 16.35 993.50
578 11.56 998.01
579 11.73 1003.00
580 14.93 1003.00
581 15.68 998.51
582 17.07 994.25
583 15.82 987.02
584 18.50 981.73
585 16.67 975.49
586 14.31 977.91
587 11.98 981.27
588 10.90 985.01
589 11.99 991.47
590 12.53 996.84
591 13.87 999.80
592 15.88 998.41
593 17.40 994.44
594 16.89 993.21
595 13.77 991.55
596 14.27 991.21
597 12.47 991.40
598 13.52 995.99
599 15.52 996.19
600 15.06 997.95
601 15.10 998.70
602 14.21 999.45
603 17.91 1000.20
604 21.20 996.67
605 18.52 988.84
606 13.69 986.23
607 12.93 981.40
608 11.70 984.03
609 12.30 986.66
610 12.78 989.30
611 12.37 994.52
612 12.63 999.53
613 15.40 998.60
614 13.85 991.00
615 13.32 982.69
616 13.39 975.96
617 12.13 979.93
618 10.01 983.91
619 11.60 990.50
620 12.61 983.89
621 13.04 969.75
622 12.24 961.43
623 12.65 970.90
624 11.06 983.91
625 10.16 992.19
626 7.65 998.14
627 10.12 997.65
628 12.11 991.38
629 11.84 991.24
630 10.55 980.74
631 9.12 974.47
632 6.55 983.85
633 6.75 996.32
634 6.91 999.10
635 11.16 993.87
636 8.99 994.01
637 9.42 995.23
638 14.11 993.61
639 7.03 1004.30
640 7.06 999.28
641 6.71 989.29
642 7.22 977.51
643 9.27 973.21
644 9.51 968.91
645 8.39 963.86
646 6.26 978.04
647 3.10 989.54
648 6.60 977.31
649 5.70 967.31
650 3.61 974.77
651 4.27 994.04
652 1.86 1008.80
653 3.60 1007.50
654 6.02 1001.10
655 6.24 994.75
656 7.65 984.25
657 5.80 973.82
658 5.64 979.11
659 3.69 988.50
660 5.02 991.76
661 3.19 1002.90
662 5.54 1007.10
663 5.89 1009.00
664 4.80 1010.70
665 4.03 1008.50
666 6.31 1002.80
667 6.16 996.16
668 6.60 988.96
669 7.18 987.31
670 5.56 993.46
671 9.23 992.69
672 7.45 996.83
673 6.91 1000.30
674 7.33 1004.90
675 5.83 1007.50
676 5.65 1003.30
677 5.71 1001.20
678 -0.20 1009.30
679 0.35 1012.30
680 4.08 1014.10
681 1.73 1017.80
682 2.83 1007.00
683 3.23 994.99
684 -1.62 1000.70
685 1.80 995.86
686 3.39 991.10
687 3.40 988.62
688 1.04 988.00
689 -7.12 1003.30
690 -0.84 999.09
691 0.35 1003.80
692 1.90 1002.90
693 3.98 990.42
694 4.36 981.79
695 2.95 969.90
696 0.70 957.02
697 -0.04 969.32
698 -0.66 988.88
699 4.41 982.19
700 2.53 986.46
701 2.81 971.90
702 0.24 971.16
703 1.85 955.12
704 -0.82 954.49
705 -1.07 959.91
706 -1.50 973.03
707 0.10 980.90
708 -0.91 977.58
709 0.16 975.28
710 -0.69 972.98
711 -2.15 984.21
712 0.69 977.20
713 1.76 974.87
714 1.63 973.48
715 1.71 975.27
716 0.07 973.26
717 0.95 968.57
718 0.68 969.64
719 0.09 980.43
720 -0.50 989.69
721 -1.23 993.49
722 0.19 987.06
723 1.15 979.67
724 -0.45 980.42
725 3.13 970.20
726 2.89 973.36
727 -0.76 987.92
728 1.80 966.86
729 -0.38 965.45
730 -0.38 979.85
731 5.29 974.44
732 5.29 982.22
733 5.29 986.03
734 5.29 991.27
735 5.29 993.72
736 5.29 988.81
737 5.29 980.39
738 5.29 989.03
739 5.29 981.60
740 5.29 978.84
741 5.29 985.61
742 5.29 983.30
743 5.29 975.19
744 5.29 983.53
745 5.29 996.61
746 5.29 996.40
747 5.29 983.91
748 5.29 988.85
749 5.29 991.79
750 5.29 1001.10
751 5.29 1004.30
752 5.29 995.77
753 5.29 997.07
754 5.29 983.21
755 5.29 978.79
756 5.29 989.63
757 5.29 990.84
758 5.29 982.81
759 5.29 974.79
760 5.29 982.31
761 5.29 983.32
762 5.29 980.81
763 5.29 978.60
764 5.29 974.74
765 5.29 967.00
766 5.29 964.65
767 5.29 974.61
768 5.29 980.69
769 5.29 966.31
770 5.29 983.16
771 5.29 996.29
772 5.29 991.72
773 5.29 995.18
774 5.29 998.63
775 5.29 1002.10
776 5.29 1005.50
777 5.29 1004.90
778 5.29 1010.70
779 5.29 1011.40
780 5.29 1008.50
781 5.29 1007.80
782 5.29 1014.40
783 5.29 1012.80
784 5.29 1013.10
785 5.29 1013.50
786 5.29 1009.00
787 5.29 1001.50
788 5.29 1006.30
789 5.29 1010.30
790 -6.26 1013.40
791 -1.45 1011.30
792 0.32 1008.20
793 -0.29 1005.20
794 -0.94 1002.10
795 -4.58 999.10
796 -5.37 996.05
797 -2.13 993.00
798 -0.40 982.07
799 0.40 974.84
800 -0.60 966.29
801 -3.14 978.57
802 -3.96 989.56
803 -1.60 994.16
804 -6.22 1011.10
805 -9.57 1018.40
806 -6.64 1013.40
807 -0.41 1002.50
808 -1.95 996.70
809 -3.40 998.84
810 -1.00 992.10
811 4.54 984.42
812 0.25 986.59
813 -3.59 980.67
814 -7.89 978.54
815 -6.54 981.44
816 -3.79 978.96
817 -2.78 973.77
818 -7.13 981.05
819 -6.86 989.91
820 -4.83 999.36
821 -1.20 994.44
822 1.34 993.38
823 3.00 990.05
824 2.94 984.15
825 3.14 987.43
826 2.33 979.83
827 1.49 972.23
828 1.51 969.93
829 2.54 981.17
830 3.11 991.30
831 0.97 989.97
832 2.09 987.13
833 3.02 988.74
834 3.29 992.66
835 4.40 991.75
836 6.76 988.02
837 7.92 986.99
838 6.00 991.56
839 3.33 1001.20
840 2.51 998.10
841 6.14 997.14
842 7.67 1000.40
843 7.88 1004.00
844 10.24 1002.70
845 11.94 1002.40
846 10.14 1000.50
847 8.49 1005.30
848 5.87 1005.90
849 5.69 1003.70
850 4.22 1002.70
851 2.36 1002.20
852 2.00 998.97
853 3.36 996.75
854 4.10 996.33
855 6.17 996.48
856 6.47 1003.00
857 7.37 1010.90
858 10.30 1015.90
859 12.31 1012.90
860 13.19 1008.40
861 13.97 1002.60
862 11.48 995.16
863 9.82 994.54
864 9.32 994.69
865 10.17 994.41
866 8.98 988.45
867 8.51 983.59
868 9.21 983.24
869 9.01 988.23
870 12.43 992.17
871 9.75 994.76
872 12.92 998.57
873 10.46 990.97
874 11.58 988.23
875 9.29 984.48
876 9.01 989.94
877 7.61 990.55
878 11.00 984.68
879 8.75 987.18
880 9.53 988.66
881 16.47 998.41
882 20.48 996.81
883 14.26 1000.50
884 14.24 1004.20
885 15.78 1000.90
886 12.05 1001.60
887 15.56 998.72
888 22.09 994.24
889 22.78 994.72
890 20.06 994.48
891 22.61 993.61
892 22.52 994.06
893 19.23 990.65
894 10.72 990.41
895 9.12 989.76
896 11.11 988.98
897 13.59 990.97
898 14.74 989.50
899 13.55 983.40
900 14.71 981.84
901 13.96 976.58
902 12.89 977.04
903 15.15 984.42
904 13.18 984.99
905 14.50 985.38
906 12.42 990.08
907 14.62 993.73
908 16.72 997.67
909 18.70 1002.70
910 21.05 1001.90
911 20.67 998.33
912 22.27 994.55
913 21.76 995.40
914 17.36 996.25
915 11.98 997.10
916 14.81 997.95
917 18.31 993.62
918 19.96 992.38
919 21.72 994.26
920 21.67 995.10
921 20.39 996.29
922 18.84 995.44
923 15.67 988.48
924 14.04 992.33
925 13.17 997.93
926 14.04 993.32
927 15.17 985.38
928 15.71 986.95
929 18.74 989.02
930 18.34 988.31
931 18.03 991.22
932 18.72 988.16
933 23.52 986.79
934 22.65 985.82
935 19.24 988.95
936 17.35 995.65
937 18.82 995.25
938 21.34 997.55
939 21.37 995.88
940 21.00 991.36
941 17.54 992.02
942 16.35 993.50
943 11.56 998.01
944 11.73 1003.00
945 14.93 1003.00
946 15.68 998.51
947 17.07 994.25
948 15.82 987.02
949 18.50 981.73
950 16.67 975.49
951 14.31 977.91
952 11.98 981.27
953 10.90 985.01
954 11.99 991.47
955 12.53 996.84
956 13.87 999.80
957 15.88 998.41
958 17.40 994.44
959 16.89 993.21
960 13.77 991.55
961 14.27 991.21
962 12.47 991.40
963 13.52 995.99
964 15.52 996.19
965 15.06 997.95
966 15.10 998.70
967 14.21 999.45
968 17.91 1000.20
969 21.20 996.67
970 18.52 988.84
971 13.69 986.23
972 12.93 981.40
973 11.70 984.03
974 12.30 986.66
975 12.78 989.30
976 12.37 994.52
977 12.63 999.53
978 15.40 998.60
979 13.85 991.00
980 13.32 982.69
981 13.39 975.96
982 12.13 979.93
983 10.01 983.91
984 11.60 990.50
985 12.61 983.89
986 13.04 969.75
987 12.24 961.43
988 12.65 970.90
989 11.06 983.91
990 10.16 992.19
991 7.65 998.14
992 10.12 997.65
993 12.11 991.38
994 11.84 991.24
995 10.55 980.74
996 9.12 974.47
997 6.55 983.85
998 6.75 996.32
999 6.91 999.10
1000 11.16 993.87
1001 8.99 994.01
1002 9.42 995.23
1003 14.11 993.61
1004 7.03 1004.30
1005 7.06 999.28
1006 6.71 989.29
1007 7.22 977.51
1008 9.27 973.21
1009 9.51 968.91
1010 8.39 963.86
1011 6.26 978.04
1012 3.10 989.54
1013 6.60 977.31
1014 5.70 967.31
1015 3.61 974.77
1016 4.27 994.04
1017 1.86 1008.80
1018 3.60 1007.50
1019 6.02 1001.10
1020 6.24 994.75
1021 7.65 984.25
1022 5.80 973.82
1023 5.64 979.11
1024 3.69 988.50
1025 5.02 991.76
1026 3.19 1002.90
1027 5.54 1007.10
1028 5.89 1009.00
1029 4.80 1010.70
1030 4.03 1008.50
1031 6.31 1002.80
1032 6.16 996.16
1033 6.60 988.96
1034 7.18 987.31
1035 5.56 993.46
1036 9.23 992.69
1037 7.45 996.83
1038 6.91 1000.30
1039 7.33 1004.90
1040 5.83 1007.50
1041 5.65 1003.30
1042 5.71 1001.20
1043 -0.20 1009.30
1044 0.35 1012.30
1045 4.08 1014.10
1046 1.73 1017.80
1047 2.83 1007.00
1048 3.23 994.99
1049 -1.62 1000.70
1050 1.80 995.86
1051 3.39 991.10
1052 3.40 988.62
1053 1.04 988.00
1054 -7.12 1003.30
1055 -0.84 999.09
1056 0.35 1003.80
1057 1.90 1002.90
1058 3.98 990.42
1059 4.36 981.79
1060 2.95 969.90
1061 0.70 957.02
1062 -0.04 969.32
1063 -0.66 988.88
1064 4.41 982.19
1065 2.53 986.46
1066 2.81 971.90
1067 0.24 971.16
1068 1.85 955.12
1069 -0.82 954.49
1070 -1.07 959.91
1071 -1.50 973.03
1072 0.10 980.90
1073 -0.91 977.58
1074 0.16 975.28
1075 -0.69 972.98
1076 -2.15 984.21
1077 0.69 977.20
1078 1.76 974.87
1079 1.63 973.48
1080 1.71 975.27
1081 0.07 973.26
1082 0.95 968.57
1083 0.68 969.64
1084 0.09 980.43
1085 -0.50 989.69
1086 -1.23 993.49
1087 0.19 987.06
1088 1.15 979.67
1089 -0.45 980.42
1090 3.13 970.20
1091 2.89 973.36
1092 -0.76 987.92
1093 1.80 966.86
1094 -0.38 965.45
1095 -0.38 979.85
1096 5.29 974.44
1097 5.29 982.22
1098 5.29 986.03
1099 5.29 991.27
1100 5.29 993.72
1101 5.29 988.81
1102 5.29 980.39
1103 5.29 989.03
1104 5.29 981.60
1105 5.29 978.84
1106 5.29 985.61
1107 5.29 983.30
1108 5.29 975.19
1109 5.29 983.53
1110 5.29 996.61
1111 5.29 996.40
1112 5.29 983.91
1113 5.29 988.85
1114 5.29 991.79
1115 5.29 1001.10
1116 5.29 1004.30
1117 5.29 995.77
1118 5.29 997.07
1119 5.29 983.21
1120 5.29 978.79
1121 5.29 989.63
1122 5.29 990.84
1123 5.29 982.81
1124 5.29 974.79
1125 5.29 982.31
1126 5.29 983.32
1127 5.29 980.81
1128 5.29 978.60
1129 5.29 974.74
1130 5.29 967.00
1131 5.29 964.65
1132 5.29 974.61
1133 5.29 980.69
1134 5.29 966.31
1135 5.29 983.16
1136 5.29 996.29
1137 5.29 991.72
1138 5.29 995.18
1139 5.29 998.63
1140 5.29 1002.10
1141 5.29 1005.50
1142 5.29 1004.90
1143 5.29 1010.70
1144 5.29 1011.40
1145 5.29 1008.50
1146 5.29 1007.80
1147 5.29 1014.40
1148 5.29 1012.80
1149 5.29 1013.10
1150 5.29 1013.50
1151 5.29 1009.00
1152 5.29 1001.50
1153 5.29 1006.30
1154 5.29 1010.30
1155 -6.26 1013.40
1156 -1.45 1011.30
1157 0.32 1008.20
1158 -0.29 1005.20
1159 -0.94 1002.10
1160 -4.58 999.10
1161 -5.37 996.05
1162 -2.13 993.00
1163 -0.40 982.07
1164 0.40 974.84
1165 -0.60 966.29
1166 -3.14 978.57
1167 -3.96 989.56
1168 -1.60 994.16
1169 -6.22 1011.10
1170 -9.57 1018.40
1171 -6.64 1013.40
1172 -0.41 1002.50
1173 -1.95 996.70
1174 -3.40 998.84
1175 -1.00 992.10
1176 4.54 984.42
1177 0.25 986.59
1178 -3.59 980.67
1179 -7.89 978.54
1180 -6.54 981.44
1181 -3.79 978.96
1182 -2.78 973.77
1183 -7.13 981.05
1184 -6.86 989.91
1185 -4.83 999.36
1186 -1.20 994.44
1187 1.34 993.38
1188 3.00 990.05
1189 2.94 984.15
1190 3.14 987.43
1191 2.33 979.83
1192 1.49 972.23
1193 1.51 969.93
1194 2.54 981.17
1195 3.11 991.30
1196 0.97 989.97
1197 2.09 987.13
1198 3.02 988.74
1199 3.29 992.66
1200 4.40 991.75
1201 6.76 988.02
1202 7.92 986.99
1203 6.00 991.56
1204 3.33 1001.20
1205 2.51 998.10
1206 6.14 997.14
1207 7.67 1000.40
1208 7.88 1004.00
1209 10.24 1002.70
1210 11.94 1002.40
1211 10.14 1000.50
1212 8.49 1005.30
1213 5.87 1005.90
1214 5.69 1003.70
1215 4.22 1002.70
1216 2.36 1002.20
1217 2.00 998.97
1218 3.36 996.75
1219 4.10 996.33
1220 6.17 996.48
1221 6.47 1003.00
1222 7.37 1010.90
1223 10.30 1015.90
1224 12.31 1012.90
1225 13.19 1008.40
1226 13.97 1002.60
1227 11.48 995.16
1228 9.82 994.54
1229 9.32 994.69
1230 10.17 994.41
1231 8.98 988.45
1232 8.51 983.59
1233 9.21 983.24
1234 9.01 988.23
1235 12.43 992.17
1236 9.75 994.76
1237 12.92 998.57
1238 10.46 990.97
1239 11.58 988.23
1240 9.29 984.48
1241 9.01 989.94
1242 7.61 990.55
1243 11.00 984.68
1244 8.75 987.18
1245 9.53 988.66
1246 16.47 998.41
1247 20.48 996.81
1248 14.26 1000.50
1249 14.24 1004.20
1250 15.78 1000.90
1251 12.05 1001.60
1252 15.56 998.72
1253 22.09 994.24
1254 22.78 994.72
1255 20.06 994.48
1256 22.61 993.61
1257 22.52 994.06
1258 19.23 990.65
1259 10.72 990.41
1260 9.12 989.76
1261 11.11 988.98
1262 13.59 990.97
1263 14.74 989.50
1264 13.55 983.40
1265 14.71 981.84
1266 13.96 976.58
1267 12.89 977.04
1268 15.15 984.42
1269 13.18 984.99
1270 14.50 985.38
1271 12.42 990.08
1272 14.62 993.73
1273 16.72 997.67
1274 18.70 1002.70
1275 21.05 1001.90
1276 20.67 998.33
1277 22.27 994.55
1278 21.76 995.40
1279 17.36 996.25
1280 11.98 997.10
1281 14.81 997.95
1282 18.31 993.62
1283 19.96 992.38
1284 21.72 994.26
1285 21.67 995.10
1286 20.39 996.29
1287 18.84 995.44
1288 15.67 988.48
1289 14.04 992.33
1290 13.17 997.93
1291 14.04 993.32
1292 15.17 985.38
1293 15.71 986.95
1294 18.74 989.02
1295 18.34 988.31
1296 18.03 991.22
1297 18.72 988.16
1298 23.52 986.79
1299 22.65 985.82
1300 19.24 988.95
1301 17.35 995.65
1302 18.82 995.25
1303 21.34 997.55
1304 21.37 995.88
1305 21.00 991.36
1306 17.54 992.02
1307 16.35 993.50
1308 11.56 998.01
1309 11.73 1003.00
1310 14.93 1003.00
1311 15.68 998.51
1312 17.07 994.25
1313 15.82 987.02
1314 18.50 981.73
1315 16.67 975.49
1316 14.31 977.91
1317 11.98 981.27
1318 10.90 985.01
1319 11.99 991.47
1320 12.53 996.84
1321 13.87 999.80
1322 15.88 998.41
1323 17.40 994.44
1324 16.89 993.21
1325 13.77 991.55
1326 14.27 991.21
1327 12.47 991.40
1328 13.52 995.99
1329 15.52 996.19
1330 15.06 997.95
1331 15.10 998.70
1332 14.21 999.45
1333 17.91 1000.20
1334 21.20 996.67
1335 18.52 988.84
1336 13.69 986.23
1337 12.93 981.40
1338 11.70 984.03
1339 12.30 986.66
1340 12.78 989.30
1341 12.37 994.52
1342 12.63 999.53
1343 15.40 998.60
1344 13.85 991.00
1345 13.32 982.69
1346 13.39 975.96
1347 12.13 979.93
1348 10.01 983.91
1349 11.60 990.50
1350 12.61 983.89
1351 13.04 969.75
1352 12.24 961.43
1353 12.65 970.90
1354 11.06 983.91
1355 10.16 992.19
1356 7.65 998.14
1357 10.12 997.65
1358 12.11 991.38
1359 11.84 991.24
1360 10.55 980.74
1361 9.12 974.47
1362 6.55 983.85
1363 6.75 996.32
1364 6.91 999.10
1365 11.16 993.87
1366 8.99 994.01
1367 9.42 995.23
1368 14.11 993.61
1369 7.03 1004.30
1370 7.06 999.28
1371 6.71 989.29
1372 7.22 977.51
1373 9.27 973.21
1374 9.51 968.91
1375 8.39 963.86
1376 6.26 978.04
1377 3.10 989.54
1378 6.60 977.31
1379 5.70 967.31
1380 3.61 974.77
1381 4.27 994.04
1382 1.86 1008.80
1383 3.60 1007.50
1384 6.02 1001.10
1385 6.24 994.75
1386 7.65 984.25
1387 5.80 973.82
1388 5.64 979.11
1389 3.69 988.50
1390 5.02 991.76
1391 3.19 1002.90
1392 5.54 1007.10
1393 5.89 1009.00
1394 4.80 1010.70
1395 4.03 1008.50
1396 6.31 1002.80
1397 6.16 996.16
1398 6.60 988.96
1399 7.18 987.31
1400 5.56 993.46
1401 9.23 992.69
1402 7.45 996.83
1403 6.91 1000.30
1404 7.33 1004.90
1405 5.83 1007.50
1406 5.65 1003.30
1407 5.71 1001.20
1408 -0.20 1009.30
1409 0.35 1012.30
1410 4.08 1014.10
1411 1.73 1017.80
1412 2.83 1007.00
1413 3.23 994.99
1414 -1.62 1000.70
1415 1.80 995.86
1416 3.39 991.10
1417 3.40 988.62
1418 1.04 988.00
1419 -7.12 1003.30
1420 -0.84 999.09
1421 0.35 1003.80
1422 1.90 1002.90
1423 3.98 990.42
1424 4.36 981.79
1425 2.95 969.90
1426 0.70 957.02
1427 -0.04 969.32
1428 -0.66 988.88
1429 4.41 982.19
1430 2.53 986.46
1431 2.81 971.90
1432 0.24 971.16
1433 1.85 955.12
1434 -0.82 954.49
1435 -1.07 959.91
1436 -1.50 973.03
1437 0.10 980.90
1438 -0.91 977.58
1439 0.16 975.28
1440 -0.69 972.98
1441 -2.15 984.21
1442 0.69 977.20
1443 1.76 974.87
1444 1.63 973.48
1445 1.71 975.27
1446 0.07 973.26
1447 0.95 968.57
1448 0.68 969.64
1449 0.09 980.43
1450 -0.50 989.69
1451 -1.23 993.49
1452 0.19 987.06
1453 1.15 979.67
1454 -0.45 980.42
1455 3.13 970.20
1456 2.89 973.36
1457 -0.76 987.92
1458 1.80 966.86
1459 -0.38 965.45
1460 -0.38 979.85
1461 5.29 974.44
1462 5.29 982.22
1463 5.29 986.03
1464 5.29 991.27
1465 5.29 993.72
1466 5.29 988.81
1467 5.29 980.39
1468 5.29 989.03
1469 5.29 981.60
1470 5.29 978.84
1471 5.29 985.61
1472 5.29 983.30
1473 5.29 975.19
1474 5.29 983.53
1475 5.29 996.61
1476 5.29 996.40
1477 5.29 983.91
1478 5.29 988.85
1479 5.29 991.79
1480 5.29 1001.10
1481 5.29 1004.30
1482 5.29 995.77
1483 5.29 997.07
1484 5.29 983.21
1485 5.29 978.79
1486 5.29 989.63
1487 5.29 990.84
1488 5.29 982.81
1489 5.29 974.79
1490 5.29 982.31
1491 5.29 983.32
1492 5.29 980.81
1493 5.29 978.60
1494 5.29 974.74
1495 5.29 967.00
1496 5.29 964.65
1497 5.29 974.61
1498 5.29 980.69
1499 5.29 966.31
1500 5.29 983.16
1501 5.29 996.29
1502 5.29 991.72
1503 5.29 995.18
1504 5.29 998.63
1505 5.29 1002.10
1506 5.29 1005.50
1507 5.29 1004.90
1508 5.29 1010.70
1509 5.29 1011.40
1510 5.29 1008.50
1511 5.29 1007.80
1512 5.29 1014.40
1513 5.29 1012.80
1514 5.29 1013.10
1515 5.29 1013.50
1516 5.29 1009.00
1517 5.29 1001.50
1518 5.29 1006.30
1519 5.29 1010.30
1520 -6.26 1013.40
1521 -1.45 1011.30
1522 0.32 1008.20
1523 -0.29 1005.20
1524 -0.94 1002.10
1525 -4.58 999.10
1526 -5.37 996.05
1527 -2.13 993.00
1528 -0.40 982.07
1529 0.40 974.84
1530 -0.60 966.29
1531 -3.14 978.57
1532 -3.96 989.56
1533 -1.60 994.16
1534 -6.22 1011.10
1535 -9.57 1018.40
1536 -6.64 1013.40
1537 -0.41 1002.50
1538 -1.95 996.70
1539 -3.40 998.84
1540 -1.00 992.10
1541 4.54 984.42
1542 0.25 986.59
1543 -3.59 980.67
1544 -7.89 978.54
1545 -6.54 981.44
1546 -3.79 978.96
1547 -2.78 973.77
1548 -7.13 981.05
1549 -6.86 989.91
1550 -4.83 999.36
1551 -1.20 994.44
1552 1.34 993.38
1553 3.00 990.05
1554 2.94 984.15
1555 3.14 987.43
1556 2.33 979.83
1557 1.49 972.23
1558 1.51 969.93
1559 2.54 981.17
1560 3.11 991.30
1561 0.97 989.97
1562 2.09 987.13
1563 3.02 988.74
1564 3.29 992.66
1565 4.40 991.75
1566 6.76 988.02
1567 7.92 986.99
1568 6.00 991.56
1569 3.33 1001.20
1570 2.51 998.10
1571 6.14 997.14
1572 7.67 1000.40
1573 7.88 1004.00
1574 10.24 1002.70
1575 11.94 1002.40
1576 10.14 1000.50
1577 8.49 1005.30
1578 5.87 1005.90
1579 5.69 1003.70
1580 4.22 1002.70
1581 2.36 1002.20
1582 2.00 998.97
1583 3.36 996.75
1584 4.10 996.33
1585 6.17 996.48
1586 6.47 1003.00
1587 7.37 1010.90
1588 10.30 1015.90
1589 12.31 1012.90
1590 13.19 1008.40
1591 13.97 1002.60
1592 11.48 995.16
1593 9.82 994.54
1594 9.32 994.69
1595 10.17 994.41
1596 8.98 988.45
1597 8.51 983.59
1598 9.21 983.24
1599 9.01 988.23
1600 12.43 992.17
1601 9.75 994.76
1602 12.92 998.57
1603 10.46 990.97
1604 11.58 988.23
1605 9.29 984.48
1606 9.01 989.94
1607 7.61 990.55
1608 11.00 984.68
1609 8.75 987.18
1610 9.53 988.66
1611 16.47 998.41
1612 20.48 996.81
1613 14.26 1000.50
1614 14.24 1004.20
1615 15.78 1000.90
1616 12.05 1001.60
1617 15.56 998.72
1618 22.09 994.24
1619 22.78 994.72
1620 20.06 994.48
1621 22.61 993.61
1622 22.52 994.06
1623 19.23 990.65
1624 10.72 990.41
1625 9.12 989.76
1626 11.11 988.98
1627 13.59 990.97
1628 14.74 989.50
1629 13.55 983.40
1630 14.71 981.84
1631 13.96 976.58
1632 12.89 977.04
1633 15.15 984.42
1634 13.18 984.99
1635 14.50 985.38
1636 12.42 990.08
1637 14.62 993.73
1638 16.72 997.67
1639 18.70 1002.70
1640 21.05 1001.90
1641 20.67 998.33
1642 22.27 994.55
1643 21.76 995.40
1644 17.36 996.25
1645 11.98 997.10
1646 14.81 997.95
1647 18.31 993.62
1648 19.96 992.38
1649 21.72 994.26
1650 21.67 995.10
1651 20.39 996.29
1652 18.84 995.44
1653 15.67 988.48
1654 14.04 992.33
1655 13.17 997.93
1656 14.04 993.32
1657 15.17 985.38
1658 15.71 986.95
1659 18.74 989.02
1660 18.34 988.31
1661 18.03 991.22
1662 18.72 988.16
1663 23.52 986.79
1664 22.65 985.82
1665 19.24 988.95
1666 17.35 995.65
1667 18.82 995.25
1668 21.34 997.55
1669 21.37 995.88
1670 21.00 991.36
1671 17.54 992.02
1672 16.35 993.50
1673 11.56 998.01
1674 11.73 1003.00
1675 14.93 1003.00
1676 15.68 998.51
1677 17.07 994.25
1678 15.82 987.02
1679 18.50 981.73
1680 16.67 975.49
1681 14.31 977.91
1682 11.98 981.27
1683 10.90 985.01
1684 11.99 991.47
1685 12.53 996.84
1686 13.87 999.80
1687 15.88 998.41
1688 17.40 994.44
1689 16.89 993.21
1690 13.77 991.55
1691 14.27 991.21
1692 12.47 991.40
1693 13.52 995.99
1694 15.52 996.19
1695 15.06 997.95
1696 15.10 998.70
1697 14.21 999.45
1698 17.91 1000.20
1699 21.20 996.67
1700 18.52 988.84
1701 13.69 986.23
1702 12.93 981.40
1703 11.70 984.03
1704 12.30 986.66
1705 12.78 989.30
1706 12.37 994.52
1707 12.63 999.53
1708 15.40 998.60
1709 13.85 991.00
1710 13.32 982.69
1711 13.39 975.96
1712 12.13 979.93
1713 10.01 983.91
1714 11.60 990.50
1715 12.61 983.89
1716 13.04 969.75
1717 12.24 961.43
1718 12.65 970.90
1719 11.06 983.91
1720 10.16 992.19
1721 7.65 998.14
1722 10.12 997.65
1723 12.11 991.38
1724 11.84 991.24
1725 10.55 980.74
1726 9.12 974.47
1727 6.55 983.85
1728 6.75 996.32
1729 6.91 999.10
1730 11.16 993.87
1731 8.99 994.01
1732 9.42 995.23
1733 14.11 993.61
1734 7.03 1004.30
1735 7.06 999.28
1736 6.71 989.29
1737 7.22 977.51
1738 9.27 973.21
1739 9.51 968.91
1740 8.39 963.86
1741 6.26 978.04
1742 3.10 989.54
1743 6.60 977.31
1744 5.70 967.31
1745 3.61 974.77
1746 4.27 994.04
1747 1.86 1008.80
1748 3.60 1007.50
1749 6.02 1001.10
1750 6.24 994.75
1751 7.65 984.25
1752 5.80 973.82
1753 5.64 979.11
1754 3.69 988.50
1755 5.02 991.76
1756 3.19 1002.90
1757 5.54 1007.10
1758 5.89 1009.00
1759 4.80 1010.70
1760 4.03 1008.50
1761 6.31 1002.80
1762 6.16 996.16
1763 6.60 988.96
1764 7.18 987.31
1765 5.56 993.46
1766 9.23 992.69
1767 7.45 996.83
1768 6.91 1000.30
1769 7.33 1004.90
1770 5.83 1007.50
1771 5.65 1003.30
1772 5.71 1001.20
1773 -0.20 1009.30
1774 0.35 1012.30
1775 4.08 1014.10
1776 1.73 1017.80
1777 2.83 1007.00
1778 3.23 994.99
1779 -1.62 1000.70
1780 1.80 995.86
1781 3.39 991.10
1782 3.40 988.62
1783 1.04 988.00
1784 -7.12 1003.30
1785 -0.84 999.09
1786 0.35 1003.80
1787 1.90 1002.90
1788 3.98 990.42
1789 4.36 981.79
1790 2.95 969.90
1791 0.70 957.02
1792 -0.04 969.32
1793 -0.66 988.88
1794 4.41 982.19
1795 2.53 986.46
1796 2.81 971.90
1797 0.24 971.16
1798 1.85 955.12
1799 -0.82 954.49
1800 -1.07 959.91
1801 -1.50 973.03
1802 0.10 980.90
1803 -0.91 977.58
1804 0.16 975.28
1805 -0.69 972.98
1806 -2.15 984.21
1807 0.69 977.20
1808 1.76 974.87
1809 1.63 973.48
1810 1.71 975.27
1811 0.07 973.26
1812 0.95 968.57
1813 0.68 969.64
1814 0.09 980.43
1815 -0.50 989.69
1816 -1.23 993.49
1817 0.19 987.06
1818 1.15 979.67
1819 -0.45 980.42
1820 3.13 970.20
1821 2.89 973.36
1822 -0.76 987.92
1823 1.80 966.86
1824 -0.38 965.45
1825 -0.38 979.85
1826 5.29 974.44
1827 5.29 982.22
1828 5.29 986.03
1829 5.29 991.27
1830 5.29 993.72
1831 5.29 988.81
1832 5.29 980.39
1833 5.29 989.03
1834 5.29 981.60
1835 5.29 978.84
1836 5.29 985.61
1837 5.29 983.30
1838 5.29 975.19
1839 5.29 983.53
1840 5.29 996.61
1841 5.29 996.40
1842 5.29 983.91
1843 5.29 988.85
1844 5.29 991.79
1845 5.29 1001.10
1846 5.29 1004.30
1847 5.29 995.77
1848 5.29 997.07
1849 5.29 983.21
1850 5.29 978.79
1851 5.29 989.63
1852 5.29 990.84
1853 5.29 982.81
1854 5.29 974.79
1855 5.29 982.31
1856 5.29 983.32
1857 5.29 980.81
1858 5.29 978.60
1859 5.29 974.74
1860 5.29 967.00
1861 5.29 964.65
1862 5.29 974.61
1863 5.29 980.69
1864 5.29 966.31
1865 5.29 983.16
1866 5.29 996.29
1867 5.29 991.72
1868 5.29 995.18
1869 5.29 998.63
1870 5.29 1002.10
1871 5.29 1005.50
1872 5.29 1004.90
1873 5.29 1010.70
1874 5.29 1011.40
1875 5.29 1008.50
1876 5.29 1007.80
1877 5.29 1014.40
1878 5.29 1012.80
1879 5.29 1013.10
1880 5.29 1013.50
1881 5.29 1009.00
1882 5.29 1001.50
1883 5.29 1006.30
1884 5.29 1010.30
1885 -6.26 1013.40
1886 -1.45 1011.30
1887 0.32 1008.20
1888 -0.29 1005.20
1889 -0.94 1002.10
1890 -4.58 999.10
1891 -5.37 996.05
1892 -2.13 993.00
1893 -0.40 982.07
1894 0.40 974.84
1895 -0.60 966.29
1896 -3.14 978.57
1897 -3.96 989.56
1898 -1.60 994.16
1899 -6.22 1011.10
1900 -9.57 1018.40
1901 -6.64 1013.40
1902 -0.41 1002.50
1903 -1.95 996.70
1904 -3.40 998.84
1905 -1.00 992.10
1906 4.54 984.42
1907 0.25 986.59
1908 -3.59 980.67
1909 -7.89 978.54
1910 -6.54 981.44
1911 -3.79 978.96
1912 -2.78 973.77
1913 -7.13 981.05
1914 -6.86 989.91
1915 -4.83 999.36
1916 -1.20 994.44
1917 1.34 993.38
1918 3.00 990.05
1919 2.94 984.15
1920 3.14 987.43
1921 2.33 979.83
1922 1.49 972.23
1923 1.51 969.93
1924 2.54 981.17
1925 3.11 991.30
1926 0.97 989.97
1927 2.09 987.13
1928 3.02 988.74
1929 3.29 992.66
1930 4.40 991.75
1931 6.76 988.02
1932 7.92 986.99
1933 6.00 991.56
1934 3.33 1001.20
1935 2.51 998.10
1936 6.14 997.14
1937 7.67 1000.40
1938 7.88 1004.00
1939 10.24 1002.70
1940 11.94 1002.40
1941 10.14 1000.50
1942 8.49 1005.30
1943 5.87 1005.90
1944 5.69 1003.70
1945 4.22 1002.70
1946 2.36 1002.20
1947 2.00 998.97
1948 3.36 996.75
1949 4.10 996.33
1950 6.17 996.48
1951 6.47 1003.00
1952 7.37 1010.90
1953 10.30 1015.90
1954 12.31 1012.90
1955 13.19 1008.40
1956 13.97 1002.60
1957 11.48 995.16
1958 9.82 994.54
1959 9.32 994.69
1960 10.17 994.41
1961 8.98 988.45
1962 8.51 983.59
1963 9.21 983.24
1964 9.01 988.23
1965 12.43 992.17
1966 9.75 994.76
1967 12.92 998.57
1968 10.46 990.97
1969 11.58 988.23
1970 9.29 984.48
1971 9.01 989.94
1972 7.61 990.55
1973 11.00 984.68
1974 8.75 987.18
1975 9.53 988.66
1976 16.47 998.41
1977 20.48 996.81
1978 14.26 1000.50
1979 14.24 1004.20
1980 15.78 1000.90
1981 12.05 1001.60
1982 15.56 998.72
1983 22.09 994.24
1984 22.78 994.72
1985 20.06 994.48
1986 22.61 993.61
1987 22.52 994.06
1988 19.23 990.65
1989 10.72 990.41
1990 9.12 989.76
1991 11.11 988.98
1992 13.59 990.97
1993 14.74 989.50
1994 13.55 983.40
1995 14.71 981.84
1996 13.96 976.58
1997 12.89 977.04
1998 15.15 984.42
1999 13.18 984.99
2000 14.50 985.38
2001 12.42 990.08
2002 14.62 993.73
2003 16.72 997.67
2004 18.70 1002.70
2005 21.05 1001.90
2006 20.67 998.33
2007 22.27 994.55
2008 21.76 995.40
2009 17.36 996.25
2010 11.98 997.10
2011 14.81 997.95
2012 18.31 993.62
2013 19.96 992.38
2014 21.72 994.26
2015 21.67 995.10
2016 20.39 996.29
2017 18.84 995.44
2018 15.67 988.48
2019 14.04 992.33
2020 13.17 997.93
2021 14.04 993.32
2022 15.17 985.38
2023 15.71 986.95
2024 18.74 989.02
2025 18.34 988.31
2026 18.03 991.22
2027 18.72 988.16
2028 23.52 986.79
2029 22.65 985.82
2030 19.24 988.95
2031 17.35 995.65
2032 18.82 995.25
2033 21.34 997.55
2034 21.37 995.88
2035 21.00 991.36
2036 17.54 992.02
2037 16.35 993.50
2038 11.56 998.01
2039 11.73 1003.00
2040 14.93 1003.00
2041 15.68 998.51
2042 17.07 994.25
2043 15.82 987.02
2044 18.50 981.73
2045 16.67 975.49
2046 14.31 977.91
2047 11.98 981.27
2048 10.90 985.01
2049 11.99 991.47
2050 12.53 996.84
2051 13.87 999.80
2052 15.88 998.41
2053 17.40 994.44
2054 16.89 993.21
2055 13.77 991.55
2056 14.27 991.21
2057 12.47 991.40
2058 13.52 995.99
2059 15.52 996.19
2060 15.06 997.95
2061 15.10 998.70
2062 14.21 999.45
2063 17.91 1000.20
2064 21.20 996.67
2065 18.52 988.84
2066 13.69 986.23
2067 12.93 981.40
2068 11.70 984.03
2069 12.30 986.66
2070 12.78 989.30
2071 12.37 994.52
2072 12.63 999.53
2073 15.40 998.60
2074 13.85 991.00
2075 13.32 982.69
2076 13.39 975.96
2077 12.13 979.93
2078 10.01 983.91
2079 11.60 990.50
2080 12.61 983.89
2081 13.04 969.75
2082 12.24 961.43
2083 12.65 970.90
2084 11.06 983.91
2085 10.16 992.19
2086 7.65 998.14
2087 10.12 997.65
2088 12.11 991.38
2089 11.84 991.24
2090 10.55 980.74
2091 9.12 974.47
2092 6.55 983.85
2093 6.75 996.32
2094 6.91 999.10
2095 11.16 993.87
2096 8.99 994.01
2097 9.42 995.23
2098 14.11 993.61
2099 7.03 1004.30
2100 7.06 999.28
2101 6.71 989.29
2102 7.22 977.51
2103 9.27 973.21
2104 9.51 968.91
2105 8.39 963.86
2106 6.26 978.04
2107 3.10 989.54
2108 6.60 977.31
2109 5.70 967.31
2110 3.61 974.77
2111 4.27 994.04
2112 1.86 1008.80
2113 3.60 1007.50
2114 6.02 1001.10
2115 6.24 994.75
2116 7.65 984.25
2117 5.80 973.82
2118 5.64 979.11
2119 3.69 988.50
2120 5.02 991.76
2121 3.19 1002.90
2122 5.54 1007.10
2123 5.89 1009.00
2124 4.80 1010.70
2125 4.03 1008.50
2126 6.31 1002.80
2127 6.16 996.16
2128 6.60 988.96
2129 7.18 987.31
2130 5.56 993.46
2131 9.23 992.69
2132 7.45 996.83
2133 6.91 1000.30
2134 7.33 1004.90
2135 5.83 1007.50
2136 5.65 1003.30
2137 5.71 1001.20
2138 -0.20 1009.30
2139 0.35 1012.30
2140 4.08 1014.10
2141 1.73 1017.80
2142 2.83 1007.00
2143 3.23 994.99
2144 -1.62 1000.70
2145 1.80 995.86
2146 3.39 991.10
2147 3.40 988.62
2148 1.04 988.00
2149 -7.12 1003.30
2150 -0.84 999.09
2151 0.35 1003.80
2152 1.90 1002.90
2153 3.98 990.42
2154 4.36 981.79
2155 2.95 969.90
2156 0.70 957.02
2157 -0.04 969.32
2158 -0.66 988.88
2159 4.41 982.19
2160 2.53 986.46
2161 2.81 971.90
2162 0.24 971.16
2163 1.85 955.12
2164 -0.82 954.49
2165 -1.07 959.91
2166 -1.50 973.03
2167 0.10 980.90
2168 -0.91 977.58
2169 0.16 975.28
2170 -0.69 972.98
2171 -2.15 984.21
2172 0.69 977.20
2173 1.76 974.87
2174 1.63 973.48
2175 1.71 975.27
2176 0.07 973.26
2177 0.95 968.57
2178 0.68 969.64
2179 0.09 980.43
2180 -0.50 989.69
2181 -1.23 993.49
2182 0.19 987.06
2183 1.15 979.67
2184 -0.45 980.42
2185 3.13 970.20
2186 2.89 973.36
2187 -0.76 987.92
2188 1.80 966.86
2189 -0.38 965.45
2190 -0.38 979.85
2191 5.29 974.44
2192 5.29 982.22
2193 5.29 986.03
2194 5.29 991.27
2195 5.29 993.72
2196 5.29 988.81
2197 5.29 980.39
2198 5.29 989.03
2199 5.29 981.60
2200 5.29 978.84
2201 5.29 985.61
2202 5.29 983.30
2203 5.29 975.19
2204 5.29 983.53
2205 5.29 996.61
2206 5.29 996.40
2207 5.29 983.91
2208 5.29 988.85
2209 5.29 991.79
2210 5.29 1001.10
2211 5.29 1004.30
2212 5.29 995.77
2213 5.29 997.07
2214 5.29 983.21
2215 5.29 978.79
2216 5.29 989.63
2217 5.29 990.84
2218 5.29 982.81
2219 5.29 974.79
2220 5.29 982.31
2221 5.29 983.32
2222 5.29 980.81
2223 5.29 978.60
2224 5.29 974.74
2225 5.29 967.00
2226 5.29 964.65
2227 5.29 974.61
2228 5.29 980.69
2229 5.29 966.31
2230 5.29 983.16
2231 5.29 996.29
2232 5.29 991.72
2233 5.29 995.18
2234 5.29 998.63
2235 5.29 1002.10
2236 5.29 1005.50
2237 5.29 1004.90
2238 5.29 1010.70
2239 5.29 1011.40
2240 5.29 1008.50
2241 5.29 1007.80
2242 5.29 1014.40
2243 5.29 1012.80
2244 5.29 1013.10
2245 5.29 1013.50
2246 5.29 1009.00
2247 5.29 1001.50
2248 5.29 1006.30
2249 5.29 1010.30
2250 -6.26 1013.40
2251 -1.45 1011.30
2252 0.32 1008.20
2253 -0.29 1005.20
2254 -0.94 1002.10
2255 -4.58 999.10
2256 -5.37 996.05
2257 -2.13 993.00
2258 -0.40 982.07
2259 0.40 974.84
2260 -0.60 966.29
2261 -3.14 978.57
2262 -3.96 989.56
2263 -1.60 994.16
2264 -6.22 1011.10
2265 -9.57 1018.40
2266 -6.64 1013.40
2267 -0.41 1002.50
2268 -1.95 996.70
2269 -3.40 998.84
2270 -1.00 992.10
2271 4.54 984.42
2272 0.25 986.59
2273 -3.59 980.67
2274 -7.89 978.54
2275 -6.54 981.44
2276 -3.79 978.96
2277 -2.78 973.77
2278 -7.13 981.05
2279 -6.86 989.91
2280 -4.83 999.36
2281 -1.20 994.44
2282 1.34 993.38
2283 3.00 990.05
2284 2.94 984.15
2285 3.14 987.43
2286 2.33 979.83
2287 1.49 972.23
2288 1.51 969.93
2289 2.54 981.17
2290 3.11 991.30
2291 0.97 989.97
2292 2.09 987.13
2293 3.02 988.74
2294 3.29 992.66
2295 4.40 991.75
2296 6.76 988.02
2297 7.92 986.99
2298 6.00 991.56
2299 3.33 1001.20
2300 2.51 998.10
2301 6.14 997.14
2302 7.67 1000.40
2303 7.88 1004.00
2304 10.24 1002.70
2305 11.94 1002.40
2306 10.14 1000.50
2307 8.49 1005.30
2308 5.87 1005.90
2309 5.69 1003.70
2310 4.22 1002.70
2311 2.36 1002.20
2312 2.00 998.97
2313 3.36 996.75
2314 4.10 996.33
2315 6.17 996.48
2316 6.47 1003.00
2317 7.37 1010.90
2318 10.30 1015.90
2319 12.31 1012.90
2320 13.19 1008.40
2321 13.97 1002.60
2322 11.48 995.16
2323 9.82 994.54
2324 9.32 994.69
2325 10.17 994.41
2326 8.98 988.45
2327 8.51 983.59
2328 9.21 983.24
2329 9.01 988.23
2330 12.43 992.17
2331 9.75 994.76
2332 12.92 998.57
2333 10.46 990.97
2334 11.58 988.23
2335 9.29 984.48
2336 9.01 989.94
2337 7.61 990.55
2338 11.00 984.68
2339 8.75 987.18
2340 9.53 988.66
2341 16.47 998.41
2342 20.48 996.81
2343 14.26 1000.50
2344 14.24 1004.20
2345 15.78 1000.90
2346 12.05 1001.60
2347 15.56 998.72
2348 22.09 994.24
2349 22.78 994.72
2350 20.06 994.48
2351 22.61 993.61
2352 22.52 994.06
2353 19.23 990.65
2354 10.72 990.41
2355 9.12 989.76
2356 11.11 988.98
2357 13.59 990.97
2358 14.74 989.50
2359 13.55 983.40
2360 14.71 981.84
2361 13.96 976.58
2362 12.89 977.04
2363 15.15 984.42
2364 13.18 984.99
2365 14.50 985.38
2366 12.42 990.08
2367 14.62 993.73
2368 16.72 997.67
2369 18.70 1002.70
2370 21.05 1001.90
2371 20.67 998.33
2372 22.27 994.55
2373 21.76 995.40
2374 17.36 996.25
2375 11.98 997.10
2376 14.81 997.95
2377 18.31 993.62
2378 19.96 992.38
2379 21.72 994.26
2380 21.67 995.10
2381 20.39 996.29
2382 18.84 995.44
2383 15.67 988.48
2384 14.04 992.33
2385 13.17 997.93
2386 14.04 993.32
2387 15.17 985.38
2388 15.71 986.95
2389 18.74 989.02
2390 18.34 988.31
2391 18.03 991.22
2392 18.72 988.16
2393 23.52 986.79
2394 22.65 985.82
2395 19.24 988.95
2396 17.35 995.65
2397 18.82 995.25
2398 21.34 997.55
2399 21.37 995.88
2400 21.00 991.36
2401 17.54 992.02
2402 16.35 993.50
2403 11.56 998.01
2404 11.73 1003.00
2405 14.93 1003.00
2406 15.68 998.51
2407 17.07 994.25
2408 15.82 987.02
2409 18.50 981.73
2410 16.67 975.49
2411 14.31 977.91
2412 11.98 981.27
2413 10.90 985.01
2414 11.99 991.47
2415 12.53 996.84
2416 13.87 999.80
2417 15.88 998.41
2418 17.40 994.44
2419 16.89 993.21
2420 13.77 991.55
2421 14.27 991.21
2422 12.47 991.40
2423 13.52 995.99
2424 15.52 996.19
2425 15.06 997.95
2426 15.10 998.70
2427 14.21 999.45
2428 17.91 1000.20
2429 21.20 996.67
2430 18.52 988.84
2431 13.69 986.23
2432 12.93 981.40
2433 11.70 984.03
2434 12.30 986.66
2435 12.78 989.30
2436 12.37 994.52
2437 12.63 999.53
2438 15.40 998.60
2439 13.85 991.00
2440 13.32 982.69
2441 13.39 975.96
2442 12.13 979.93
2443 10.01 983.91
2444 11.60 990.50
2445 12.61 983.89
2446 13.04 969.75
2447 12.24 961.43
2448 12.65 970.90
2449 11.06 983.91
2450 10.16 992.19
2451 7.65 998.14
2452 10.12 997.65
2453 12.11 991.38
2454 11.84 991.24
2455 10.55 980.74
2456 9.12 974.47
2457 6.55 983.85
2458 6.75 996.32
2459 6.91 999.10
2460 11.16 993.87
2461 8.99 994.01
2462 9.42 995.23
2463 14.11 993.61
2464 7.03 1004.30
2465 7.06 999.28
2466 6.71 989.29
2467 7.22 977.51
2468 9.27 973.21
2469 9.51 968.91
2470 8.39 963.86
2471 6.26 978.04
2472 3.10 989.54
2473 6.60 977.31
2474 5.70 967.31
2475 3.61 974.77
2476 4.27 994.04
2477 1.86 1008.80
2478 3.60 1007.50
2479 6.02 1001.10
2480 6.24 994.75
2481 7.65 984.25
2482 5.80 973.82
2483 5.64 979.11
2484 3.69 988.50
2485 5.02 991.76
2486 3.19 1002.90
2487 5.54 1007.10
2488 5.89 1009.00
2489 4.80 1010.70
2490 4.03 1008.50
2491 6.31 1002.80
2492 6.16 996.16
2493 6.60 988.96
2494 7.18 987.31
2495 5.56 993.46
2496 9.23 992.69
2497 7.45 996.83
2498 6.91 1000.30
2499 7.33 1004.90
2500 5.83 1007.50
2501 5.65 1003.30
2502 5.71 1001.20
2503 -0.20 1009.30
2504 0.35 1012.30
2505 4.08 1014.10
2506 1.73 1017.80
2507 2.83 1007.00
2508 3.23 994.99
2509 -1.62 1000.70
2510 1.80 995.86
2511 3.39 991.10
2512 3.40 988.62
2513 1.04 988.00
2514 -7.12 1003.30
2515 -0.84 999.09
2516 0.35 1003.80
2517 1.90 1002.90
2518 3.98 990.42
2519 4.36 981.79
2520 2.95 969.90
2521 0.70 957.02
2522 -0.04 969.32
2523 -0.66 988.88
2524 4.41 982.19
2525 2.53 986.46
2526 2.81 971.90
2527 0.24 971.16
2528 1.85 955.12
2529 -0.82 954.49
2530 -1.07 959.91
2531 -1.50 973.03
2532 0.10 980.90
2533 -0.91 977.58
2534 0.16 975.28
2535 -0.69 972.98
2536 -2.15 984.21
2537 0.69 977.20
2538 1.76 974.87
2539 1.63 973.48
2540 1.71 975.27
2541 0.07 973.26
2542 0.95 968.57
2543 0.68 969.64
2544 0.09 980.43
2545 -0.50 989.69
2546 -1.23 993.49
2547 0.19 987.06
2548 1.15 979.67
2549 -0.45 980.42
2550 3.13 970.20
2551 2.89 973.36
2552 -0.76 987.92
2553 1.80 966.86
2554 -0.38 965.45
2555 -0.38 979.85
2556 5.29 974.44
2557 5.29 982.22
2558 5.29 986.03
2559 5.29 991.27
2560 5.29 993.72
2561 5.29 988.81
2562 5.29 980.39
2563 5.29 989.03
2564 5.29 981.60
2565 5.29 978.84
2566 5.29 985.61
2567 5.29 983.30
2568 5.29 975.19
2569 5.29 983.53
2570 5.29 996.61
2571 5.29 996.40
2572 5.29 983.91
2573 5.29 988.85
2574 5.29 991.79
2575 5.29 1001.10
2576 5.29 1004.30
2577 5.29 995.77
2578 5.29 997.07
2579 5.29 983.21
2580 5.29 978.79
2581 5.29 989.63
2582 5.29 990.84
2583 5.29 982.81
2584 5.29 974.79
2585 5.29 982.31
2586 5.29 983.32
2587 5.29 980.81
2588 5.29 978.60
2589 5.29 974.74
2590 5.29 967.00
2591 5.29 964.65
2592 5.29 974.61
2593 5.29 980.69
2594 5.29 966.31
2595 5.29 983.16
2596 5.29 996.29
2597 5.29 991.72
2598 5.29 995.18
2599 5.29 998.63
2600 5.29 1002.10
2601 5.29 1005.50
2602 5.29 1004.90
2603 5.29 1010.70
2604 5.29 1011.40
2605 5.29 1008.50
2606 5.29 1007.80
2607 5.29 1014.40
2608 5.29 1012.80
2609 5.29 1013.10
2610 5.29 1013.50
2611 5.29 1009.00
2612 5.29 1001.50
2613 5.29 1006.30
2614 5.29 1010.30
2615 -6.26 1013.40
2616 -1.45 1011.30
2617 0.32 1008.20
2618 -0.29 1005.20
2619 -0.94 1002.10
2620 -4.58 999.10
2621 -5.37 996.05
2622 -2.13 993.00
2623 -0.40 982.07
2624 0.40 974.84
2625 -0.60 966.29
2626 -3.14 978.57
2627 -3.96 989.56
2628 -1.60 994.16
2629 -6.22 1011.10
2630 -9.57 1018.40
2631 -6.64 1013.40
2632 -0.41 1002.50
2633 -1.95 996.70
2634 -3.40 998.84
2635 -1.00 992.10
2636 4.54 984.42
2637 0.25 986.59
2638 -3.59 980.67
2639 -7.89 978.54
2640 -6.54 981.44
2641 -3.79 978.96
2642 -2.78 973.77
2643 -7.13 981.05
2644 -6.86 989.91
2645 -4.83 999.36
2646 -1.20 994.44
2647 1.34 993.38
2648 3.00 990.05
2649 2.94 984.15
2650 3.14 987.43
2651 2.33 979.83
2652 1.49 972.23
2653 1.51 969.93
2654 2.54 981.17
2655 3.11 991.30
2656 0.97 989.97
2657 2.09 987.13
2658 3.02 988.74
2659 3.29 992.66
2660 4.40 991.75
2661 6.76 988.02
2662 7.92 986.99
2663 6.00 991.56
2664 3.33 1001.20
2665 2.51 998.10
2666 6.14 997.14
2667 7.67 1000.40
2668 7.88 1004.00
2669 10.24 1002.70
2670 11.94 1002.40
2671 10.14 1000.50
2672 8.49 1005.30
2673 5.87 1005.90
2674 5.69 1003.70
2675 4.22 1002.70
2676 2.36 1002.20
2677 2.00 998.97
2678 3.36 996.75
2679 4.10 996.33
2680 6.17 996.48
2681 6.47 1003.00
2682 7.37 1010.90
2683 10.30 1015.90
2684 12.31 1012.90
2685 13.19 1008.40
2686 13.97 1002.60
2687 11.48 995.16
2688 9.82 994.54
2689 9.32 994.69
2690 10.17 994.41
2691 8.98 988.45
2692 8.51 983.59
2693 9.21 983.24
2694 9.01 988.23
2695 12.43 992.17
2696 9.75 994.76
2697 12.92 998.57
2698 10.46 990.97
2699 11.58 988.23
2700 9.29 984.48
2701 9.01 989.94
2702 7.61 990.55
2703 11.00 984.68
2704 8.75 987.18
2705 9.53 988.66
2706 16.47 998.41
2707 20.48 996.81
2708 14.26 1000.50
2709 14.24 1004.20
2710 15.78 1000.90
2711 12.05 1001.60
2712 15.56 998.72
2713 22.09 994.24
2714 22.78 994.72
2715 20.06 994.48
2716 22.61 993.61
2717 22.52 994.06
2718 19.23 990.65
2719 10.72 990.41
2720 9.12 989.76
2721 11.11 988.98
2722 13.59 990.97
2723 14.74 989.50
2724 13.55 983.40
2725 14.71 981.84
2726 13.96 976.58
2727 12.89 977.04
2728 15.15 984.42
2729 13.18 984.99
2730 14.50 985.38
2731 12.42 990.08
2732 14.62 993.73
2733 16.72 997.67
2734 18.70 1002.70
2735 21.05 1001.90
2736 20.67 998.33
2737 22.27 994.55
2738 21.76 995.40
2739 17.36 996.25
2740 11.98 997.10
2741 14.81 997.95
2742 18.31 993.62
2743 19.96 992.38
2744 21.72 994.26
2745 21.67 995.10
2746 20.39 996.29
2747 18.84 995.44
2748 15.67 988.48
2749 14.04 992.33
2750 13.17 997.93
2751 14.04 993.32
2752 15.17 985.38
2753 15.71 986.95
2754 18.74 989.02
2755 18.34 988.31
2756 18.03 991.22
2757 18.72 988.16
2758 23.52 986.79
2759 22.65 985.82
2760 19.24 988.95
2761 17.35 995.65
2762 18.82 995.25
2763 21.34 997.55
2764 21.37 995.88
2765 21.00 991.36
2766 17.54 992.02
2767 16.35 993.50
2768 11.56 998.01
2769 11.73 1003.00
2770 14.93 1003.00
2771 15.68 998.51
2772 17.07 994.25
2773 15.82 987.02
2774 18.50 981.73
2775 16.67 975.49
2776 14.31 977.91
2777 11.98 981.27
2778 10.90 985.01
2779 11.99 991.47
2780 12.53 996.84
2781 13.87 999.80
2782 15.88 998.41
2783 17.40 994.44
2784 16.89 993.21
2785 13.77 991.55
2786 14.27 991.21
2787 12.47 991.40
2788 13.52 995.99
2789 15.52 996.19
2790 15.06 997.95
2791 15.10 998.70
2792 14.21 999.45
2793 17.91 1000.20
2794 21.20 996.67
2795 18.52 988.84
2796 13.69 986.23
2797 12.93 981.40
2798 11.70 984.03
2799 12.30 986.66
2800 12.78 989.30
2801 12.37 994.52
2802 12.63 999.53
2803 15.40 998.60
2804 13.85 991.00
2805 13.32 982.69
2806 13.39 975.96
2807 12.13 979.93
2808 10.01 983.91
2809 11.60 990.50
2810 12.61 983.89
2811 13.04 969.75
2812 12.24 961.43
2813 12.65 970.90
2814 11.06 983.91
2815 10.16 992.19
2816 7.65 998.14
2817 10.12 997.65
2818 12.11 991.38
2819 11.84 991.24
2820 10.55 980.74
2821 9.12 974.47
2822 6.55 983.85
2823 6.75 996.32
2824 6.91 999.10
2825 11.16 993.87
2826 8.99 994.01
2827 9.42 995.23
2828 14.11 993.61
2829 7.03 1004.30
2830 7.06 999.28
2831 6.71 989.29
2832 7.22 977.51
2833 9.27 973.21
2834 9.51 968.91
2835 8.39 963.86
2836 6.26 978.04
2837 3.10 989.54
2838 6.60 977.31
2839 5.70 967.31
2840 3.61 974.77
2841 4.27 994.04
2842 1.86 1008.80
2843 3.60 1007.50
2844 6.02 1001.10
2845 6.24 994.75
2846 7.65 984.25
2847 5.80 973.82
2848 5.64 979.11
2849 3.69 988.50
2850 5.02 991.76
2851 3.19 1002.90
2852 5.54 1007.10
2853 5.89 1009.00
2854 4.80 1010.70
2855 4.03 1008.50
2856 6.31 1002.80
2857 6.16 996.16
2858 6.60 988.96
2859 7.18 987.31
2860 5.56 993.46
2861 9.23 992.69
2862 7.45 996.83
2863 6.91 1000.30
2864 7.33 1004.90
2865 5.83 1007.50
2866 5.65 1003.30
2867 5.71 1001.20
2868 -0.20 1009.30
2869 0.35 1012.30
2870 4.08 1014.10
2871 1.73 1017.80
2872 2.83 1007.00
2873 3.23 994.99
2874 -1.62 1000.70
2875 1.80 995.86
2876 3.39 991.10
2877 3.40 988.62
2878 1.04 988.00
2879 -7.12 1003.30
2880 -0.84 999.09
2881 0.35 1003.80
2882 1.90 1002.90
2883 3.98 990.42
2884 4.36 981.79
2885 2.95 969.90
2886 0.70 957.02
2887 -0.04 969.32
2888 -0.66 988.88
2889 4.41 982.19
2890 2.53 986.46
2891 2.81 971.90
2892 0.24 971.16
2893 1.85 955.12
2894 -0.82 954.49
2895 -1.07 959.91
2896 -1.50 973.03
2897 0.10 980.90
2898 -0.91 977.58
2899 0.16 975.28
2900 -0.69 972.98
2901 -2.15 984.21
2902 0.69 977.20
2903 1.76 974.87
2904 1.63 973.48
2905 1.71 975.27
2906 0.07 973.26
2907 0.95 968.57
2908 0.68 969.64
2909 0.09 980.43
2910 -0.50 989.69
2911 -1.23 993.49
2912 0.19 987.06
2913 1.15 979.67
2914 -0.45 980.42
2915 3.13 970.20
2916 2.89 973.36
2917 -0.76 987.92
2918 1.80 966.86
2919 -0.38 965.45
2920 -0.38 979.85
2921 5.29 974.44
2922 5.29 982.22
2923 5.29 986.03
2924 5.29 991.27
2925 5.29 993.72
2926 5.29 988.81
2927 5.29 980.39
2928 5.29 989.03
2929 5.29 981.60
2930 5.29 978.84
2931 5.29 985.61
2932 5.29 983.30
2933 5.29 975.19
2934 5.29 983.53
2935 5.29 996.61
2936 5.29 996.40
2937 5.29 983.91
2938 5.29 988.85
2939 5.29 991.79
2940 5.29 1001.10
2941 5.29 1004.30
2942 5.29 995.77
2943 5.29 997.07
2944 5.29 983.21
2945 5.29 978.79
2946 5.29 989.63
2947 5.29 990.84
2948 5.29 982.81
2949 5.29 974.79
2950 5.29 982.31
2951 5.29 983.32
2952 5.29 980.81
2953 5.29 978.60
2954 5.29 974.74
2955 5.29 967.00
2956 5.29 964.65
2957 5.29 974.61
2958 5.29 980.69
2959 5.29 966.31
2960 5.29 983.16
2961 5.29 996.29
2962 5.29 991.72
2963 5.29 995.18
2964 5.29 998.63
2965 5.29 1002.10
2966 5.29 1005.50
2967 5.29 1004.90
2968 5.29 1010.70
2969 5.29 1011.40
2970 5.29 1008.50
2971 5.29 1007.80
2972 5.29 1014.40
2973 5.29 1012.80
2974 5.29 1013.10
2975 5.29 1013.50
2976 5.29 1009.00
2977 5.29 1001.50
2978 5.29 1006.30
2979 5.29 1010.30
2980 -6.26 1013.40
2981 -1.45 1011.30
2982 0.32 1008.20
2983 -0.29 1005.20
2984 -0.94 1002.10
2985 -4.58 999.10
2986 -5.37 996.05
2987 -2.13 993.00
2988 -0.40 982.07
2989 0.40 974.84
2990 -0.60 966.29
2991 -3.14 978.57
2992 -3.96 989.56
2993 -1.60 994.16
2994 -6.22 1011.10
2995 -9.57 1018.40
2996 -6.64 1013.40
2997 -0.41 1002.50
2998 -1.95 996.70
2999 -3.40 998.84
3000 -1.00 992.10
3001 4.54 984.42
3002 0.25 986.59
3003 -3.59 980.67
3004 -7.89 978.54
3005 -6.54 981.44
3006 -3.79 978.96
3007 -2.78 973.77
3008 -7.13 981.05
3009 -6.86 989.91
3010 -4.83 999.36
3011 -1.20 994.44
3012 1.34 993.38
3013 3.00 990.05
3014 2.94 984.15
3015 3.14 987.43
3016 2.33 979.83
3017 1.49 972.23
3018 1.51 969.93
3019 2.54 981.17
3020 3.11 991.30
3021 0.97 989.97
3022 2.09 987.13
3023 3.02 988.74
3024 3.29 992.66
3025 4.40 991.75
3026 6.76 988.02
3027 7.92 986.99
3028 6.00 991.56
3029 3.33 1001.20
3030 2.51 998.10
3031 6.14 997.14
3032 7.67 1000.40
3033 7.88 1004.00
3034 10.24 1002.70
3035 11.94 1002.40
3036 10.14 1000.50
3037 8.49 1005.30
3038 5.87 1005.90
3039 5.69 1003.70
3040 4.22 1002.70
3041 2.36 1002.20
3042 2.00 998.97
3043 3.36 996.75
3044 4.10 996.33
3045 6.17 996.48
3046 6.47 1003.00
3047 7.37 1010.90
3048 10.30 1015.90
3049 12.31 1012.90
3050 13.19 1008.40
3051 13.97 1002.60
3052 11.48 995.16
3053 9.82 994.54
3054 9.32 994.69
3055 10.17 994.41
3056 8.98 988.45
3057 8.51 983.59
3058 9.21 983.24
3059 9.01 988.23
3060 12.43 992.17
3061 9.75 994.76
3062 12.92 998.57
3063 10.46 990.97
3064 11.58 988.23
3065 9.29 984.48
3066 9.01 989.94
3067 7.61 990.55
3068 11.00 984.68
3069 8.75 987.18
3070 9.53 988.66
3071 16.47 998.41
3072 20.48 996.81
3073 14.26 1000.50
3074 14.24 1004.20
3075 15.78 1000.90
3076 12.05 1001.60
3077 15.56 998.72
3078 22.09 994.24
3079 22.78 994.72
3080 20.06 994.48
3081 22.61 993.61
3082 22.52 994.06
3083 19.23 990.65
3084 10.72 990.41
3085 9.12 989.76
3086 11.11 988.98
3087 13.59 990.97
3088 14.74 989.50
3089 13.55 983.40
3090 14.71 981.84
3091 13.96 976.58
3092 12.89 977.04
3093 15.15 984.42
3094 13.18 984.99
3095 14.50 985.38
3096 12.42 990.08
3097 14.62 993.73
3098 16.72 997.67
3099 18.70 1002.70
3100 21.05 1001.90
3101 20.67 998.33
3102 22.27 994.55
3103 21.76 995.40
3104 17.36 996.25
3105 11.98 997.10
3106 14.81 997.95
3107 18.31 993.62
3108 19.96 992.38
3109 21.72 994.26
3110 21.67 995.10
3111 20.39 996.29
3112 18.84 995.44
3113 15.67 988.48
3114 14.04 992.33
3115 13.17 997.93
3116 14.04 993.32
3117 15.17 985.38
3118 15.71 986.95
3119 18.74 989.02
3120 18.34 988.31
3121 18.03 991.22
3122 18.72 988.16
3123 23.52 986.79
3124 22.65 985.82
3125 19.24 988.95
3126 17.35 995.65
3127 18.82 995.25
3128 21.34 997.55
3129 21.37 995.88
3130 21.00 991.36
3131 17.54 992.02
3132 16.35 993.50
3133 11.56 998.01
3134 11.73 1003.00
3135 14.93 1003.00
3136 15.68 998.51
3137 17.07 994.25
3138 15.82 987.02
3139 18.50 981.73
3140 16.67 975.49
3141 14.31 977.91
3142 11.98 981.27
3143 10.90 985.01
3144 11.99 991.47
3145 12.53 996.84
3146 13.87 999.80
3147 15.88 998.41
3148 17.40 994.44
3149 16.89 993.21
3150 13.77 991.55
3151 14.27 991.21
3152 12.47 991.40
3153 13.52 995.99
3154 15.52 996.19
3155 15.06 997.95
3156 15.10 998.70
3157 14.21 999.45
3158 17.91 1000.20
3159 21.20 996.67
3160 18.52 988.84
3161 13.69 986.23
3162 12.93 981.40
3163 11.70 984.03
3164 12.30 986.66
3165 12.78 989.30
3166 12.37 994.52
3167 12.63 999.53
3168 15.40 998.60
3169 13.85 991.00
3170 13.32 982.69
3171 13.39 975.96
3172 12.13 979.93
3173 10.01 983.91
3174 11.60 990.50
3175 12.61 983.89
3176 13.04 969.75
3177 12.24 961.43
3178 12.65 970.90
3179 11.06 983.91
3180 10.16 992.19
3181 7.65 998.14
3182 10.12 997.65
3183 12.11 991.38
3184 11.84 991.24
3185 10.55 980.74
3186 9.12 974.47
3187 6.55 983.85
3188 6.75 996.32
3189 6.91 999.10
3190 11.16 993.87
3191 8.99 994.01
3192 9.42 995.23
3193 14.11 993.61
3194 7.03 1004.30
3195 7.06 999.28
3196 6.71 989.29
3197 7.22 977.51
3198 9.27 973.21
3199 9.51 968.91
3200 8.39 963.86
3201 6.26 978.04
3202 3.10 989.54
3203 6.60 977.31
3204 5.70 967.31
3205 3.61 974.77
3206 4.27 994.04
3207 1.86 1008.80
3208 3.60 1007.50
3209 6.02 1001.10
3210 6.24 994.75
3211 7.65 984.25
3212 5.80 973.82
3213 5.64 979.11
3214 3.69 988.50
3215 5.02 991.76
3216 3.19 1002.90
3217 5.54 1007.10
3218 5.89 1009.00
3219 4.80 1010.70
3220 4.03 1008.50
3221 6.31 1002.80
3222 6.16 996.16
3223 6.60 988.96
3224 7.18 987.31
3225 5.56 993.46
3226 9.23 992.69
3227 7.45 996.83
3228 6.91 1000.30
3229 7.33 1004.90
3230 5.83 1007.50
3231 5.65 1003.30
3232 5.71 1001.20
3233 -0.20 1009.30
3234 0.35 1012.30
3235 4.08 1014.10
3236 1.73 1017.80
3237 2.83 1007.00
3238 3.23 994.99
3239 -1.62 1000.70
3240 1.80 995.86
3241 3.39 991.10
3242 3.40 988.62
3243 1.04 988.00
3244 -7.12 1003.30
3245 -0.84 999.09
3246 0.35 1003.80
3247 1.90 1002.90
3248 3.98 990.42
3249 4.36 981.79
3250 2.95 969.90
3251 0.70 957.02
3252 -0.04 969.32
3253 -0.66 988.88
3254 4.41 982.19
3255 2.53 986.46
3256 2.81 971.90
3257 0.24 971.16
3258 1.85 955.12
3259 -0.82 954.49
3260 -1.07 959.91
3261 -1.50 973.03
3262 0.10 980.90
3263 -0.91 977.58
3264 0.16 975.28
3265 -0.69 972.98
3266 -2.15 984.21
3267 0.69 977.20
3268 1.76 974.87
3269 1.63 973.48
3270 1.71 975.27
3271 0.07 973.26
3272 0.95 968.57
3273 0.68 969.64
3274 0.09 980.43
3275 -0.50 989.69
3276 -1.23 993.49
3277 0.19 987.06
3278 1.15 979.67
3279 -0.45 980.42
3280 3.13 970.20
3281 2.89 973.36
3282 -0.76 987.92
3283 1.80 966.86
3284 -0.38 965.45
3285 -0.38 979.85
3286 5.29 974.44
3287 5.29 982.22
3288 5.29 986.03
3289 5.29 991.27
3290 5.29 993.72
3291 5.29 988.81
3292 5.29 980.39
3293 5.29 989.03
3294 5.29 981.60
3295 5.29 978.84
3296 5.29 985.61
3297 5.29 983.30
3298 5.29 975.19
3299 5.29 983.53
3300 5.29 996.61
3301 5.29 996.40
3302 5.29 983.91
3303 5.29 988.85
3304 5.29 991.79
3305 5.29 1001.10
3306 5.29 1004.30
3307 5.29 995.77
3308 5.29 997.07
3309 5.29 983.21
3310 5.29 978.79
3311 5.29 989.63
3312 5.29 990.84
3313 5.29 982.81
3314 5.29 974.79
3315 5.29 982.31
3316 5.29 983.32
3317 5.29 980.81
3318 5.29 978.60
3319 5.29 974.74
3320 5.29 967.00
3321 5.29 964.65
3322 5.29 974.61
3323 5.29 980.69
3324 5.29 966.31
3325 5.29 983.16
3326 5.29 996.29
3327 5.29 991.72
3328 5.29 995.18
3329 5.29 998.63
3330 5.29 1002.10
3331 5.29 1005.50
3332 5.29 1004.90
3333 5.29 1010.70
3334 5.29 1011.40
3335 5.29 1008.50
3336 5.29 1007.80
3337 5.29 1014.40
3338 5.29 1012.80
3339 5.29 1013.10
3340 5.29 1013.50
3341 5.29 1009.00
3342 5.29 1001.50
3343 5.29 1006.30
3344 5.29 1010.30
3345 -6.26 1013.40
3346 -1.45 1011.30
3347 0.32 1008.20
3348 -0.29 1005.20
3349 -0.94 1002.10
3350 -4.58 999.10
3351 -5.37 996.05
3352 -2.13 993.00
3353 -0.40 982.07
3354 0.40 974.84
3355 -0.60 966.29
3356 -3.14 978.57
3357 -3.96 989.56
3358 -1.60 994.16
3359 -6.22 1011.10
3360 -9.57 1018.40
3361 -6.64 1013.40
3362 -0.41 1002.50
3363 -1.95 996.70
3364 -3.40 998.84
3365 -1.00 992.10
3366 4.54 984.42
3367 0.25 986.59
3368 -3.59 980.67
3369 -7.89 978.54
3370 -6.54 981.44
3371 -3.79 978.96
3372 -2.78 973.77
3373 -7.13 981.05
3374 -6.86 989.91
3375 -4.83 999.36
3376 -1.20 994.44
3377 1.34 993.38
3378 3.00 990.05
3379 2.94 984.15
3380 3.14 987.43
3381 2.33 979.83
3382 1.49 972.23
3383 1.51 969.93
3384 2.54 981.17
3385 3.11 991.30
3386 0.97 989.97
3387 2.09 987.13
3388 3.02 988.74
3389 3.29 992.66
3390 4.40 991.75
3391 6.76 988.02
3392 7.92 986.99
3393 6.00 991.56
3394 3.33 1001.20
3395 2.51 998.10
3396 6.14 997.14
3397 7.67 1000.40
3398 7.88 1004.00
3399 10.24 1002.70
3400 11.94 1002.40
3401 10.14 1000.50
3402 8.49 1005.30
3403 5.87 1005.90
3404 5.69 1003.70
3405 4.22 1002.70
3406 2.36 1002.20
3407 2.00 998.97
3408 3.36 996.75
3409 4.10 996.33
3410 6.17 996.48
3411 6.47 1003.00
3412 7.37 1010.90
3413 10.30 1015.90
3414 12.31 1012.90
3415 13.19 1008.40
3416 13.97 1002.60
3417 11.48 995.16
3418 9.82 994.54
3419 9.32 994.69
3420 10.17 994.41
3421 8.98 988.45
3422 8.51 983.59
3423 9.21 983.24
3424 9.01 988.23
3425 12.43 992.17
3426 9.75 994.76
3427 12.92 998.57
3428 10.46 990.97
3429 11.58 988.23
3430 9.29 984.48
3431 9.01 989.94
3432 7.61 990.55
3433 11.00 984.68
3434 8.75 987.18
3435 9.53 988.66
3436 16.47 998.41
3437 20.48 996.81
3438 14.26 1000.50
3439 14.24 1004.20
3440 15.78 1000.90
3441 12.05 1001.60
3442 15.56 998.72
3443 22.09 994.24
3444 22.78 994.72
3445 20.06 994.48
3446 22.61 993.61
3447 22.52 994.06
3448 19.23 990.65
3449 10.72 990.41
3450 9.12 989.76
3451 11.11 988.98
3452 13.59 990.97
3453 14.74 989.50
3454 13.55 983.40
3455 14.71 981.84
3456 13.96 976.58
3457 12.89 977.04
3458 15.15 984.42
3459 13.18 984.99
3460 14.50 985.38
3461 12.42 990.08
3462 14.62 993.73
3463 16.72 997.67
3464 18.70 1002.70
3465 21.05 1001.90
3466 20.67 998.33
3467 22.27 994.55
3468 21.76 995.40
3469 17.36 996.25
3470 11.98 997.10
3471 14.81 997.95
3472 18.31 993.62
3473 19.96 992.38
3474 21.72 994.26
3475 21.67 995.10
3476 20.39 996.29
3477 18.84 995.44
3478 15.67 988.48
3479 14.04 992.33
3480 13.17 997.93
3481 14.04 993.32
3482 15.17 985.38
3483 15.71 986.95
3484 18.74 989.02
3485 18.34 988.31
3486 18.03 991.22
3487 18.72 988.16
3488 23.52 986.79
3489 22.65 985.82
3490 19.24 988.95
3491 17.35 995.65
3492 18.82 995.25
3493 21.34 997.55
3494 21.37 995.88
3495 21.00 991.36
3496 17.54 992.02
3497 16.35 993.50
3498 11.56 998.01
3499 11.73 1003.00
3500 14.93 1003.00
3501 15.68 998.51
3502 17.07 994.25
3503 15.82 987.02
3504 18.50 981.73
3505 16.67 975.49
3506 14.31 977.91
3507 11.98 981.27
3508 10.90 985.01
3509 11.99 991.47
3510 12.53 996.84
3511 13.87 999.80
3512 15.88 998.41
3513 17.40 994.44
3514 16.89 993.21
3515 13.77 991.55
3516 14.27 991.21
3517 12.47 991.40
3518 13.52 995.99
3519 15.52 996.19
3520 15.06 997.95
3521 15.10 998.70
3522 14.21 999.45
3523 17.91 1000.20
3524 21.20 996.67
3525 18.52 988.84
3526 13.69 986.23
3527 12.93 981.40
3528 11.70 984.03
3529 12.30 986.66
3530 12.78 989.30
3531 12.37 994.52
3532 12.63 999.53
3533 15.40 998.60
3534 13.85 991.00
3535 13.32 982.69
3536 13.39 975.96
3537 12.13 979.93
3538 10.01 983.91
3539 11.60 990.50
3540 12.61 983.89
3541 13.04 969.75
3542 12.24 961.43
3543 12.65 970.90
3544 11.06 983.91
3545 10.16 992.19
3546 7.65 998.14
3547 10.12 997.65
3548 12.11 991.38
3549 11.84 991.24
3550 10.55 980.74
3551 9.12 974.47
3552 6.55 983.85
3553 6.75 996.32
3554 6.91 999.10
3555 11.16 993.87
3556 8.99 994.01
3557 9.42 995.23
3558 14.11 993.61
3559 7.03 1004.30
3560 7.06 999.28
3561 6.71 989.29
3562 7.22 977.51
3563 9.27 973.21
3564 9.51 968.91
3565 8.39 963.86
3566 6.26 978.04
3567 3.10 989.54
3568 6.60 977.31
3569 5.70 967.31
3570 3.61 974.77
3571 4.27 994.04
3572 1.86 1008.80
3573 3.60 1007.50
3574 6.02 1001.10
3575 6.24 994.75
3576 7.65 984.25
3577 5.80 973.82
3578 5.64 979.11
3579 3.69 988.50
3580 5.02 991.76
3581 3.19 1002.90
3582 5.54 1007.10
3583 5.89 1009.00
3584 4.80 1010.70
3585 4.03 1008.50
3586 6.31 1002.80
3587 6.16 996.16
3588 6.60 988.96
3589 7.18 987.31
3590 5.56 993.46
3591 9.23 992.69
3592 7.45 996.83
3593 6.91 1000.30
3594 7.33 1004.90
3595 5.83 1007.50
3596 5.65 1003.30
3597 5.71 1001.20
3598 -0.20 1009.30
3599 0.35 1012.30
3600 4.08 1014.10
3601 1.73 1017.80
3602 2.83 1007.00
3603 3.23 994.99
3604 -1.62 1000.70
3605 1.80 995.86
3606 3.39 991.10
3607 3.40 988.62
3608 1.04 988.00
3609 -7.12 1003.30
3610 -0.84 999.09
3611 0.35 1003.80
3612 1.90 1002.90
3613 3.98 990.42
3614 4.36 981.79
3615 2.95 969.90
3616 0.70 957.02
3617 -0.04 969.32
3618 -0.66 988.88
3619 4.41 982.19
3620 2.53 986.46
3621 2.81 971.90
3622 0.24 971.16
3623 1.85 955.12
3624 -0.82 954.49
3625 -1.07 959.91
3626 -1.50 973.03
3627 0.10 980.90
3628 -0.91 977.58
3629 0.16 975.28
3630 -0.69 972.98
3631 -2.15 984.21
3632 0.69 977.20
3633 1.76 974.87
3634 1.63 973.48
3635 1.71 975.27
3636 0.07 973.26
3637 0.95 968.57
3638 0.68 969.64
3639 0.09 980.43
3640 -0.50 989.69
3641 -1.23 993.49
3642 0.19 987.06
3643 1.15 979.67
3644 -0.45 980.42
3645 3.13 970.20
3646 2.89 973.36
3647 -0.76 987.92
3648 1.80 966.86
3649 -0.38 965.45
3650 -0.38 979.85
