# Supplementary material for: Technical Note: Comparison of methane ebullition modelling approaches used in terrestrial wetland models
Source: Copernicus journal article supplement (doi:10.5194/bg-2017-274), 2017-07-04
Supplement: Supplementary file 2 [file bg-2017-274-supplement.zip › ebullition_module/input/Tprof.txt]

272.95 272.95 273.68 274.88 275.45 275.85 276.25 276.65 277.05 277.45 277.85
272.95 272.95 273.68 274.88 275.45 275.85 276.25 276.65 277.05 277.45 277.85
272.95 272.95 273.68 274.88 275.45 275.85 276.25 276.65 277.05 277.45 277.85
272.95 272.95 273.65 274.82 275.41 275.81 276.21 276.62 277.02 277.43 277.83
272.95 272.95 273.65 274.78 275.36 275.76 276.17 276.58 276.99 277.40 277.80
272.95 272.95 273.65 274.78 275.36 275.76 276.17 276.58 276.99 277.40 277.80
272.95 272.95 273.65 274.78 275.36 275.76 276.17 276.58 276.99 277.40 277.80
272.95 272.95 273.65 274.77 275.33 275.74 276.15 276.56 276.97 277.38 277.79
272.95 272.95 273.65 274.72 275.26 275.68 276.09 276.51 276.93 277.34 277.76
272.95 272.95 273.65 274.72 275.26 275.68 276.09 276.51 276.93 277.34 277.76
272.95 272.95 273.64 274.70 275.26 275.68 276.09 276.51 276.93 277.34 277.76
272.95 272.95 273.56 274.68 275.26 275.68 276.09 276.51 276.93 277.34 277.76
272.92 272.92 273.55 274.62 275.18 275.60 276.02 276.45 276.87 277.29 277.72
272.90 272.90 273.55 274.62 275.17 275.59 276.02 276.44 276.86 277.29 277.71
272.92 272.92 273.55 274.62 275.17 275.59 276.02 276.44 276.86 277.29 277.71
272.95 272.95 273.55 274.62 275.17 275.59 276.02 276.44 276.86 277.29 277.71
272.88 272.88 273.53 274.57 275.13 275.56 275.99 276.41 276.84 277.27 277.69
272.85 272.85 273.52 274.52 275.07 275.51 275.94 276.37 276.80 277.23 277.67
272.85 272.85 273.52 274.52 275.07 275.51 275.94 276.37 276.80 277.23 277.67
272.86 272.86 273.52 274.52 275.07 275.51 275.94 276.37 276.80 277.23 277.67
272.85 272.85 273.53 274.52 275.07 275.51 275.94 276.37 276.80 277.23 277.67
272.85 272.85 273.58 274.51 275.07 275.50 275.93 276.37 276.80 277.23 277.66
272.88 272.88 273.58 274.48 275.02 275.46 275.89 276.33 276.77 277.20 277.64
272.95 272.95 273.58 274.52 275.07 275.51 275.94 276.37 276.80 277.23 277.67
272.95 272.95 273.58 274.52 275.07 275.51 275.94 276.37 276.80 277.23 277.67
272.95 272.95 273.58 274.49 275.04 275.48 275.91 276.35 276.78 277.22 277.65
272.95 272.95 273.58 274.45 274.98 275.42 275.86 276.30 276.74 277.18 277.62
272.95 272.95 273.57 274.45 274.98 275.42 275.86 276.30 276.74 277.18 277.62
272.95 272.95 273.52 274.45 274.98 275.42 275.86 276.30 276.74 277.18 277.62
272.95 272.95 273.52 274.45 274.98 275.42 275.86 276.30 276.74 277.18 277.62
272.90 272.90 273.49 274.42 274.98 275.42 275.86 276.30 276.74 277.18 277.62
272.95 272.95 273.49 274.42 274.98 275.42 275.86 276.30 276.74 277.18 277.62
272.91 272.91 273.48 274.38 274.93 275.38 275.82 276.26 276.71 277.15 277.60
272.85 272.85 273.48 274.35 274.89 275.33 275.78 276.23 276.68 277.13 277.57
272.85 272.85 273.48 274.35 274.89 275.33 275.78 276.23 276.68 277.13 277.57
272.85 272.85 273.48 274.35 274.89 275.33 275.78 276.23 276.68 277.13 277.57
272.85 272.85 273.48 274.35 274.88 275.33 275.78 276.23 276.68 277.12 277.57
272.85 272.85 273.48 274.32 274.84 275.29 275.74 276.19 276.65 277.10 277.55
272.85 272.85 273.48 274.28 274.79 275.25 275.70 276.16 276.62 277.07 277.53
272.85 272.85 273.48 274.28 274.79 275.25 275.70 276.16 276.62 277.07 277.53
272.85 272.85 273.48 274.28 274.79 275.25 275.70 276.16 276.62 277.07 277.53
272.86 272.86 273.48 274.28 274.79 275.25 275.70 276.16 276.62 277.07 277.53
272.95 272.95 273.48 274.28 274.79 275.25 275.70 276.16 276.62 277.07 277.53
272.95 272.95 273.48 274.28 274.79 275.25 275.70 276.16 276.62 277.07 277.53
272.95 272.95 273.48 274.28 274.79 275.25 275.70 276.16 276.62 277.07 277.53
272.95 272.95 273.48 274.28 274.79 275.25 275.70 276.16 276.62 277.07 277.53
272.93 272.93 273.45 274.25 274.79 275.25 275.70 276.16 276.62 277.07 277.53
272.85 272.85 273.45 274.19 274.71 275.17 275.64 276.10 276.56 277.03 277.49
272.85 272.85 273.45 274.18 274.70 275.16 275.63 276.09 276.55 277.02 277.48
272.94 272.94 273.45 274.23 274.77 275.23 275.68 276.14 276.60 277.06 277.52
272.95 272.95 273.45 274.23 274.77 275.23 275.68 276.14 276.60 277.06 277.52
272.95 272.95 273.45 274.20 274.72 275.18 275.64 276.11 276.57 277.03 277.49
272.95 272.95 273.45 274.18 274.70 275.16 275.63 276.09 276.55 277.02 277.48
272.95 272.95 273.45 274.18 274.70 275.16 275.63 276.09 276.55 277.02 277.48
272.95 272.95 273.45 274.18 274.70 275.16 275.63 276.09 276.55 277.02 277.48
272.94 272.94 273.45 274.18 274.70 275.16 275.63 276.09 276.55 277.02 277.48
272.85 272.85 273.45 274.18 274.69 275.16 275.62 276.09 276.55 277.02 277.48
272.85 272.85 273.44 274.14 274.64 275.11 275.58 276.05 276.52 276.99 277.46
272.85 272.85 273.43 274.10 274.61 275.08 275.55 276.02 276.49 276.97 277.44
272.95 272.95 273.38 274.24 274.81 275.27 275.72 276.18 276.63 277.08 277.54
272.95 272.95 273.38 274.23 274.80 275.25 275.71 276.16 276.62 277.08 277.53
272.95 272.95 273.37 274.21 274.78 275.23 275.69 276.15 276.61 277.06 277.52
272.95 272.95 273.37 274.19 274.76 275.21 275.67 276.13 276.59 277.05 277.51
272.95 272.95 273.37 274.18 274.73 275.19 275.65 276.12 276.58 277.04 277.50
272.95 272.95 273.37 274.16 274.71 275.17 275.64 276.10 276.56 277.03 277.49
272.96 272.96 273.37 274.14 274.69 275.16 275.62 276.09 276.55 277.01 277.48
272.97 272.97 273.37 274.13 274.67 275.14 275.61 276.07 276.54 277.00 277.47
272.96 272.96 273.36 274.11 274.65 275.12 275.59 276.05 276.52 276.99 277.46
272.97 272.97 273.37 274.10 274.64 275.11 275.57 276.04 276.51 276.98 277.45
272.97 272.97 273.37 274.09 274.62 275.09 275.56 276.03 276.50 276.97 277.44
272.97 272.97 273.36 274.08 274.61 275.08 275.56 276.03 276.50 276.97 277.44
272.97 272.97 273.36 274.08 274.61 275.08 275.55 276.02 276.50 276.97 277.44
272.97 272.97 273.36 274.18 274.75 275.21 275.67 276.13 276.59 277.05 277.51
272.97 272.97 273.36 274.18 274.75 275.21 275.67 276.13 276.59 277.05 277.51
272.98 272.98 273.36 274.18 274.75 275.21 275.67 276.13 276.59 277.05 277.51
272.95 272.95 273.36 274.17 274.74 275.20 275.66 276.12 276.58 277.04 277.50
272.95 272.95 273.36 274.16 274.73 275.19 275.65 276.12 276.58 277.04 277.50
272.95 272.95 273.36 274.15 274.72 275.18 275.65 276.11 276.57 277.03 277.49
272.95 272.95 273.35 274.14 274.71 275.17 275.64 276.10 276.56 277.03 277.49
272.95 272.95 273.35 274.13 274.70 275.17 275.63 276.09 276.56 277.02 277.48
272.95 272.95 273.35 274.12 274.69 275.16 275.62 276.09 276.55 277.01 277.48
272.95 272.95 273.34 274.11 274.68 275.15 275.61 276.08 276.54 277.01 277.47
272.95 272.95 273.34 274.10 274.67 275.14 275.60 276.07 276.54 277.00 277.47
272.95 272.95 273.34 274.09 274.66 275.13 275.60 276.06 276.53 277.00 277.46
272.95 272.95 273.33 274.08 274.65 275.12 275.59 276.06 276.52 276.99 277.46
272.95 272.95 273.33 274.07 274.64 275.11 275.58 276.05 276.52 276.99 277.45
272.95 272.95 273.33 274.06 274.63 275.10 275.57 276.04 276.51 276.98 277.45
272.95 272.95 273.33 274.05 274.62 275.09 275.56 276.03 276.50 276.97 277.44
272.95 272.95 273.32 274.04 274.61 275.08 275.55 276.03 276.50 276.97 277.44
272.95 272.95 273.32 274.03 274.60 275.07 275.55 276.02 276.49 276.96 277.43
272.95 272.95 273.32 274.02 274.59 275.06 275.54 276.01 276.48 276.96 277.43
272.95 272.95 273.31 274.01 274.58 275.05 275.53 276.00 276.48 276.95 277.42
272.95 272.95 273.31 274.00 274.57 275.05 275.52 276.00 276.47 276.94 277.42
272.95 272.95 273.31 273.99 274.56 275.04 275.51 275.99 276.46 276.94 277.41
272.95 272.95 273.31 273.98 274.55 275.03 275.50 275.98 276.46 276.93 277.41
272.95 272.95 273.30 273.97 274.54 275.02 275.50 275.97 276.45 276.93 277.40
272.92 272.92 273.23 273.97 274.53 275.01 275.49 275.97 276.44 276.92 277.40
272.92 272.92 273.22 273.96 274.52 275.00 275.48 275.96 276.44 276.91 277.39
272.92 272.92 273.22 273.95 274.51 274.99 275.47 275.95 276.43 276.91 277.39
272.92 272.92 273.22 273.94 274.50 274.98 275.46 275.94 276.42 276.90 277.38
272.92 272.92 273.21 273.93 274.49 274.97 275.45 275.94 276.42 276.90 277.38
272.93 272.93 273.22 273.93 274.50 274.98 275.46 275.94 276.42 276.90 277.38
272.93 272.93 273.22 273.94 274.50 274.98 275.46 275.94 276.42 276.90 277.38
273.00 273.00 273.24 273.93 274.49 274.97 275.45 275.93 276.42 276.90 277.38
273.66 273.66 273.56 273.94 274.49 274.97 275.45 275.93 276.41 276.90 277.38
274.98 274.98 274.04 274.01 274.52 275.00 275.48 275.96 276.44 276.92 277.40
276.60 276.60 274.89 274.20 274.61 275.09 275.56 276.03 276.50 276.97 277.44
277.25 277.25 275.78 274.54 274.81 275.26 275.71 276.17 276.62 277.08 277.53
277.15 277.15 275.86 274.86 275.07 275.50 275.94 276.37 276.80 277.23 277.67
277.00 277.00 276.24 275.14 275.30 275.72 276.13 276.54 276.95 277.37 277.78
278.87 278.87 276.67 275.36 275.52 275.91 276.30 276.70 277.09 277.49 277.88
280.45 280.45 277.84 275.71 275.73 276.11 276.48 276.86 277.24 277.61 277.99
281.13 281.13 278.59 276.16 276.07 276.42 276.76 277.11 277.46 277.81 278.15
281.87 281.87 279.32 276.65 276.46 276.77 277.09 277.40 277.71 278.03 278.34
282.88 282.88 280.09 277.15 276.86 277.14 277.42 277.70 277.98 278.26 278.54
283.76 283.76 280.96 277.68 277.29 277.54 277.78 278.02 278.27 278.51 278.75
283.65 283.65 281.27 278.19 277.74 277.95 278.15 278.36 278.56 278.77 278.97
283.06 283.06 281.28 278.58 278.14 278.31 278.48 278.65 278.82 278.99 279.16
282.70 282.70 281.22 278.85 278.44 278.59 278.73 278.88 279.02 279.17 279.31
281.77 281.77 280.89 279.02 278.67 278.79 278.92 279.04 279.17 279.30 279.42
280.27 280.27 280.20 279.07 278.80 278.92 279.03 279.15 279.26 279.38 279.49
279.44 279.44 279.55 278.97 278.82 278.93 279.05 279.16 279.27 279.39 279.50
279.58 279.58 279.36 278.82 278.76 278.88 278.99 279.11 279.23 279.35 279.47
279.52 279.52 279.18 278.71 278.68 278.81 278.93 279.06 279.18 279.31 279.43
280.03 280.03 279.26 278.53 278.47 278.61 278.76 278.90 279.04 279.18 279.33
280.67 280.67 279.56 278.54 278.45 278.59 278.74 278.88 279.03 279.17 279.32
281.43 281.43 279.97 278.63 278.49 278.63 278.77 278.91 279.05 279.20 279.34
282.17 282.17 280.45 278.78 278.58 278.72 278.85 278.98 279.12 279.25 279.38
282.84 282.84 281.03 278.99 278.73 278.85 278.97 279.09 279.21 279.33 279.45
283.10 283.10 281.37 279.25 278.92 279.03 279.13 279.23 279.34 279.44 279.55
283.75 283.75 281.88 279.52 279.14 279.22 279.31 279.40 279.48 279.57 279.65
284.08 284.08 282.28 279.81 279.38 279.44 279.51 279.57 279.64 279.71 279.77
283.69 283.69 282.31 280.07 279.61 279.66 279.70 279.75 279.79 279.84 279.89
282.86 282.86 282.06 280.23 279.80 279.83 279.86 279.89 279.92 279.95 279.98
282.71 282.71 281.81 280.28 279.91 279.93 279.95 279.97 279.99 280.01 280.03
282.79 282.79 281.81 280.30 279.96 279.98 280.00 280.01 280.03 280.04 280.06
282.57 282.57 281.76 280.37 280.05 280.06 280.07 280.08 280.08 280.09 280.10
282.62 282.62 281.72 280.39 280.07 280.08 280.08 280.09 280.10 280.10 280.11
282.31 282.31 281.70 280.42 280.11 280.11 280.12 280.12 280.12 280.13 280.13
282.61 282.61 281.65 280.43 280.14 280.15 280.15 280.15 280.15 280.15 280.15
282.98 282.98 281.96 280.48 280.18 280.18 280.18 280.17 280.17 280.17 280.17
282.76 282.76 281.90 280.56 280.26 280.25 280.24 280.23 280.22 280.21 280.20
283.26 283.26 282.15 280.64 280.33 280.31 280.30 280.28 280.27 280.25 280.24
282.81 282.81 282.05 280.74 280.41 280.39 280.37 280.34 280.32 280.30 280.28
282.85 282.85 282.08 280.79 280.48 280.45 280.42 280.39 280.36 280.34 280.31
282.57 282.57 281.98 280.83 280.52 280.49 280.46 280.43 280.39 280.36 280.33
282.45 282.45 281.90 280.84 280.56 280.53 280.49 280.46 280.42 280.39 280.35
282.50 282.50 281.81 280.85 280.59 280.55 280.51 280.47 280.44 280.40 280.36
282.88 282.88 282.06 280.87 280.60 280.56 280.52 280.48 280.45 280.41 280.37
282.56 282.56 281.95 280.92 280.64 280.60 280.56 280.52 280.47 280.43 280.39
282.80 282.80 281.98 280.94 280.67 280.63 280.58 280.54 280.49 280.45 280.40
284.79 284.79 282.73 281.01 280.71 280.66 280.61 280.57 280.52 280.47 280.42
285.85 285.85 283.75 281.28 280.84 280.79 280.73 280.67 280.61 280.55 280.49
285.24 285.24 283.88 281.62 281.10 281.02 280.94 280.86 280.78 280.70 280.61
285.56 285.56 284.05 281.86 281.33 281.23 281.13 281.03 280.93 280.83 280.73
285.45 285.45 284.16 282.06 281.52 281.41 281.29 281.17 281.05 280.94 280.82
285.35 285.35 284.11 282.21 281.69 281.56 281.42 281.29 281.16 281.03 280.90
285.74 285.74 284.26 282.34 281.81 281.67 281.53 281.39 281.25 281.11 280.96
286.33 286.33 284.60 282.49 281.95 281.79 281.64 281.49 281.33 281.18 281.03
286.54 286.54 284.87 282.69 282.10 281.94 281.77 281.60 281.44 281.27 281.11
286.75 286.75 285.02 282.88 282.28 282.10 281.92 281.74 281.55 281.37 281.19
287.11 287.11 285.23 283.06 282.44 282.25 282.05 281.86 281.66 281.47 281.27
287.15 287.15 285.41 283.24 282.62 282.41 282.20 281.99 281.78 281.57 281.36
286.44 286.44 285.43 283.63 283.06 282.81 282.57 282.32 282.07 281.82 281.57
285.21 285.21 284.98 283.72 283.19 282.93 282.67 282.42 282.16 281.90 281.64
285.09 285.09 284.67 283.68 283.23 282.96 282.70 282.44 282.18 281.92 281.66
285.25 285.25 284.58 283.60 283.18 282.92 282.66 282.41 282.15 281.89 281.63
285.50 285.50 284.60 283.55 283.14 282.88 282.63 282.38 282.12 281.87 281.61
285.65 285.65 284.68 283.54 283.13 282.87 282.62 282.37 282.11 281.86 281.61
285.86 285.86 284.78 283.58 283.15 282.90 282.64 282.38 282.13 281.87 281.62
286.02 286.02 284.94 283.65 283.20 282.94 282.68 282.42 282.16 281.90 281.64
286.02 286.02 285.01 283.73 283.27 283.00 282.74 282.47 282.21 281.94 281.68
285.79 285.79 284.97 283.78 283.32 283.05 282.78 282.51 282.24 281.97 281.70
285.81 285.81 285.00 283.82 283.36 283.09 282.81 282.54 282.27 281.99 281.72
285.70 285.70 284.97 283.88 283.42 283.14 282.87 282.59 282.31 282.03 281.75
285.81 285.81 284.99 283.89 283.44 283.16 282.88 282.60 282.32 282.04 281.76
285.95 285.95 285.03 283.91 283.46 283.18 282.90 282.62 282.33 282.05 281.77
286.18 286.18 285.13 283.93 283.47 283.19 282.91 282.62 282.34 282.06 281.78
286.52 286.52 285.26 283.98 283.51 283.23 282.94 282.65 282.37 282.08 281.80
287.02 287.02 285.48 284.06 283.57 283.27 282.98 282.69 282.40 282.11 281.82
287.49 287.49 285.78 284.17 283.64 283.34 283.04 282.75 282.45 282.15 281.86
288.01 288.01 286.08 284.33 283.76 283.45 283.14 282.84 282.53 282.22 281.92
288.49 288.49 286.47 284.54 283.92 283.60 283.28 282.96 282.64 282.32 281.99
288.35 288.35 286.68 284.72 284.05 283.72 283.39 283.06 282.72 282.39 282.06
287.11 287.11 286.44 284.83 284.15 283.81 283.47 283.13 282.79 282.45 282.11
286.83 286.83 286.13 284.86 284.24 283.89 283.54 283.20 282.85 282.50 282.15
287.38 287.38 286.15 284.85 284.27 283.92 283.57 283.22 282.87 282.52 282.17
287.85 287.85 286.35 284.88 284.30 283.94 283.59 283.24 282.88 282.53 282.18
288.18 288.18 286.53 284.96 284.36 284.00 283.64 283.28 282.93 282.57 282.21
288.63 288.63 286.79 285.07 284.44 284.07 283.71 283.34 282.98 282.61 282.25
288.67 288.67 286.97 285.25 284.61 284.23 283.85 283.47 283.09 282.71 282.33
288.75 288.75 287.11 285.45 284.82 284.42 284.03 283.63 283.23 282.83 282.44
288.48 288.48 287.25 285.66 285.01 284.60 284.18 283.77 283.35 282.94 282.53
287.84 287.84 287.08 285.69 285.03 284.61 284.20 283.78 283.37 282.95 282.54
287.36 287.36 286.79 285.61 284.97 284.56 284.15 283.74 283.33 282.92 282.51
287.36 287.36 286.63 285.54 284.94 284.54 284.13 283.72 283.31 282.90 282.50
287.54 287.54 286.61 285.51 284.94 284.53 284.12 283.71 283.31 282.90 282.49
287.59 287.59 286.63 285.49 284.91 284.50 284.10 283.69 283.29 282.88 282.48
287.88 287.88 286.68 285.47 284.89 284.48 284.08 283.68 283.28 282.87 282.47
287.87 287.87 286.76 285.49 284.90 284.49 284.09 283.69 283.28 282.88 282.47
287.97 287.97 286.78 285.52 284.92 284.52 284.11 283.70 283.30 282.89 282.48
288.52 288.52 287.01 285.63 285.02 284.61 284.19 283.78 283.36 282.95 282.53
289.10 289.10 287.30 285.71 285.05 284.63 284.22 283.80 283.38 282.97 282.55
289.52 289.52 287.57 285.81 285.12 284.69 284.27 283.85 283.43 283.00 282.58
289.30 289.30 287.73 285.94 285.21 284.78 284.35 283.92 283.49 283.06 282.63
288.53 288.53 287.54 286.03 285.32 284.88 284.44 284.00 283.56 283.12 282.68
288.60 288.60 287.44 286.06 285.38 284.94 284.49 284.05 283.60 283.16 282.71
289.01 289.01 287.54 286.08 285.42 284.97 284.52 284.07 283.62 283.17 282.73
289.34 289.34 287.68 286.13 285.45 285.00 284.55 284.10 283.65 283.20 282.75
289.43 289.43 287.81 286.20 285.51 285.05 284.60 284.14 283.68 283.23 282.77
289.24 289.24 287.85 286.27 285.57 285.11 284.65 284.19 283.72 283.26 282.80
288.66 288.66 287.67 286.31 285.62 285.15 284.69 284.22 283.76 283.29 282.83
287.93 287.93 287.41 286.29 285.64 285.18 284.71 284.24 283.77 283.31 282.84
287.36 287.36 287.05 286.22 285.62 285.16 284.69 284.22 283.76 283.29 282.83
287.44 287.44 286.87 286.11 285.55 285.09 284.63 284.17 283.71 283.25 282.79
287.74 287.74 286.86 286.06 285.54 285.08 284.62 284.16 283.70 283.25 282.79
288.24 288.24 287.07 286.05 285.50 285.05 284.59 284.14 283.68 283.22 282.77
288.09 288.09 287.12 286.05 285.49 285.03 284.58 284.12 283.67 283.22 282.76
288.53 288.53 287.24 286.13 285.54 285.08 284.63 284.17 283.71 283.25 282.79
288.49 288.49 287.42 286.22 285.60 285.14 284.67 284.21 283.74 283.28 282.82
287.77 287.77 287.25 286.23 285.62 285.15 284.69 284.22 283.76 283.29 282.83
287.48 287.48 287.05 286.20 285.61 285.15 284.68 284.22 283.75 283.29 282.82
287.03 287.03 286.80 286.13 285.58 285.12 284.66 284.20 283.73 283.27 282.81
287.09 287.09 286.64 286.03 285.52 285.06 284.60 284.15 283.69 283.23 282.78
286.92 286.92 286.51 285.94 285.44 284.99 284.54 284.09 283.64 283.19 282.74
286.88 286.88 286.38 285.84 285.36 284.91 284.47 284.03 283.58 283.14 282.70
287.04 287.04 286.37 285.75 285.28 284.84 284.41 283.97 283.53 283.10 282.66
287.49 287.49 286.45 285.70 285.21 284.78 284.35 283.92 283.49 283.06 282.63
287.75 287.75 286.63 285.72 285.21 284.78 284.35 283.92 283.49 283.06 282.63
287.80 287.80 286.82 285.82 285.27 284.84 284.40 283.96 283.53 283.09 282.66
287.39 287.39 286.72 285.85 285.29 284.86 284.42 283.98 283.54 283.10 282.67
287.21 287.21 286.64 285.84 285.30 284.86 284.43 283.99 283.55 283.11 282.67
286.80 286.80 286.46 285.81 285.29 284.85 284.42 283.98 283.54 283.10 282.67
287.12 287.12 286.40 285.75 285.25 284.82 284.38 283.95 283.51 283.08 282.65
287.31 287.31 286.49 285.72 285.22 284.79 284.36 283.93 283.49 283.06 282.63
287.38 287.38 286.53 285.73 285.21 284.78 284.35 283.92 283.49 283.06 282.63
287.25 287.25 286.53 285.74 285.22 284.79 284.36 283.93 283.49 283.06 282.63
287.43 287.43 286.54 285.74 285.22 284.79 284.36 283.93 283.49 283.06 282.63
288.17 288.17 286.74 285.75 285.23 284.79 284.36 283.93 283.50 283.07 282.63
288.24 288.24 286.97 285.82 285.26 284.83 284.39 283.96 283.52 283.09 282.65
287.47 287.47 286.89 285.90 285.32 284.88 284.44 284.00 283.56 283.12 282.68
287.01 287.01 286.65 285.91 285.36 284.91 284.47 284.03 283.58 283.14 282.70
286.92 286.92 286.54 285.87 285.35 284.91 284.47 284.02 283.58 283.14 282.70
286.70 286.70 286.44 285.85 285.35 284.91 284.46 284.02 283.58 283.14 282.69
286.73 286.73 286.37 285.81 285.32 284.88 284.44 284.00 283.56 283.12 282.68
286.63 286.63 286.32 285.76 285.28 284.84 284.41 283.97 283.53 283.10 282.66
286.60 286.60 286.24 285.72 285.24 284.81 284.37 283.94 283.51 283.07 282.64
286.68 286.68 286.20 285.67 285.20 284.77 284.34 283.91 283.48 283.05 282.62
286.57 286.57 286.19 285.64 285.17 284.75 284.32 283.89 283.46 283.04 282.61
286.26 286.26 286.05 285.61 285.15 284.72 284.30 283.87 283.45 283.02 282.60
286.32 286.32 285.98 285.56 285.11 284.69 284.27 283.85 283.42 283.00 282.58
286.36 286.36 285.97 285.51 285.07 284.65 284.23 283.81 283.39 282.97 282.56
286.14 286.14 285.91 285.48 285.04 284.62 284.21 283.79 283.37 282.96 282.54
285.98 285.98 285.79 285.43 285.01 284.59 284.18 283.77 283.35 282.94 282.53
285.82 285.82 285.70 285.38 284.96 284.55 284.15 283.74 283.33 282.92 282.51
285.84 285.84 285.62 285.32 284.92 284.51 284.11 283.70 283.30 282.89 282.48
285.60 285.60 285.53 285.28 284.88 284.47 284.07 283.67 283.27 282.87 282.46
286.20 286.20 285.62 285.23 284.84 284.44 284.04 283.64 283.24 282.84 282.44
285.67 285.67 285.62 285.23 284.81 284.41 284.02 283.62 283.22 282.83 282.43
285.48 285.48 285.42 285.20 284.80 284.41 284.01 283.61 283.22 282.82 282.43
284.73 284.73 285.13 285.13 284.76 284.37 283.98 283.58 283.19 282.80 282.41
284.32 284.32 284.77 285.00 284.68 284.29 283.91 283.52 283.14 282.75 282.37
284.81 284.81 284.72 284.84 284.56 284.18 283.81 283.43 283.06 282.68 282.31
285.25 285.25 284.96 284.78 284.47 284.10 283.73 283.36 283.00 282.63 282.26
284.98 284.98 284.99 284.78 284.44 284.07 283.71 283.34 282.98 282.61 282.25
283.89 283.89 284.49 284.74 284.42 284.06 283.70 283.33 282.97 282.60 282.24
282.85 282.85 283.92 284.59 284.34 283.98 283.63 283.27 282.91 282.56 282.20
282.56 282.56 283.43 284.34 284.18 283.84 283.50 283.15 282.81 282.47 282.12
281.91 281.91 282.98 284.08 283.98 283.66 283.33 283.01 282.68 282.35 282.03
283.21 283.21 283.21 283.85 283.78 283.47 283.16 282.85 282.54 282.23 281.92
282.45 282.45 283.12 283.76 283.64 283.34 283.05 282.75 282.45 282.16 281.86
282.10 282.10 282.79 283.63 283.54 283.25 282.96 282.67 282.38 282.10 281.81
283.51 283.51 283.12 283.49 283.40 283.13 282.85 282.57 282.30 282.02 281.74
282.71 282.71 283.16 283.49 283.34 283.07 282.80 282.53 282.25 281.98 281.71
281.39 281.39 282.53 283.41 283.31 283.04 282.77 282.50 282.23 281.97 281.70
282.14 282.14 282.49 283.23 283.18 282.92 282.67 282.41 282.15 281.89 281.63
281.30 281.30 282.19 283.10 283.05 282.81 282.56 282.31 282.07 281.82 281.57
281.57 281.57 282.11 282.95 282.93 282.69 282.46 282.22 281.98 281.75 281.51
281.38 281.38 281.98 282.82 282.81 282.58 282.36 282.13 281.90 281.68 281.45
282.03 282.03 282.20 282.73 282.70 282.48 282.27 282.05 281.83 281.62 281.40
281.28 281.28 281.92 282.67 282.63 282.42 282.21 282.00 281.79 281.58 281.37
279.87 279.87 281.30 282.54 282.55 282.35 282.14 281.94 281.73 281.53 281.33
279.82 279.82 280.88 282.29 282.39 282.20 282.01 281.82 281.63 281.44 281.25
280.27 280.27 280.93 282.08 282.20 282.02 281.85 281.67 281.50 281.33 281.15
278.94 278.94 280.40 281.92 282.05 281.88 281.72 281.56 281.40 281.24 281.08
279.14 279.14 280.21 281.70 281.88 281.73 281.58 281.44 281.29 281.14 280.99
278.28 278.28 279.78 281.49 281.70 281.57 281.44 281.30 281.17 281.04 280.91
277.82 277.82 279.28 281.23 281.50 281.38 281.27 281.15 281.04 280.92 280.81
278.23 278.23 279.21 280.97 281.27 281.17 281.08 280.98 280.89 280.79 280.70
278.79 278.79 279.40 280.80 281.08 281.00 280.92 280.84 280.77 280.69 280.61
279.15 279.15 279.58 280.73 280.97 280.90 280.83 280.76 280.69 280.62 280.55
279.15 279.15 279.68 280.70 280.90 280.84 280.77 280.71 280.65 280.58 280.52
279.10 279.10 279.66 280.67 280.86 280.80 280.74 280.68 280.62 280.56 280.50
278.31 278.31 279.38 280.62 280.81 280.75 280.70 280.64 280.59 280.53 280.47
277.85 277.85 278.98 280.48 280.72 280.67 280.63 280.58 280.53 280.48 280.43
277.66 277.66 278.81 280.32 280.59 280.55 280.52 280.48 280.44 280.40 280.37
278.15 278.15 278.78 280.16 280.45 280.43 280.40 280.37 280.35 280.32 280.30
278.17 278.17 278.84 280.06 280.34 280.32 280.30 280.29 280.27 280.26 280.24
278.33 278.33 278.87 280.00 280.26 280.25 280.24 280.23 280.22 280.21 280.20
278.46 278.46 278.96 279.96 280.20 280.20 280.19 280.19 280.18 280.18 280.17
278.71 278.71 279.04 279.94 280.16 280.16 280.16 280.16 280.16 280.16 280.16
278.95 278.95 279.22 279.94 280.14 280.14 280.14 280.14 280.14 280.14 280.14
278.66 278.66 279.15 279.96 280.14 280.14 280.14 280.14 280.14 280.14 280.14
279.21 279.21 279.31 279.95 280.13 280.13 280.13 280.13 280.14 280.14 280.14
278.71 278.71 279.27 279.98 280.13 280.13 280.13 280.13 280.14 280.14 280.14
279.53 279.53 279.42 279.97 280.12 280.12 280.13 280.13 280.13 280.13 280.14
279.78 279.78 279.72 280.02 280.13 280.13 280.13 280.14 280.14 280.14 280.14
279.84 279.84 279.84 280.10 280.18 280.18 280.18 280.17 280.17 280.17 280.17
279.77 279.77 279.87 280.16 280.23 280.22 280.22 280.21 280.20 280.20 280.19
279.65 279.65 279.85 280.20 280.27 280.26 280.25 280.24 280.23 280.22 280.21
279.40 279.40 279.74 280.21 280.29 280.28 280.26 280.25 280.24 280.23 280.22
279.30 279.30 279.66 280.19 280.28 280.27 280.26 280.25 280.24 280.23 280.22
278.58 278.58 279.43 280.16 280.27 280.26 280.25 280.24 280.23 280.22 280.21
277.69 277.69 278.93 280.05 280.21 280.21 280.20 280.20 280.19 280.19 280.18
277.77 277.77 278.61 279.87 280.10 280.10 280.11 280.11 280.12 280.12 280.12
277.96 277.96 278.63 279.71 279.96 279.97 279.99 280.01 280.02 280.04 280.06
277.72 277.72 278.50 279.60 279.85 279.87 279.90 279.93 279.95 279.98 280.00
277.50 277.50 278.32 279.49 279.75 279.79 279.82 279.85 279.89 279.92 279.96
277.14 277.14 278.17 279.38 279.65 279.69 279.73 279.78 279.82 279.86 279.90
276.24 276.24 277.68 279.24 279.55 279.60 279.65 279.70 279.75 279.80 279.85
276.07 276.07 277.33 279.03 279.40 279.46 279.53 279.59 279.65 279.72 279.78
276.41 276.41 277.27 278.83 279.22 279.30 279.38 279.46 279.54 279.62 279.70
276.64 276.64 277.34 278.68 279.07 279.16 279.25 279.35 279.44 279.53 279.62
276.12 276.12 277.18 278.58 278.96 279.06 279.16 279.26 279.36 279.46 279.57
275.07 275.07 276.62 278.44 278.86 278.97 279.08 279.19 279.30 279.41 279.52
274.75 274.75 276.21 278.22 278.70 278.82 278.95 279.07 279.19 279.32 279.44
274.77 274.77 276.05 278.00 278.51 278.65 278.79 278.93 279.07 279.21 279.35
274.98 274.98 276.01 277.82 278.33 278.49 278.64 278.80 278.95 279.11 279.26
275.38 275.38 276.12 277.69 278.19 278.36 278.53 278.69 278.86 279.03 279.19
275.81 275.81 276.32 277.62 278.09 278.26 278.44 278.61 278.79 278.96 279.14
274.90 274.90 276.04 277.57 278.03 278.21 278.39 278.57 278.75 278.93 279.11
274.45 274.45 275.72 277.46 277.95 278.14 278.33 278.51 278.70 278.89 279.07
274.02 274.02 275.38 277.29 277.83 278.03 278.22 278.42 278.62 278.82 279.01
274.47 274.47 275.31 277.11 277.68 277.89 278.10 278.31 278.52 278.73 278.94
274.71 274.71 275.49 277.01 277.55 277.77 277.99 278.21 278.44 278.66 278.88
275.16 275.16 275.64 276.97 277.48 277.71 277.93 278.16 278.39 278.62 278.84
274.38 274.38 275.49 276.95 277.44 277.67 277.90 278.13 278.36 278.59 278.82
274.10 274.10 275.17 276.86 277.39 277.62 277.86 278.09 278.33 278.56 278.80
273.95 273.95 275.06 276.75 277.29 277.54 277.78 278.02 278.27 278.51 278.75
273.60 273.60 274.81 276.63 277.20 277.45 277.70 277.95 278.20 278.45 278.71
273.52 273.52 274.66 276.49 277.09 277.35 277.61 277.87 278.13 278.39 278.65
273.54 273.54 274.59 276.38 276.98 277.25 277.52 277.79 278.06 278.33 278.60
273.50 273.50 274.53 276.28 276.88 277.16 277.44 277.72 277.99 278.27 278.55
273.47 273.47 274.47 276.20 276.80 277.09 277.37 277.66 277.94 278.23 278.51
273.40 273.40 274.40 276.12 276.72 277.02 277.31 277.60 277.89 278.18 278.47
273.38 273.38 274.35 276.04 276.64 276.94 277.24 277.54 277.84 278.13 278.43
273.37 273.37 274.32 275.97 276.57 276.88 277.18 277.49 277.79 278.10 278.40
273.35 273.35 274.28 275.90 276.50 276.81 277.12 277.43 277.74 278.06 278.37
273.29 273.29 274.22 275.83 276.43 276.75 277.07 277.38 277.70 278.02 278.33
273.25 273.25 274.17 275.76 276.37 276.69 277.01 277.33 277.65 277.98 278.30
273.24 273.24 274.13 275.70 276.31 276.63 276.96 277.29 277.61 277.94 278.27
273.24 273.24 274.10 275.65 276.25 276.58 276.92 277.25 277.58 277.91 278.24
273.24 273.24 274.08 275.59 276.20 276.53 276.87 277.21 277.54 277.88 278.22
273.24 273.24 274.06 275.55 276.15 276.49 276.83 277.17 277.51 277.85 278.19
273.25 273.25 274.04 275.50 276.10 276.45 276.79 277.13 277.48 277.82 278.17
273.28 273.28 274.04 275.46 276.06 276.40 276.75 277.10 277.45 277.80 278.15
273.29 273.29 274.03 275.43 276.02 276.37 276.72 277.07 277.42 277.78 278.13
273.25 273.25 274.01 275.38 275.97 276.33 276.68 277.04 277.39 277.75 278.11
273.27 273.27 273.99 275.35 275.94 276.30 276.66 277.01 277.37 277.73 278.09
273.09 273.09 273.89 275.30 275.89 276.25 276.62 276.98 277.34 277.70 278.07
273.04 273.04 273.82 275.26 275.85 276.22 276.58 276.95 277.32 277.68 278.05
273.11 273.11 273.84 275.22 275.81 276.18 276.55 276.92 277.29 277.66 278.03
273.19 273.19 273.89 275.20 275.79 276.16 276.53 276.90 277.27 277.64 278.01
273.09 273.09 273.84 275.17 275.76 276.13 276.51 276.88 277.25 277.63 278.00
273.09 273.09 273.84 275.17 275.76 276.13 276.51 276.88 277.25 277.63 278.00
272.95 272.95 273.68 274.88 275.45 275.85 276.25 276.65 277.05 277.45 277.85
272.95 272.95 273.68 274.88 275.45 275.85 276.25 276.65 277.05 277.45 277.85
272.95 272.95 273.68 274.88 275.45 275.85 276.25 276.65 277.05 277.45 277.85
272.95 272.95 273.65 274.82 275.41 275.81 276.21 276.62 277.02 277.43 277.83
272.95 272.95 273.65 274.78 275.36 275.76 276.17 276.58 276.99 277.40 277.80
272.95 272.95 273.65 274.78 275.36 275.76 276.17 276.58 276.99 277.40 277.80
272.95 272.95 273.65 274.78 275.36 275.76 276.17 276.58 276.99 277.40 277.80
272.95 272.95 273.65 274.77 275.33 275.74 276.15 276.56 276.97 277.38 277.79
272.95 272.95 273.65 274.72 275.26 275.68 276.09 276.51 276.93 277.34 277.76
272.95 272.95 273.65 274.72 275.26 275.68 276.09 276.51 276.93 277.34 277.76
272.95 272.95 273.64 274.70 275.26 275.68 276.09 276.51 276.93 277.34 277.76
272.95 272.95 273.56 274.68 275.26 275.68 276.09 276.51 276.93 277.34 277.76
272.92 272.92 273.55 274.62 275.18 275.60 276.02 276.45 276.87 277.29 277.72
272.90 272.90 273.55 274.62 275.17 275.59 276.02 276.44 276.86 277.29 277.71
272.92 272.92 273.55 274.62 275.17 275.59 276.02 276.44 276.86 277.29 277.71
272.95 272.95 273.55 274.62 275.17 275.59 276.02 276.44 276.86 277.29 277.71
272.88 272.88 273.53 274.57 275.13 275.56 275.99 276.41 276.84 277.27 277.69
272.85 272.85 273.52 274.52 275.07 275.51 275.94 276.37 276.80 277.23 277.67
272.85 272.85 273.52 274.52 275.07 275.51 275.94 276.37 276.80 277.23 277.67
272.86 272.86 273.52 274.52 275.07 275.51 275.94 276.37 276.80 277.23 277.67
272.85 272.85 273.53 274.52 275.07 275.51 275.94 276.37 276.80 277.23 277.67
272.85 272.85 273.58 274.51 275.07 275.50 275.93 276.37 276.80 277.23 277.66
272.88 272.88 273.58 274.48 275.02 275.46 275.89 276.33 276.77 277.20 277.64
272.95 272.95 273.58 274.52 275.07 275.51 275.94 276.37 276.80 277.23 277.67
272.95 272.95 273.58 274.52 275.07 275.51 275.94 276.37 276.80 277.23 277.67
272.95 272.95 273.58 274.49 275.04 275.48 275.91 276.35 276.78 277.22 277.65
272.95 272.95 273.58 274.45 274.98 275.42 275.86 276.30 276.74 277.18 277.62
272.95 272.95 273.57 274.45 274.98 275.42 275.86 276.30 276.74 277.18 277.62
272.95 272.95 273.52 274.45 274.98 275.42 275.86 276.30 276.74 277.18 277.62
272.95 272.95 273.52 274.45 274.98 275.42 275.86 276.30 276.74 277.18 277.62
272.90 272.90 273.49 274.42 274.98 275.42 275.86 276.30 276.74 277.18 277.62
272.95 272.95 273.49 274.42 274.98 275.42 275.86 276.30 276.74 277.18 277.62
272.91 272.91 273.48 274.38 274.93 275.38 275.82 276.26 276.71 277.15 277.60
272.85 272.85 273.48 274.35 274.89 275.33 275.78 276.23 276.68 277.13 277.57
272.85 272.85 273.48 274.35 274.89 275.33 275.78 276.23 276.68 277.13 277.57
272.85 272.85 273.48 274.35 274.89 275.33 275.78 276.23 276.68 277.13 277.57
272.85 272.85 273.48 274.35 274.88 275.33 275.78 276.23 276.68 277.12 277.57
272.85 272.85 273.48 274.32 274.84 275.29 275.74 276.19 276.65 277.10 277.55
272.85 272.85 273.48 274.28 274.79 275.25 275.70 276.16 276.62 277.07 277.53
272.85 272.85 273.48 274.28 274.79 275.25 275.70 276.16 276.62 277.07 277.53
272.85 272.85 273.48 274.28 274.79 275.25 275.70 276.16 276.62 277.07 277.53
272.86 272.86 273.48 274.28 274.79 275.25 275.70 276.16 276.62 277.07 277.53
272.95 272.95 273.48 274.28 274.79 275.25 275.70 276.16 276.62 277.07 277.53
272.95 272.95 273.48 274.28 274.79 275.25 275.70 276.16 276.62 277.07 277.53
272.95 272.95 273.48 274.28 274.79 275.25 275.70 276.16 276.62 277.07 277.53
272.95 272.95 273.48 274.28 274.79 275.25 275.70 276.16 276.62 277.07 277.53
272.93 272.93 273.45 274.25 274.79 275.25 275.70 276.16 276.62 277.07 277.53
272.85 272.85 273.45 274.19 274.71 275.17 275.64 276.10 276.56 277.03 277.49
272.85 272.85 273.45 274.18 274.70 275.16 275.63 276.09 276.55 277.02 277.48
272.94 272.94 273.45 274.23 274.77 275.23 275.68 276.14 276.60 277.06 277.52
272.95 272.95 273.45 274.23 274.77 275.23 275.68 276.14 276.60 277.06 277.52
272.95 272.95 273.45 274.20 274.72 275.18 275.64 276.11 276.57 277.03 277.49
272.95 272.95 273.45 274.18 274.70 275.16 275.63 276.09 276.55 277.02 277.48
272.95 272.95 273.45 274.18 274.70 275.16 275.63 276.09 276.55 277.02 277.48
272.95 272.95 273.45 274.18 274.70 275.16 275.63 276.09 276.55 277.02 277.48
272.94 272.94 273.45 274.18 274.70 275.16 275.63 276.09 276.55 277.02 277.48
272.85 272.85 273.45 274.18 274.69 275.16 275.62 276.09 276.55 277.02 277.48
272.85 272.85 273.44 274.14 274.64 275.11 275.58 276.05 276.52 276.99 277.46
272.85 272.85 273.43 274.10 274.61 275.08 275.55 276.02 276.49 276.97 277.44
272.95 272.95 273.38 274.24 274.81 275.27 275.72 276.18 276.63 277.08 277.54
272.95 272.95 273.38 274.23 274.80 275.25 275.71 276.16 276.62 277.08 277.53
272.95 272.95 273.37 274.21 274.78 275.23 275.69 276.15 276.61 277.06 277.52
272.95 272.95 273.37 274.19 274.76 275.21 275.67 276.13 276.59 277.05 277.51
272.95 272.95 273.37 274.18 274.73 275.19 275.65 276.12 276.58 277.04 277.50
272.95 272.95 273.37 274.16 274.71 275.17 275.64 276.10 276.56 277.03 277.49
272.96 272.96 273.37 274.14 274.69 275.16 275.62 276.09 276.55 277.01 277.48
272.97 272.97 273.37 274.13 274.67 275.14 275.61 276.07 276.54 277.00 277.47
272.96 272.96 273.36 274.11 274.65 275.12 275.59 276.05 276.52 276.99 277.46
272.97 272.97 273.37 274.10 274.64 275.11 275.57 276.04 276.51 276.98 277.45
272.97 272.97 273.37 274.09 274.62 275.09 275.56 276.03 276.50 276.97 277.44
272.97 272.97 273.36 274.08 274.61 275.08 275.56 276.03 276.50 276.97 277.44
272.97 272.97 273.36 274.08 274.61 275.08 275.55 276.02 276.50 276.97 277.44
272.97 272.97 273.36 274.18 274.75 275.21 275.67 276.13 276.59 277.05 277.51
272.97 272.97 273.36 274.18 274.75 275.21 275.67 276.13 276.59 277.05 277.51
272.98 272.98 273.36 274.18 274.75 275.21 275.67 276.13 276.59 277.05 277.51
272.95 272.95 273.36 274.17 274.74 275.20 275.66 276.12 276.58 277.04 277.50
272.95 272.95 273.36 274.16 274.73 275.19 275.65 276.12 276.58 277.04 277.50
272.95 272.95 273.36 274.15 274.72 275.18 275.65 276.11 276.57 277.03 277.49
272.95 272.95 273.35 274.14 274.71 275.17 275.64 276.10 276.56 277.03 277.49
272.95 272.95 273.35 274.13 274.70 275.17 275.63 276.09 276.56 277.02 277.48
272.95 272.95 273.35 274.12 274.69 275.16 275.62 276.09 276.55 277.01 277.48
272.95 272.95 273.34 274.11 274.68 275.15 275.61 276.08 276.54 277.01 277.47
272.95 272.95 273.34 274.10 274.67 275.14 275.60 276.07 276.54 277.00 277.47
272.95 272.95 273.34 274.09 274.66 275.13 275.60 276.06 276.53 277.00 277.46
272.95 272.95 273.33 274.08 274.65 275.12 275.59 276.06 276.52 276.99 277.46
272.95 272.95 273.33 274.07 274.64 275.11 275.58 276.05 276.52 276.99 277.45
272.95 272.95 273.33 274.06 274.63 275.10 275.57 276.04 276.51 276.98 277.45
272.95 272.95 273.33 274.05 274.62 275.09 275.56 276.03 276.50 276.97 277.44
272.95 272.95 273.32 274.04 274.61 275.08 275.55 276.03 276.50 276.97 277.44
272.95 272.95 273.32 274.03 274.60 275.07 275.55 276.02 276.49 276.96 277.43
272.95 272.95 273.32 274.02 274.59 275.06 275.54 276.01 276.48 276.96 277.43
272.95 272.95 273.31 274.01 274.58 275.05 275.53 276.00 276.48 276.95 277.42
272.95 272.95 273.31 274.00 274.57 275.05 275.52 276.00 276.47 276.94 277.42
272.95 272.95 273.31 273.99 274.56 275.04 275.51 275.99 276.46 276.94 277.41
272.95 272.95 273.31 273.98 274.55 275.03 275.50 275.98 276.46 276.93 277.41
272.95 272.95 273.30 273.97 274.54 275.02 275.50 275.97 276.45 276.93 277.40
272.92 272.92 273.23 273.97 274.53 275.01 275.49 275.97 276.44 276.92 277.40
272.92 272.92 273.22 273.96 274.52 275.00 275.48 275.96 276.44 276.91 277.39
272.92 272.92 273.22 273.95 274.51 274.99 275.47 275.95 276.43 276.91 277.39
272.92 272.92 273.22 273.94 274.50 274.98 275.46 275.94 276.42 276.90 277.38
272.92 272.92 273.21 273.93 274.49 274.97 275.45 275.94 276.42 276.90 277.38
272.93 272.93 273.22 273.93 274.50 274.98 275.46 275.94 276.42 276.90 277.38
272.93 272.93 273.22 273.94 274.50 274.98 275.46 275.94 276.42 276.90 277.38
273.00 273.00 273.24 273.93 274.49 274.97 275.45 275.93 276.42 276.90 277.38
273.66 273.66 273.56 273.94 274.49 274.97 275.45 275.93 276.41 276.90 277.38
274.98 274.98 274.04 274.01 274.52 275.00 275.48 275.96 276.44 276.92 277.40
276.60 276.60 274.89 274.20 274.61 275.09 275.56 276.03 276.50 276.97 277.44
277.25 277.25 275.78 274.54 274.81 275.26 275.71 276.17 276.62 277.08 277.53
277.15 277.15 275.86 274.86 275.07 275.50 275.94 276.37 276.80 277.23 277.67
277.00 277.00 276.24 275.14 275.30 275.72 276.13 276.54 276.95 277.37 277.78
278.87 278.87 276.67 275.36 275.52 275.91 276.30 276.70 277.09 277.49 277.88
280.45 280.45 277.84 275.71 275.73 276.11 276.48 276.86 277.24 277.61 277.99
281.13 281.13 278.59 276.16 276.07 276.42 276.76 277.11 277.46 277.81 278.15
281.87 281.87 279.32 276.65 276.46 276.77 277.09 277.40 277.71 278.03 278.34
282.88 282.88 280.09 277.15 276.86 277.14 277.42 277.70 277.98 278.26 278.54
283.76 283.76 280.96 277.68 277.29 277.54 277.78 278.02 278.27 278.51 278.75
283.65 283.65 281.27 278.19 277.74 277.95 278.15 278.36 278.56 278.77 278.97
283.06 283.06 281.28 278.58 278.14 278.31 278.48 278.65 278.82 278.99 279.16
282.70 282.70 281.22 278.85 278.44 278.59 278.73 278.88 279.02 279.17 279.31
281.77 281.77 280.89 279.02 278.67 278.79 278.92 279.04 279.17 279.30 279.42
280.27 280.27 280.20 279.07 278.80 278.92 279.03 279.15 279.26 279.38 279.49
279.44 279.44 279.55 278.97 278.82 278.93 279.05 279.16 279.27 279.39 279.50
279.58 279.58 279.36 278.82 278.76 278.88 278.99 279.11 279.23 279.35 279.47
279.52 279.52 279.18 278.71 278.68 278.81 278.93 279.06 279.18 279.31 279.43
280.03 280.03 279.26 278.53 278.47 278.61 278.76 278.90 279.04 279.18 279.33
280.67 280.67 279.56 278.54 278.45 278.59 278.74 278.88 279.03 279.17 279.32
281.43 281.43 279.97 278.63 278.49 278.63 278.77 278.91 279.05 279.20 279.34
282.17 282.17 280.45 278.78 278.58 278.72 278.85 278.98 279.12 279.25 279.38
282.84 282.84 281.03 278.99 278.73 278.85 278.97 279.09 279.21 279.33 279.45
283.10 283.10 281.37 279.25 278.92 279.03 279.13 279.23 279.34 279.44 279.55
283.75 283.75 281.88 279.52 279.14 279.22 279.31 279.40 279.48 279.57 279.65
284.08 284.08 282.28 279.81 279.38 279.44 279.51 279.57 279.64 279.71 279.77
283.69 283.69 282.31 280.07 279.61 279.66 279.70 279.75 279.79 279.84 279.89
282.86 282.86 282.06 280.23 279.80 279.83 279.86 279.89 279.92 279.95 279.98
282.71 282.71 281.81 280.28 279.91 279.93 279.95 279.97 279.99 280.01 280.03
282.79 282.79 281.81 280.30 279.96 279.98 280.00 280.01 280.03 280.04 280.06
282.57 282.57 281.76 280.37 280.05 280.06 280.07 280.08 280.08 280.09 280.10
282.62 282.62 281.72 280.39 280.07 280.08 280.08 280.09 280.10 280.10 280.11
282.31 282.31 281.70 280.42 280.11 280.11 280.12 280.12 280.12 280.13 280.13
282.61 282.61 281.65 280.43 280.14 280.15 280.15 280.15 280.15 280.15 280.15
282.98 282.98 281.96 280.48 280.18 280.18 280.18 280.17 280.17 280.17 280.17
282.76 282.76 281.90 280.56 280.26 280.25 280.24 280.23 280.22 280.21 280.20
283.26 283.26 282.15 280.64 280.33 280.31 280.30 280.28 280.27 280.25 280.24
282.81 282.81 282.05 280.74 280.41 280.39 280.37 280.34 280.32 280.30 280.28
282.85 282.85 282.08 280.79 280.48 280.45 280.42 280.39 280.36 280.34 280.31
282.57 282.57 281.98 280.83 280.52 280.49 280.46 280.43 280.39 280.36 280.33
282.45 282.45 281.90 280.84 280.56 280.53 280.49 280.46 280.42 280.39 280.35
282.50 282.50 281.81 280.85 280.59 280.55 280.51 280.47 280.44 280.40 280.36
282.88 282.88 282.06 280.87 280.60 280.56 280.52 280.48 280.45 280.41 280.37
282.56 282.56 281.95 280.92 280.64 280.60 280.56 280.52 280.47 280.43 280.39
282.80 282.80 281.98 280.94 280.67 280.63 280.58 280.54 280.49 280.45 280.40
284.79 284.79 282.73 281.01 280.71 280.66 280.61 280.57 280.52 280.47 280.42
285.85 285.85 283.75 281.28 280.84 280.79 280.73 280.67 280.61 280.55 280.49
285.24 285.24 283.88 281.62 281.10 281.02 280.94 280.86 280.78 280.70 280.61
285.56 285.56 284.05 281.86 281.33 281.23 281.13 281.03 280.93 280.83 280.73
285.45 285.45 284.16 282.06 281.52 281.41 281.29 281.17 281.05 280.94 280.82
285.35 285.35 284.11 282.21 281.69 281.56 281.42 281.29 281.16 281.03 280.90
285.74 285.74 284.26 282.34 281.81 281.67 281.53 281.39 281.25 281.11 280.96
286.33 286.33 284.60 282.49 281.95 281.79 281.64 281.49 281.33 281.18 281.03
286.54 286.54 284.87 282.69 282.10 281.94 281.77 281.60 281.44 281.27 281.11
286.75 286.75 285.02 282.88 282.28 282.10 281.92 281.74 281.55 281.37 281.19
287.11 287.11 285.23 283.06 282.44 282.25 282.05 281.86 281.66 281.47 281.27
287.15 287.15 285.41 283.24 282.62 282.41 282.20 281.99 281.78 281.57 281.36
286.44 286.44 285.43 283.63 283.06 282.81 282.57 282.32 282.07 281.82 281.57
285.21 285.21 284.98 283.72 283.19 282.93 282.67 282.42 282.16 281.90 281.64
285.09 285.09 284.67 283.68 283.23 282.96 282.70 282.44 282.18 281.92 281.66
285.25 285.25 284.58 283.60 283.18 282.92 282.66 282.41 282.15 281.89 281.63
285.50 285.50 284.60 283.55 283.14 282.88 282.63 282.38 282.12 281.87 281.61
285.65 285.65 284.68 283.54 283.13 282.87 282.62 282.37 282.11 281.86 281.61
285.86 285.86 284.78 283.58 283.15 282.90 282.64 282.38 282.13 281.87 281.62
286.02 286.02 284.94 283.65 283.20 282.94 282.68 282.42 282.16 281.90 281.64
286.02 286.02 285.01 283.73 283.27 283.00 282.74 282.47 282.21 281.94 281.68
285.79 285.79 284.97 283.78 283.32 283.05 282.78 282.51 282.24 281.97 281.70
285.81 285.81 285.00 283.82 283.36 283.09 282.81 282.54 282.27 281.99 281.72
285.70 285.70 284.97 283.88 283.42 283.14 282.87 282.59 282.31 282.03 281.75
285.81 285.81 284.99 283.89 283.44 283.16 282.88 282.60 282.32 282.04 281.76
285.95 285.95 285.03 283.91 283.46 283.18 282.90 282.62 282.33 282.05 281.77
286.18 286.18 285.13 283.93 283.47 283.19 282.91 282.62 282.34 282.06 281.78
286.52 286.52 285.26 283.98 283.51 283.23 282.94 282.65 282.37 282.08 281.80
287.02 287.02 285.48 284.06 283.57 283.27 282.98 282.69 282.40 282.11 281.82
287.49 287.49 285.78 284.17 283.64 283.34 283.04 282.75 282.45 282.15 281.86
288.01 288.01 286.08 284.33 283.76 283.45 283.14 282.84 282.53 282.22 281.92
288.49 288.49 286.47 284.54 283.92 283.60 283.28 282.96 282.64 282.32 281.99
288.35 288.35 286.68 284.72 284.05 283.72 283.39 283.06 282.72 282.39 282.06
287.11 287.11 286.44 284.83 284.15 283.81 283.47 283.13 282.79 282.45 282.11
286.83 286.83 286.13 284.86 284.24 283.89 283.54 283.20 282.85 282.50 282.15
287.38 287.38 286.15 284.85 284.27 283.92 283.57 283.22 282.87 282.52 282.17
287.85 287.85 286.35 284.88 284.30 283.94 283.59 283.24 282.88 282.53 282.18
288.18 288.18 286.53 284.96 284.36 284.00 283.64 283.28 282.93 282.57 282.21
288.63 288.63 286.79 285.07 284.44 284.07 283.71 283.34 282.98 282.61 282.25
288.67 288.67 286.97 285.25 284.61 284.23 283.85 283.47 283.09 282.71 282.33
288.75 288.75 287.11 285.45 284.82 284.42 284.03 283.63 283.23 282.83 282.44
288.48 288.48 287.25 285.66 285.01 284.60 284.18 283.77 283.35 282.94 282.53
287.84 287.84 287.08 285.69 285.03 284.61 284.20 283.78 283.37 282.95 282.54
287.36 287.36 286.79 285.61 284.97 284.56 284.15 283.74 283.33 282.92 282.51
287.36 287.36 286.63 285.54 284.94 284.54 284.13 283.72 283.31 282.90 282.50
287.54 287.54 286.61 285.51 284.94 284.53 284.12 283.71 283.31 282.90 282.49
287.59 287.59 286.63 285.49 284.91 284.50 284.10 283.69 283.29 282.88 282.48
287.88 287.88 286.68 285.47 284.89 284.48 284.08 283.68 283.28 282.87 282.47
287.87 287.87 286.76 285.49 284.90 284.49 284.09 283.69 283.28 282.88 282.47
287.97 287.97 286.78 285.52 284.92 284.52 284.11 283.70 283.30 282.89 282.48
288.52 288.52 287.01 285.63 285.02 284.61 284.19 283.78 283.36 282.95 282.53
289.10 289.10 287.30 285.71 285.05 284.63 284.22 283.80 283.38 282.97 282.55
289.52 289.52 287.57 285.81 285.12 284.69 284.27 283.85 283.43 283.00 282.58
289.30 289.30 287.73 285.94 285.21 284.78 284.35 283.92 283.49 283.06 282.63
288.53 288.53 287.54 286.03 285.32 284.88 284.44 284.00 283.56 283.12 282.68
288.60 288.60 287.44 286.06 285.38 284.94 284.49 284.05 283.60 283.16 282.71
289.01 289.01 287.54 286.08 285.42 284.97 284.52 284.07 283.62 283.17 282.73
289.34 289.34 287.68 286.13 285.45 285.00 284.55 284.10 283.65 283.20 282.75
289.43 289.43 287.81 286.20 285.51 285.05 284.60 284.14 283.68 283.23 282.77
289.24 289.24 287.85 286.27 285.57 285.11 284.65 284.19 283.72 283.26 282.80
288.66 288.66 287.67 286.31 285.62 285.15 284.69 284.22 283.76 283.29 282.83
287.93 287.93 287.41 286.29 285.64 285.18 284.71 284.24 283.77 283.31 282.84
287.36 287.36 287.05 286.22 285.62 285.16 284.69 284.22 283.76 283.29 282.83
287.44 287.44 286.87 286.11 285.55 285.09 284.63 284.17 283.71 283.25 282.79
287.74 287.74 286.86 286.06 285.54 285.08 284.62 284.16 283.70 283.25 282.79
288.24 288.24 287.07 286.05 285.50 285.05 284.59 284.14 283.68 283.22 282.77
288.09 288.09 287.12 286.05 285.49 285.03 284.58 284.12 283.67 283.22 282.76
288.53 288.53 287.24 286.13 285.54 285.08 284.63 284.17 283.71 283.25 282.79
288.49 288.49 287.42 286.22 285.60 285.14 284.67 284.21 283.74 283.28 282.82
287.77 287.77 287.25 286.23 285.62 285.15 284.69 284.22 283.76 283.29 282.83
287.48 287.48 287.05 286.20 285.61 285.15 284.68 284.22 283.75 283.29 282.82
287.03 287.03 286.80 286.13 285.58 285.12 284.66 284.20 283.73 283.27 282.81
287.09 287.09 286.64 286.03 285.52 285.06 284.60 284.15 283.69 283.23 282.78
286.92 286.92 286.51 285.94 285.44 284.99 284.54 284.09 283.64 283.19 282.74
286.88 286.88 286.38 285.84 285.36 284.91 284.47 284.03 283.58 283.14 282.70
287.04 287.04 286.37 285.75 285.28 284.84 284.41 283.97 283.53 283.10 282.66
287.49 287.49 286.45 285.70 285.21 284.78 284.35 283.92 283.49 283.06 282.63
287.75 287.75 286.63 285.72 285.21 284.78 284.35 283.92 283.49 283.06 282.63
287.80 287.80 286.82 285.82 285.27 284.84 284.40 283.96 283.53 283.09 282.66
287.39 287.39 286.72 285.85 285.29 284.86 284.42 283.98 283.54 283.10 282.67
287.21 287.21 286.64 285.84 285.30 284.86 284.43 283.99 283.55 283.11 282.67
286.80 286.80 286.46 285.81 285.29 284.85 284.42 283.98 283.54 283.10 282.67
287.12 287.12 286.40 285.75 285.25 284.82 284.38 283.95 283.51 283.08 282.65
287.31 287.31 286.49 285.72 285.22 284.79 284.36 283.93 283.49 283.06 282.63
287.38 287.38 286.53 285.73 285.21 284.78 284.35 283.92 283.49 283.06 282.63
287.25 287.25 286.53 285.74 285.22 284.79 284.36 283.93 283.49 283.06 282.63
287.43 287.43 286.54 285.74 285.22 284.79 284.36 283.93 283.49 283.06 282.63
288.17 288.17 286.74 285.75 285.23 284.79 284.36 283.93 283.50 283.07 282.63
288.24 288.24 286.97 285.82 285.26 284.83 284.39 283.96 283.52 283.09 282.65
287.47 287.47 286.89 285.90 285.32 284.88 284.44 284.00 283.56 283.12 282.68
287.01 287.01 286.65 285.91 285.36 284.91 284.47 284.03 283.58 283.14 282.70
286.92 286.92 286.54 285.87 285.35 284.91 284.47 284.02 283.58 283.14 282.70
286.70 286.70 286.44 285.85 285.35 284.91 284.46 284.02 283.58 283.14 282.69
286.73 286.73 286.37 285.81 285.32 284.88 284.44 284.00 283.56 283.12 282.68
286.63 286.63 286.32 285.76 285.28 284.84 284.41 283.97 283.53 283.10 282.66
286.60 286.60 286.24 285.72 285.24 284.81 284.37 283.94 283.51 283.07 282.64
286.68 286.68 286.20 285.67 285.20 284.77 284.34 283.91 283.48 283.05 282.62
286.57 286.57 286.19 285.64 285.17 284.75 284.32 283.89 283.46 283.04 282.61
286.26 286.26 286.05 285.61 285.15 284.72 284.30 283.87 283.45 283.02 282.60
286.32 286.32 285.98 285.56 285.11 284.69 284.27 283.85 283.42 283.00 282.58
286.36 286.36 285.97 285.51 285.07 284.65 284.23 283.81 283.39 282.97 282.56
286.14 286.14 285.91 285.48 285.04 284.62 284.21 283.79 283.37 282.96 282.54
285.98 285.98 285.79 285.43 285.01 284.59 284.18 283.77 283.35 282.94 282.53
285.82 285.82 285.70 285.38 284.96 284.55 284.15 283.74 283.33 282.92 282.51
285.84 285.84 285.62 285.32 284.92 284.51 284.11 283.70 283.30 282.89 282.48
285.60 285.60 285.53 285.28 284.88 284.47 284.07 283.67 283.27 282.87 282.46
286.20 286.20 285.62 285.23 284.84 284.44 284.04 283.64 283.24 282.84 282.44
285.67 285.67 285.62 285.23 284.81 284.41 284.02 283.62 283.22 282.83 282.43
285.48 285.48 285.42 285.20 284.80 284.41 284.01 283.61 283.22 282.82 282.43
284.73 284.73 285.13 285.13 284.76 284.37 283.98 283.58 283.19 282.80 282.41
284.32 284.32 284.77 285.00 284.68 284.29 283.91 283.52 283.14 282.75 282.37
284.81 284.81 284.72 284.84 284.56 284.18 283.81 283.43 283.06 282.68 282.31
285.25 285.25 284.96 284.78 284.47 284.10 283.73 283.36 283.00 282.63 282.26
284.98 284.98 284.99 284.78 284.44 284.07 283.71 283.34 282.98 282.61 282.25
283.89 283.89 284.49 284.74 284.42 284.06 283.70 283.33 282.97 282.60 282.24
282.85 282.85 283.92 284.59 284.34 283.98 283.63 283.27 282.91 282.56 282.20
282.56 282.56 283.43 284.34 284.18 283.84 283.50 283.15 282.81 282.47 282.12
281.91 281.91 282.98 284.08 283.98 283.66 283.33 283.01 282.68 282.35 282.03
283.21 283.21 283.21 283.85 283.78 283.47 283.16 282.85 282.54 282.23 281.92
282.45 282.45 283.12 283.76 283.64 283.34 283.05 282.75 282.45 282.16 281.86
282.10 282.10 282.79 283.63 283.54 283.25 282.96 282.67 282.38 282.10 281.81
283.51 283.51 283.12 283.49 283.40 283.13 282.85 282.57 282.30 282.02 281.74
282.71 282.71 283.16 283.49 283.34 283.07 282.80 282.53 282.25 281.98 281.71
281.39 281.39 282.53 283.41 283.31 283.04 282.77 282.50 282.23 281.97 281.70
282.14 282.14 282.49 283.23 283.18 282.92 282.67 282.41 282.15 281.89 281.63
281.30 281.30 282.19 283.10 283.05 282.81 282.56 282.31 282.07 281.82 281.57
281.57 281.57 282.11 282.95 282.93 282.69 282.46 282.22 281.98 281.75 281.51
281.38 281.38 281.98 282.82 282.81 282.58 282.36 282.13 281.90 281.68 281.45
282.03 282.03 282.20 282.73 282.70 282.48 282.27 282.05 281.83 281.62 281.40
281.28 281.28 281.92 282.67 282.63 282.42 282.21 282.00 281.79 281.58 281.37
279.87 279.87 281.30 282.54 282.55 282.35 282.14 281.94 281.73 281.53 281.33
279.82 279.82 280.88 282.29 282.39 282.20 282.01 281.82 281.63 281.44 281.25
280.27 280.27 280.93 282.08 282.20 282.02 281.85 281.67 281.50 281.33 281.15
278.94 278.94 280.40 281.92 282.05 281.88 281.72 281.56 281.40 281.24 281.08
279.14 279.14 280.21 281.70 281.88 281.73 281.58 281.44 281.29 281.14 280.99
278.28 278.28 279.78 281.49 281.70 281.57 281.44 281.30 281.17 281.04 280.91
277.82 277.82 279.28 281.23 281.50 281.38 281.27 281.15 281.04 280.92 280.81
278.23 278.23 279.21 280.97 281.27 281.17 281.08 280.98 280.89 280.79 280.70
278.79 278.79 279.40 280.80 281.08 281.00 280.92 280.84 280.77 280.69 280.61
279.15 279.15 279.58 280.73 280.97 280.90 280.83 280.76 280.69 280.62 280.55
279.15 279.15 279.68 280.70 280.90 280.84 280.77 280.71 280.65 280.58 280.52
279.10 279.10 279.66 280.67 280.86 280.80 280.74 280.68 280.62 280.56 280.50
278.31 278.31 279.38 280.62 280.81 280.75 280.70 280.64 280.59 280.53 280.47
277.85 277.85 278.98 280.48 280.72 280.67 280.63 280.58 280.53 280.48 280.43
277.66 277.66 278.81 280.32 280.59 280.55 280.52 280.48 280.44 280.40 280.37
278.15 278.15 278.78 280.16 280.45 280.43 280.40 280.37 280.35 280.32 280.30
278.17 278.17 278.84 280.06 280.34 280.32 280.30 280.29 280.27 280.26 280.24
278.33 278.33 278.87 280.00 280.26 280.25 280.24 280.23 280.22 280.21 280.20
278.46 278.46 278.96 279.96 280.20 280.20 280.19 280.19 280.18 280.18 280.17
278.71 278.71 279.04 279.94 280.16 280.16 280.16 280.16 280.16 280.16 280.16
278.95 278.95 279.22 279.94 280.14 280.14 280.14 280.14 280.14 280.14 280.14
278.66 278.66 279.15 279.96 280.14 280.14 280.14 280.14 280.14 280.14 280.14
279.21 279.21 279.31 279.95 280.13 280.13 280.13 280.13 280.14 280.14 280.14
278.71 278.71 279.27 279.98 280.13 280.13 280.13 280.13 280.14 280.14 280.14
279.53 279.53 279.42 279.97 280.12 280.12 280.13 280.13 280.13 280.13 280.14
279.78 279.78 279.72 280.02 280.13 280.13 280.13 280.14 280.14 280.14 280.14
279.84 279.84 279.84 280.10 280.18 280.18 280.18 280.17 280.17 280.17 280.17
279.77 279.77 279.87 280.16 280.23 280.22 280.22 280.21 280.20 280.20 280.19
279.65 279.65 279.85 280.20 280.27 280.26 280.25 280.24 280.23 280.22 280.21
279.40 279.40 279.74 280.21 280.29 280.28 280.26 280.25 280.24 280.23 280.22
279.30 279.30 279.66 280.19 280.28 280.27 280.26 280.25 280.24 280.23 280.22
278.58 278.58 279.43 280.16 280.27 280.26 280.25 280.24 280.23 280.22 280.21
277.69 277.69 278.93 280.05 280.21 280.21 280.20 280.20 280.19 280.19 280.18
277.77 277.77 278.61 279.87 280.10 280.10 280.11 280.11 280.12 280.12 280.12
277.96 277.96 278.63 279.71 279.96 279.97 279.99 280.01 280.02 280.04 280.06
277.72 277.72 278.50 279.60 279.85 279.87 279.90 279.93 279.95 279.98 280.00
277.50 277.50 278.32 279.49 279.75 279.79 279.82 279.85 279.89 279.92 279.96
277.14 277.14 278.17 279.38 279.65 279.69 279.73 279.78 279.82 279.86 279.90
276.24 276.24 277.68 279.24 279.55 279.60 279.65 279.70 279.75 279.80 279.85
276.07 276.07 277.33 279.03 279.40 279.46 279.53 279.59 279.65 279.72 279.78
276.41 276.41 277.27 278.83 279.22 279.30 279.38 279.46 279.54 279.62 279.70
276.64 276.64 277.34 278.68 279.07 279.16 279.25 279.35 279.44 279.53 279.62
276.12 276.12 277.18 278.58 278.96 279.06 279.16 279.26 279.36 279.46 279.57
275.07 275.07 276.62 278.44 278.86 278.97 279.08 279.19 279.30 279.41 279.52
274.75 274.75 276.21 278.22 278.70 278.82 278.95 279.07 279.19 279.32 279.44
274.77 274.77 276.05 278.00 278.51 278.65 278.79 278.93 279.07 279.21 279.35
274.98 274.98 276.01 277.82 278.33 278.49 278.64 278.80 278.95 279.11 279.26
275.38 275.38 276.12 277.69 278.19 278.36 278.53 278.69 278.86 279.03 279.19
275.81 275.81 276.32 277.62 278.09 278.26 278.44 278.61 278.79 278.96 279.14
274.90 274.90 276.04 277.57 278.03 278.21 278.39 278.57 278.75 278.93 279.11
274.45 274.45 275.72 277.46 277.95 278.14 278.33 278.51 278.70 278.89 279.07
274.02 274.02 275.38 277.29 277.83 278.03 278.22 278.42 278.62 278.82 279.01
274.47 274.47 275.31 277.11 277.68 277.89 278.10 278.31 278.52 278.73 278.94
274.71 274.71 275.49 277.01 277.55 277.77 277.99 278.21 278.44 278.66 278.88
275.16 275.16 275.64 276.97 277.48 277.71 277.93 278.16 278.39 278.62 278.84
274.38 274.38 275.49 276.95 277.44 277.67 277.90 278.13 278.36 278.59 278.82
274.10 274.10 275.17 276.86 277.39 277.62 277.86 278.09 278.33 278.56 278.80
273.95 273.95 275.06 276.75 277.29 277.54 277.78 278.02 278.27 278.51 278.75
273.60 273.60 274.81 276.63 277.20 277.45 277.70 277.95 278.20 278.45 278.71
273.52 273.52 274.66 276.49 277.09 277.35 277.61 277.87 278.13 278.39 278.65
273.54 273.54 274.59 276.38 276.98 277.25 277.52 277.79 278.06 278.33 278.60
273.50 273.50 274.53 276.28 276.88 277.16 277.44 277.72 277.99 278.27 278.55
273.47 273.47 274.47 276.20 276.80 277.09 277.37 277.66 277.94 278.23 278.51
273.40 273.40 274.40 276.12 276.72 277.02 277.31 277.60 277.89 278.18 278.47
273.38 273.38 274.35 276.04 276.64 276.94 277.24 277.54 277.84 278.13 278.43
273.37 273.37 274.32 275.97 276.57 276.88 277.18 277.49 277.79 278.10 278.40
273.35 273.35 274.28 275.90 276.50 276.81 277.12 277.43 277.74 278.06 278.37
273.29 273.29 274.22 275.83 276.43 276.75 277.07 277.38 277.70 278.02 278.33
273.25 273.25 274.17 275.76 276.37 276.69 277.01 277.33 277.65 277.98 278.30
273.24 273.24 274.13 275.70 276.31 276.63 276.96 277.29 277.61 277.94 278.27
273.24 273.24 274.10 275.65 276.25 276.58 276.92 277.25 277.58 277.91 278.24
273.24 273.24 274.08 275.59 276.20 276.53 276.87 277.21 277.54 277.88 278.22
273.24 273.24 274.06 275.55 276.15 276.49 276.83 277.17 277.51 277.85 278.19
273.25 273.25 274.04 275.50 276.10 276.45 276.79 277.13 277.48 277.82 278.17
273.28 273.28 274.04 275.46 276.06 276.40 276.75 277.10 277.45 277.80 278.15
273.29 273.29 274.03 275.43 276.02 276.37 276.72 277.07 277.42 277.78 278.13
273.25 273.25 274.01 275.38 275.97 276.33 276.68 277.04 277.39 277.75 278.11
273.27 273.27 273.99 275.35 275.94 276.30 276.66 277.01 277.37 277.73 278.09
273.09 273.09 273.89 275.30 275.89 276.25 276.62 276.98 277.34 277.70 278.07
273.04 273.04 273.82 275.26 275.85 276.22 276.58 276.95 277.32 277.68 278.05
273.11 273.11 273.84 275.22 275.81 276.18 276.55 276.92 277.29 277.66 278.03
273.19 273.19 273.89 275.20 275.79 276.16 276.53 276.90 277.27 277.64 278.01
273.09 273.09 273.84 275.17 275.76 276.13 276.51 276.88 277.25 277.63 278.00
273.09 273.09 273.84 275.17 275.76 276.13 276.51 276.88 277.25 277.63 278.00
272.95 272.95 273.68 274.88 275.45 275.85 276.25 276.65 277.05 277.45 277.85
272.95 272.95 273.68 274.88 275.45 275.85 276.25 276.65 277.05 277.45 277.85
272.95 272.95 273.68 274.88 275.45 275.85 276.25 276.65 277.05 277.45 277.85
272.95 272.95 273.65 274.82 275.41 275.81 276.21 276.62 277.02 277.43 277.83
272.95 272.95 273.65 274.78 275.36 275.76 276.17 276.58 276.99 277.40 277.80
272.95 272.95 273.65 274.78 275.36 275.76 276.17 276.58 276.99 277.40 277.80
272.95 272.95 273.65 274.78 275.36 275.76 276.17 276.58 276.99 277.40 277.80
272.95 272.95 273.65 274.77 275.33 275.74 276.15 276.56 276.97 277.38 277.79
272.95 272.95 273.65 274.72 275.26 275.68 276.09 276.51 276.93 277.34 277.76
272.95 272.95 273.65 274.72 275.26 275.68 276.09 276.51 276.93 277.34 277.76
272.95 272.95 273.64 274.70 275.26 275.68 276.09 276.51 276.93 277.34 277.76
272.95 272.95 273.56 274.68 275.26 275.68 276.09 276.51 276.93 277.34 277.76
272.92 272.92 273.55 274.62 275.18 275.60 276.02 276.45 276.87 277.29 277.72
272.90 272.90 273.55 274.62 275.17 275.59 276.02 276.44 276.86 277.29 277.71
272.92 272.92 273.55 274.62 275.17 275.59 276.02 276.44 276.86 277.29 277.71
272.95 272.95 273.55 274.62 275.17 275.59 276.02 276.44 276.86 277.29 277.71
272.88 272.88 273.53 274.57 275.13 275.56 275.99 276.41 276.84 277.27 277.69
272.85 272.85 273.52 274.52 275.07 275.51 275.94 276.37 276.80 277.23 277.67
272.85 272.85 273.52 274.52 275.07 275.51 275.94 276.37 276.80 277.23 277.67
272.86 272.86 273.52 274.52 275.07 275.51 275.94 276.37 276.80 277.23 277.67
272.85 272.85 273.53 274.52 275.07 275.51 275.94 276.37 276.80 277.23 277.67
272.85 272.85 273.58 274.51 275.07 275.50 275.93 276.37 276.80 277.23 277.66
272.88 272.88 273.58 274.48 275.02 275.46 275.89 276.33 276.77 277.20 277.64
272.95 272.95 273.58 274.52 275.07 275.51 275.94 276.37 276.80 277.23 277.67
272.95 272.95 273.58 274.52 275.07 275.51 275.94 276.37 276.80 277.23 277.67
272.95 272.95 273.58 274.49 275.04 275.48 275.91 276.35 276.78 277.22 277.65
272.95 272.95 273.58 274.45 274.98 275.42 275.86 276.30 276.74 277.18 277.62
272.95 272.95 273.57 274.45 274.98 275.42 275.86 276.30 276.74 277.18 277.62
272.95 272.95 273.52 274.45 274.98 275.42 275.86 276.30 276.74 277.18 277.62
272.95 272.95 273.52 274.45 274.98 275.42 275.86 276.30 276.74 277.18 277.62
272.90 272.90 273.49 274.42 274.98 275.42 275.86 276.30 276.74 277.18 277.62
272.95 272.95 273.49 274.42 274.98 275.42 275.86 276.30 276.74 277.18 277.62
272.91 272.91 273.48 274.38 274.93 275.38 275.82 276.26 276.71 277.15 277.60
272.85 272.85 273.48 274.35 274.89 275.33 275.78 276.23 276.68 277.13 277.57
272.85 272.85 273.48 274.35 274.89 275.33 275.78 276.23 276.68 277.13 277.57
272.85 272.85 273.48 274.35 274.89 275.33 275.78 276.23 276.68 277.13 277.57
272.85 272.85 273.48 274.35 274.88 275.33 275.78 276.23 276.68 277.12 277.57
272.85 272.85 273.48 274.32 274.84 275.29 275.74 276.19 276.65 277.10 277.55
272.85 272.85 273.48 274.28 274.79 275.25 275.70 276.16 276.62 277.07 277.53
272.85 272.85 273.48 274.28 274.79 275.25 275.70 276.16 276.62 277.07 277.53
272.85 272.85 273.48 274.28 274.79 275.25 275.70 276.16 276.62 277.07 277.53
272.86 272.86 273.48 274.28 274.79 275.25 275.70 276.16 276.62 277.07 277.53
272.95 272.95 273.48 274.28 274.79 275.25 275.70 276.16 276.62 277.07 277.53
272.95 272.95 273.48 274.28 274.79 275.25 275.70 276.16 276.62 277.07 277.53
272.95 272.95 273.48 274.28 274.79 275.25 275.70 276.16 276.62 277.07 277.53
272.95 272.95 273.48 274.28 274.79 275.25 275.70 276.16 276.62 277.07 277.53
272.93 272.93 273.45 274.25 274.79 275.25 275.70 276.16 276.62 277.07 277.53
272.85 272.85 273.45 274.19 274.71 275.17 275.64 276.10 276.56 277.03 277.49
272.85 272.85 273.45 274.18 274.70 275.16 275.63 276.09 276.55 277.02 277.48
272.94 272.94 273.45 274.23 274.77 275.23 275.68 276.14 276.60 277.06 277.52
272.95 272.95 273.45 274.23 274.77 275.23 275.68 276.14 276.60 277.06 277.52
272.95 272.95 273.45 274.20 274.72 275.18 275.64 276.11 276.57 277.03 277.49
272.95 272.95 273.45 274.18 274.70 275.16 275.63 276.09 276.55 277.02 277.48
272.95 272.95 273.45 274.18 274.70 275.16 275.63 276.09 276.55 277.02 277.48
272.95 272.95 273.45 274.18 274.70 275.16 275.63 276.09 276.55 277.02 277.48
272.94 272.94 273.45 274.18 274.70 275.16 275.63 276.09 276.55 277.02 277.48
272.85 272.85 273.45 274.18 274.69 275.16 275.62 276.09 276.55 277.02 277.48
272.85 272.85 273.44 274.14 274.64 275.11 275.58 276.05 276.52 276.99 277.46
272.85 272.85 273.43 274.10 274.61 275.08 275.55 276.02 276.49 276.97 277.44
272.95 272.95 273.38 274.24 274.81 275.27 275.72 276.18 276.63 277.08 277.54
272.95 272.95 273.38 274.23 274.80 275.25 275.71 276.16 276.62 277.08 277.53
272.95 272.95 273.37 274.21 274.78 275.23 275.69 276.15 276.61 277.06 277.52
272.95 272.95 273.37 274.19 274.76 275.21 275.67 276.13 276.59 277.05 277.51
272.95 272.95 273.37 274.18 274.73 275.19 275.65 276.12 276.58 277.04 277.50
272.95 272.95 273.37 274.16 274.71 275.17 275.64 276.10 276.56 277.03 277.49
272.96 272.96 273.37 274.14 274.69 275.16 275.62 276.09 276.55 277.01 277.48
272.97 272.97 273.37 274.13 274.67 275.14 275.61 276.07 276.54 277.00 277.47
272.96 272.96 273.36 274.11 274.65 275.12 275.59 276.05 276.52 276.99 277.46
272.97 272.97 273.37 274.10 274.64 275.11 275.57 276.04 276.51 276.98 277.45
272.97 272.97 273.37 274.09 274.62 275.09 275.56 276.03 276.50 276.97 277.44
272.97 272.97 273.36 274.08 274.61 275.08 275.56 276.03 276.50 276.97 277.44
272.97 272.97 273.36 274.08 274.61 275.08 275.55 276.02 276.50 276.97 277.44
272.97 272.97 273.36 274.18 274.75 275.21 275.67 276.13 276.59 277.05 277.51
272.97 272.97 273.36 274.18 274.75 275.21 275.67 276.13 276.59 277.05 277.51
272.98 272.98 273.36 274.18 274.75 275.21 275.67 276.13 276.59 277.05 277.51
272.95 272.95 273.36 274.17 274.74 275.20 275.66 276.12 276.58 277.04 277.50
272.95 272.95 273.36 274.16 274.73 275.19 275.65 276.12 276.58 277.04 277.50
272.95 272.95 273.36 274.15 274.72 275.18 275.65 276.11 276.57 277.03 277.49
272.95 272.95 273.35 274.14 274.71 275.17 275.64 276.10 276.56 277.03 277.49
272.95 272.95 273.35 274.13 274.70 275.17 275.63 276.09 276.56 277.02 277.48
272.95 272.95 273.35 274.12 274.69 275.16 275.62 276.09 276.55 277.01 277.48
272.95 272.95 273.34 274.11 274.68 275.15 275.61 276.08 276.54 277.01 277.47
272.95 272.95 273.34 274.10 274.67 275.14 275.60 276.07 276.54 277.00 277.47
272.95 272.95 273.34 274.09 274.66 275.13 275.60 276.06 276.53 277.00 277.46
272.95 272.95 273.33 274.08 274.65 275.12 275.59 276.06 276.52 276.99 277.46
272.95 272.95 273.33 274.07 274.64 275.11 275.58 276.05 276.52 276.99 277.45
272.95 272.95 273.33 274.06 274.63 275.10 275.57 276.04 276.51 276.98 277.45
272.95 272.95 273.33 274.05 274.62 275.09 275.56 276.03 276.50 276.97 277.44
272.95 272.95 273.32 274.04 274.61 275.08 275.55 276.03 276.50 276.97 277.44
272.95 272.95 273.32 274.03 274.60 275.07 275.55 276.02 276.49 276.96 277.43
272.95 272.95 273.32 274.02 274.59 275.06 275.54 276.01 276.48 276.96 277.43
272.95 272.95 273.31 274.01 274.58 275.05 275.53 276.00 276.48 276.95 277.42
272.95 272.95 273.31 274.00 274.57 275.05 275.52 276.00 276.47 276.94 277.42
272.95 272.95 273.31 273.99 274.56 275.04 275.51 275.99 276.46 276.94 277.41
272.95 272.95 273.31 273.98 274.55 275.03 275.50 275.98 276.46 276.93 277.41
272.95 272.95 273.30 273.97 274.54 275.02 275.50 275.97 276.45 276.93 277.40
272.92 272.92 273.23 273.97 274.53 275.01 275.49 275.97 276.44 276.92 277.40
272.92 272.92 273.22 273.96 274.52 275.00 275.48 275.96 276.44 276.91 277.39
272.92 272.92 273.22 273.95 274.51 274.99 275.47 275.95 276.43 276.91 277.39
272.92 272.92 273.22 273.94 274.50 274.98 275.46 275.94 276.42 276.90 277.38
272.92 272.92 273.21 273.93 274.49 274.97 275.45 275.94 276.42 276.90 277.38
272.93 272.93 273.22 273.93 274.50 274.98 275.46 275.94 276.42 276.90 277.38
272.93 272.93 273.22 273.94 274.50 274.98 275.46 275.94 276.42 276.90 277.38
273.00 273.00 273.24 273.93 274.49 274.97 275.45 275.93 276.42 276.90 277.38
273.66 273.66 273.56 273.94 274.49 274.97 275.45 275.93 276.41 276.90 277.38
274.98 274.98 274.04 274.01 274.52 275.00 275.48 275.96 276.44 276.92 277.40
276.60 276.60 274.89 274.20 274.61 275.09 275.56 276.03 276.50 276.97 277.44
277.25 277.25 275.78 274.54 274.81 275.26 275.71 276.17 276.62 277.08 277.53
277.15 277.15 275.86 274.86 275.07 275.50 275.94 276.37 276.80 277.23 277.67
277.00 277.00 276.24 275.14 275.30 275.72 276.13 276.54 276.95 277.37 277.78
278.87 278.87 276.67 275.36 275.52 275.91 276.30 276.70 277.09 277.49 277.88
280.45 280.45 277.84 275.71 275.73 276.11 276.48 276.86 277.24 277.61 277.99
281.13 281.13 278.59 276.16 276.07 276.42 276.76 277.11 277.46 277.81 278.15
281.87 281.87 279.32 276.65 276.46 276.77 277.09 277.40 277.71 278.03 278.34
282.88 282.88 280.09 277.15 276.86 277.14 277.42 277.70 277.98 278.26 278.54
283.76 283.76 280.96 277.68 277.29 277.54 277.78 278.02 278.27 278.51 278.75
283.65 283.65 281.27 278.19 277.74 277.95 278.15 278.36 278.56 278.77 278.97
283.06 283.06 281.28 278.58 278.14 278.31 278.48 278.65 278.82 278.99 279.16
282.70 282.70 281.22 278.85 278.44 278.59 278.73 278.88 279.02 279.17 279.31
281.77 281.77 280.89 279.02 278.67 278.79 278.92 279.04 279.17 279.30 279.42
280.27 280.27 280.20 279.07 278.80 278.92 279.03 279.15 279.26 279.38 279.49
279.44 279.44 279.55 278.97 278.82 278.93 279.05 279.16 279.27 279.39 279.50
279.58 279.58 279.36 278.82 278.76 278.88 278.99 279.11 279.23 279.35 279.47
279.52 279.52 279.18 278.71 278.68 278.81 278.93 279.06 279.18 279.31 279.43
280.03 280.03 279.26 278.53 278.47 278.61 278.76 278.90 279.04 279.18 279.33
280.67 280.67 279.56 278.54 278.45 278.59 278.74 278.88 279.03 279.17 279.32
281.43 281.43 279.97 278.63 278.49 278.63 278.77 278.91 279.05 279.20 279.34
282.17 282.17 280.45 278.78 278.58 278.72 278.85 278.98 279.12 279.25 279.38
282.84 282.84 281.03 278.99 278.73 278.85 278.97 279.09 279.21 279.33 279.45
283.10 283.10 281.37 279.25 278.92 279.03 279.13 279.23 279.34 279.44 279.55
283.75 283.75 281.88 279.52 279.14 279.22 279.31 279.40 279.48 279.57 279.65
284.08 284.08 282.28 279.81 279.38 279.44 279.51 279.57 279.64 279.71 279.77
283.69 283.69 282.31 280.07 279.61 279.66 279.70 279.75 279.79 279.84 279.89
282.86 282.86 282.06 280.23 279.80 279.83 279.86 279.89 279.92 279.95 279.98
282.71 282.71 281.81 280.28 279.91 279.93 279.95 279.97 279.99 280.01 280.03
282.79 282.79 281.81 280.30 279.96 279.98 280.00 280.01 280.03 280.04 280.06
282.57 282.57 281.76 280.37 280.05 280.06 280.07 280.08 280.08 280.09 280.10
282.62 282.62 281.72 280.39 280.07 280.08 280.08 280.09 280.10 280.10 280.11
282.31 282.31 281.70 280.42 280.11 280.11 280.12 280.12 280.12 280.13 280.13
282.61 282.61 281.65 280.43 280.14 280.15 280.15 280.15 280.15 280.15 280.15
282.98 282.98 281.96 280.48 280.18 280.18 280.18 280.17 280.17 280.17 280.17
282.76 282.76 281.90 280.56 280.26 280.25 280.24 280.23 280.22 280.21 280.20
283.26 283.26 282.15 280.64 280.33 280.31 280.30 280.28 280.27 280.25 280.24
282.81 282.81 282.05 280.74 280.41 280.39 280.37 280.34 280.32 280.30 280.28
282.85 282.85 282.08 280.79 280.48 280.45 280.42 280.39 280.36 280.34 280.31
282.57 282.57 281.98 280.83 280.52 280.49 280.46 280.43 280.39 280.36 280.33
282.45 282.45 281.90 280.84 280.56 280.53 280.49 280.46 280.42 280.39 280.35
282.50 282.50 281.81 280.85 280.59 280.55 280.51 280.47 280.44 280.40 280.36
282.88 282.88 282.06 280.87 280.60 280.56 280.52 280.48 280.45 280.41 280.37
282.56 282.56 281.95 280.92 280.64 280.60 280.56 280.52 280.47 280.43 280.39
282.80 282.80 281.98 280.94 280.67 280.63 280.58 280.54 280.49 280.45 280.40
284.79 284.79 282.73 281.01 280.71 280.66 280.61 280.57 280.52 280.47 280.42
285.85 285.85 283.75 281.28 280.84 280.79 280.73 280.67 280.61 280.55 280.49
285.24 285.24 283.88 281.62 281.10 281.02 280.94 280.86 280.78 280.70 280.61
285.56 285.56 284.05 281.86 281.33 281.23 281.13 281.03 280.93 280.83 280.73
285.45 285.45 284.16 282.06 281.52 281.41 281.29 281.17 281.05 280.94 280.82
285.35 285.35 284.11 282.21 281.69 281.56 281.42 281.29 281.16 281.03 280.90
285.74 285.74 284.26 282.34 281.81 281.67 281.53 281.39 281.25 281.11 280.96
286.33 286.33 284.60 282.49 281.95 281.79 281.64 281.49 281.33 281.18 281.03
286.54 286.54 284.87 282.69 282.10 281.94 281.77 281.60 281.44 281.27 281.11
286.75 286.75 285.02 282.88 282.28 282.10 281.92 281.74 281.55 281.37 281.19
287.11 287.11 285.23 283.06 282.44 282.25 282.05 281.86 281.66 281.47 281.27
287.15 287.15 285.41 283.24 282.62 282.41 282.20 281.99 281.78 281.57 281.36
286.44 286.44 285.43 283.63 283.06 282.81 282.57 282.32 282.07 281.82 281.57
285.21 285.21 284.98 283.72 283.19 282.93 282.67 282.42 282.16 281.90 281.64
285.09 285.09 284.67 283.68 283.23 282.96 282.70 282.44 282.18 281.92 281.66
285.25 285.25 284.58 283.60 283.18 282.92 282.66 282.41 282.15 281.89 281.63
285.50 285.50 284.60 283.55 283.14 282.88 282.63 282.38 282.12 281.87 281.61
285.65 285.65 284.68 283.54 283.13 282.87 282.62 282.37 282.11 281.86 281.61
285.86 285.86 284.78 283.58 283.15 282.90 282.64 282.38 282.13 281.87 281.62
286.02 286.02 284.94 283.65 283.20 282.94 282.68 282.42 282.16 281.90 281.64
286.02 286.02 285.01 283.73 283.27 283.00 282.74 282.47 282.21 281.94 281.68
285.79 285.79 284.97 283.78 283.32 283.05 282.78 282.51 282.24 281.97 281.70
285.81 285.81 285.00 283.82 283.36 283.09 282.81 282.54 282.27 281.99 281.72
285.70 285.70 284.97 283.88 283.42 283.14 282.87 282.59 282.31 282.03 281.75
285.81 285.81 284.99 283.89 283.44 283.16 282.88 282.60 282.32 282.04 281.76
285.95 285.95 285.03 283.91 283.46 283.18 282.90 282.62 282.33 282.05 281.77
286.18 286.18 285.13 283.93 283.47 283.19 282.91 282.62 282.34 282.06 281.78
286.52 286.52 285.26 283.98 283.51 283.23 282.94 282.65 282.37 282.08 281.80
287.02 287.02 285.48 284.06 283.57 283.27 282.98 282.69 282.40 282.11 281.82
287.49 287.49 285.78 284.17 283.64 283.34 283.04 282.75 282.45 282.15 281.86
288.01 288.01 286.08 284.33 283.76 283.45 283.14 282.84 282.53 282.22 281.92
288.49 288.49 286.47 284.54 283.92 283.60 283.28 282.96 282.64 282.32 281.99
288.35 288.35 286.68 284.72 284.05 283.72 283.39 283.06 282.72 282.39 282.06
287.11 287.11 286.44 284.83 284.15 283.81 283.47 283.13 282.79 282.45 282.11
286.83 286.83 286.13 284.86 284.24 283.89 283.54 283.20 282.85 282.50 282.15
287.38 287.38 286.15 284.85 284.27 283.92 283.57 283.22 282.87 282.52 282.17
287.85 287.85 286.35 284.88 284.30 283.94 283.59 283.24 282.88 282.53 282.18
288.18 288.18 286.53 284.96 284.36 284.00 283.64 283.28 282.93 282.57 282.21
288.63 288.63 286.79 285.07 284.44 284.07 283.71 283.34 282.98 282.61 282.25
288.67 288.67 286.97 285.25 284.61 284.23 283.85 283.47 283.09 282.71 282.33
288.75 288.75 287.11 285.45 284.82 284.42 284.03 283.63 283.23 282.83 282.44
288.48 288.48 287.25 285.66 285.01 284.60 284.18 283.77 283.35 282.94 282.53
287.84 287.84 287.08 285.69 285.03 284.61 284.20 283.78 283.37 282.95 282.54
287.36 287.36 286.79 285.61 284.97 284.56 284.15 283.74 283.33 282.92 282.51
287.36 287.36 286.63 285.54 284.94 284.54 284.13 283.72 283.31 282.90 282.50
287.54 287.54 286.61 285.51 284.94 284.53 284.12 283.71 283.31 282.90 282.49
287.59 287.59 286.63 285.49 284.91 284.50 284.10 283.69 283.29 282.88 282.48
287.88 287.88 286.68 285.47 284.89 284.48 284.08 283.68 283.28 282.87 282.47
287.87 287.87 286.76 285.49 284.90 284.49 284.09 283.69 283.28 282.88 282.47
287.97 287.97 286.78 285.52 284.92 284.52 284.11 283.70 283.30 282.89 282.48
288.52 288.52 287.01 285.63 285.02 284.61 284.19 283.78 283.36 282.95 282.53
289.10 289.10 287.30 285.71 285.05 284.63 284.22 283.80 283.38 282.97 282.55
289.52 289.52 287.57 285.81 285.12 284.69 284.27 283.85 283.43 283.00 282.58
289.30 289.30 287.73 285.94 285.21 284.78 284.35 283.92 283.49 283.06 282.63
288.53 288.53 287.54 286.03 285.32 284.88 284.44 284.00 283.56 283.12 282.68
288.60 288.60 287.44 286.06 285.38 284.94 284.49 284.05 283.60 283.16 282.71
289.01 289.01 287.54 286.08 285.42 284.97 284.52 284.07 283.62 283.17 282.73
289.34 289.34 287.68 286.13 285.45 285.00 284.55 284.10 283.65 283.20 282.75
289.43 289.43 287.81 286.20 285.51 285.05 284.60 284.14 283.68 283.23 282.77
289.24 289.24 287.85 286.27 285.57 285.11 284.65 284.19 283.72 283.26 282.80
288.66 288.66 287.67 286.31 285.62 285.15 284.69 284.22 283.76 283.29 282.83
287.93 287.93 287.41 286.29 285.64 285.18 284.71 284.24 283.77 283.31 282.84
287.36 287.36 287.05 286.22 285.62 285.16 284.69 284.22 283.76 283.29 282.83
287.44 287.44 286.87 286.11 285.55 285.09 284.63 284.17 283.71 283.25 282.79
287.74 287.74 286.86 286.06 285.54 285.08 284.62 284.16 283.70 283.25 282.79
288.24 288.24 287.07 286.05 285.50 285.05 284.59 284.14 283.68 283.22 282.77
288.09 288.09 287.12 286.05 285.49 285.03 284.58 284.12 283.67 283.22 282.76
288.53 288.53 287.24 286.13 285.54 285.08 284.63 284.17 283.71 283.25 282.79
288.49 288.49 287.42 286.22 285.60 285.14 284.67 284.21 283.74 283.28 282.82
287.77 287.77 287.25 286.23 285.62 285.15 284.69 284.22 283.76 283.29 282.83
287.48 287.48 287.05 286.20 285.61 285.15 284.68 284.22 283.75 283.29 282.82
287.03 287.03 286.80 286.13 285.58 285.12 284.66 284.20 283.73 283.27 282.81
287.09 287.09 286.64 286.03 285.52 285.06 284.60 284.15 283.69 283.23 282.78
286.92 286.92 286.51 285.94 285.44 284.99 284.54 284.09 283.64 283.19 282.74
286.88 286.88 286.38 285.84 285.36 284.91 284.47 284.03 283.58 283.14 282.70
287.04 287.04 286.37 285.75 285.28 284.84 284.41 283.97 283.53 283.10 282.66
287.49 287.49 286.45 285.70 285.21 284.78 284.35 283.92 283.49 283.06 282.63
287.75 287.75 286.63 285.72 285.21 284.78 284.35 283.92 283.49 283.06 282.63
287.80 287.80 286.82 285.82 285.27 284.84 284.40 283.96 283.53 283.09 282.66
287.39 287.39 286.72 285.85 285.29 284.86 284.42 283.98 283.54 283.10 282.67
287.21 287.21 286.64 285.84 285.30 284.86 284.43 283.99 283.55 283.11 282.67
286.80 286.80 286.46 285.81 285.29 284.85 284.42 283.98 283.54 283.10 282.67
287.12 287.12 286.40 285.75 285.25 284.82 284.38 283.95 283.51 283.08 282.65
287.31 287.31 286.49 285.72 285.22 284.79 284.36 283.93 283.49 283.06 282.63
287.38 287.38 286.53 285.73 285.21 284.78 284.35 283.92 283.49 283.06 282.63
287.25 287.25 286.53 285.74 285.22 284.79 284.36 283.93 283.49 283.06 282.63
287.43 287.43 286.54 285.74 285.22 284.79 284.36 283.93 283.49 283.06 282.63
288.17 288.17 286.74 285.75 285.23 284.79 284.36 283.93 283.50 283.07 282.63
288.24 288.24 286.97 285.82 285.26 284.83 284.39 283.96 283.52 283.09 282.65
287.47 287.47 286.89 285.90 285.32 284.88 284.44 284.00 283.56 283.12 282.68
287.01 287.01 286.65 285.91 285.36 284.91 284.47 284.03 283.58 283.14 282.70
286.92 286.92 286.54 285.87 285.35 284.91 284.47 284.02 283.58 283.14 282.70
286.70 286.70 286.44 285.85 285.35 284.91 284.46 284.02 283.58 283.14 282.69
286.73 286.73 286.37 285.81 285.32 284.88 284.44 284.00 283.56 283.12 282.68
286.63 286.63 286.32 285.76 285.28 284.84 284.41 283.97 283.53 283.10 282.66
286.60 286.60 286.24 285.72 285.24 284.81 284.37 283.94 283.51 283.07 282.64
286.68 286.68 286.20 285.67 285.20 284.77 284.34 283.91 283.48 283.05 282.62
286.57 286.57 286.19 285.64 285.17 284.75 284.32 283.89 283.46 283.04 282.61
286.26 286.26 286.05 285.61 285.15 284.72 284.30 283.87 283.45 283.02 282.60
286.32 286.32 285.98 285.56 285.11 284.69 284.27 283.85 283.42 283.00 282.58
286.36 286.36 285.97 285.51 285.07 284.65 284.23 283.81 283.39 282.97 282.56
286.14 286.14 285.91 285.48 285.04 284.62 284.21 283.79 283.37 282.96 282.54
285.98 285.98 285.79 285.43 285.01 284.59 284.18 283.77 283.35 282.94 282.53
285.82 285.82 285.70 285.38 284.96 284.55 284.15 283.74 283.33 282.92 282.51
285.84 285.84 285.62 285.32 284.92 284.51 284.11 283.70 283.30 282.89 282.48
285.60 285.60 285.53 285.28 284.88 284.47 284.07 283.67 283.27 282.87 282.46
286.20 286.20 285.62 285.23 284.84 284.44 284.04 283.64 283.24 282.84 282.44
285.67 285.67 285.62 285.23 284.81 284.41 284.02 283.62 283.22 282.83 282.43
285.48 285.48 285.42 285.20 284.80 284.41 284.01 283.61 283.22 282.82 282.43
284.73 284.73 285.13 285.13 284.76 284.37 283.98 283.58 283.19 282.80 282.41
284.32 284.32 284.77 285.00 284.68 284.29 283.91 283.52 283.14 282.75 282.37
284.81 284.81 284.72 284.84 284.56 284.18 283.81 283.43 283.06 282.68 282.31
285.25 285.25 284.96 284.78 284.47 284.10 283.73 283.36 283.00 282.63 282.26
284.98 284.98 284.99 284.78 284.44 284.07 283.71 283.34 282.98 282.61 282.25
283.89 283.89 284.49 284.74 284.42 284.06 283.70 283.33 282.97 282.60 282.24
282.85 282.85 283.92 284.59 284.34 283.98 283.63 283.27 282.91 282.56 282.20
282.56 282.56 283.43 284.34 284.18 283.84 283.50 283.15 282.81 282.47 282.12
281.91 281.91 282.98 284.08 283.98 283.66 283.33 283.01 282.68 282.35 282.03
283.21 283.21 283.21 283.85 283.78 283.47 283.16 282.85 282.54 282.23 281.92
282.45 282.45 283.12 283.76 283.64 283.34 283.05 282.75 282.45 282.16 281.86
282.10 282.10 282.79 283.63 283.54 283.25 282.96 282.67 282.38 282.10 281.81
283.51 283.51 283.12 283.49 283.40 283.13 282.85 282.57 282.30 282.02 281.74
282.71 282.71 283.16 283.49 283.34 283.07 282.80 282.53 282.25 281.98 281.71
281.39 281.39 282.53 283.41 283.31 283.04 282.77 282.50 282.23 281.97 281.70
282.14 282.14 282.49 283.23 283.18 282.92 282.67 282.41 282.15 281.89 281.63
281.30 281.30 282.19 283.10 283.05 282.81 282.56 282.31 282.07 281.82 281.57
281.57 281.57 282.11 282.95 282.93 282.69 282.46 282.22 281.98 281.75 281.51
281.38 281.38 281.98 282.82 282.81 282.58 282.36 282.13 281.90 281.68 281.45
282.03 282.03 282.20 282.73 282.70 282.48 282.27 282.05 281.83 281.62 281.40
281.28 281.28 281.92 282.67 282.63 282.42 282.21 282.00 281.79 281.58 281.37
279.87 279.87 281.30 282.54 282.55 282.35 282.14 281.94 281.73 281.53 281.33
279.82 279.82 280.88 282.29 282.39 282.20 282.01 281.82 281.63 281.44 281.25
280.27 280.27 280.93 282.08 282.20 282.02 281.85 281.67 281.50 281.33 281.15
278.94 278.94 280.40 281.92 282.05 281.88 281.72 281.56 281.40 281.24 281.08
279.14 279.14 280.21 281.70 281.88 281.73 281.58 281.44 281.29 281.14 280.99
278.28 278.28 279.78 281.49 281.70 281.57 281.44 281.30 281.17 281.04 280.91
277.82 277.82 279.28 281.23 281.50 281.38 281.27 281.15 281.04 280.92 280.81
278.23 278.23 279.21 280.97 281.27 281.17 281.08 280.98 280.89 280.79 280.70
278.79 278.79 279.40 280.80 281.08 281.00 280.92 280.84 280.77 280.69 280.61
279.15 279.15 279.58 280.73 280.97 280.90 280.83 280.76 280.69 280.62 280.55
279.15 279.15 279.68 280.70 280.90 280.84 280.77 280.71 280.65 280.58 280.52
279.10 279.10 279.66 280.67 280.86 280.80 280.74 280.68 280.62 280.56 280.50
278.31 278.31 279.38 280.62 280.81 280.75 280.70 280.64 280.59 280.53 280.47
277.85 277.85 278.98 280.48 280.72 280.67 280.63 280.58 280.53 280.48 280.43
277.66 277.66 278.81 280.32 280.59 280.55 280.52 280.48 280.44 280.40 280.37
278.15 278.15 278.78 280.16 280.45 280.43 280.40 280.37 280.35 280.32 280.30
278.17 278.17 278.84 280.06 280.34 280.32 280.30 280.29 280.27 280.26 280.24
278.33 278.33 278.87 280.00 280.26 280.25 280.24 280.23 280.22 280.21 280.20
278.46 278.46 278.96 279.96 280.20 280.20 280.19 280.19 280.18 280.18 280.17
278.71 278.71 279.04 279.94 280.16 280.16 280.16 280.16 280.16 280.16 280.16
278.95 278.95 279.22 279.94 280.14 280.14 280.14 280.14 280.14 280.14 280.14
278.66 278.66 279.15 279.96 280.14 280.14 280.14 280.14 280.14 280.14 280.14
279.21 279.21 279.31 279.95 280.13 280.13 280.13 280.13 280.14 280.14 280.14
278.71 278.71 279.27 279.98 280.13 280.13 280.13 280.13 280.14 280.14 280.14
279.53 279.53 279.42 279.97 280.12 280.12 280.13 280.13 280.13 280.13 280.14
279.78 279.78 279.72 280.02 280.13 280.13 280.13 280.14 280.14 280.14 280.14
279.84 279.84 279.84 280.10 280.18 280.18 280.18 280.17 280.17 280.17 280.17
279.77 279.77 279.87 280.16 280.23 280.22 280.22 280.21 280.20 280.20 280.19
279.65 279.65 279.85 280.20 280.27 280.26 280.25 280.24 280.23 280.22 280.21
279.40 279.40 279.74 280.21 280.29 280.28 280.26 280.25 280.24 280.23 280.22
279.30 279.30 279.66 280.19 280.28 280.27 280.26 280.25 280.24 280.23 280.22
278.58 278.58 279.43 280.16 280.27 280.26 280.25 280.24 280.23 280.22 280.21
277.69 277.69 278.93 280.05 280.21 280.21 280.20 280.20 280.19 280.19 280.18
277.77 277.77 278.61 279.87 280.10 280.10 280.11 280.11 280.12 280.12 280.12
277.96 277.96 278.63 279.71 279.96 279.97 279.99 280.01 280.02 280.04 280.06
277.72 277.72 278.50 279.60 279.85 279.87 279.90 279.93 279.95 279.98 280.00
277.50 277.50 278.32 279.49 279.75 279.79 279.82 279.85 279.89 279.92 279.96
277.14 277.14 278.17 279.38 279.65 279.69 279.73 279.78 279.82 279.86 279.90
276.24 276.24 277.68 279.24 279.55 279.60 279.65 279.70 279.75 279.80 279.85
276.07 276.07 277.33 279.03 279.40 279.46 279.53 279.59 279.65 279.72 279.78
276.41 276.41 277.27 278.83 279.22 279.30 279.38 279.46 279.54 279.62 279.70
276.64 276.64 277.34 278.68 279.07 279.16 279.25 279.35 279.44 279.53 279.62
276.12 276.12 277.18 278.58 278.96 279.06 279.16 279.26 279.36 279.46 279.57
275.07 275.07 276.62 278.44 278.86 278.97 279.08 279.19 279.30 279.41 279.52
274.75 274.75 276.21 278.22 278.70 278.82 278.95 279.07 279.19 279.32 279.44
274.77 274.77 276.05 278.00 278.51 278.65 278.79 278.93 279.07 279.21 279.35
274.98 274.98 276.01 277.82 278.33 278.49 278.64 278.80 278.95 279.11 279.26
275.38 275.38 276.12 277.69 278.19 278.36 278.53 278.69 278.86 279.03 279.19
275.81 275.81 276.32 277.62 278.09 278.26 278.44 278.61 278.79 278.96 279.14
274.90 274.90 276.04 277.57 278.03 278.21 278.39 278.57 278.75 278.93 279.11
274.45 274.45 275.72 277.46 277.95 278.14 278.33 278.51 278.70 278.89 279.07
274.02 274.02 275.38 277.29 277.83 278.03 278.22 278.42 278.62 278.82 279.01
274.47 274.47 275.31 277.11 277.68 277.89 278.10 278.31 278.52 278.73 278.94
274.71 274.71 275.49 277.01 277.55 277.77 277.99 278.21 278.44 278.66 278.88
275.16 275.16 275.64 276.97 277.48 277.71 277.93 278.16 278.39 278.62 278.84
274.38 274.38 275.49 276.95 277.44 277.67 277.90 278.13 278.36 278.59 278.82
274.10 274.10 275.17 276.86 277.39 277.62 277.86 278.09 278.33 278.56 278.80
273.95 273.95 275.06 276.75 277.29 277.54 277.78 278.02 278.27 278.51 278.75
273.60 273.60 274.81 276.63 277.20 277.45 277.70 277.95 278.20 278.45 278.71
273.52 273.52 274.66 276.49 277.09 277.35 277.61 277.87 278.13 278.39 278.65
273.54 273.54 274.59 276.38 276.98 277.25 277.52 277.79 278.06 278.33 278.60
273.50 273.50 274.53 276.28 276.88 277.16 277.44 277.72 277.99 278.27 278.55
273.47 273.47 274.47 276.20 276.80 277.09 277.37 277.66 277.94 278.23 278.51
273.40 273.40 274.40 276.12 276.72 277.02 277.31 277.60 277.89 278.18 278.47
273.38 273.38 274.35 276.04 276.64 276.94 277.24 277.54 277.84 278.13 278.43
273.37 273.37 274.32 275.97 276.57 276.88 277.18 277.49 277.79 278.10 278.40
273.35 273.35 274.28 275.90 276.50 276.81 277.12 277.43 277.74 278.06 278.37
273.29 273.29 274.22 275.83 276.43 276.75 277.07 277.38 277.70 278.02 278.33
273.25 273.25 274.17 275.76 276.37 276.69 277.01 277.33 277.65 277.98 278.30
273.24 273.24 274.13 275.70 276.31 276.63 276.96 277.29 277.61 277.94 278.27
273.24 273.24 274.10 275.65 276.25 276.58 276.92 277.25 277.58 277.91 278.24
273.24 273.24 274.08 275.59 276.20 276.53 276.87 277.21 277.54 277.88 278.22
273.24 273.24 274.06 275.55 276.15 276.49 276.83 277.17 277.51 277.85 278.19
273.25 273.25 274.04 275.50 276.10 276.45 276.79 277.13 277.48 277.82 278.17
273.28 273.28 274.04 275.46 276.06 276.40 276.75 277.10 277.45 277.80 278.15
273.29 273.29 274.03 275.43 276.02 276.37 276.72 277.07 277.42 277.78 278.13
273.25 273.25 274.01 275.38 275.97 276.33 276.68 277.04 277.39 277.75 278.11
273.27 273.27 273.99 275.35 275.94 276.30 276.66 277.01 277.37 277.73 278.09
273.09 273.09 273.89 275.30 275.89 276.25 276.62 276.98 277.34 277.70 278.07
273.04 273.04 273.82 275.26 275.85 276.22 276.58 276.95 277.32 277.68 278.05
273.11 273.11 273.84 275.22 275.81 276.18 276.55 276.92 277.29 277.66 278.03
273.19 273.19 273.89 275.20 275.79 276.16 276.53 276.90 277.27 277.64 278.01
273.09 273.09 273.84 275.17 275.76 276.13 276.51 276.88 277.25 277.63 278.00
273.09 273.09 273.84 275.17 275.76 276.13 276.51 276.88 277.25 277.63 278.00
272.95 272.95 273.68 274.88 275.45 275.85 276.25 276.65 277.05 277.45 277.85
272.95 272.95 273.68 274.88 275.45 275.85 276.25 276.65 277.05 277.45 277.85
272.95 272.95 273.68 274.88 275.45 275.85 276.25 276.65 277.05 277.45 277.85
272.95 272.95 273.65 274.82 275.41 275.81 276.21 276.62 277.02 277.43 277.83
272.95 272.95 273.65 274.78 275.36 275.76 276.17 276.58 276.99 277.40 277.80
272.95 272.95 273.65 274.78 275.36 275.76 276.17 276.58 276.99 277.40 277.80
272.95 272.95 273.65 274.78 275.36 275.76 276.17 276.58 276.99 277.40 277.80
272.95 272.95 273.65 274.77 275.33 275.74 276.15 276.56 276.97 277.38 277.79
272.95 272.95 273.65 274.72 275.26 275.68 276.09 276.51 276.93 277.34 277.76
272.95 272.95 273.65 274.72 275.26 275.68 276.09 276.51 276.93 277.34 277.76
272.95 272.95 273.64 274.70 275.26 275.68 276.09 276.51 276.93 277.34 277.76
272.95 272.95 273.56 274.68 275.26 275.68 276.09 276.51 276.93 277.34 277.76
272.92 272.92 273.55 274.62 275.18 275.60 276.02 276.45 276.87 277.29 277.72
272.90 272.90 273.55 274.62 275.17 275.59 276.02 276.44 276.86 277.29 277.71
272.92 272.92 273.55 274.62 275.17 275.59 276.02 276.44 276.86 277.29 277.71
272.95 272.95 273.55 274.62 275.17 275.59 276.02 276.44 276.86 277.29 277.71
272.88 272.88 273.53 274.57 275.13 275.56 275.99 276.41 276.84 277.27 277.69
272.85 272.85 273.52 274.52 275.07 275.51 275.94 276.37 276.80 277.23 277.67
272.85 272.85 273.52 274.52 275.07 275.51 275.94 276.37 276.80 277.23 277.67
272.86 272.86 273.52 274.52 275.07 275.51 275.94 276.37 276.80 277.23 277.67
272.85 272.85 273.53 274.52 275.07 275.51 275.94 276.37 276.80 277.23 277.67
272.85 272.85 273.58 274.51 275.07 275.50 275.93 276.37 276.80 277.23 277.66
272.88 272.88 273.58 274.48 275.02 275.46 275.89 276.33 276.77 277.20 277.64
272.95 272.95 273.58 274.52 275.07 275.51 275.94 276.37 276.80 277.23 277.67
272.95 272.95 273.58 274.52 275.07 275.51 275.94 276.37 276.80 277.23 277.67
272.95 272.95 273.58 274.49 275.04 275.48 275.91 276.35 276.78 277.22 277.65
272.95 272.95 273.58 274.45 274.98 275.42 275.86 276.30 276.74 277.18 277.62
272.95 272.95 273.57 274.45 274.98 275.42 275.86 276.30 276.74 277.18 277.62
272.95 272.95 273.52 274.45 274.98 275.42 275.86 276.30 276.74 277.18 277.62
272.95 272.95 273.52 274.45 274.98 275.42 275.86 276.30 276.74 277.18 277.62
272.90 272.90 273.49 274.42 274.98 275.42 275.86 276.30 276.74 277.18 277.62
272.95 272.95 273.49 274.42 274.98 275.42 275.86 276.30 276.74 277.18 277.62
272.91 272.91 273.48 274.38 274.93 275.38 275.82 276.26 276.71 277.15 277.60
272.85 272.85 273.48 274.35 274.89 275.33 275.78 276.23 276.68 277.13 277.57
272.85 272.85 273.48 274.35 274.89 275.33 275.78 276.23 276.68 277.13 277.57
272.85 272.85 273.48 274.35 274.89 275.33 275.78 276.23 276.68 277.13 277.57
272.85 272.85 273.48 274.35 274.88 275.33 275.78 276.23 276.68 277.12 277.57
272.85 272.85 273.48 274.32 274.84 275.29 275.74 276.19 276.65 277.10 277.55
272.85 272.85 273.48 274.28 274.79 275.25 275.70 276.16 276.62 277.07 277.53
272.85 272.85 273.48 274.28 274.79 275.25 275.70 276.16 276.62 277.07 277.53
272.85 272.85 273.48 274.28 274.79 275.25 275.70 276.16 276.62 277.07 277.53
272.86 272.86 273.48 274.28 274.79 275.25 275.70 276.16 276.62 277.07 277.53
272.95 272.95 273.48 274.28 274.79 275.25 275.70 276.16 276.62 277.07 277.53
272.95 272.95 273.48 274.28 274.79 275.25 275.70 276.16 276.62 277.07 277.53
272.95 272.95 273.48 274.28 274.79 275.25 275.70 276.16 276.62 277.07 277.53
272.95 272.95 273.48 274.28 274.79 275.25 275.70 276.16 276.62 277.07 277.53
272.93 272.93 273.45 274.25 274.79 275.25 275.70 276.16 276.62 277.07 277.53
272.85 272.85 273.45 274.19 274.71 275.17 275.64 276.10 276.56 277.03 277.49
272.85 272.85 273.45 274.18 274.70 275.16 275.63 276.09 276.55 277.02 277.48
272.94 272.94 273.45 274.23 274.77 275.23 275.68 276.14 276.60 277.06 277.52
272.95 272.95 273.45 274.23 274.77 275.23 275.68 276.14 276.60 277.06 277.52
272.95 272.95 273.45 274.20 274.72 275.18 275.64 276.11 276.57 277.03 277.49
272.95 272.95 273.45 274.18 274.70 275.16 275.63 276.09 276.55 277.02 277.48
272.95 272.95 273.45 274.18 274.70 275.16 275.63 276.09 276.55 277.02 277.48
272.95 272.95 273.45 274.18 274.70 275.16 275.63 276.09 276.55 277.02 277.48
272.94 272.94 273.45 274.18 274.70 275.16 275.63 276.09 276.55 277.02 277.48
272.85 272.85 273.45 274.18 274.69 275.16 275.62 276.09 276.55 277.02 277.48
272.85 272.85 273.44 274.14 274.64 275.11 275.58 276.05 276.52 276.99 277.46
272.85 272.85 273.43 274.10 274.61 275.08 275.55 276.02 276.49 276.97 277.44
272.95 272.95 273.38 274.24 274.81 275.27 275.72 276.18 276.63 277.08 277.54
272.95 272.95 273.38 274.23 274.80 275.25 275.71 276.16 276.62 277.08 277.53
272.95 272.95 273.37 274.21 274.78 275.23 275.69 276.15 276.61 277.06 277.52
272.95 272.95 273.37 274.19 274.76 275.21 275.67 276.13 276.59 277.05 277.51
272.95 272.95 273.37 274.18 274.73 275.19 275.65 276.12 276.58 277.04 277.50
272.95 272.95 273.37 274.16 274.71 275.17 275.64 276.10 276.56 277.03 277.49
272.96 272.96 273.37 274.14 274.69 275.16 275.62 276.09 276.55 277.01 277.48
272.97 272.97 273.37 274.13 274.67 275.14 275.61 276.07 276.54 277.00 277.47
272.96 272.96 273.36 274.11 274.65 275.12 275.59 276.05 276.52 276.99 277.46
272.97 272.97 273.37 274.10 274.64 275.11 275.57 276.04 276.51 276.98 277.45
272.97 272.97 273.37 274.09 274.62 275.09 275.56 276.03 276.50 276.97 277.44
272.97 272.97 273.36 274.08 274.61 275.08 275.56 276.03 276.50 276.97 277.44
272.97 272.97 273.36 274.08 274.61 275.08 275.55 276.02 276.50 276.97 277.44
272.97 272.97 273.36 274.18 274.75 275.21 275.67 276.13 276.59 277.05 277.51
272.97 272.97 273.36 274.18 274.75 275.21 275.67 276.13 276.59 277.05 277.51
272.98 272.98 273.36 274.18 274.75 275.21 275.67 276.13 276.59 277.05 277.51
272.95 272.95 273.36 274.17 274.74 275.20 275.66 276.12 276.58 277.04 277.50
272.95 272.95 273.36 274.16 274.73 275.19 275.65 276.12 276.58 277.04 277.50
272.95 272.95 273.36 274.15 274.72 275.18 275.65 276.11 276.57 277.03 277.49
272.95 272.95 273.35 274.14 274.71 275.17 275.64 276.10 276.56 277.03 277.49
272.95 272.95 273.35 274.13 274.70 275.17 275.63 276.09 276.56 277.02 277.48
272.95 272.95 273.35 274.12 274.69 275.16 275.62 276.09 276.55 277.01 277.48
272.95 272.95 273.34 274.11 274.68 275.15 275.61 276.08 276.54 277.01 277.47
272.95 272.95 273.34 274.10 274.67 275.14 275.60 276.07 276.54 277.00 277.47
272.95 272.95 273.34 274.09 274.66 275.13 275.60 276.06 276.53 277.00 277.46
272.95 272.95 273.33 274.08 274.65 275.12 275.59 276.06 276.52 276.99 277.46
272.95 272.95 273.33 274.07 274.64 275.11 275.58 276.05 276.52 276.99 277.45
272.95 272.95 273.33 274.06 274.63 275.10 275.57 276.04 276.51 276.98 277.45
272.95 272.95 273.33 274.05 274.62 275.09 275.56 276.03 276.50 276.97 277.44
272.95 272.95 273.32 274.04 274.61 275.08 275.55 276.03 276.50 276.97 277.44
272.95 272.95 273.32 274.03 274.60 275.07 275.55 276.02 276.49 276.96 277.43
272.95 272.95 273.32 274.02 274.59 275.06 275.54 276.01 276.48 276.96 277.43
272.95 272.95 273.31 274.01 274.58 275.05 275.53 276.00 276.48 276.95 277.42
272.95 272.95 273.31 274.00 274.57 275.05 275.52 276.00 276.47 276.94 277.42
272.95 272.95 273.31 273.99 274.56 275.04 275.51 275.99 276.46 276.94 277.41
272.95 272.95 273.31 273.98 274.55 275.03 275.50 275.98 276.46 276.93 277.41
272.95 272.95 273.30 273.97 274.54 275.02 275.50 275.97 276.45 276.93 277.40
272.92 272.92 273.23 273.97 274.53 275.01 275.49 275.97 276.44 276.92 277.40
272.92 272.92 273.22 273.96 274.52 275.00 275.48 275.96 276.44 276.91 277.39
272.92 272.92 273.22 273.95 274.51 274.99 275.47 275.95 276.43 276.91 277.39
272.92 272.92 273.22 273.94 274.50 274.98 275.46 275.94 276.42 276.90 277.38
272.92 272.92 273.21 273.93 274.49 274.97 275.45 275.94 276.42 276.90 277.38
272.93 272.93 273.22 273.93 274.50 274.98 275.46 275.94 276.42 276.90 277.38
272.93 272.93 273.22 273.94 274.50 274.98 275.46 275.94 276.42 276.90 277.38
273.00 273.00 273.24 273.93 274.49 274.97 275.45 275.93 276.42 276.90 277.38
273.66 273.66 273.56 273.94 274.49 274.97 275.45 275.93 276.41 276.90 277.38
274.98 274.98 274.04 274.01 274.52 275.00 275.48 275.96 276.44 276.92 277.40
276.60 276.60 274.89 274.20 274.61 275.09 275.56 276.03 276.50 276.97 277.44
277.25 277.25 275.78 274.54 274.81 275.26 275.71 276.17 276.62 277.08 277.53
277.15 277.15 275.86 274.86 275.07 275.50 275.94 276.37 276.80 277.23 277.67
277.00 277.00 276.24 275.14 275.30 275.72 276.13 276.54 276.95 277.37 277.78
278.87 278.87 276.67 275.36 275.52 275.91 276.30 276.70 277.09 277.49 277.88
280.45 280.45 277.84 275.71 275.73 276.11 276.48 276.86 277.24 277.61 277.99
281.13 281.13 278.59 276.16 276.07 276.42 276.76 277.11 277.46 277.81 278.15
281.87 281.87 279.32 276.65 276.46 276.77 277.09 277.40 277.71 278.03 278.34
282.88 282.88 280.09 277.15 276.86 277.14 277.42 277.70 277.98 278.26 278.54
283.76 283.76 280.96 277.68 277.29 277.54 277.78 278.02 278.27 278.51 278.75
283.65 283.65 281.27 278.19 277.74 277.95 278.15 278.36 278.56 278.77 278.97
283.06 283.06 281.28 278.58 278.14 278.31 278.48 278.65 278.82 278.99 279.16
282.70 282.70 281.22 278.85 278.44 278.59 278.73 278.88 279.02 279.17 279.31
281.77 281.77 280.89 279.02 278.67 278.79 278.92 279.04 279.17 279.30 279.42
280.27 280.27 280.20 279.07 278.80 278.92 279.03 279.15 279.26 279.38 279.49
279.44 279.44 279.55 278.97 278.82 278.93 279.05 279.16 279.27 279.39 279.50
279.58 279.58 279.36 278.82 278.76 278.88 278.99 279.11 279.23 279.35 279.47
279.52 279.52 279.18 278.71 278.68 278.81 278.93 279.06 279.18 279.31 279.43
280.03 280.03 279.26 278.53 278.47 278.61 278.76 278.90 279.04 279.18 279.33
280.67 280.67 279.56 278.54 278.45 278.59 278.74 278.88 279.03 279.17 279.32
281.43 281.43 279.97 278.63 278.49 278.63 278.77 278.91 279.05 279.20 279.34
282.17 282.17 280.45 278.78 278.58 278.72 278.85 278.98 279.12 279.25 279.38
282.84 282.84 281.03 278.99 278.73 278.85 278.97 279.09 279.21 279.33 279.45
283.10 283.10 281.37 279.25 278.92 279.03 279.13 279.23 279.34 279.44 279.55
283.75 283.75 281.88 279.52 279.14 279.22 279.31 279.40 279.48 279.57 279.65
284.08 284.08 282.28 279.81 279.38 279.44 279.51 279.57 279.64 279.71 279.77
283.69 283.69 282.31 280.07 279.61 279.66 279.70 279.75 279.79 279.84 279.89
282.86 282.86 282.06 280.23 279.80 279.83 279.86 279.89 279.92 279.95 279.98
282.71 282.71 281.81 280.28 279.91 279.93 279.95 279.97 279.99 280.01 280.03
282.79 282.79 281.81 280.30 279.96 279.98 280.00 280.01 280.03 280.04 280.06
282.57 282.57 281.76 280.37 280.05 280.06 280.07 280.08 280.08 280.09 280.10
282.62 282.62 281.72 280.39 280.07 280.08 280.08 280.09 280.10 280.10 280.11
282.31 282.31 281.70 280.42 280.11 280.11 280.12 280.12 280.12 280.13 280.13
282.61 282.61 281.65 280.43 280.14 280.15 280.15 280.15 280.15 280.15 280.15
282.98 282.98 281.96 280.48 280.18 280.18 280.18 280.17 280.17 280.17 280.17
282.76 282.76 281.90 280.56 280.26 280.25 280.24 280.23 280.22 280.21 280.20
283.26 283.26 282.15 280.64 280.33 280.31 280.30 280.28 280.27 280.25 280.24
282.81 282.81 282.05 280.74 280.41 280.39 280.37 280.34 280.32 280.30 280.28
282.85 282.85 282.08 280.79 280.48 280.45 280.42 280.39 280.36 280.34 280.31
282.57 282.57 281.98 280.83 280.52 280.49 280.46 280.43 280.39 280.36 280.33
282.45 282.45 281.90 280.84 280.56 280.53 280.49 280.46 280.42 280.39 280.35
282.50 282.50 281.81 280.85 280.59 280.55 280.51 280.47 280.44 280.40 280.36
282.88 282.88 282.06 280.87 280.60 280.56 280.52 280.48 280.45 280.41 280.37
282.56 282.56 281.95 280.92 280.64 280.60 280.56 280.52 280.47 280.43 280.39
282.80 282.80 281.98 280.94 280.67 280.63 280.58 280.54 280.49 280.45 280.40
284.79 284.79 282.73 281.01 280.71 280.66 280.61 280.57 280.52 280.47 280.42
285.85 285.85 283.75 281.28 280.84 280.79 280.73 280.67 280.61 280.55 280.49
285.24 285.24 283.88 281.62 281.10 281.02 280.94 280.86 280.78 280.70 280.61
285.56 285.56 284.05 281.86 281.33 281.23 281.13 281.03 280.93 280.83 280.73
285.45 285.45 284.16 282.06 281.52 281.41 281.29 281.17 281.05 280.94 280.82
285.35 285.35 284.11 282.21 281.69 281.56 281.42 281.29 281.16 281.03 280.90
285.74 285.74 284.26 282.34 281.81 281.67 281.53 281.39 281.25 281.11 280.96
286.33 286.33 284.60 282.49 281.95 281.79 281.64 281.49 281.33 281.18 281.03
286.54 286.54 284.87 282.69 282.10 281.94 281.77 281.60 281.44 281.27 281.11
286.75 286.75 285.02 282.88 282.28 282.10 281.92 281.74 281.55 281.37 281.19
287.11 287.11 285.23 283.06 282.44 282.25 282.05 281.86 281.66 281.47 281.27
287.15 287.15 285.41 283.24 282.62 282.41 282.20 281.99 281.78 281.57 281.36
286.44 286.44 285.43 283.63 283.06 282.81 282.57 282.32 282.07 281.82 281.57
285.21 285.21 284.98 283.72 283.19 282.93 282.67 282.42 282.16 281.90 281.64
285.09 285.09 284.67 283.68 283.23 282.96 282.70 282.44 282.18 281.92 281.66
285.25 285.25 284.58 283.60 283.18 282.92 282.66 282.41 282.15 281.89 281.63
285.50 285.50 284.60 283.55 283.14 282.88 282.63 282.38 282.12 281.87 281.61
285.65 285.65 284.68 283.54 283.13 282.87 282.62 282.37 282.11 281.86 281.61
285.86 285.86 284.78 283.58 283.15 282.90 282.64 282.38 282.13 281.87 281.62
286.02 286.02 284.94 283.65 283.20 282.94 282.68 282.42 282.16 281.90 281.64
286.02 286.02 285.01 283.73 283.27 283.00 282.74 282.47 282.21 281.94 281.68
285.79 285.79 284.97 283.78 283.32 283.05 282.78 282.51 282.24 281.97 281.70
285.81 285.81 285.00 283.82 283.36 283.09 282.81 282.54 282.27 281.99 281.72
285.70 285.70 284.97 283.88 283.42 283.14 282.87 282.59 282.31 282.03 281.75
285.81 285.81 284.99 283.89 283.44 283.16 282.88 282.60 282.32 282.04 281.76
285.95 285.95 285.03 283.91 283.46 283.18 282.90 282.62 282.33 282.05 281.77
286.18 286.18 285.13 283.93 283.47 283.19 282.91 282.62 282.34 282.06 281.78
286.52 286.52 285.26 283.98 283.51 283.23 282.94 282.65 282.37 282.08 281.80
287.02 287.02 285.48 284.06 283.57 283.27 282.98 282.69 282.40 282.11 281.82
287.49 287.49 285.78 284.17 283.64 283.34 283.04 282.75 282.45 282.15 281.86
288.01 288.01 286.08 284.33 283.76 283.45 283.14 282.84 282.53 282.22 281.92
288.49 288.49 286.47 284.54 283.92 283.60 283.28 282.96 282.64 282.32 281.99
288.35 288.35 286.68 284.72 284.05 283.72 283.39 283.06 282.72 282.39 282.06
287.11 287.11 286.44 284.83 284.15 283.81 283.47 283.13 282.79 282.45 282.11
286.83 286.83 286.13 284.86 284.24 283.89 283.54 283.20 282.85 282.50 282.15
287.38 287.38 286.15 284.85 284.27 283.92 283.57 283.22 282.87 282.52 282.17
287.85 287.85 286.35 284.88 284.30 283.94 283.59 283.24 282.88 282.53 282.18
288.18 288.18 286.53 284.96 284.36 284.00 283.64 283.28 282.93 282.57 282.21
288.63 288.63 286.79 285.07 284.44 284.07 283.71 283.34 282.98 282.61 282.25
288.67 288.67 286.97 285.25 284.61 284.23 283.85 283.47 283.09 282.71 282.33
288.75 288.75 287.11 285.45 284.82 284.42 284.03 283.63 283.23 282.83 282.44
288.48 288.48 287.25 285.66 285.01 284.60 284.18 283.77 283.35 282.94 282.53
287.84 287.84 287.08 285.69 285.03 284.61 284.20 283.78 283.37 282.95 282.54
287.36 287.36 286.79 285.61 284.97 284.56 284.15 283.74 283.33 282.92 282.51
287.36 287.36 286.63 285.54 284.94 284.54 284.13 283.72 283.31 282.90 282.50
287.54 287.54 286.61 285.51 284.94 284.53 284.12 283.71 283.31 282.90 282.49
287.59 287.59 286.63 285.49 284.91 284.50 284.10 283.69 283.29 282.88 282.48
287.88 287.88 286.68 285.47 284.89 284.48 284.08 283.68 283.28 282.87 282.47
287.87 287.87 286.76 285.49 284.90 284.49 284.09 283.69 283.28 282.88 282.47
287.97 287.97 286.78 285.52 284.92 284.52 284.11 283.70 283.30 282.89 282.48
288.52 288.52 287.01 285.63 285.02 284.61 284.19 283.78 283.36 282.95 282.53
289.10 289.10 287.30 285.71 285.05 284.63 284.22 283.80 283.38 282.97 282.55
289.52 289.52 287.57 285.81 285.12 284.69 284.27 283.85 283.43 283.00 282.58
289.30 289.30 287.73 285.94 285.21 284.78 284.35 283.92 283.49 283.06 282.63
288.53 288.53 287.54 286.03 285.32 284.88 284.44 284.00 283.56 283.12 282.68
288.60 288.60 287.44 286.06 285.38 284.94 284.49 284.05 283.60 283.16 282.71
289.01 289.01 287.54 286.08 285.42 284.97 284.52 284.07 283.62 283.17 282.73
289.34 289.34 287.68 286.13 285.45 285.00 284.55 284.10 283.65 283.20 282.75
289.43 289.43 287.81 286.20 285.51 285.05 284.60 284.14 283.68 283.23 282.77
289.24 289.24 287.85 286.27 285.57 285.11 284.65 284.19 283.72 283.26 282.80
288.66 288.66 287.67 286.31 285.62 285.15 284.69 284.22 283.76 283.29 282.83
287.93 287.93 287.41 286.29 285.64 285.18 284.71 284.24 283.77 283.31 282.84
287.36 287.36 287.05 286.22 285.62 285.16 284.69 284.22 283.76 283.29 282.83
287.44 287.44 286.87 286.11 285.55 285.09 284.63 284.17 283.71 283.25 282.79
287.74 287.74 286.86 286.06 285.54 285.08 284.62 284.16 283.70 283.25 282.79
288.24 288.24 287.07 286.05 285.50 285.05 284.59 284.14 283.68 283.22 282.77
288.09 288.09 287.12 286.05 285.49 285.03 284.58 284.12 283.67 283.22 282.76
288.53 288.53 287.24 286.13 285.54 285.08 284.63 284.17 283.71 283.25 282.79
288.49 288.49 287.42 286.22 285.60 285.14 284.67 284.21 283.74 283.28 282.82
287.77 287.77 287.25 286.23 285.62 285.15 284.69 284.22 283.76 283.29 282.83
287.48 287.48 287.05 286.20 285.61 285.15 284.68 284.22 283.75 283.29 282.82
287.03 287.03 286.80 286.13 285.58 285.12 284.66 284.20 283.73 283.27 282.81
287.09 287.09 286.64 286.03 285.52 285.06 284.60 284.15 283.69 283.23 282.78
286.92 286.92 286.51 285.94 285.44 284.99 284.54 284.09 283.64 283.19 282.74
286.88 286.88 286.38 285.84 285.36 284.91 284.47 284.03 283.58 283.14 282.70
287.04 287.04 286.37 285.75 285.28 284.84 284.41 283.97 283.53 283.10 282.66
287.49 287.49 286.45 285.70 285.21 284.78 284.35 283.92 283.49 283.06 282.63
287.75 287.75 286.63 285.72 285.21 284.78 284.35 283.92 283.49 283.06 282.63
287.80 287.80 286.82 285.82 285.27 284.84 284.40 283.96 283.53 283.09 282.66
287.39 287.39 286.72 285.85 285.29 284.86 284.42 283.98 283.54 283.10 282.67
287.21 287.21 286.64 285.84 285.30 284.86 284.43 283.99 283.55 283.11 282.67
286.80 286.80 286.46 285.81 285.29 284.85 284.42 283.98 283.54 283.10 282.67
287.12 287.12 286.40 285.75 285.25 284.82 284.38 283.95 283.51 283.08 282.65
287.31 287.31 286.49 285.72 285.22 284.79 284.36 283.93 283.49 283.06 282.63
287.38 287.38 286.53 285.73 285.21 284.78 284.35 283.92 283.49 283.06 282.63
287.25 287.25 286.53 285.74 285.22 284.79 284.36 283.93 283.49 283.06 282.63
287.43 287.43 286.54 285.74 285.22 284.79 284.36 283.93 283.49 283.06 282.63
288.17 288.17 286.74 285.75 285.23 284.79 284.36 283.93 283.50 283.07 282.63
288.24 288.24 286.97 285.82 285.26 284.83 284.39 283.96 283.52 283.09 282.65
287.47 287.47 286.89 285.90 285.32 284.88 284.44 284.00 283.56 283.12 282.68
287.01 287.01 286.65 285.91 285.36 284.91 284.47 284.03 283.58 283.14 282.70
286.92 286.92 286.54 285.87 285.35 284.91 284.47 284.02 283.58 283.14 282.70
286.70 286.70 286.44 285.85 285.35 284.91 284.46 284.02 283.58 283.14 282.69
286.73 286.73 286.37 285.81 285.32 284.88 284.44 284.00 283.56 283.12 282.68
286.63 286.63 286.32 285.76 285.28 284.84 284.41 283.97 283.53 283.10 282.66
286.60 286.60 286.24 285.72 285.24 284.81 284.37 283.94 283.51 283.07 282.64
286.68 286.68 286.20 285.67 285.20 284.77 284.34 283.91 283.48 283.05 282.62
286.57 286.57 286.19 285.64 285.17 284.75 284.32 283.89 283.46 283.04 282.61
286.26 286.26 286.05 285.61 285.15 284.72 284.30 283.87 283.45 283.02 282.60
286.32 286.32 285.98 285.56 285.11 284.69 284.27 283.85 283.42 283.00 282.58
286.36 286.36 285.97 285.51 285.07 284.65 284.23 283.81 283.39 282.97 282.56
286.14 286.14 285.91 285.48 285.04 284.62 284.21 283.79 283.37 282.96 282.54
285.98 285.98 285.79 285.43 285.01 284.59 284.18 283.77 283.35 282.94 282.53
285.82 285.82 285.70 285.38 284.96 284.55 284.15 283.74 283.33 282.92 282.51
285.84 285.84 285.62 285.32 284.92 284.51 284.11 283.70 283.30 282.89 282.48
285.60 285.60 285.53 285.28 284.88 284.47 284.07 283.67 283.27 282.87 282.46
286.20 286.20 285.62 285.23 284.84 284.44 284.04 283.64 283.24 282.84 282.44
285.67 285.67 285.62 285.23 284.81 284.41 284.02 283.62 283.22 282.83 282.43
285.48 285.48 285.42 285.20 284.80 284.41 284.01 283.61 283.22 282.82 282.43
284.73 284.73 285.13 285.13 284.76 284.37 283.98 283.58 283.19 282.80 282.41
284.32 284.32 284.77 285.00 284.68 284.29 283.91 283.52 283.14 282.75 282.37
284.81 284.81 284.72 284.84 284.56 284.18 283.81 283.43 283.06 282.68 282.31
285.25 285.25 284.96 284.78 284.47 284.10 283.73 283.36 283.00 282.63 282.26
284.98 284.98 284.99 284.78 284.44 284.07 283.71 283.34 282.98 282.61 282.25
283.89 283.89 284.49 284.74 284.42 284.06 283.70 283.33 282.97 282.60 282.24
282.85 282.85 283.92 284.59 284.34 283.98 283.63 283.27 282.91 282.56 282.20
282.56 282.56 283.43 284.34 284.18 283.84 283.50 283.15 282.81 282.47 282.12
281.91 281.91 282.98 284.08 283.98 283.66 283.33 283.01 282.68 282.35 282.03
283.21 283.21 283.21 283.85 283.78 283.47 283.16 282.85 282.54 282.23 281.92
282.45 282.45 283.12 283.76 283.64 283.34 283.05 282.75 282.45 282.16 281.86
282.10 282.10 282.79 283.63 283.54 283.25 282.96 282.67 282.38 282.10 281.81
283.51 283.51 283.12 283.49 283.40 283.13 282.85 282.57 282.30 282.02 281.74
282.71 282.71 283.16 283.49 283.34 283.07 282.80 282.53 282.25 281.98 281.71
281.39 281.39 282.53 283.41 283.31 283.04 282.77 282.50 282.23 281.97 281.70
282.14 282.14 282.49 283.23 283.18 282.92 282.67 282.41 282.15 281.89 281.63
281.30 281.30 282.19 283.10 283.05 282.81 282.56 282.31 282.07 281.82 281.57
281.57 281.57 282.11 282.95 282.93 282.69 282.46 282.22 281.98 281.75 281.51
281.38 281.38 281.98 282.82 282.81 282.58 282.36 282.13 281.90 281.68 281.45
282.03 282.03 282.20 282.73 282.70 282.48 282.27 282.05 281.83 281.62 281.40
281.28 281.28 281.92 282.67 282.63 282.42 282.21 282.00 281.79 281.58 281.37
279.87 279.87 281.30 282.54 282.55 282.35 282.14 281.94 281.73 281.53 281.33
279.82 279.82 280.88 282.29 282.39 282.20 282.01 281.82 281.63 281.44 281.25
280.27 280.27 280.93 282.08 282.20 282.02 281.85 281.67 281.50 281.33 281.15
278.94 278.94 280.40 281.92 282.05 281.88 281.72 281.56 281.40 281.24 281.08
279.14 279.14 280.21 281.70 281.88 281.73 281.58 281.44 281.29 281.14 280.99
278.28 278.28 279.78 281.49 281.70 281.57 281.44 281.30 281.17 281.04 280.91
277.82 277.82 279.28 281.23 281.50 281.38 281.27 281.15 281.04 280.92 280.81
278.23 278.23 279.21 280.97 281.27 281.17 281.08 280.98 280.89 280.79 280.70
278.79 278.79 279.40 280.80 281.08 281.00 280.92 280.84 280.77 280.69 280.61
279.15 279.15 279.58 280.73 280.97 280.90 280.83 280.76 280.69 280.62 280.55
279.15 279.15 279.68 280.70 280.90 280.84 280.77 280.71 280.65 280.58 280.52
279.10 279.10 279.66 280.67 280.86 280.80 280.74 280.68 280.62 280.56 280.50
278.31 278.31 279.38 280.62 280.81 280.75 280.70 280.64 280.59 280.53 280.47
277.85 277.85 278.98 280.48 280.72 280.67 280.63 280.58 280.53 280.48 280.43
277.66 277.66 278.81 280.32 280.59 280.55 280.52 280.48 280.44 280.40 280.37
278.15 278.15 278.78 280.16 280.45 280.43 280.40 280.37 280.35 280.32 280.30
278.17 278.17 278.84 280.06 280.34 280.32 280.30 280.29 280.27 280.26 280.24
278.33 278.33 278.87 280.00 280.26 280.25 280.24 280.23 280.22 280.21 280.20
278.46 278.46 278.96 279.96 280.20 280.20 280.19 280.19 280.18 280.18 280.17
278.71 278.71 279.04 279.94 280.16 280.16 280.16 280.16 280.16 280.16 280.16
278.95 278.95 279.22 279.94 280.14 280.14 280.14 280.14 280.14 280.14 280.14
278.66 278.66 279.15 279.96 280.14 280.14 280.14 280.14 280.14 280.14 280.14
279.21 279.21 279.31 279.95 280.13 280.13 280.13 280.13 280.14 280.14 280.14
278.71 278.71 279.27 279.98 280.13 280.13 280.13 280.13 280.14 280.14 280.14
279.53 279.53 279.42 279.97 280.12 280.12 280.13 280.13 280.13 280.13 280.14
279.78 279.78 279.72 280.02 280.13 280.13 280.13 280.14 280.14 280.14 280.14
279.84 279.84 279.84 280.10 280.18 280.18 280.18 280.17 280.17 280.17 280.17
279.77 279.77 279.87 280.16 280.23 280.22 280.22 280.21 280.20 280.20 280.19
279.65 279.65 279.85 280.20 280.27 280.26 280.25 280.24 280.23 280.22 280.21
279.40 279.40 279.74 280.21 280.29 280.28 280.26 280.25 280.24 280.23 280.22
279.30 279.30 279.66 280.19 280.28 280.27 280.26 280.25 280.24 280.23 280.22
278.58 278.58 279.43 280.16 280.27 280.26 280.25 280.24 280.23 280.22 280.21
277.69 277.69 278.93 280.05 280.21 280.21 280.20 280.20 280.19 280.19 280.18
277.77 277.77 278.61 279.87 280.10 280.10 280.11 280.11 280.12 280.12 280.12
277.96 277.96 278.63 279.71 279.96 279.97 279.99 280.01 280.02 280.04 280.06
277.72 277.72 278.50 279.60 279.85 279.87 279.90 279.93 279.95 279.98 280.00
277.50 277.50 278.32 279.49 279.75 279.79 279.82 279.85 279.89 279.92 279.96
277.14 277.14 278.17 279.38 279.65 279.69 279.73 279.78 279.82 279.86 279.90
276.24 276.24 277.68 279.24 279.55 279.60 279.65 279.70 279.75 279.80 279.85
276.07 276.07 277.33 279.03 279.40 279.46 279.53 279.59 279.65 279.72 279.78
276.41 276.41 277.27 278.83 279.22 279.30 279.38 279.46 279.54 279.62 279.70
276.64 276.64 277.34 278.68 279.07 279.16 279.25 279.35 279.44 279.53 279.62
276.12 276.12 277.18 278.58 278.96 279.06 279.16 279.26 279.36 279.46 279.57
275.07 275.07 276.62 278.44 278.86 278.97 279.08 279.19 279.30 279.41 279.52
274.75 274.75 276.21 278.22 278.70 278.82 278.95 279.07 279.19 279.32 279.44
274.77 274.77 276.05 278.00 278.51 278.65 278.79 278.93 279.07 279.21 279.35
274.98 274.98 276.01 277.82 278.33 278.49 278.64 278.80 278.95 279.11 279.26
275.38 275.38 276.12 277.69 278.19 278.36 278.53 278.69 278.86 279.03 279.19
275.81 275.81 276.32 277.62 278.09 278.26 278.44 278.61 278.79 278.96 279.14
274.90 274.90 276.04 277.57 278.03 278.21 278.39 278.57 278.75 278.93 279.11
274.45 274.45 275.72 277.46 277.95 278.14 278.33 278.51 278.70 278.89 279.07
274.02 274.02 275.38 277.29 277.83 278.03 278.22 278.42 278.62 278.82 279.01
274.47 274.47 275.31 277.11 277.68 277.89 278.10 278.31 278.52 278.73 278.94
274.71 274.71 275.49 277.01 277.55 277.77 277.99 278.21 278.44 278.66 278.88
275.16 275.16 275.64 276.97 277.48 277.71 277.93 278.16 278.39 278.62 278.84
274.38 274.38 275.49 276.95 277.44 277.67 277.90 278.13 278.36 278.59 278.82
274.10 274.10 275.17 276.86 277.39 277.62 277.86 278.09 278.33 278.56 278.80
273.95 273.95 275.06 276.75 277.29 277.54 277.78 278.02 278.27 278.51 278.75
273.60 273.60 274.81 276.63 277.20 277.45 277.70 277.95 278.20 278.45 278.71
273.52 273.52 274.66 276.49 277.09 277.35 277.61 277.87 278.13 278.39 278.65
273.54 273.54 274.59 276.38 276.98 277.25 277.52 277.79 278.06 278.33 278.60
273.50 273.50 274.53 276.28 276.88 277.16 277.44 277.72 277.99 278.27 278.55
273.47 273.47 274.47 276.20 276.80 277.09 277.37 277.66 277.94 278.23 278.51
273.40 273.40 274.40 276.12 276.72 277.02 277.31 277.60 277.89 278.18 278.47
273.38 273.38 274.35 276.04 276.64 276.94 277.24 277.54 277.84 278.13 278.43
273.37 273.37 274.32 275.97 276.57 276.88 277.18 277.49 277.79 278.10 278.40
273.35 273.35 274.28 275.90 276.50 276.81 277.12 277.43 277.74 278.06 278.37
273.29 273.29 274.22 275.83 276.43 276.75 277.07 277.38 277.70 278.02 278.33
273.25 273.25 274.17 275.76 276.37 276.69 277.01 277.33 277.65 277.98 278.30
273.24 273.24 274.13 275.70 276.31 276.63 276.96 277.29 277.61 277.94 278.27
273.24 273.24 274.10 275.65 276.25 276.58 276.92 277.25 277.58 277.91 278.24
273.24 273.24 274.08 275.59 276.20 276.53 276.87 277.21 277.54 277.88 278.22
273.24 273.24 274.06 275.55 276.15 276.49 276.83 277.17 277.51 277.85 278.19
273.25 273.25 274.04 275.50 276.10 276.45 276.79 277.13 277.48 277.82 278.17
273.28 273.28 274.04 275.46 276.06 276.40 276.75 277.10 277.45 277.80 278.15
273.29 273.29 274.03 275.43 276.02 276.37 276.72 277.07 277.42 277.78 278.13
273.25 273.25 274.01 275.38 275.97 276.33 276.68 277.04 277.39 277.75 278.11
273.27 273.27 273.99 275.35 275.94 276.30 276.66 277.01 277.37 277.73 278.09
273.09 273.09 273.89 275.30 275.89 276.25 276.62 276.98 277.34 277.70 278.07
273.04 273.04 273.82 275.26 275.85 276.22 276.58 276.95 277.32 277.68 278.05
273.11 273.11 273.84 275.22 275.81 276.18 276.55 276.92 277.29 277.66 278.03
273.19 273.19 273.89 275.20 275.79 276.16 276.53 276.90 277.27 277.64 278.01
273.09 273.09 273.84 275.17 275.76 276.13 276.51 276.88 277.25 277.63 278.00
273.09 273.09 273.84 275.17 275.76 276.13 276.51 276.88 277.25 277.63 278.00
272.95 272.95 273.68 274.88 275.45 275.85 276.25 276.65 277.05 277.45 277.85
272.95 272.95 273.68 274.88 275.45 275.85 276.25 276.65 277.05 277.45 277.85
272.95 272.95 273.68 274.88 275.45 275.85 276.25 276.65 277.05 277.45 277.85
272.95 272.95 273.65 274.82 275.41 275.81 276.21 276.62 277.02 277.43 277.83
272.95 272.95 273.65 274.78 275.36 275.76 276.17 276.58 276.99 277.40 277.80
272.95 272.95 273.65 274.78 275.36 275.76 276.17 276.58 276.99 277.40 277.80
272.95 272.95 273.65 274.78 275.36 275.76 276.17 276.58 276.99 277.40 277.80
272.95 272.95 273.65 274.77 275.33 275.74 276.15 276.56 276.97 277.38 277.79
272.95 272.95 273.65 274.72 275.26 275.68 276.09 276.51 276.93 277.34 277.76
272.95 272.95 273.65 274.72 275.26 275.68 276.09 276.51 276.93 277.34 277.76
272.95 272.95 273.64 274.70 275.26 275.68 276.09 276.51 276.93 277.34 277.76
272.95 272.95 273.56 274.68 275.26 275.68 276.09 276.51 276.93 277.34 277.76
272.92 272.92 273.55 274.62 275.18 275.60 276.02 276.45 276.87 277.29 277.72
272.90 272.90 273.55 274.62 275.17 275.59 276.02 276.44 276.86 277.29 277.71
272.92 272.92 273.55 274.62 275.17 275.59 276.02 276.44 276.86 277.29 277.71
272.95 272.95 273.55 274.62 275.17 275.59 276.02 276.44 276.86 277.29 277.71
272.88 272.88 273.53 274.57 275.13 275.56 275.99 276.41 276.84 277.27 277.69
272.85 272.85 273.52 274.52 275.07 275.51 275.94 276.37 276.80 277.23 277.67
272.85 272.85 273.52 274.52 275.07 275.51 275.94 276.37 276.80 277.23 277.67
272.86 272.86 273.52 274.52 275.07 275.51 275.94 276.37 276.80 277.23 277.67
272.85 272.85 273.53 274.52 275.07 275.51 275.94 276.37 276.80 277.23 277.67
272.85 272.85 273.58 274.51 275.07 275.50 275.93 276.37 276.80 277.23 277.66
272.88 272.88 273.58 274.48 275.02 275.46 275.89 276.33 276.77 277.20 277.64
272.95 272.95 273.58 274.52 275.07 275.51 275.94 276.37 276.80 277.23 277.67
272.95 272.95 273.58 274.52 275.07 275.51 275.94 276.37 276.80 277.23 277.67
272.95 272.95 273.58 274.49 275.04 275.48 275.91 276.35 276.78 277.22 277.65
272.95 272.95 273.58 274.45 274.98 275.42 275.86 276.30 276.74 277.18 277.62
272.95 272.95 273.57 274.45 274.98 275.42 275.86 276.30 276.74 277.18 277.62
272.95 272.95 273.52 274.45 274.98 275.42 275.86 276.30 276.74 277.18 277.62
272.95 272.95 273.52 274.45 274.98 275.42 275.86 276.30 276.74 277.18 277.62
272.90 272.90 273.49 274.42 274.98 275.42 275.86 276.30 276.74 277.18 277.62
272.95 272.95 273.49 274.42 274.98 275.42 275.86 276.30 276.74 277.18 277.62
272.91 272.91 273.48 274.38 274.93 275.38 275.82 276.26 276.71 277.15 277.60
272.85 272.85 273.48 274.35 274.89 275.33 275.78 276.23 276.68 277.13 277.57
272.85 272.85 273.48 274.35 274.89 275.33 275.78 276.23 276.68 277.13 277.57
272.85 272.85 273.48 274.35 274.89 275.33 275.78 276.23 276.68 277.13 277.57
272.85 272.85 273.48 274.35 274.88 275.33 275.78 276.23 276.68 277.12 277.57
272.85 272.85 273.48 274.32 274.84 275.29 275.74 276.19 276.65 277.10 277.55
272.85 272.85 273.48 274.28 274.79 275.25 275.70 276.16 276.62 277.07 277.53
272.85 272.85 273.48 274.28 274.79 275.25 275.70 276.16 276.62 277.07 277.53
272.85 272.85 273.48 274.28 274.79 275.25 275.70 276.16 276.62 277.07 277.53
272.86 272.86 273.48 274.28 274.79 275.25 275.70 276.16 276.62 277.07 277.53
272.95 272.95 273.48 274.28 274.79 275.25 275.70 276.16 276.62 277.07 277.53
272.95 272.95 273.48 274.28 274.79 275.25 275.70 276.16 276.62 277.07 277.53
272.95 272.95 273.48 274.28 274.79 275.25 275.70 276.16 276.62 277.07 277.53
272.95 272.95 273.48 274.28 274.79 275.25 275.70 276.16 276.62 277.07 277.53
272.93 272.93 273.45 274.25 274.79 275.25 275.70 276.16 276.62 277.07 277.53
272.85 272.85 273.45 274.19 274.71 275.17 275.64 276.10 276.56 277.03 277.49
272.85 272.85 273.45 274.18 274.70 275.16 275.63 276.09 276.55 277.02 277.48
272.94 272.94 273.45 274.23 274.77 275.23 275.68 276.14 276.60 277.06 277.52
272.95 272.95 273.45 274.23 274.77 275.23 275.68 276.14 276.60 277.06 277.52
272.95 272.95 273.45 274.20 274.72 275.18 275.64 276.11 276.57 277.03 277.49
272.95 272.95 273.45 274.18 274.70 275.16 275.63 276.09 276.55 277.02 277.48
272.95 272.95 273.45 274.18 274.70 275.16 275.63 276.09 276.55 277.02 277.48
272.95 272.95 273.45 274.18 274.70 275.16 275.63 276.09 276.55 277.02 277.48
272.94 272.94 273.45 274.18 274.70 275.16 275.63 276.09 276.55 277.02 277.48
272.85 272.85 273.45 274.18 274.69 275.16 275.62 276.09 276.55 277.02 277.48
272.85 272.85 273.44 274.14 274.64 275.11 275.58 276.05 276.52 276.99 277.46
272.85 272.85 273.43 274.10 274.61 275.08 275.55 276.02 276.49 276.97 277.44
272.95 272.95 273.38 274.24 274.81 275.27 275.72 276.18 276.63 277.08 277.54
272.95 272.95 273.38 274.23 274.80 275.25 275.71 276.16 276.62 277.08 277.53
272.95 272.95 273.37 274.21 274.78 275.23 275.69 276.15 276.61 277.06 277.52
272.95 272.95 273.37 274.19 274.76 275.21 275.67 276.13 276.59 277.05 277.51
272.95 272.95 273.37 274.18 274.73 275.19 275.65 276.12 276.58 277.04 277.50
272.95 272.95 273.37 274.16 274.71 275.17 275.64 276.10 276.56 277.03 277.49
272.96 272.96 273.37 274.14 274.69 275.16 275.62 276.09 276.55 277.01 277.48
272.97 272.97 273.37 274.13 274.67 275.14 275.61 276.07 276.54 277.00 277.47
272.96 272.96 273.36 274.11 274.65 275.12 275.59 276.05 276.52 276.99 277.46
272.97 272.97 273.37 274.10 274.64 275.11 275.57 276.04 276.51 276.98 277.45
272.97 272.97 273.37 274.09 274.62 275.09 275.56 276.03 276.50 276.97 277.44
272.97 272.97 273.36 274.08 274.61 275.08 275.56 276.03 276.50 276.97 277.44
272.97 272.97 273.36 274.08 274.61 275.08 275.55 276.02 276.50 276.97 277.44
272.97 272.97 273.36 274.18 274.75 275.21 275.67 276.13 276.59 277.05 277.51
272.97 272.97 273.36 274.18 274.75 275.21 275.67 276.13 276.59 277.05 277.51
272.98 272.98 273.36 274.18 274.75 275.21 275.67 276.13 276.59 277.05 277.51
272.95 272.95 273.36 274.17 274.74 275.20 275.66 276.12 276.58 277.04 277.50
272.95 272.95 273.36 274.16 274.73 275.19 275.65 276.12 276.58 277.04 277.50
272.95 272.95 273.36 274.15 274.72 275.18 275.65 276.11 276.57 277.03 277.49
272.95 272.95 273.35 274.14 274.71 275.17 275.64 276.10 276.56 277.03 277.49
272.95 272.95 273.35 274.13 274.70 275.17 275.63 276.09 276.56 277.02 277.48
272.95 272.95 273.35 274.12 274.69 275.16 275.62 276.09 276.55 277.01 277.48
272.95 272.95 273.34 274.11 274.68 275.15 275.61 276.08 276.54 277.01 277.47
272.95 272.95 273.34 274.10 274.67 275.14 275.60 276.07 276.54 277.00 277.47
272.95 272.95 273.34 274.09 274.66 275.13 275.60 276.06 276.53 277.00 277.46
272.95 272.95 273.33 274.08 274.65 275.12 275.59 276.06 276.52 276.99 277.46
272.95 272.95 273.33 274.07 274.64 275.11 275.58 276.05 276.52 276.99 277.45
272.95 272.95 273.33 274.06 274.63 275.10 275.57 276.04 276.51 276.98 277.45
272.95 272.95 273.33 274.05 274.62 275.09 275.56 276.03 276.50 276.97 277.44
272.95 272.95 273.32 274.04 274.61 275.08 275.55 276.03 276.50 276.97 277.44
272.95 272.95 273.32 274.03 274.60 275.07 275.55 276.02 276.49 276.96 277.43
272.95 272.95 273.32 274.02 274.59 275.06 275.54 276.01 276.48 276.96 277.43
272.95 272.95 273.31 274.01 274.58 275.05 275.53 276.00 276.48 276.95 277.42
272.95 272.95 273.31 274.00 274.57 275.05 275.52 276.00 276.47 276.94 277.42
272.95 272.95 273.31 273.99 274.56 275.04 275.51 275.99 276.46 276.94 277.41
272.95 272.95 273.31 273.98 274.55 275.03 275.50 275.98 276.46 276.93 277.41
272.95 272.95 273.30 273.97 274.54 275.02 275.50 275.97 276.45 276.93 277.40
272.92 272.92 273.23 273.97 274.53 275.01 275.49 275.97 276.44 276.92 277.40
272.92 272.92 273.22 273.96 274.52 275.00 275.48 275.96 276.44 276.91 277.39
272.92 272.92 273.22 273.95 274.51 274.99 275.47 275.95 276.43 276.91 277.39
272.92 272.92 273.22 273.94 274.50 274.98 275.46 275.94 276.42 276.90 277.38
272.92 272.92 273.21 273.93 274.49 274.97 275.45 275.94 276.42 276.90 277.38
272.93 272.93 273.22 273.93 274.50 274.98 275.46 275.94 276.42 276.90 277.38
272.93 272.93 273.22 273.94 274.50 274.98 275.46 275.94 276.42 276.90 277.38
273.00 273.00 273.24 273.93 274.49 274.97 275.45 275.93 276.42 276.90 277.38
273.66 273.66 273.56 273.94 274.49 274.97 275.45 275.93 276.41 276.90 277.38
274.98 274.98 274.04 274.01 274.52 275.00 275.48 275.96 276.44 276.92 277.40
276.60 276.60 274.89 274.20 274.61 275.09 275.56 276.03 276.50 276.97 277.44
277.25 277.25 275.78 274.54 274.81 275.26 275.71 276.17 276.62 277.08 277.53
277.15 277.15 275.86 274.86 275.07 275.50 275.94 276.37 276.80 277.23 277.67
277.00 277.00 276.24 275.14 275.30 275.72 276.13 276.54 276.95 277.37 277.78
278.87 278.87 276.67 275.36 275.52 275.91 276.30 276.70 277.09 277.49 277.88
280.45 280.45 277.84 275.71 275.73 276.11 276.48 276.86 277.24 277.61 277.99
281.13 281.13 278.59 276.16 276.07 276.42 276.76 277.11 277.46 277.81 278.15
281.87 281.87 279.32 276.65 276.46 276.77 277.09 277.40 277.71 278.03 278.34
282.88 282.88 280.09 277.15 276.86 277.14 277.42 277.70 277.98 278.26 278.54
283.76 283.76 280.96 277.68 277.29 277.54 277.78 278.02 278.27 278.51 278.75
283.65 283.65 281.27 278.19 277.74 277.95 278.15 278.36 278.56 278.77 278.97
283.06 283.06 281.28 278.58 278.14 278.31 278.48 278.65 278.82 278.99 279.16
282.70 282.70 281.22 278.85 278.44 278.59 278.73 278.88 279.02 279.17 279.31
281.77 281.77 280.89 279.02 278.67 278.79 278.92 279.04 279.17 279.30 279.42
280.27 280.27 280.20 279.07 278.80 278.92 279.03 279.15 279.26 279.38 279.49
279.44 279.44 279.55 278.97 278.82 278.93 279.05 279.16 279.27 279.39 279.50
279.58 279.58 279.36 278.82 278.76 278.88 278.99 279.11 279.23 279.35 279.47
279.52 279.52 279.18 278.71 278.68 278.81 278.93 279.06 279.18 279.31 279.43
280.03 280.03 279.26 278.53 278.47 278.61 278.76 278.90 279.04 279.18 279.33
280.67 280.67 279.56 278.54 278.45 278.59 278.74 278.88 279.03 279.17 279.32
281.43 281.43 279.97 278.63 278.49 278.63 278.77 278.91 279.05 279.20 279.34
282.17 282.17 280.45 278.78 278.58 278.72 278.85 278.98 279.12 279.25 279.38
282.84 282.84 281.03 278.99 278.73 278.85 278.97 279.09 279.21 279.33 279.45
283.10 283.10 281.37 279.25 278.92 279.03 279.13 279.23 279.34 279.44 279.55
283.75 283.75 281.88 279.52 279.14 279.22 279.31 279.40 279.48 279.57 279.65
284.08 284.08 282.28 279.81 279.38 279.44 279.51 279.57 279.64 279.71 279.77
283.69 283.69 282.31 280.07 279.61 279.66 279.70 279.75 279.79 279.84 279.89
282.86 282.86 282.06 280.23 279.80 279.83 279.86 279.89 279.92 279.95 279.98
282.71 282.71 281.81 280.28 279.91 279.93 279.95 279.97 279.99 280.01 280.03
282.79 282.79 281.81 280.30 279.96 279.98 280.00 280.01 280.03 280.04 280.06
282.57 282.57 281.76 280.37 280.05 280.06 280.07 280.08 280.08 280.09 280.10
282.62 282.62 281.72 280.39 280.07 280.08 280.08 280.09 280.10 280.10 280.11
282.31 282.31 281.70 280.42 280.11 280.11 280.12 280.12 280.12 280.13 280.13
282.61 282.61 281.65 280.43 280.14 280.15 280.15 280.15 280.15 280.15 280.15
282.98 282.98 281.96 280.48 280.18 280.18 280.18 280.17 280.17 280.17 280.17
282.76 282.76 281.90 280.56 280.26 280.25 280.24 280.23 280.22 280.21 280.20
283.26 283.26 282.15 280.64 280.33 280.31 280.30 280.28 280.27 280.25 280.24
282.81 282.81 282.05 280.74 280.41 280.39 280.37 280.34 280.32 280.30 280.28
282.85 282.85 282.08 280.79 280.48 280.45 280.42 280.39 280.36 280.34 280.31
282.57 282.57 281.98 280.83 280.52 280.49 280.46 280.43 280.39 280.36 280.33
282.45 282.45 281.90 280.84 280.56 280.53 280.49 280.46 280.42 280.39 280.35
282.50 282.50 281.81 280.85 280.59 280.55 280.51 280.47 280.44 280.40 280.36
282.88 282.88 282.06 280.87 280.60 280.56 280.52 280.48 280.45 280.41 280.37
282.56 282.56 281.95 280.92 280.64 280.60 280.56 280.52 280.47 280.43 280.39
282.80 282.80 281.98 280.94 280.67 280.63 280.58 280.54 280.49 280.45 280.40
284.79 284.79 282.73 281.01 280.71 280.66 280.61 280.57 280.52 280.47 280.42
285.85 285.85 283.75 281.28 280.84 280.79 280.73 280.67 280.61 280.55 280.49
285.24 285.24 283.88 281.62 281.10 281.02 280.94 280.86 280.78 280.70 280.61
285.56 285.56 284.05 281.86 281.33 281.23 281.13 281.03 280.93 280.83 280.73
285.45 285.45 284.16 282.06 281.52 281.41 281.29 281.17 281.05 280.94 280.82
285.35 285.35 284.11 282.21 281.69 281.56 281.42 281.29 281.16 281.03 280.90
285.74 285.74 284.26 282.34 281.81 281.67 281.53 281.39 281.25 281.11 280.96
286.33 286.33 284.60 282.49 281.95 281.79 281.64 281.49 281.33 281.18 281.03
286.54 286.54 284.87 282.69 282.10 281.94 281.77 281.60 281.44 281.27 281.11
286.75 286.75 285.02 282.88 282.28 282.10 281.92 281.74 281.55 281.37 281.19
287.11 287.11 285.23 283.06 282.44 282.25 282.05 281.86 281.66 281.47 281.27
287.15 287.15 285.41 283.24 282.62 282.41 282.20 281.99 281.78 281.57 281.36
286.44 286.44 285.43 283.63 283.06 282.81 282.57 282.32 282.07 281.82 281.57
285.21 285.21 284.98 283.72 283.19 282.93 282.67 282.42 282.16 281.90 281.64
285.09 285.09 284.67 283.68 283.23 282.96 282.70 282.44 282.18 281.92 281.66
285.25 285.25 284.58 283.60 283.18 282.92 282.66 282.41 282.15 281.89 281.63
285.50 285.50 284.60 283.55 283.14 282.88 282.63 282.38 282.12 281.87 281.61
285.65 285.65 284.68 283.54 283.13 282.87 282.62 282.37 282.11 281.86 281.61
285.86 285.86 284.78 283.58 283.15 282.90 282.64 282.38 282.13 281.87 281.62
286.02 286.02 284.94 283.65 283.20 282.94 282.68 282.42 282.16 281.90 281.64
286.02 286.02 285.01 283.73 283.27 283.00 282.74 282.47 282.21 281.94 281.68
285.79 285.79 284.97 283.78 283.32 283.05 282.78 282.51 282.24 281.97 281.70
285.81 285.81 285.00 283.82 283.36 283.09 282.81 282.54 282.27 281.99 281.72
285.70 285.70 284.97 283.88 283.42 283.14 282.87 282.59 282.31 282.03 281.75
285.81 285.81 284.99 283.89 283.44 283.16 282.88 282.60 282.32 282.04 281.76
285.95 285.95 285.03 283.91 283.46 283.18 282.90 282.62 282.33 282.05 281.77
286.18 286.18 285.13 283.93 283.47 283.19 282.91 282.62 282.34 282.06 281.78
286.52 286.52 285.26 283.98 283.51 283.23 282.94 282.65 282.37 282.08 281.80
287.02 287.02 285.48 284.06 283.57 283.27 282.98 282.69 282.40 282.11 281.82
287.49 287.49 285.78 284.17 283.64 283.34 283.04 282.75 282.45 282.15 281.86
288.01 288.01 286.08 284.33 283.76 283.45 283.14 282.84 282.53 282.22 281.92
288.49 288.49 286.47 284.54 283.92 283.60 283.28 282.96 282.64 282.32 281.99
288.35 288.35 286.68 284.72 284.05 283.72 283.39 283.06 282.72 282.39 282.06
287.11 287.11 286.44 284.83 284.15 283.81 283.47 283.13 282.79 282.45 282.11
286.83 286.83 286.13 284.86 284.24 283.89 283.54 283.20 282.85 282.50 282.15
287.38 287.38 286.15 284.85 284.27 283.92 283.57 283.22 282.87 282.52 282.17
287.85 287.85 286.35 284.88 284.30 283.94 283.59 283.24 282.88 282.53 282.18
288.18 288.18 286.53 284.96 284.36 284.00 283.64 283.28 282.93 282.57 282.21
288.63 288.63 286.79 285.07 284.44 284.07 283.71 283.34 282.98 282.61 282.25
288.67 288.67 286.97 285.25 284.61 284.23 283.85 283.47 283.09 282.71 282.33
288.75 288.75 287.11 285.45 284.82 284.42 284.03 283.63 283.23 282.83 282.44
288.48 288.48 287.25 285.66 285.01 284.60 284.18 283.77 283.35 282.94 282.53
287.84 287.84 287.08 285.69 285.03 284.61 284.20 283.78 283.37 282.95 282.54
287.36 287.36 286.79 285.61 284.97 284.56 284.15 283.74 283.33 282.92 282.51
287.36 287.36 286.63 285.54 284.94 284.54 284.13 283.72 283.31 282.90 282.50
287.54 287.54 286.61 285.51 284.94 284.53 284.12 283.71 283.31 282.90 282.49
287.59 287.59 286.63 285.49 284.91 284.50 284.10 283.69 283.29 282.88 282.48
287.88 287.88 286.68 285.47 284.89 284.48 284.08 283.68 283.28 282.87 282.47
287.87 287.87 286.76 285.49 284.90 284.49 284.09 283.69 283.28 282.88 282.47
287.97 287.97 286.78 285.52 284.92 284.52 284.11 283.70 283.30 282.89 282.48
288.52 288.52 287.01 285.63 285.02 284.61 284.19 283.78 283.36 282.95 282.53
289.10 289.10 287.30 285.71 285.05 284.63 284.22 283.80 283.38 282.97 282.55
289.52 289.52 287.57 285.81 285.12 284.69 284.27 283.85 283.43 283.00 282.58
289.30 289.30 287.73 285.94 285.21 284.78 284.35 283.92 283.49 283.06 282.63
288.53 288.53 287.54 286.03 285.32 284.88 284.44 284.00 283.56 283.12 282.68
288.60 288.60 287.44 286.06 285.38 284.94 284.49 284.05 283.60 283.16 282.71
289.01 289.01 287.54 286.08 285.42 284.97 284.52 284.07 283.62 283.17 282.73
289.34 289.34 287.68 286.13 285.45 285.00 284.55 284.10 283.65 283.20 282.75
289.43 289.43 287.81 286.20 285.51 285.05 284.60 284.14 283.68 283.23 282.77
289.24 289.24 287.85 286.27 285.57 285.11 284.65 284.19 283.72 283.26 282.80
288.66 288.66 287.67 286.31 285.62 285.15 284.69 284.22 283.76 283.29 282.83
287.93 287.93 287.41 286.29 285.64 285.18 284.71 284.24 283.77 283.31 282.84
287.36 287.36 287.05 286.22 285.62 285.16 284.69 284.22 283.76 283.29 282.83
287.44 287.44 286.87 286.11 285.55 285.09 284.63 284.17 283.71 283.25 282.79
287.74 287.74 286.86 286.06 285.54 285.08 284.62 284.16 283.70 283.25 282.79
288.24 288.24 287.07 286.05 285.50 285.05 284.59 284.14 283.68 283.22 282.77
288.09 288.09 287.12 286.05 285.49 285.03 284.58 284.12 283.67 283.22 282.76
288.53 288.53 287.24 286.13 285.54 285.08 284.63 284.17 283.71 283.25 282.79
288.49 288.49 287.42 286.22 285.60 285.14 284.67 284.21 283.74 283.28 282.82
287.77 287.77 287.25 286.23 285.62 285.15 284.69 284.22 283.76 283.29 282.83
287.48 287.48 287.05 286.20 285.61 285.15 284.68 284.22 283.75 283.29 282.82
287.03 287.03 286.80 286.13 285.58 285.12 284.66 284.20 283.73 283.27 282.81
287.09 287.09 286.64 286.03 285.52 285.06 284.60 284.15 283.69 283.23 282.78
286.92 286.92 286.51 285.94 285.44 284.99 284.54 284.09 283.64 283.19 282.74
286.88 286.88 286.38 285.84 285.36 284.91 284.47 284.03 283.58 283.14 282.70
287.04 287.04 286.37 285.75 285.28 284.84 284.41 283.97 283.53 283.10 282.66
287.49 287.49 286.45 285.70 285.21 284.78 284.35 283.92 283.49 283.06 282.63
287.75 287.75 286.63 285.72 285.21 284.78 284.35 283.92 283.49 283.06 282.63
287.80 287.80 286.82 285.82 285.27 284.84 284.40 283.96 283.53 283.09 282.66
287.39 287.39 286.72 285.85 285.29 284.86 284.42 283.98 283.54 283.10 282.67
287.21 287.21 286.64 285.84 285.30 284.86 284.43 283.99 283.55 283.11 282.67
286.80 286.80 286.46 285.81 285.29 284.85 284.42 283.98 283.54 283.10 282.67
287.12 287.12 286.40 285.75 285.25 284.82 284.38 283.95 283.51 283.08 282.65
287.31 287.31 286.49 285.72 285.22 284.79 284.36 283.93 283.49 283.06 282.63
287.38 287.38 286.53 285.73 285.21 284.78 284.35 283.92 283.49 283.06 282.63
287.25 287.25 286.53 285.74 285.22 284.79 284.36 283.93 283.49 283.06 282.63
287.43 287.43 286.54 285.74 285.22 284.79 284.36 283.93 283.49 283.06 282.63
288.17 288.17 286.74 285.75 285.23 284.79 284.36 283.93 283.50 283.07 282.63
288.24 288.24 286.97 285.82 285.26 284.83 284.39 283.96 283.52 283.09 282.65
287.47 287.47 286.89 285.90 285.32 284.88 284.44 284.00 283.56 283.12 282.68
287.01 287.01 286.65 285.91 285.36 284.91 284.47 284.03 283.58 283.14 282.70
286.92 286.92 286.54 285.87 285.35 284.91 284.47 284.02 283.58 283.14 282.70
286.70 286.70 286.44 285.85 285.35 284.91 284.46 284.02 283.58 283.14 282.69
286.73 286.73 286.37 285.81 285.32 284.88 284.44 284.00 283.56 283.12 282.68
286.63 286.63 286.32 285.76 285.28 284.84 284.41 283.97 283.53 283.10 282.66
286.60 286.60 286.24 285.72 285.24 284.81 284.37 283.94 283.51 283.07 282.64
286.68 286.68 286.20 285.67 285.20 284.77 284.34 283.91 283.48 283.05 282.62
286.57 286.57 286.19 285.64 285.17 284.75 284.32 283.89 283.46 283.04 282.61
286.26 286.26 286.05 285.61 285.15 284.72 284.30 283.87 283.45 283.02 282.60
286.32 286.32 285.98 285.56 285.11 284.69 284.27 283.85 283.42 283.00 282.58
286.36 286.36 285.97 285.51 285.07 284.65 284.23 283.81 283.39 282.97 282.56
286.14 286.14 285.91 285.48 285.04 284.62 284.21 283.79 283.37 282.96 282.54
285.98 285.98 285.79 285.43 285.01 284.59 284.18 283.77 283.35 282.94 282.53
285.82 285.82 285.70 285.38 284.96 284.55 284.15 283.74 283.33 282.92 282.51
285.84 285.84 285.62 285.32 284.92 284.51 284.11 283.70 283.30 282.89 282.48
285.60 285.60 285.53 285.28 284.88 284.47 284.07 283.67 283.27 282.87 282.46
286.20 286.20 285.62 285.23 284.84 284.44 284.04 283.64 283.24 282.84 282.44
285.67 285.67 285.62 285.23 284.81 284.41 284.02 283.62 283.22 282.83 282.43
285.48 285.48 285.42 285.20 284.80 284.41 284.01 283.61 283.22 282.82 282.43
284.73 284.73 285.13 285.13 284.76 284.37 283.98 283.58 283.19 282.80 282.41
284.32 284.32 284.77 285.00 284.68 284.29 283.91 283.52 283.14 282.75 282.37
284.81 284.81 284.72 284.84 284.56 284.18 283.81 283.43 283.06 282.68 282.31
285.25 285.25 284.96 284.78 284.47 284.10 283.73 283.36 283.00 282.63 282.26
284.98 284.98 284.99 284.78 284.44 284.07 283.71 283.34 282.98 282.61 282.25
283.89 283.89 284.49 284.74 284.42 284.06 283.70 283.33 282.97 282.60 282.24
282.85 282.85 283.92 284.59 284.34 283.98 283.63 283.27 282.91 282.56 282.20
282.56 282.56 283.43 284.34 284.18 283.84 283.50 283.15 282.81 282.47 282.12
281.91 281.91 282.98 284.08 283.98 283.66 283.33 283.01 282.68 282.35 282.03
283.21 283.21 283.21 283.85 283.78 283.47 283.16 282.85 282.54 282.23 281.92
282.45 282.45 283.12 283.76 283.64 283.34 283.05 282.75 282.45 282.16 281.86
282.10 282.10 282.79 283.63 283.54 283.25 282.96 282.67 282.38 282.10 281.81
283.51 283.51 283.12 283.49 283.40 283.13 282.85 282.57 282.30 282.02 281.74
282.71 282.71 283.16 283.49 283.34 283.07 282.80 282.53 282.25 281.98 281.71
281.39 281.39 282.53 283.41 283.31 283.04 282.77 282.50 282.23 281.97 281.70
282.14 282.14 282.49 283.23 283.18 282.92 282.67 282.41 282.15 281.89 281.63
281.30 281.30 282.19 283.10 283.05 282.81 282.56 282.31 282.07 281.82 281.57
281.57 281.57 282.11 282.95 282.93 282.69 282.46 282.22 281.98 281.75 281.51
281.38 281.38 281.98 282.82 282.81 282.58 282.36 282.13 281.90 281.68 281.45
282.03 282.03 282.20 282.73 282.70 282.48 282.27 282.05 281.83 281.62 281.40
281.28 281.28 281.92 282.67 282.63 282.42 282.21 282.00 281.79 281.58 281.37
279.87 279.87 281.30 282.54 282.55 282.35 282.14 281.94 281.73 281.53 281.33
279.82 279.82 280.88 282.29 282.39 282.20 282.01 281.82 281.63 281.44 281.25
280.27 280.27 280.93 282.08 282.20 282.02 281.85 281.67 281.50 281.33 281.15
278.94 278.94 280.40 281.92 282.05 281.88 281.72 281.56 281.40 281.24 281.08
279.14 279.14 280.21 281.70 281.88 281.73 281.58 281.44 281.29 281.14 280.99
278.28 278.28 279.78 281.49 281.70 281.57 281.44 281.30 281.17 281.04 280.91
277.82 277.82 279.28 281.23 281.50 281.38 281.27 281.15 281.04 280.92 280.81
278.23 278.23 279.21 280.97 281.27 281.17 281.08 280.98 280.89 280.79 280.70
278.79 278.79 279.40 280.80 281.08 281.00 280.92 280.84 280.77 280.69 280.61
279.15 279.15 279.58 280.73 280.97 280.90 280.83 280.76 280.69 280.62 280.55
279.15 279.15 279.68 280.70 280.90 280.84 280.77 280.71 280.65 280.58 280.52
279.10 279.10 279.66 280.67 280.86 280.80 280.74 280.68 280.62 280.56 280.50
278.31 278.31 279.38 280.62 280.81 280.75 280.70 280.64 280.59 280.53 280.47
277.85 277.85 278.98 280.48 280.72 280.67 280.63 280.58 280.53 280.48 280.43
277.66 277.66 278.81 280.32 280.59 280.55 280.52 280.48 280.44 280.40 280.37
278.15 278.15 278.78 280.16 280.45 280.43 280.40 280.37 280.35 280.32 280.30
278.17 278.17 278.84 280.06 280.34 280.32 280.30 280.29 280.27 280.26 280.24
278.33 278.33 278.87 280.00 280.26 280.25 280.24 280.23 280.22 280.21 280.20
278.46 278.46 278.96 279.96 280.20 280.20 280.19 280.19 280.18 280.18 280.17
278.71 278.71 279.04 279.94 280.16 280.16 280.16 280.16 280.16 280.16 280.16
278.95 278.95 279.22 279.94 280.14 280.14 280.14 280.14 280.14 280.14 280.14
278.66 278.66 279.15 279.96 280.14 280.14 280.14 280.14 280.14 280.14 280.14
279.21 279.21 279.31 279.95 280.13 280.13 280.13 280.13 280.14 280.14 280.14
278.71 278.71 279.27 279.98 280.13 280.13 280.13 280.13 280.14 280.14 280.14
279.53 279.53 279.42 279.97 280.12 280.12 280.13 280.13 280.13 280.13 280.14
279.78 279.78 279.72 280.02 280.13 280.13 280.13 280.14 280.14 280.14 280.14
279.84 279.84 279.84 280.10 280.18 280.18 280.18 280.17 280.17 280.17 280.17
279.77 279.77 279.87 280.16 280.23 280.22 280.22 280.21 280.20 280.20 280.19
279.65 279.65 279.85 280.20 280.27 280.26 280.25 280.24 280.23 280.22 280.21
279.40 279.40 279.74 280.21 280.29 280.28 280.26 280.25 280.24 280.23 280.22
279.30 279.30 279.66 280.19 280.28 280.27 280.26 280.25 280.24 280.23 280.22
278.58 278.58 279.43 280.16 280.27 280.26 280.25 280.24 280.23 280.22 280.21
277.69 277.69 278.93 280.05 280.21 280.21 280.20 280.20 280.19 280.19 280.18
277.77 277.77 278.61 279.87 280.10 280.10 280.11 280.11 280.12 280.12 280.12
277.96 277.96 278.63 279.71 279.96 279.97 279.99 280.01 280.02 280.04 280.06
277.72 277.72 278.50 279.60 279.85 279.87 279.90 279.93 279.95 279.98 280.00
277.50 277.50 278.32 279.49 279.75 279.79 279.82 279.85 279.89 279.92 279.96
277.14 277.14 278.17 279.38 279.65 279.69 279.73 279.78 279.82 279.86 279.90
276.24 276.24 277.68 279.24 279.55 279.60 279.65 279.70 279.75 279.80 279.85
276.07 276.07 277.33 279.03 279.40 279.46 279.53 279.59 279.65 279.72 279.78
276.41 276.41 277.27 278.83 279.22 279.30 279.38 279.46 279.54 279.62 279.70
276.64 276.64 277.34 278.68 279.07 279.16 279.25 279.35 279.44 279.53 279.62
276.12 276.12 277.18 278.58 278.96 279.06 279.16 279.26 279.36 279.46 279.57
275.07 275.07 276.62 278.44 278.86 278.97 279.08 279.19 279.30 279.41 279.52
274.75 274.75 276.21 278.22 278.70 278.82 278.95 279.07 279.19 279.32 279.44
274.77 274.77 276.05 278.00 278.51 278.65 278.79 278.93 279.07 279.21 279.35
274.98 274.98 276.01 277.82 278.33 278.49 278.64 278.80 278.95 279.11 279.26
275.38 275.38 276.12 277.69 278.19 278.36 278.53 278.69 278.86 279.03 279.19
275.81 275.81 276.32 277.62 278.09 278.26 278.44 278.61 278.79 278.96 279.14
274.90 274.90 276.04 277.57 278.03 278.21 278.39 278.57 278.75 278.93 279.11
274.45 274.45 275.72 277.46 277.95 278.14 278.33 278.51 278.70 278.89 279.07
274.02 274.02 275.38 277.29 277.83 278.03 278.22 278.42 278.62 278.82 279.01
274.47 274.47 275.31 277.11 277.68 277.89 278.10 278.31 278.52 278.73 278.94
274.71 274.71 275.49 277.01 277.55 277.77 277.99 278.21 278.44 278.66 278.88
275.16 275.16 275.64 276.97 277.48 277.71 277.93 278.16 278.39 278.62 278.84
274.38 274.38 275.49 276.95 277.44 277.67 277.90 278.13 278.36 278.59 278.82
274.10 274.10 275.17 276.86 277.39 277.62 277.86 278.09 278.33 278.56 278.80
273.95 273.95 275.06 276.75 277.29 277.54 277.78 278.02 278.27 278.51 278.75
273.60 273.60 274.81 276.63 277.20 277.45 277.70 277.95 278.20 278.45 278.71
273.52 273.52 274.66 276.49 277.09 277.35 277.61 277.87 278.13 278.39 278.65
273.54 273.54 274.59 276.38 276.98 277.25 277.52 277.79 278.06 278.33 278.60
273.50 273.50 274.53 276.28 276.88 277.16 277.44 277.72 277.99 278.27 278.55
273.47 273.47 274.47 276.20 276.80 277.09 277.37 277.66 277.94 278.23 278.51
273.40 273.40 274.40 276.12 276.72 277.02 277.31 277.60 277.89 278.18 278.47
273.38 273.38 274.35 276.04 276.64 276.94 277.24 277.54 277.84 278.13 278.43
273.37 273.37 274.32 275.97 276.57 276.88 277.18 277.49 277.79 278.10 278.40
273.35 273.35 274.28 275.90 276.50 276.81 277.12 277.43 277.74 278.06 278.37
273.29 273.29 274.22 275.83 276.43 276.75 277.07 277.38 277.70 278.02 278.33
273.25 273.25 274.17 275.76 276.37 276.69 277.01 277.33 277.65 277.98 278.30
273.24 273.24 274.13 275.70 276.31 276.63 276.96 277.29 277.61 277.94 278.27
273.24 273.24 274.10 275.65 276.25 276.58 276.92 277.25 277.58 277.91 278.24
273.24 273.24 274.08 275.59 276.20 276.53 276.87 277.21 277.54 277.88 278.22
273.24 273.24 274.06 275.55 276.15 276.49 276.83 277.17 277.51 277.85 278.19
273.25 273.25 274.04 275.50 276.10 276.45 276.79 277.13 277.48 277.82 278.17
273.28 273.28 274.04 275.46 276.06 276.40 276.75 277.10 277.45 277.80 278.15
273.29 273.29 274.03 275.43 276.02 276.37 276.72 277.07 277.42 277.78 278.13
273.25 273.25 274.01 275.38 275.97 276.33 276.68 277.04 277.39 277.75 278.11
273.27 273.27 273.99 275.35 275.94 276.30 276.66 277.01 277.37 277.73 278.09
273.09 273.09 273.89 275.30 275.89 276.25 276.62 276.98 277.34 277.70 278.07
273.04 273.04 273.82 275.26 275.85 276.22 276.58 276.95 277.32 277.68 278.05
273.11 273.11 273.84 275.22 275.81 276.18 276.55 276.92 277.29 277.66 278.03
273.19 273.19 273.89 275.20 275.79 276.16 276.53 276.90 277.27 277.64 278.01
273.09 273.09 273.84 275.17 275.76 276.13 276.51 276.88 277.25 277.63 278.00
273.09 273.09 273.84 275.17 275.76 276.13 276.51 276.88 277.25 277.63 278.00
272.95 272.95 273.68 274.88 275.45 275.85 276.25 276.65 277.05 277.45 277.85
272.95 272.95 273.68 274.88 275.45 275.85 276.25 276.65 277.05 277.45 277.85
272.95 272.95 273.68 274.88 275.45 275.85 276.25 276.65 277.05 277.45 277.85
272.95 272.95 273.65 274.82 275.41 275.81 276.21 276.62 277.02 277.43 277.83
272.95 272.95 273.65 274.78 275.36 275.76 276.17 276.58 276.99 277.40 277.80
272.95 272.95 273.65 274.78 275.36 275.76 276.17 276.58 276.99 277.40 277.80
272.95 272.95 273.65 274.78 275.36 275.76 276.17 276.58 276.99 277.40 277.80
272.95 272.95 273.65 274.77 275.33 275.74 276.15 276.56 276.97 277.38 277.79
272.95 272.95 273.65 274.72 275.26 275.68 276.09 276.51 276.93 277.34 277.76
272.95 272.95 273.65 274.72 275.26 275.68 276.09 276.51 276.93 277.34 277.76
272.95 272.95 273.64 274.70 275.26 275.68 276.09 276.51 276.93 277.34 277.76
272.95 272.95 273.56 274.68 275.26 275.68 276.09 276.51 276.93 277.34 277.76
272.92 272.92 273.55 274.62 275.18 275.60 276.02 276.45 276.87 277.29 277.72
272.90 272.90 273.55 274.62 275.17 275.59 276.02 276.44 276.86 277.29 277.71
272.92 272.92 273.55 274.62 275.17 275.59 276.02 276.44 276.86 277.29 277.71
272.95 272.95 273.55 274.62 275.17 275.59 276.02 276.44 276.86 277.29 277.71
272.88 272.88 273.53 274.57 275.13 275.56 275.99 276.41 276.84 277.27 277.69
272.85 272.85 273.52 274.52 275.07 275.51 275.94 276.37 276.80 277.23 277.67
272.85 272.85 273.52 274.52 275.07 275.51 275.94 276.37 276.80 277.23 277.67
272.86 272.86 273.52 274.52 275.07 275.51 275.94 276.37 276.80 277.23 277.67
272.85 272.85 273.53 274.52 275.07 275.51 275.94 276.37 276.80 277.23 277.67
272.85 272.85 273.58 274.51 275.07 275.50 275.93 276.37 276.80 277.23 277.66
272.88 272.88 273.58 274.48 275.02 275.46 275.89 276.33 276.77 277.20 277.64
272.95 272.95 273.58 274.52 275.07 275.51 275.94 276.37 276.80 277.23 277.67
272.95 272.95 273.58 274.52 275.07 275.51 275.94 276.37 276.80 277.23 277.67
272.95 272.95 273.58 274.49 275.04 275.48 275.91 276.35 276.78 277.22 277.65
272.95 272.95 273.58 274.45 274.98 275.42 275.86 276.30 276.74 277.18 277.62
272.95 272.95 273.57 274.45 274.98 275.42 275.86 276.30 276.74 277.18 277.62
272.95 272.95 273.52 274.45 274.98 275.42 275.86 276.30 276.74 277.18 277.62
272.95 272.95 273.52 274.45 274.98 275.42 275.86 276.30 276.74 277.18 277.62
272.90 272.90 273.49 274.42 274.98 275.42 275.86 276.30 276.74 277.18 277.62
272.95 272.95 273.49 274.42 274.98 275.42 275.86 276.30 276.74 277.18 277.62
272.91 272.91 273.48 274.38 274.93 275.38 275.82 276.26 276.71 277.15 277.60
272.85 272.85 273.48 274.35 274.89 275.33 275.78 276.23 276.68 277.13 277.57
272.85 272.85 273.48 274.35 274.89 275.33 275.78 276.23 276.68 277.13 277.57
272.85 272.85 273.48 274.35 274.89 275.33 275.78 276.23 276.68 277.13 277.57
272.85 272.85 273.48 274.35 274.88 275.33 275.78 276.23 276.68 277.12 277.57
272.85 272.85 273.48 274.32 274.84 275.29 275.74 276.19 276.65 277.10 277.55
272.85 272.85 273.48 274.28 274.79 275.25 275.70 276.16 276.62 277.07 277.53
272.85 272.85 273.48 274.28 274.79 275.25 275.70 276.16 276.62 277.07 277.53
272.85 272.85 273.48 274.28 274.79 275.25 275.70 276.16 276.62 277.07 277.53
272.86 272.86 273.48 274.28 274.79 275.25 275.70 276.16 276.62 277.07 277.53
272.95 272.95 273.48 274.28 274.79 275.25 275.70 276.16 276.62 277.07 277.53
272.95 272.95 273.48 274.28 274.79 275.25 275.70 276.16 276.62 277.07 277.53
272.95 272.95 273.48 274.28 274.79 275.25 275.70 276.16 276.62 277.07 277.53
272.95 272.95 273.48 274.28 274.79 275.25 275.70 276.16 276.62 277.07 277.53
272.93 272.93 273.45 274.25 274.79 275.25 275.70 276.16 276.62 277.07 277.53
272.85 272.85 273.45 274.19 274.71 275.17 275.64 276.10 276.56 277.03 277.49
272.85 272.85 273.45 274.18 274.70 275.16 275.63 276.09 276.55 277.02 277.48
272.94 272.94 273.45 274.23 274.77 275.23 275.68 276.14 276.60 277.06 277.52
272.95 272.95 273.45 274.23 274.77 275.23 275.68 276.14 276.60 277.06 277.52
272.95 272.95 273.45 274.20 274.72 275.18 275.64 276.11 276.57 277.03 277.49
272.95 272.95 273.45 274.18 274.70 275.16 275.63 276.09 276.55 277.02 277.48
272.95 272.95 273.45 274.18 274.70 275.16 275.63 276.09 276.55 277.02 277.48
272.95 272.95 273.45 274.18 274.70 275.16 275.63 276.09 276.55 277.02 277.48
272.94 272.94 273.45 274.18 274.70 275.16 275.63 276.09 276.55 277.02 277.48
272.85 272.85 273.45 274.18 274.69 275.16 275.62 276.09 276.55 277.02 277.48
272.85 272.85 273.44 274.14 274.64 275.11 275.58 276.05 276.52 276.99 277.46
272.85 272.85 273.43 274.10 274.61 275.08 275.55 276.02 276.49 276.97 277.44
272.95 272.95 273.38 274.24 274.81 275.27 275.72 276.18 276.63 277.08 277.54
272.95 272.95 273.38 274.23 274.80 275.25 275.71 276.16 276.62 277.08 277.53
272.95 272.95 273.37 274.21 274.78 275.23 275.69 276.15 276.61 277.06 277.52
272.95 272.95 273.37 274.19 274.76 275.21 275.67 276.13 276.59 277.05 277.51
272.95 272.95 273.37 274.18 274.73 275.19 275.65 276.12 276.58 277.04 277.50
272.95 272.95 273.37 274.16 274.71 275.17 275.64 276.10 276.56 277.03 277.49
272.96 272.96 273.37 274.14 274.69 275.16 275.62 276.09 276.55 277.01 277.48
272.97 272.97 273.37 274.13 274.67 275.14 275.61 276.07 276.54 277.00 277.47
272.96 272.96 273.36 274.11 274.65 275.12 275.59 276.05 276.52 276.99 277.46
272.97 272.97 273.37 274.10 274.64 275.11 275.57 276.04 276.51 276.98 277.45
272.97 272.97 273.37 274.09 274.62 275.09 275.56 276.03 276.50 276.97 277.44
272.97 272.97 273.36 274.08 274.61 275.08 275.56 276.03 276.50 276.97 277.44
272.97 272.97 273.36 274.08 274.61 275.08 275.55 276.02 276.50 276.97 277.44
272.97 272.97 273.36 274.18 274.75 275.21 275.67 276.13 276.59 277.05 277.51
272.97 272.97 273.36 274.18 274.75 275.21 275.67 276.13 276.59 277.05 277.51
272.98 272.98 273.36 274.18 274.75 275.21 275.67 276.13 276.59 277.05 277.51
272.95 272.95 273.36 274.17 274.74 275.20 275.66 276.12 276.58 277.04 277.50
272.95 272.95 273.36 274.16 274.73 275.19 275.65 276.12 276.58 277.04 277.50
272.95 272.95 273.36 274.15 274.72 275.18 275.65 276.11 276.57 277.03 277.49
272.95 272.95 273.35 274.14 274.71 275.17 275.64 276.10 276.56 277.03 277.49
272.95 272.95 273.35 274.13 274.70 275.17 275.63 276.09 276.56 277.02 277.48
272.95 272.95 273.35 274.12 274.69 275.16 275.62 276.09 276.55 277.01 277.48
272.95 272.95 273.34 274.11 274.68 275.15 275.61 276.08 276.54 277.01 277.47
272.95 272.95 273.34 274.10 274.67 275.14 275.60 276.07 276.54 277.00 277.47
272.95 272.95 273.34 274.09 274.66 275.13 275.60 276.06 276.53 277.00 277.46
272.95 272.95 273.33 274.08 274.65 275.12 275.59 276.06 276.52 276.99 277.46
272.95 272.95 273.33 274.07 274.64 275.11 275.58 276.05 276.52 276.99 277.45
272.95 272.95 273.33 274.06 274.63 275.10 275.57 276.04 276.51 276.98 277.45
272.95 272.95 273.33 274.05 274.62 275.09 275.56 276.03 276.50 276.97 277.44
272.95 272.95 273.32 274.04 274.61 275.08 275.55 276.03 276.50 276.97 277.44
272.95 272.95 273.32 274.03 274.60 275.07 275.55 276.02 276.49 276.96 277.43
272.95 272.95 273.32 274.02 274.59 275.06 275.54 276.01 276.48 276.96 277.43
272.95 272.95 273.31 274.01 274.58 275.05 275.53 276.00 276.48 276.95 277.42
272.95 272.95 273.31 274.00 274.57 275.05 275.52 276.00 276.47 276.94 277.42
272.95 272.95 273.31 273.99 274.56 275.04 275.51 275.99 276.46 276.94 277.41
272.95 272.95 273.31 273.98 274.55 275.03 275.50 275.98 276.46 276.93 277.41
272.95 272.95 273.30 273.97 274.54 275.02 275.50 275.97 276.45 276.93 277.40
272.92 272.92 273.23 273.97 274.53 275.01 275.49 275.97 276.44 276.92 277.40
272.92 272.92 273.22 273.96 274.52 275.00 275.48 275.96 276.44 276.91 277.39
272.92 272.92 273.22 273.95 274.51 274.99 275.47 275.95 276.43 276.91 277.39
272.92 272.92 273.22 273.94 274.50 274.98 275.46 275.94 276.42 276.90 277.38
272.92 272.92 273.21 273.93 274.49 274.97 275.45 275.94 276.42 276.90 277.38
272.93 272.93 273.22 273.93 274.50 274.98 275.46 275.94 276.42 276.90 277.38
272.93 272.93 273.22 273.94 274.50 274.98 275.46 275.94 276.42 276.90 277.38
273.00 273.00 273.24 273.93 274.49 274.97 275.45 275.93 276.42 276.90 277.38
273.66 273.66 273.56 273.94 274.49 274.97 275.45 275.93 276.41 276.90 277.38
274.98 274.98 274.04 274.01 274.52 275.00 275.48 275.96 276.44 276.92 277.40
276.60 276.60 274.89 274.20 274.61 275.09 275.56 276.03 276.50 276.97 277.44
277.25 277.25 275.78 274.54 274.81 275.26 275.71 276.17 276.62 277.08 277.53
277.15 277.15 275.86 274.86 275.07 275.50 275.94 276.37 276.80 277.23 277.67
277.00 277.00 276.24 275.14 275.30 275.72 276.13 276.54 276.95 277.37 277.78
278.87 278.87 276.67 275.36 275.52 275.91 276.30 276.70 277.09 277.49 277.88
280.45 280.45 277.84 275.71 275.73 276.11 276.48 276.86 277.24 277.61 277.99
281.13 281.13 278.59 276.16 276.07 276.42 276.76 277.11 277.46 277.81 278.15
281.87 281.87 279.32 276.65 276.46 276.77 277.09 277.40 277.71 278.03 278.34
282.88 282.88 280.09 277.15 276.86 277.14 277.42 277.70 277.98 278.26 278.54
283.76 283.76 280.96 277.68 277.29 277.54 277.78 278.02 278.27 278.51 278.75
283.65 283.65 281.27 278.19 277.74 277.95 278.15 278.36 278.56 278.77 278.97
283.06 283.06 281.28 278.58 278.14 278.31 278.48 278.65 278.82 278.99 279.16
282.70 282.70 281.22 278.85 278.44 278.59 278.73 278.88 279.02 279.17 279.31
281.77 281.77 280.89 279.02 278.67 278.79 278.92 279.04 279.17 279.30 279.42
280.27 280.27 280.20 279.07 278.80 278.92 279.03 279.15 279.26 279.38 279.49
279.44 279.44 279.55 278.97 278.82 278.93 279.05 279.16 279.27 279.39 279.50
279.58 279.58 279.36 278.82 278.76 278.88 278.99 279.11 279.23 279.35 279.47
279.52 279.52 279.18 278.71 278.68 278.81 278.93 279.06 279.18 279.31 279.43
280.03 280.03 279.26 278.53 278.47 278.61 278.76 278.90 279.04 279.18 279.33
280.67 280.67 279.56 278.54 278.45 278.59 278.74 278.88 279.03 279.17 279.32
281.43 281.43 279.97 278.63 278.49 278.63 278.77 278.91 279.05 279.20 279.34
282.17 282.17 280.45 278.78 278.58 278.72 278.85 278.98 279.12 279.25 279.38
282.84 282.84 281.03 278.99 278.73 278.85 278.97 279.09 279.21 279.33 279.45
283.10 283.10 281.37 279.25 278.92 279.03 279.13 279.23 279.34 279.44 279.55
283.75 283.75 281.88 279.52 279.14 279.22 279.31 279.40 279.48 279.57 279.65
284.08 284.08 282.28 279.81 279.38 279.44 279.51 279.57 279.64 279.71 279.77
283.69 283.69 282.31 280.07 279.61 279.66 279.70 279.75 279.79 279.84 279.89
282.86 282.86 282.06 280.23 279.80 279.83 279.86 279.89 279.92 279.95 279.98
282.71 282.71 281.81 280.28 279.91 279.93 279.95 279.97 279.99 280.01 280.03
282.79 282.79 281.81 280.30 279.96 279.98 280.00 280.01 280.03 280.04 280.06
282.57 282.57 281.76 280.37 280.05 280.06 280.07 280.08 280.08 280.09 280.10
282.62 282.62 281.72 280.39 280.07 280.08 280.08 280.09 280.10 280.10 280.11
282.31 282.31 281.70 280.42 280.11 280.11 280.12 280.12 280.12 280.13 280.13
282.61 282.61 281.65 280.43 280.14 280.15 280.15 280.15 280.15 280.15 280.15
282.98 282.98 281.96 280.48 280.18 280.18 280.18 280.17 280.17 280.17 280.17
282.76 282.76 281.90 280.56 280.26 280.25 280.24 280.23 280.22 280.21 280.20
283.26 283.26 282.15 280.64 280.33 280.31 280.30 280.28 280.27 280.25 280.24
282.81 282.81 282.05 280.74 280.41 280.39 280.37 280.34 280.32 280.30 280.28
282.85 282.85 282.08 280.79 280.48 280.45 280.42 280.39 280.36 280.34 280.31
282.57 282.57 281.98 280.83 280.52 280.49 280.46 280.43 280.39 280.36 280.33
282.45 282.45 281.90 280.84 280.56 280.53 280.49 280.46 280.42 280.39 280.35
282.50 282.50 281.81 280.85 280.59 280.55 280.51 280.47 280.44 280.40 280.36
282.88 282.88 282.06 280.87 280.60 280.56 280.52 280.48 280.45 280.41 280.37
282.56 282.56 281.95 280.92 280.64 280.60 280.56 280.52 280.47 280.43 280.39
282.80 282.80 281.98 280.94 280.67 280.63 280.58 280.54 280.49 280.45 280.40
284.79 284.79 282.73 281.01 280.71 280.66 280.61 280.57 280.52 280.47 280.42
285.85 285.85 283.75 281.28 280.84 280.79 280.73 280.67 280.61 280.55 280.49
285.24 285.24 283.88 281.62 281.10 281.02 280.94 280.86 280.78 280.70 280.61
285.56 285.56 284.05 281.86 281.33 281.23 281.13 281.03 280.93 280.83 280.73
285.45 285.45 284.16 282.06 281.52 281.41 281.29 281.17 281.05 280.94 280.82
285.35 285.35 284.11 282.21 281.69 281.56 281.42 281.29 281.16 281.03 280.90
285.74 285.74 284.26 282.34 281.81 281.67 281.53 281.39 281.25 281.11 280.96
286.33 286.33 284.60 282.49 281.95 281.79 281.64 281.49 281.33 281.18 281.03
286.54 286.54 284.87 282.69 282.10 281.94 281.77 281.60 281.44 281.27 281.11
286.75 286.75 285.02 282.88 282.28 282.10 281.92 281.74 281.55 281.37 281.19
287.11 287.11 285.23 283.06 282.44 282.25 282.05 281.86 281.66 281.47 281.27
287.15 287.15 285.41 283.24 282.62 282.41 282.20 281.99 281.78 281.57 281.36
286.44 286.44 285.43 283.63 283.06 282.81 282.57 282.32 282.07 281.82 281.57
285.21 285.21 284.98 283.72 283.19 282.93 282.67 282.42 282.16 281.90 281.64
285.09 285.09 284.67 283.68 283.23 282.96 282.70 282.44 282.18 281.92 281.66
285.25 285.25 284.58 283.60 283.18 282.92 282.66 282.41 282.15 281.89 281.63
285.50 285.50 284.60 283.55 283.14 282.88 282.63 282.38 282.12 281.87 281.61
285.65 285.65 284.68 283.54 283.13 282.87 282.62 282.37 282.11 281.86 281.61
285.86 285.86 284.78 283.58 283.15 282.90 282.64 282.38 282.13 281.87 281.62
286.02 286.02 284.94 283.65 283.20 282.94 282.68 282.42 282.16 281.90 281.64
286.02 286.02 285.01 283.73 283.27 283.00 282.74 282.47 282.21 281.94 281.68
285.79 285.79 284.97 283.78 283.32 283.05 282.78 282.51 282.24 281.97 281.70
285.81 285.81 285.00 283.82 283.36 283.09 282.81 282.54 282.27 281.99 281.72
285.70 285.70 284.97 283.88 283.42 283.14 282.87 282.59 282.31 282.03 281.75
285.81 285.81 284.99 283.89 283.44 283.16 282.88 282.60 282.32 282.04 281.76
285.95 285.95 285.03 283.91 283.46 283.18 282.90 282.62 282.33 282.05 281.77
286.18 286.18 285.13 283.93 283.47 283.19 282.91 282.62 282.34 282.06 281.78
286.52 286.52 285.26 283.98 283.51 283.23 282.94 282.65 282.37 282.08 281.80
287.02 287.02 285.48 284.06 283.57 283.27 282.98 282.69 282.40 282.11 281.82
287.49 287.49 285.78 284.17 283.64 283.34 283.04 282.75 282.45 282.15 281.86
288.01 288.01 286.08 284.33 283.76 283.45 283.14 282.84 282.53 282.22 281.92
288.49 288.49 286.47 284.54 283.92 283.60 283.28 282.96 282.64 282.32 281.99
288.35 288.35 286.68 284.72 284.05 283.72 283.39 283.06 282.72 282.39 282.06
287.11 287.11 286.44 284.83 284.15 283.81 283.47 283.13 282.79 282.45 282.11
286.83 286.83 286.13 284.86 284.24 283.89 283.54 283.20 282.85 282.50 282.15
287.38 287.38 286.15 284.85 284.27 283.92 283.57 283.22 282.87 282.52 282.17
287.85 287.85 286.35 284.88 284.30 283.94 283.59 283.24 282.88 282.53 282.18
288.18 288.18 286.53 284.96 284.36 284.00 283.64 283.28 282.93 282.57 282.21
288.63 288.63 286.79 285.07 284.44 284.07 283.71 283.34 282.98 282.61 282.25
288.67 288.67 286.97 285.25 284.61 284.23 283.85 283.47 283.09 282.71 282.33
288.75 288.75 287.11 285.45 284.82 284.42 284.03 283.63 283.23 282.83 282.44
288.48 288.48 287.25 285.66 285.01 284.60 284.18 283.77 283.35 282.94 282.53
287.84 287.84 287.08 285.69 285.03 284.61 284.20 283.78 283.37 282.95 282.54
287.36 287.36 286.79 285.61 284.97 284.56 284.15 283.74 283.33 282.92 282.51
287.36 287.36 286.63 285.54 284.94 284.54 284.13 283.72 283.31 282.90 282.50
287.54 287.54 286.61 285.51 284.94 284.53 284.12 283.71 283.31 282.90 282.49
287.59 287.59 286.63 285.49 284.91 284.50 284.10 283.69 283.29 282.88 282.48
287.88 287.88 286.68 285.47 284.89 284.48 284.08 283.68 283.28 282.87 282.47
287.87 287.87 286.76 285.49 284.90 284.49 284.09 283.69 283.28 282.88 282.47
287.97 287.97 286.78 285.52 284.92 284.52 284.11 283.70 283.30 282.89 282.48
288.52 288.52 287.01 285.63 285.02 284.61 284.19 283.78 283.36 282.95 282.53
289.10 289.10 287.30 285.71 285.05 284.63 284.22 283.80 283.38 282.97 282.55
289.52 289.52 287.57 285.81 285.12 284.69 284.27 283.85 283.43 283.00 282.58
289.30 289.30 287.73 285.94 285.21 284.78 284.35 283.92 283.49 283.06 282.63
288.53 288.53 287.54 286.03 285.32 284.88 284.44 284.00 283.56 283.12 282.68
288.60 288.60 287.44 286.06 285.38 284.94 284.49 284.05 283.60 283.16 282.71
289.01 289.01 287.54 286.08 285.42 284.97 284.52 284.07 283.62 283.17 282.73
289.34 289.34 287.68 286.13 285.45 285.00 284.55 284.10 283.65 283.20 282.75
289.43 289.43 287.81 286.20 285.51 285.05 284.60 284.14 283.68 283.23 282.77
289.24 289.24 287.85 286.27 285.57 285.11 284.65 284.19 283.72 283.26 282.80
288.66 288.66 287.67 286.31 285.62 285.15 284.69 284.22 283.76 283.29 282.83
287.93 287.93 287.41 286.29 285.64 285.18 284.71 284.24 283.77 283.31 282.84
287.36 287.36 287.05 286.22 285.62 285.16 284.69 284.22 283.76 283.29 282.83
287.44 287.44 286.87 286.11 285.55 285.09 284.63 284.17 283.71 283.25 282.79
287.74 287.74 286.86 286.06 285.54 285.08 284.62 284.16 283.70 283.25 282.79
288.24 288.24 287.07 286.05 285.50 285.05 284.59 284.14 283.68 283.22 282.77
288.09 288.09 287.12 286.05 285.49 285.03 284.58 284.12 283.67 283.22 282.76
288.53 288.53 287.24 286.13 285.54 285.08 284.63 284.17 283.71 283.25 282.79
288.49 288.49 287.42 286.22 285.60 285.14 284.67 284.21 283.74 283.28 282.82
287.77 287.77 287.25 286.23 285.62 285.15 284.69 284.22 283.76 283.29 282.83
287.48 287.48 287.05 286.20 285.61 285.15 284.68 284.22 283.75 283.29 282.82
287.03 287.03 286.80 286.13 285.58 285.12 284.66 284.20 283.73 283.27 282.81
287.09 287.09 286.64 286.03 285.52 285.06 284.60 284.15 283.69 283.23 282.78
286.92 286.92 286.51 285.94 285.44 284.99 284.54 284.09 283.64 283.19 282.74
286.88 286.88 286.38 285.84 285.36 284.91 284.47 284.03 283.58 283.14 282.70
287.04 287.04 286.37 285.75 285.28 284.84 284.41 283.97 283.53 283.10 282.66
287.49 287.49 286.45 285.70 285.21 284.78 284.35 283.92 283.49 283.06 282.63
287.75 287.75 286.63 285.72 285.21 284.78 284.35 283.92 283.49 283.06 282.63
287.80 287.80 286.82 285.82 285.27 284.84 284.40 283.96 283.53 283.09 282.66
287.39 287.39 286.72 285.85 285.29 284.86 284.42 283.98 283.54 283.10 282.67
287.21 287.21 286.64 285.84 285.30 284.86 284.43 283.99 283.55 283.11 282.67
286.80 286.80 286.46 285.81 285.29 284.85 284.42 283.98 283.54 283.10 282.67
287.12 287.12 286.40 285.75 285.25 284.82 284.38 283.95 283.51 283.08 282.65
287.31 287.31 286.49 285.72 285.22 284.79 284.36 283.93 283.49 283.06 282.63
287.38 287.38 286.53 285.73 285.21 284.78 284.35 283.92 283.49 283.06 282.63
287.25 287.25 286.53 285.74 285.22 284.79 284.36 283.93 283.49 283.06 282.63
287.43 287.43 286.54 285.74 285.22 284.79 284.36 283.93 283.49 283.06 282.63
288.17 288.17 286.74 285.75 285.23 284.79 284.36 283.93 283.50 283.07 282.63
288.24 288.24 286.97 285.82 285.26 284.83 284.39 283.96 283.52 283.09 282.65
287.47 287.47 286.89 285.90 285.32 284.88 284.44 284.00 283.56 283.12 282.68
287.01 287.01 286.65 285.91 285.36 284.91 284.47 284.03 283.58 283.14 282.70
286.92 286.92 286.54 285.87 285.35 284.91 284.47 284.02 283.58 283.14 282.70
286.70 286.70 286.44 285.85 285.35 284.91 284.46 284.02 283.58 283.14 282.69
286.73 286.73 286.37 285.81 285.32 284.88 284.44 284.00 283.56 283.12 282.68
286.63 286.63 286.32 285.76 285.28 284.84 284.41 283.97 283.53 283.10 282.66
286.60 286.60 286.24 285.72 285.24 284.81 284.37 283.94 283.51 283.07 282.64
286.68 286.68 286.20 285.67 285.20 284.77 284.34 283.91 283.48 283.05 282.62
286.57 286.57 286.19 285.64 285.17 284.75 284.32 283.89 283.46 283.04 282.61
286.26 286.26 286.05 285.61 285.15 284.72 284.30 283.87 283.45 283.02 282.60
286.32 286.32 285.98 285.56 285.11 284.69 284.27 283.85 283.42 283.00 282.58
286.36 286.36 285.97 285.51 285.07 284.65 284.23 283.81 283.39 282.97 282.56
286.14 286.14 285.91 285.48 285.04 284.62 284.21 283.79 283.37 282.96 282.54
285.98 285.98 285.79 285.43 285.01 284.59 284.18 283.77 283.35 282.94 282.53
285.82 285.82 285.70 285.38 284.96 284.55 284.15 283.74 283.33 282.92 282.51
285.84 285.84 285.62 285.32 284.92 284.51 284.11 283.70 283.30 282.89 282.48
285.60 285.60 285.53 285.28 284.88 284.47 284.07 283.67 283.27 282.87 282.46
286.20 286.20 285.62 285.23 284.84 284.44 284.04 283.64 283.24 282.84 282.44
285.67 285.67 285.62 285.23 284.81 284.41 284.02 283.62 283.22 282.83 282.43
285.48 285.48 285.42 285.20 284.80 284.41 284.01 283.61 283.22 282.82 282.43
284.73 284.73 285.13 285.13 284.76 284.37 283.98 283.58 283.19 282.80 282.41
284.32 284.32 284.77 285.00 284.68 284.29 283.91 283.52 283.14 282.75 282.37
284.81 284.81 284.72 284.84 284.56 284.18 283.81 283.43 283.06 282.68 282.31
285.25 285.25 284.96 284.78 284.47 284.10 283.73 283.36 283.00 282.63 282.26
284.98 284.98 284.99 284.78 284.44 284.07 283.71 283.34 282.98 282.61 282.25
283.89 283.89 284.49 284.74 284.42 284.06 283.70 283.33 282.97 282.60 282.24
282.85 282.85 283.92 284.59 284.34 283.98 283.63 283.27 282.91 282.56 282.20
282.56 282.56 283.43 284.34 284.18 283.84 283.50 283.15 282.81 282.47 282.12
281.91 281.91 282.98 284.08 283.98 283.66 283.33 283.01 282.68 282.35 282.03
283.21 283.21 283.21 283.85 283.78 283.47 283.16 282.85 282.54 282.23 281.92
282.45 282.45 283.12 283.76 283.64 283.34 283.05 282.75 282.45 282.16 281.86
282.10 282.10 282.79 283.63 283.54 283.25 282.96 282.67 282.38 282.10 281.81
283.51 283.51 283.12 283.49 283.40 283.13 282.85 282.57 282.30 282.02 281.74
282.71 282.71 283.16 283.49 283.34 283.07 282.80 282.53 282.25 281.98 281.71
281.39 281.39 282.53 283.41 283.31 283.04 282.77 282.50 282.23 281.97 281.70
282.14 282.14 282.49 283.23 283.18 282.92 282.67 282.41 282.15 281.89 281.63
281.30 281.30 282.19 283.10 283.05 282.81 282.56 282.31 282.07 281.82 281.57
281.57 281.57 282.11 282.95 282.93 282.69 282.46 282.22 281.98 281.75 281.51
281.38 281.38 281.98 282.82 282.81 282.58 282.36 282.13 281.90 281.68 281.45
282.03 282.03 282.20 282.73 282.70 282.48 282.27 282.05 281.83 281.62 281.40
281.28 281.28 281.92 282.67 282.63 282.42 282.21 282.00 281.79 281.58 281.37
279.87 279.87 281.30 282.54 282.55 282.35 282.14 281.94 281.73 281.53 281.33
279.82 279.82 280.88 282.29 282.39 282.20 282.01 281.82 281.63 281.44 281.25
280.27 280.27 280.93 282.08 282.20 282.02 281.85 281.67 281.50 281.33 281.15
278.94 278.94 280.40 281.92 282.05 281.88 281.72 281.56 281.40 281.24 281.08
279.14 279.14 280.21 281.70 281.88 281.73 281.58 281.44 281.29 281.14 280.99
278.28 278.28 279.78 281.49 281.70 281.57 281.44 281.30 281.17 281.04 280.91
277.82 277.82 279.28 281.23 281.50 281.38 281.27 281.15 281.04 280.92 280.81
278.23 278.23 279.21 280.97 281.27 281.17 281.08 280.98 280.89 280.79 280.70
278.79 278.79 279.40 280.80 281.08 281.00 280.92 280.84 280.77 280.69 280.61
279.15 279.15 279.58 280.73 280.97 280.90 280.83 280.76 280.69 280.62 280.55
279.15 279.15 279.68 280.70 280.90 280.84 280.77 280.71 280.65 280.58 280.52
279.10 279.10 279.66 280.67 280.86 280.80 280.74 280.68 280.62 280.56 280.50
278.31 278.31 279.38 280.62 280.81 280.75 280.70 280.64 280.59 280.53 280.47
277.85 277.85 278.98 280.48 280.72 280.67 280.63 280.58 280.53 280.48 280.43
277.66 277.66 278.81 280.32 280.59 280.55 280.52 280.48 280.44 280.40 280.37
278.15 278.15 278.78 280.16 280.45 280.43 280.40 280.37 280.35 280.32 280.30
278.17 278.17 278.84 280.06 280.34 280.32 280.30 280.29 280.27 280.26 280.24
278.33 278.33 278.87 280.00 280.26 280.25 280.24 280.23 280.22 280.21 280.20
278.46 278.46 278.96 279.96 280.20 280.20 280.19 280.19 280.18 280.18 280.17
278.71 278.71 279.04 279.94 280.16 280.16 280.16 280.16 280.16 280.16 280.16
278.95 278.95 279.22 279.94 280.14 280.14 280.14 280.14 280.14 280.14 280.14
278.66 278.66 279.15 279.96 280.14 280.14 280.14 280.14 280.14 280.14 280.14
279.21 279.21 279.31 279.95 280.13 280.13 280.13 280.13 280.14 280.14 280.14
278.71 278.71 279.27 279.98 280.13 280.13 280.13 280.13 280.14 280.14 280.14
279.53 279.53 279.42 279.97 280.12 280.12 280.13 280.13 280.13 280.13 280.14
279.78 279.78 279.72 280.02 280.13 280.13 280.13 280.14 280.14 280.14 280.14
279.84 279.84 279.84 280.10 280.18 280.18 280.18 280.17 280.17 280.17 280.17
279.77 279.77 279.87 280.16 280.23 280.22 280.22 280.21 280.20 280.20 280.19
279.65 279.65 279.85 280.20 280.27 280.26 280.25 280.24 280.23 280.22 280.21
279.40 279.40 279.74 280.21 280.29 280.28 280.26 280.25 280.24 280.23 280.22
279.30 279.30 279.66 280.19 280.28 280.27 280.26 280.25 280.24 280.23 280.22
278.58 278.58 279.43 280.16 280.27 280.26 280.25 280.24 280.23 280.22 280.21
277.69 277.69 278.93 280.05 280.21 280.21 280.20 280.20 280.19 280.19 280.18
277.77 277.77 278.61 279.87 280.10 280.10 280.11 280.11 280.12 280.12 280.12
277.96 277.96 278.63 279.71 279.96 279.97 279.99 280.01 280.02 280.04 280.06
277.72 277.72 278.50 279.60 279.85 279.87 279.90 279.93 279.95 279.98 280.00
277.50 277.50 278.32 279.49 279.75 279.79 279.82 279.85 279.89 279.92 279.96
277.14 277.14 278.17 279.38 279.65 279.69 279.73 279.78 279.82 279.86 279.90
276.24 276.24 277.68 279.24 279.55 279.60 279.65 279.70 279.75 279.80 279.85
276.07 276.07 277.33 279.03 279.40 279.46 279.53 279.59 279.65 279.72 279.78
276.41 276.41 277.27 278.83 279.22 279.30 279.38 279.46 279.54 279.62 279.70
276.64 276.64 277.34 278.68 279.07 279.16 279.25 279.35 279.44 279.53 279.62
276.12 276.12 277.18 278.58 278.96 279.06 279.16 279.26 279.36 279.46 279.57
275.07 275.07 276.62 278.44 278.86 278.97 279.08 279.19 279.30 279.41 279.52
274.75 274.75 276.21 278.22 278.70 278.82 278.95 279.07 279.19 279.32 279.44
274.77 274.77 276.05 278.00 278.51 278.65 278.79 278.93 279.07 279.21 279.35
274.98 274.98 276.01 277.82 278.33 278.49 278.64 278.80 278.95 279.11 279.26
275.38 275.38 276.12 277.69 278.19 278.36 278.53 278.69 278.86 279.03 279.19
275.81 275.81 276.32 277.62 278.09 278.26 278.44 278.61 278.79 278.96 279.14
274.90 274.90 276.04 277.57 278.03 278.21 278.39 278.57 278.75 278.93 279.11
274.45 274.45 275.72 277.46 277.95 278.14 278.33 278.51 278.70 278.89 279.07
274.02 274.02 275.38 277.29 277.83 278.03 278.22 278.42 278.62 278.82 279.01
274.47 274.47 275.31 277.11 277.68 277.89 278.10 278.31 278.52 278.73 278.94
274.71 274.71 275.49 277.01 277.55 277.77 277.99 278.21 278.44 278.66 278.88
275.16 275.16 275.64 276.97 277.48 277.71 277.93 278.16 278.39 278.62 278.84
274.38 274.38 275.49 276.95 277.44 277.67 277.90 278.13 278.36 278.59 278.82
274.10 274.10 275.17 276.86 277.39 277.62 277.86 278.09 278.33 278.56 278.80
273.95 273.95 275.06 276.75 277.29 277.54 277.78 278.02 278.27 278.51 278.75
273.60 273.60 274.81 276.63 277.20 277.45 277.70 277.95 278.20 278.45 278.71
273.52 273.52 274.66 276.49 277.09 277.35 277.61 277.87 278.13 278.39 278.65
273.54 273.54 274.59 276.38 276.98 277.25 277.52 277.79 278.06 278.33 278.60
273.50 273.50 274.53 276.28 276.88 277.16 277.44 277.72 277.99 278.27 278.55
273.47 273.47 274.47 276.20 276.80 277.09 277.37 277.66 277.94 278.23 278.51
273.40 273.40 274.40 276.12 276.72 277.02 277.31 277.60 277.89 278.18 278.47
273.38 273.38 274.35 276.04 276.64 276.94 277.24 277.54 277.84 278.13 278.43
273.37 273.37 274.32 275.97 276.57 276.88 277.18 277.49 277.79 278.10 278.40
273.35 273.35 274.28 275.90 276.50 276.81 277.12 277.43 277.74 278.06 278.37
273.29 273.29 274.22 275.83 276.43 276.75 277.07 277.38 277.70 278.02 278.33
273.25 273.25 274.17 275.76 276.37 276.69 277.01 277.33 277.65 277.98 278.30
273.24 273.24 274.13 275.70 276.31 276.63 276.96 277.29 277.61 277.94 278.27
273.24 273.24 274.10 275.65 276.25 276.58 276.92 277.25 277.58 277.91 278.24
273.24 273.24 274.08 275.59 276.20 276.53 276.87 277.21 277.54 277.88 278.22
273.24 273.24 274.06 275.55 276.15 276.49 276.83 277.17 277.51 277.85 278.19
273.25 273.25 274.04 275.50 276.10 276.45 276.79 277.13 277.48 277.82 278.17
273.28 273.28 274.04 275.46 276.06 276.40 276.75 277.10 277.45 277.80 278.15
273.29 273.29 274.03 275.43 276.02 276.37 276.72 277.07 277.42 277.78 278.13
273.25 273.25 274.01 275.38 275.97 276.33 276.68 277.04 277.39 277.75 278.11
273.27 273.27 273.99 275.35 275.94 276.30 276.66 277.01 277.37 277.73 278.09
273.09 273.09 273.89 275.30 275.89 276.25 276.62 276.98 277.34 277.70 278.07
273.04 273.04 273.82 275.26 275.85 276.22 276.58 276.95 277.32 277.68 278.05
273.11 273.11 273.84 275.22 275.81 276.18 276.55 276.92 277.29 277.66 278.03
273.19 273.19 273.89 275.20 275.79 276.16 276.53 276.90 277.27 277.64 278.01
273.09 273.09 273.84 275.17 275.76 276.13 276.51 276.88 277.25 277.63 278.00
273.09 273.09 273.84 275.17 275.76 276.13 276.51 276.88 277.25 277.63 278.00
272.95 272.95 273.68 274.88 275.45 275.85 276.25 276.65 277.05 277.45 277.85
272.95 272.95 273.68 274.88 275.45 275.85 276.25 276.65 277.05 277.45 277.85
272.95 272.95 273.68 274.88 275.45 275.85 276.25 276.65 277.05 277.45 277.85
272.95 272.95 273.65 274.82 275.41 275.81 276.21 276.62 277.02 277.43 277.83
272.95 272.95 273.65 274.78 275.36 275.76 276.17 276.58 276.99 277.40 277.80
272.95 272.95 273.65 274.78 275.36 275.76 276.17 276.58 276.99 277.40 277.80
272.95 272.95 273.65 274.78 275.36 275.76 276.17 276.58 276.99 277.40 277.80
272.95 272.95 273.65 274.77 275.33 275.74 276.15 276.56 276.97 277.38 277.79
272.95 272.95 273.65 274.72 275.26 275.68 276.09 276.51 276.93 277.34 277.76
272.95 272.95 273.65 274.72 275.26 275.68 276.09 276.51 276.93 277.34 277.76
272.95 272.95 273.64 274.70 275.26 275.68 276.09 276.51 276.93 277.34 277.76
272.95 272.95 273.56 274.68 275.26 275.68 276.09 276.51 276.93 277.34 277.76
272.92 272.92 273.55 274.62 275.18 275.60 276.02 276.45 276.87 277.29 277.72
272.90 272.90 273.55 274.62 275.17 275.59 276.02 276.44 276.86 277.29 277.71
272.92 272.92 273.55 274.62 275.17 275.59 276.02 276.44 276.86 277.29 277.71
272.95 272.95 273.55 274.62 275.17 275.59 276.02 276.44 276.86 277.29 277.71
272.88 272.88 273.53 274.57 275.13 275.56 275.99 276.41 276.84 277.27 277.69
272.85 272.85 273.52 274.52 275.07 275.51 275.94 276.37 276.80 277.23 277.67
272.85 272.85 273.52 274.52 275.07 275.51 275.94 276.37 276.80 277.23 277.67
272.86 272.86 273.52 274.52 275.07 275.51 275.94 276.37 276.80 277.23 277.67
272.85 272.85 273.53 274.52 275.07 275.51 275.94 276.37 276.80 277.23 277.67
272.85 272.85 273.58 274.51 275.07 275.50 275.93 276.37 276.80 277.23 277.66
272.88 272.88 273.58 274.48 275.02 275.46 275.89 276.33 276.77 277.20 277.64
272.95 272.95 273.58 274.52 275.07 275.51 275.94 276.37 276.80 277.23 277.67
272.95 272.95 273.58 274.52 275.07 275.51 275.94 276.37 276.80 277.23 277.67
272.95 272.95 273.58 274.49 275.04 275.48 275.91 276.35 276.78 277.22 277.65
272.95 272.95 273.58 274.45 274.98 275.42 275.86 276.30 276.74 277.18 277.62
272.95 272.95 273.57 274.45 274.98 275.42 275.86 276.30 276.74 277.18 277.62
272.95 272.95 273.52 274.45 274.98 275.42 275.86 276.30 276.74 277.18 277.62
272.95 272.95 273.52 274.45 274.98 275.42 275.86 276.30 276.74 277.18 277.62
272.90 272.90 273.49 274.42 274.98 275.42 275.86 276.30 276.74 277.18 277.62
272.95 272.95 273.49 274.42 274.98 275.42 275.86 276.30 276.74 277.18 277.62
272.91 272.91 273.48 274.38 274.93 275.38 275.82 276.26 276.71 277.15 277.60
272.85 272.85 273.48 274.35 274.89 275.33 275.78 276.23 276.68 277.13 277.57
272.85 272.85 273.48 274.35 274.89 275.33 275.78 276.23 276.68 277.13 277.57
272.85 272.85 273.48 274.35 274.89 275.33 275.78 276.23 276.68 277.13 277.57
272.85 272.85 273.48 274.35 274.88 275.33 275.78 276.23 276.68 277.12 277.57
272.85 272.85 273.48 274.32 274.84 275.29 275.74 276.19 276.65 277.10 277.55
272.85 272.85 273.48 274.28 274.79 275.25 275.70 276.16 276.62 277.07 277.53
272.85 272.85 273.48 274.28 274.79 275.25 275.70 276.16 276.62 277.07 277.53
272.85 272.85 273.48 274.28 274.79 275.25 275.70 276.16 276.62 277.07 277.53
272.86 272.86 273.48 274.28 274.79 275.25 275.70 276.16 276.62 277.07 277.53
272.95 272.95 273.48 274.28 274.79 275.25 275.70 276.16 276.62 277.07 277.53
272.95 272.95 273.48 274.28 274.79 275.25 275.70 276.16 276.62 277.07 277.53
272.95 272.95 273.48 274.28 274.79 275.25 275.70 276.16 276.62 277.07 277.53
272.95 272.95 273.48 274.28 274.79 275.25 275.70 276.16 276.62 277.07 277.53
272.93 272.93 273.45 274.25 274.79 275.25 275.70 276.16 276.62 277.07 277.53
272.85 272.85 273.45 274.19 274.71 275.17 275.64 276.10 276.56 277.03 277.49
272.85 272.85 273.45 274.18 274.70 275.16 275.63 276.09 276.55 277.02 277.48
272.94 272.94 273.45 274.23 274.77 275.23 275.68 276.14 276.60 277.06 277.52
272.95 272.95 273.45 274.23 274.77 275.23 275.68 276.14 276.60 277.06 277.52
272.95 272.95 273.45 274.20 274.72 275.18 275.64 276.11 276.57 277.03 277.49
272.95 272.95 273.45 274.18 274.70 275.16 275.63 276.09 276.55 277.02 277.48
272.95 272.95 273.45 274.18 274.70 275.16 275.63 276.09 276.55 277.02 277.48
272.95 272.95 273.45 274.18 274.70 275.16 275.63 276.09 276.55 277.02 277.48
272.94 272.94 273.45 274.18 274.70 275.16 275.63 276.09 276.55 277.02 277.48
272.85 272.85 273.45 274.18 274.69 275.16 275.62 276.09 276.55 277.02 277.48
272.85 272.85 273.44 274.14 274.64 275.11 275.58 276.05 276.52 276.99 277.46
272.85 272.85 273.43 274.10 274.61 275.08 275.55 276.02 276.49 276.97 277.44
272.95 272.95 273.38 274.24 274.81 275.27 275.72 276.18 276.63 277.08 277.54
272.95 272.95 273.38 274.23 274.80 275.25 275.71 276.16 276.62 277.08 277.53
272.95 272.95 273.37 274.21 274.78 275.23 275.69 276.15 276.61 277.06 277.52
272.95 272.95 273.37 274.19 274.76 275.21 275.67 276.13 276.59 277.05 277.51
272.95 272.95 273.37 274.18 274.73 275.19 275.65 276.12 276.58 277.04 277.50
272.95 272.95 273.37 274.16 274.71 275.17 275.64 276.10 276.56 277.03 277.49
272.96 272.96 273.37 274.14 274.69 275.16 275.62 276.09 276.55 277.01 277.48
272.97 272.97 273.37 274.13 274.67 275.14 275.61 276.07 276.54 277.00 277.47
272.96 272.96 273.36 274.11 274.65 275.12 275.59 276.05 276.52 276.99 277.46
272.97 272.97 273.37 274.10 274.64 275.11 275.57 276.04 276.51 276.98 277.45
272.97 272.97 273.37 274.09 274.62 275.09 275.56 276.03 276.50 276.97 277.44
272.97 272.97 273.36 274.08 274.61 275.08 275.56 276.03 276.50 276.97 277.44
272.97 272.97 273.36 274.08 274.61 275.08 275.55 276.02 276.50 276.97 277.44
272.97 272.97 273.36 274.18 274.75 275.21 275.67 276.13 276.59 277.05 277.51
272.97 272.97 273.36 274.18 274.75 275.21 275.67 276.13 276.59 277.05 277.51
272.98 272.98 273.36 274.18 274.75 275.21 275.67 276.13 276.59 277.05 277.51
272.95 272.95 273.36 274.17 274.74 275.20 275.66 276.12 276.58 277.04 277.50
272.95 272.95 273.36 274.16 274.73 275.19 275.65 276.12 276.58 277.04 277.50
272.95 272.95 273.36 274.15 274.72 275.18 275.65 276.11 276.57 277.03 277.49
272.95 272.95 273.35 274.14 274.71 275.17 275.64 276.10 276.56 277.03 277.49
272.95 272.95 273.35 274.13 274.70 275.17 275.63 276.09 276.56 277.02 277.48
272.95 272.95 273.35 274.12 274.69 275.16 275.62 276.09 276.55 277.01 277.48
272.95 272.95 273.34 274.11 274.68 275.15 275.61 276.08 276.54 277.01 277.47
272.95 272.95 273.34 274.10 274.67 275.14 275.60 276.07 276.54 277.00 277.47
272.95 272.95 273.34 274.09 274.66 275.13 275.60 276.06 276.53 277.00 277.46
272.95 272.95 273.33 274.08 274.65 275.12 275.59 276.06 276.52 276.99 277.46
272.95 272.95 273.33 274.07 274.64 275.11 275.58 276.05 276.52 276.99 277.45
272.95 272.95 273.33 274.06 274.63 275.10 275.57 276.04 276.51 276.98 277.45
272.95 272.95 273.33 274.05 274.62 275.09 275.56 276.03 276.50 276.97 277.44
272.95 272.95 273.32 274.04 274.61 275.08 275.55 276.03 276.50 276.97 277.44
272.95 272.95 273.32 274.03 274.60 275.07 275.55 276.02 276.49 276.96 277.43
272.95 272.95 273.32 274.02 274.59 275.06 275.54 276.01 276.48 276.96 277.43
272.95 272.95 273.31 274.01 274.58 275.05 275.53 276.00 276.48 276.95 277.42
272.95 272.95 273.31 274.00 274.57 275.05 275.52 276.00 276.47 276.94 277.42
272.95 272.95 273.31 273.99 274.56 275.04 275.51 275.99 276.46 276.94 277.41
272.95 272.95 273.31 273.98 274.55 275.03 275.50 275.98 276.46 276.93 277.41
272.95 272.95 273.30 273.97 274.54 275.02 275.50 275.97 276.45 276.93 277.40
272.92 272.92 273.23 273.97 274.53 275.01 275.49 275.97 276.44 276.92 277.40
272.92 272.92 273.22 273.96 274.52 275.00 275.48 275.96 276.44 276.91 277.39
272.92 272.92 273.22 273.95 274.51 274.99 275.47 275.95 276.43 276.91 277.39
272.92 272.92 273.22 273.94 274.50 274.98 275.46 275.94 276.42 276.90 277.38
272.92 272.92 273.21 273.93 274.49 274.97 275.45 275.94 276.42 276.90 277.38
272.93 272.93 273.22 273.93 274.50 274.98 275.46 275.94 276.42 276.90 277.38
272.93 272.93 273.22 273.94 274.50 274.98 275.46 275.94 276.42 276.90 277.38
273.00 273.00 273.24 273.93 274.49 274.97 275.45 275.93 276.42 276.90 277.38
273.66 273.66 273.56 273.94 274.49 274.97 275.45 275.93 276.41 276.90 277.38
274.98 274.98 274.04 274.01 274.52 275.00 275.48 275.96 276.44 276.92 277.40
276.60 276.60 274.89 274.20 274.61 275.09 275.56 276.03 276.50 276.97 277.44
277.25 277.25 275.78 274.54 274.81 275.26 275.71 276.17 276.62 277.08 277.53
277.15 277.15 275.86 274.86 275.07 275.50 275.94 276.37 276.80 277.23 277.67
277.00 277.00 276.24 275.14 275.30 275.72 276.13 276.54 276.95 277.37 277.78
278.87 278.87 276.67 275.36 275.52 275.91 276.30 276.70 277.09 277.49 277.88
280.45 280.45 277.84 275.71 275.73 276.11 276.48 276.86 277.24 277.61 277.99
281.13 281.13 278.59 276.16 276.07 276.42 276.76 277.11 277.46 277.81 278.15
281.87 281.87 279.32 276.65 276.46 276.77 277.09 277.40 277.71 278.03 278.34
282.88 282.88 280.09 277.15 276.86 277.14 277.42 277.70 277.98 278.26 278.54
283.76 283.76 280.96 277.68 277.29 277.54 277.78 278.02 278.27 278.51 278.75
283.65 283.65 281.27 278.19 277.74 277.95 278.15 278.36 278.56 278.77 278.97
283.06 283.06 281.28 278.58 278.14 278.31 278.48 278.65 278.82 278.99 279.16
282.70 282.70 281.22 278.85 278.44 278.59 278.73 278.88 279.02 279.17 279.31
281.77 281.77 280.89 279.02 278.67 278.79 278.92 279.04 279.17 279.30 279.42
280.27 280.27 280.20 279.07 278.80 278.92 279.03 279.15 279.26 279.38 279.49
279.44 279.44 279.55 278.97 278.82 278.93 279.05 279.16 279.27 279.39 279.50
279.58 279.58 279.36 278.82 278.76 278.88 278.99 279.11 279.23 279.35 279.47
279.52 279.52 279.18 278.71 278.68 278.81 278.93 279.06 279.18 279.31 279.43
280.03 280.03 279.26 278.53 278.47 278.61 278.76 278.90 279.04 279.18 279.33
280.67 280.67 279.56 278.54 278.45 278.59 278.74 278.88 279.03 279.17 279.32
281.43 281.43 279.97 278.63 278.49 278.63 278.77 278.91 279.05 279.20 279.34
282.17 282.17 280.45 278.78 278.58 278.72 278.85 278.98 279.12 279.25 279.38
282.84 282.84 281.03 278.99 278.73 278.85 278.97 279.09 279.21 279.33 279.45
283.10 283.10 281.37 279.25 278.92 279.03 279.13 279.23 279.34 279.44 279.55
283.75 283.75 281.88 279.52 279.14 279.22 279.31 279.40 279.48 279.57 279.65
284.08 284.08 282.28 279.81 279.38 279.44 279.51 279.57 279.64 279.71 279.77
283.69 283.69 282.31 280.07 279.61 279.66 279.70 279.75 279.79 279.84 279.89
282.86 282.86 282.06 280.23 279.80 279.83 279.86 279.89 279.92 279.95 279.98
282.71 282.71 281.81 280.28 279.91 279.93 279.95 279.97 279.99 280.01 280.03
282.79 282.79 281.81 280.30 279.96 279.98 280.00 280.01 280.03 280.04 280.06
282.57 282.57 281.76 280.37 280.05 280.06 280.07 280.08 280.08 280.09 280.10
282.62 282.62 281.72 280.39 280.07 280.08 280.08 280.09 280.10 280.10 280.11
282.31 282.31 281.70 280.42 280.11 280.11 280.12 280.12 280.12 280.13 280.13
282.61 282.61 281.65 280.43 280.14 280.15 280.15 280.15 280.15 280.15 280.15
282.98 282.98 281.96 280.48 280.18 280.18 280.18 280.17 280.17 280.17 280.17
282.76 282.76 281.90 280.56 280.26 280.25 280.24 280.23 280.22 280.21 280.20
283.26 283.26 282.15 280.64 280.33 280.31 280.30 280.28 280.27 280.25 280.24
282.81 282.81 282.05 280.74 280.41 280.39 280.37 280.34 280.32 280.30 280.28
282.85 282.85 282.08 280.79 280.48 280.45 280.42 280.39 280.36 280.34 280.31
282.57 282.57 281.98 280.83 280.52 280.49 280.46 280.43 280.39 280.36 280.33
282.45 282.45 281.90 280.84 280.56 280.53 280.49 280.46 280.42 280.39 280.35
282.50 282.50 281.81 280.85 280.59 280.55 280.51 280.47 280.44 280.40 280.36
282.88 282.88 282.06 280.87 280.60 280.56 280.52 280.48 280.45 280.41 280.37
282.56 282.56 281.95 280.92 280.64 280.60 280.56 280.52 280.47 280.43 280.39
282.80 282.80 281.98 280.94 280.67 280.63 280.58 280.54 280.49 280.45 280.40
284.79 284.79 282.73 281.01 280.71 280.66 280.61 280.57 280.52 280.47 280.42
285.85 285.85 283.75 281.28 280.84 280.79 280.73 280.67 280.61 280.55 280.49
285.24 285.24 283.88 281.62 281.10 281.02 280.94 280.86 280.78 280.70 280.61
285.56 285.56 284.05 281.86 281.33 281.23 281.13 281.03 280.93 280.83 280.73
285.45 285.45 284.16 282.06 281.52 281.41 281.29 281.17 281.05 280.94 280.82
285.35 285.35 284.11 282.21 281.69 281.56 281.42 281.29 281.16 281.03 280.90
285.74 285.74 284.26 282.34 281.81 281.67 281.53 281.39 281.25 281.11 280.96
286.33 286.33 284.60 282.49 281.95 281.79 281.64 281.49 281.33 281.18 281.03
286.54 286.54 284.87 282.69 282.10 281.94 281.77 281.60 281.44 281.27 281.11
286.75 286.75 285.02 282.88 282.28 282.10 281.92 281.74 281.55 281.37 281.19
287.11 287.11 285.23 283.06 282.44 282.25 282.05 281.86 281.66 281.47 281.27
287.15 287.15 285.41 283.24 282.62 282.41 282.20 281.99 281.78 281.57 281.36
286.44 286.44 285.43 283.63 283.06 282.81 282.57 282.32 282.07 281.82 281.57
285.21 285.21 284.98 283.72 283.19 282.93 282.67 282.42 282.16 281.90 281.64
285.09 285.09 284.67 283.68 283.23 282.96 282.70 282.44 282.18 281.92 281.66
285.25 285.25 284.58 283.60 283.18 282.92 282.66 282.41 282.15 281.89 281.63
285.50 285.50 284.60 283.55 283.14 282.88 282.63 282.38 282.12 281.87 281.61
285.65 285.65 284.68 283.54 283.13 282.87 282.62 282.37 282.11 281.86 281.61
285.86 285.86 284.78 283.58 283.15 282.90 282.64 282.38 282.13 281.87 281.62
286.02 286.02 284.94 283.65 283.20 282.94 282.68 282.42 282.16 281.90 281.64
286.02 286.02 285.01 283.73 283.27 283.00 282.74 282.47 282.21 281.94 281.68
285.79 285.79 284.97 283.78 283.32 283.05 282.78 282.51 282.24 281.97 281.70
285.81 285.81 285.00 283.82 283.36 283.09 282.81 282.54 282.27 281.99 281.72
285.70 285.70 284.97 283.88 283.42 283.14 282.87 282.59 282.31 282.03 281.75
285.81 285.81 284.99 283.89 283.44 283.16 282.88 282.60 282.32 282.04 281.76
285.95 285.95 285.03 283.91 283.46 283.18 282.90 282.62 282.33 282.05 281.77
286.18 286.18 285.13 283.93 283.47 283.19 282.91 282.62 282.34 282.06 281.78
286.52 286.52 285.26 283.98 283.51 283.23 282.94 282.65 282.37 282.08 281.80
287.02 287.02 285.48 284.06 283.57 283.27 282.98 282.69 282.40 282.11 281.82
287.49 287.49 285.78 284.17 283.64 283.34 283.04 282.75 282.45 282.15 281.86
288.01 288.01 286.08 284.33 283.76 283.45 283.14 282.84 282.53 282.22 281.92
288.49 288.49 286.47 284.54 283.92 283.60 283.28 282.96 282.64 282.32 281.99
288.35 288.35 286.68 284.72 284.05 283.72 283.39 283.06 282.72 282.39 282.06
287.11 287.11 286.44 284.83 284.15 283.81 283.47 283.13 282.79 282.45 282.11
286.83 286.83 286.13 284.86 284.24 283.89 283.54 283.20 282.85 282.50 282.15
287.38 287.38 286.15 284.85 284.27 283.92 283.57 283.22 282.87 282.52 282.17
287.85 287.85 286.35 284.88 284.30 283.94 283.59 283.24 282.88 282.53 282.18
288.18 288.18 286.53 284.96 284.36 284.00 283.64 283.28 282.93 282.57 282.21
288.63 288.63 286.79 285.07 284.44 284.07 283.71 283.34 282.98 282.61 282.25
288.67 288.67 286.97 285.25 284.61 284.23 283.85 283.47 283.09 282.71 282.33
288.75 288.75 287.11 285.45 284.82 284.42 284.03 283.63 283.23 282.83 282.44
288.48 288.48 287.25 285.66 285.01 284.60 284.18 283.77 283.35 282.94 282.53
287.84 287.84 287.08 285.69 285.03 284.61 284.20 283.78 283.37 282.95 282.54
287.36 287.36 286.79 285.61 284.97 284.56 284.15 283.74 283.33 282.92 282.51
287.36 287.36 286.63 285.54 284.94 284.54 284.13 283.72 283.31 282.90 282.50
287.54 287.54 286.61 285.51 284.94 284.53 284.12 283.71 283.31 282.90 282.49
287.59 287.59 286.63 285.49 284.91 284.50 284.10 283.69 283.29 282.88 282.48
287.88 287.88 286.68 285.47 284.89 284.48 284.08 283.68 283.28 282.87 282.47
287.87 287.87 286.76 285.49 284.90 284.49 284.09 283.69 283.28 282.88 282.47
287.97 287.97 286.78 285.52 284.92 284.52 284.11 283.70 283.30 282.89 282.48
288.52 288.52 287.01 285.63 285.02 284.61 284.19 283.78 283.36 282.95 282.53
289.10 289.10 287.30 285.71 285.05 284.63 284.22 283.80 283.38 282.97 282.55
289.52 289.52 287.57 285.81 285.12 284.69 284.27 283.85 283.43 283.00 282.58
289.30 289.30 287.73 285.94 285.21 284.78 284.35 283.92 283.49 283.06 282.63
288.53 288.53 287.54 286.03 285.32 284.88 284.44 284.00 283.56 283.12 282.68
288.60 288.60 287.44 286.06 285.38 284.94 284.49 284.05 283.60 283.16 282.71
289.01 289.01 287.54 286.08 285.42 284.97 284.52 284.07 283.62 283.17 282.73
289.34 289.34 287.68 286.13 285.45 285.00 284.55 284.10 283.65 283.20 282.75
289.43 289.43 287.81 286.20 285.51 285.05 284.60 284.14 283.68 283.23 282.77
289.24 289.24 287.85 286.27 285.57 285.11 284.65 284.19 283.72 283.26 282.80
288.66 288.66 287.67 286.31 285.62 285.15 284.69 284.22 283.76 283.29 282.83
287.93 287.93 287.41 286.29 285.64 285.18 284.71 284.24 283.77 283.31 282.84
287.36 287.36 287.05 286.22 285.62 285.16 284.69 284.22 283.76 283.29 282.83
287.44 287.44 286.87 286.11 285.55 285.09 284.63 284.17 283.71 283.25 282.79
287.74 287.74 286.86 286.06 285.54 285.08 284.62 284.16 283.70 283.25 282.79
288.24 288.24 287.07 286.05 285.50 285.05 284.59 284.14 283.68 283.22 282.77
288.09 288.09 287.12 286.05 285.49 285.03 284.58 284.12 283.67 283.22 282.76
288.53 288.53 287.24 286.13 285.54 285.08 284.63 284.17 283.71 283.25 282.79
288.49 288.49 287.42 286.22 285.60 285.14 284.67 284.21 283.74 283.28 282.82
287.77 287.77 287.25 286.23 285.62 285.15 284.69 284.22 283.76 283.29 282.83
287.48 287.48 287.05 286.20 285.61 285.15 284.68 284.22 283.75 283.29 282.82
287.03 287.03 286.80 286.13 285.58 285.12 284.66 284.20 283.73 283.27 282.81
287.09 287.09 286.64 286.03 285.52 285.06 284.60 284.15 283.69 283.23 282.78
286.92 286.92 286.51 285.94 285.44 284.99 284.54 284.09 283.64 283.19 282.74
286.88 286.88 286.38 285.84 285.36 284.91 284.47 284.03 283.58 283.14 282.70
287.04 287.04 286.37 285.75 285.28 284.84 284.41 283.97 283.53 283.10 282.66
287.49 287.49 286.45 285.70 285.21 284.78 284.35 283.92 283.49 283.06 282.63
287.75 287.75 286.63 285.72 285.21 284.78 284.35 283.92 283.49 283.06 282.63
287.80 287.80 286.82 285.82 285.27 284.84 284.40 283.96 283.53 283.09 282.66
287.39 287.39 286.72 285.85 285.29 284.86 284.42 283.98 283.54 283.10 282.67
287.21 287.21 286.64 285.84 285.30 284.86 284.43 283.99 283.55 283.11 282.67
286.80 286.80 286.46 285.81 285.29 284.85 284.42 283.98 283.54 283.10 282.67
287.12 287.12 286.40 285.75 285.25 284.82 284.38 283.95 283.51 283.08 282.65
287.31 287.31 286.49 285.72 285.22 284.79 284.36 283.93 283.49 283.06 282.63
287.38 287.38 286.53 285.73 285.21 284.78 284.35 283.92 283.49 283.06 282.63
287.25 287.25 286.53 285.74 285.22 284.79 284.36 283.93 283.49 283.06 282.63
287.43 287.43 286.54 285.74 285.22 284.79 284.36 283.93 283.49 283.06 282.63
288.17 288.17 286.74 285.75 285.23 284.79 284.36 283.93 283.50 283.07 282.63
288.24 288.24 286.97 285.82 285.26 284.83 284.39 283.96 283.52 283.09 282.65
287.47 287.47 286.89 285.90 285.32 284.88 284.44 284.00 283.56 283.12 282.68
287.01 287.01 286.65 285.91 285.36 284.91 284.47 284.03 283.58 283.14 282.70
286.92 286.92 286.54 285.87 285.35 284.91 284.47 284.02 283.58 283.14 282.70
286.70 286.70 286.44 285.85 285.35 284.91 284.46 284.02 283.58 283.14 282.69
286.73 286.73 286.37 285.81 285.32 284.88 284.44 284.00 283.56 283.12 282.68
286.63 286.63 286.32 285.76 285.28 284.84 284.41 283.97 283.53 283.10 282.66
286.60 286.60 286.24 285.72 285.24 284.81 284.37 283.94 283.51 283.07 282.64
286.68 286.68 286.20 285.67 285.20 284.77 284.34 283.91 283.48 283.05 282.62
286.57 286.57 286.19 285.64 285.17 284.75 284.32 283.89 283.46 283.04 282.61
286.26 286.26 286.05 285.61 285.15 284.72 284.30 283.87 283.45 283.02 282.60
286.32 286.32 285.98 285.56 285.11 284.69 284.27 283.85 283.42 283.00 282.58
286.36 286.36 285.97 285.51 285.07 284.65 284.23 283.81 283.39 282.97 282.56
286.14 286.14 285.91 285.48 285.04 284.62 284.21 283.79 283.37 282.96 282.54
285.98 285.98 285.79 285.43 285.01 284.59 284.18 283.77 283.35 282.94 282.53
285.82 285.82 285.70 285.38 284.96 284.55 284.15 283.74 283.33 282.92 282.51
285.84 285.84 285.62 285.32 284.92 284.51 284.11 283.70 283.30 282.89 282.48
285.60 285.60 285.53 285.28 284.88 284.47 284.07 283.67 283.27 282.87 282.46
286.20 286.20 285.62 285.23 284.84 284.44 284.04 283.64 283.24 282.84 282.44
285.67 285.67 285.62 285.23 284.81 284.41 284.02 283.62 283.22 282.83 282.43
285.48 285.48 285.42 285.20 284.80 284.41 284.01 283.61 283.22 282.82 282.43
284.73 284.73 285.13 285.13 284.76 284.37 283.98 283.58 283.19 282.80 282.41
284.32 284.32 284.77 285.00 284.68 284.29 283.91 283.52 283.14 282.75 282.37
284.81 284.81 284.72 284.84 284.56 284.18 283.81 283.43 283.06 282.68 282.31
285.25 285.25 284.96 284.78 284.47 284.10 283.73 283.36 283.00 282.63 282.26
284.98 284.98 284.99 284.78 284.44 284.07 283.71 283.34 282.98 282.61 282.25
283.89 283.89 284.49 284.74 284.42 284.06 283.70 283.33 282.97 282.60 282.24
282.85 282.85 283.92 284.59 284.34 283.98 283.63 283.27 282.91 282.56 282.20
282.56 282.56 283.43 284.34 284.18 283.84 283.50 283.15 282.81 282.47 282.12
281.91 281.91 282.98 284.08 283.98 283.66 283.33 283.01 282.68 282.35 282.03
283.21 283.21 283.21 283.85 283.78 283.47 283.16 282.85 282.54 282.23 281.92
282.45 282.45 283.12 283.76 283.64 283.34 283.05 282.75 282.45 282.16 281.86
282.10 282.10 282.79 283.63 283.54 283.25 282.96 282.67 282.38 282.10 281.81
283.51 283.51 283.12 283.49 283.40 283.13 282.85 282.57 282.30 282.02 281.74
282.71 282.71 283.16 283.49 283.34 283.07 282.80 282.53 282.25 281.98 281.71
281.39 281.39 282.53 283.41 283.31 283.04 282.77 282.50 282.23 281.97 281.70
282.14 282.14 282.49 283.23 283.18 282.92 282.67 282.41 282.15 281.89 281.63
281.30 281.30 282.19 283.10 283.05 282.81 282.56 282.31 282.07 281.82 281.57
281.57 281.57 282.11 282.95 282.93 282.69 282.46 282.22 281.98 281.75 281.51
281.38 281.38 281.98 282.82 282.81 282.58 282.36 282.13 281.90 281.68 281.45
282.03 282.03 282.20 282.73 282.70 282.48 282.27 282.05 281.83 281.62 281.40
281.28 281.28 281.92 282.67 282.63 282.42 282.21 282.00 281.79 281.58 281.37
279.87 279.87 281.30 282.54 282.55 282.35 282.14 281.94 281.73 281.53 281.33
279.82 279.82 280.88 282.29 282.39 282.20 282.01 281.82 281.63 281.44 281.25
280.27 280.27 280.93 282.08 282.20 282.02 281.85 281.67 281.50 281.33 281.15
278.94 278.94 280.40 281.92 282.05 281.88 281.72 281.56 281.40 281.24 281.08
279.14 279.14 280.21 281.70 281.88 281.73 281.58 281.44 281.29 281.14 280.99
278.28 278.28 279.78 281.49 281.70 281.57 281.44 281.30 281.17 281.04 280.91
277.82 277.82 279.28 281.23 281.50 281.38 281.27 281.15 281.04 280.92 280.81
278.23 278.23 279.21 280.97 281.27 281.17 281.08 280.98 280.89 280.79 280.70
278.79 278.79 279.40 280.80 281.08 281.00 280.92 280.84 280.77 280.69 280.61
279.15 279.15 279.58 280.73 280.97 280.90 280.83 280.76 280.69 280.62 280.55
279.15 279.15 279.68 280.70 280.90 280.84 280.77 280.71 280.65 280.58 280.52
279.10 279.10 279.66 280.67 280.86 280.80 280.74 280.68 280.62 280.56 280.50
278.31 278.31 279.38 280.62 280.81 280.75 280.70 280.64 280.59 280.53 280.47
277.85 277.85 278.98 280.48 280.72 280.67 280.63 280.58 280.53 280.48 280.43
277.66 277.66 278.81 280.32 280.59 280.55 280.52 280.48 280.44 280.40 280.37
278.15 278.15 278.78 280.16 280.45 280.43 280.40 280.37 280.35 280.32 280.30
278.17 278.17 278.84 280.06 280.34 280.32 280.30 280.29 280.27 280.26 280.24
278.33 278.33 278.87 280.00 280.26 280.25 280.24 280.23 280.22 280.21 280.20
278.46 278.46 278.96 279.96 280.20 280.20 280.19 280.19 280.18 280.18 280.17
278.71 278.71 279.04 279.94 280.16 280.16 280.16 280.16 280.16 280.16 280.16
278.95 278.95 279.22 279.94 280.14 280.14 280.14 280.14 280.14 280.14 280.14
278.66 278.66 279.15 279.96 280.14 280.14 280.14 280.14 280.14 280.14 280.14
279.21 279.21 279.31 279.95 280.13 280.13 280.13 280.13 280.14 280.14 280.14
278.71 278.71 279.27 279.98 280.13 280.13 280.13 280.13 280.14 280.14 280.14
279.53 279.53 279.42 279.97 280.12 280.12 280.13 280.13 280.13 280.13 280.14
279.78 279.78 279.72 280.02 280.13 280.13 280.13 280.14 280.14 280.14 280.14
279.84 279.84 279.84 280.10 280.18 280.18 280.18 280.17 280.17 280.17 280.17
279.77 279.77 279.87 280.16 280.23 280.22 280.22 280.21 280.20 280.20 280.19
279.65 279.65 279.85 280.20 280.27 280.26 280.25 280.24 280.23 280.22 280.21
279.40 279.40 279.74 280.21 280.29 280.28 280.26 280.25 280.24 280.23 280.22
279.30 279.30 279.66 280.19 280.28 280.27 280.26 280.25 280.24 280.23 280.22
278.58 278.58 279.43 280.16 280.27 280.26 280.25 280.24 280.23 280.22 280.21
277.69 277.69 278.93 280.05 280.21 280.21 280.20 280.20 280.19 280.19 280.18
277.77 277.77 278.61 279.87 280.10 280.10 280.11 280.11 280.12 280.12 280.12
277.96 277.96 278.63 279.71 279.96 279.97 279.99 280.01 280.02 280.04 280.06
277.72 277.72 278.50 279.60 279.85 279.87 279.90 279.93 279.95 279.98 280.00
277.50 277.50 278.32 279.49 279.75 279.79 279.82 279.85 279.89 279.92 279.96
277.14 277.14 278.17 279.38 279.65 279.69 279.73 279.78 279.82 279.86 279.90
276.24 276.24 277.68 279.24 279.55 279.60 279.65 279.70 279.75 279.80 279.85
276.07 276.07 277.33 279.03 279.40 279.46 279.53 279.59 279.65 279.72 279.78
276.41 276.41 277.27 278.83 279.22 279.30 279.38 279.46 279.54 279.62 279.70
276.64 276.64 277.34 278.68 279.07 279.16 279.25 279.35 279.44 279.53 279.62
276.12 276.12 277.18 278.58 278.96 279.06 279.16 279.26 279.36 279.46 279.57
275.07 275.07 276.62 278.44 278.86 278.97 279.08 279.19 279.30 279.41 279.52
274.75 274.75 276.21 278.22 278.70 278.82 278.95 279.07 279.19 279.32 279.44
274.77 274.77 276.05 278.00 278.51 278.65 278.79 278.93 279.07 279.21 279.35
274.98 274.98 276.01 277.82 278.33 278.49 278.64 278.80 278.95 279.11 279.26
275.38 275.38 276.12 277.69 278.19 278.36 278.53 278.69 278.86 279.03 279.19
275.81 275.81 276.32 277.62 278.09 278.26 278.44 278.61 278.79 278.96 279.14
274.90 274.90 276.04 277.57 278.03 278.21 278.39 278.57 278.75 278.93 279.11
274.45 274.45 275.72 277.46 277.95 278.14 278.33 278.51 278.70 278.89 279.07
274.02 274.02 275.38 277.29 277.83 278.03 278.22 278.42 278.62 278.82 279.01
274.47 274.47 275.31 277.11 277.68 277.89 278.10 278.31 278.52 278.73 278.94
274.71 274.71 275.49 277.01 277.55 277.77 277.99 278.21 278.44 278.66 278.88
275.16 275.16 275.64 276.97 277.48 277.71 277.93 278.16 278.39 278.62 278.84
274.38 274.38 275.49 276.95 277.44 277.67 277.90 278.13 278.36 278.59 278.82
274.10 274.10 275.17 276.86 277.39 277.62 277.86 278.09 278.33 278.56 278.80
273.95 273.95 275.06 276.75 277.29 277.54 277.78 278.02 278.27 278.51 278.75
273.60 273.60 274.81 276.63 277.20 277.45 277.70 277.95 278.20 278.45 278.71
273.52 273.52 274.66 276.49 277.09 277.35 277.61 277.87 278.13 278.39 278.65
273.54 273.54 274.59 276.38 276.98 277.25 277.52 277.79 278.06 278.33 278.60
273.50 273.50 274.53 276.28 276.88 277.16 277.44 277.72 277.99 278.27 278.55
273.47 273.47 274.47 276.20 276.80 277.09 277.37 277.66 277.94 278.23 278.51
273.40 273.40 274.40 276.12 276.72 277.02 277.31 277.60 277.89 278.18 278.47
273.38 273.38 274.35 276.04 276.64 276.94 277.24 277.54 277.84 278.13 278.43
273.37 273.37 274.32 275.97 276.57 276.88 277.18 277.49 277.79 278.10 278.40
273.35 273.35 274.28 275.90 276.50 276.81 277.12 277.43 277.74 278.06 278.37
273.29 273.29 274.22 275.83 276.43 276.75 277.07 277.38 277.70 278.02 278.33
273.25 273.25 274.17 275.76 276.37 276.69 277.01 277.33 277.65 277.98 278.30
273.24 273.24 274.13 275.70 276.31 276.63 276.96 277.29 277.61 277.94 278.27
273.24 273.24 274.10 275.65 276.25 276.58 276.92 277.25 277.58 277.91 278.24
273.24 273.24 274.08 275.59 276.20 276.53 276.87 277.21 277.54 277.88 278.22
273.24 273.24 274.06 275.55 276.15 276.49 276.83 277.17 277.51 277.85 278.19
273.25 273.25 274.04 275.50 276.10 276.45 276.79 277.13 277.48 277.82 278.17
273.28 273.28 274.04 275.46 276.06 276.40 276.75 277.10 277.45 277.80 278.15
273.29 273.29 274.03 275.43 276.02 276.37 276.72 277.07 277.42 277.78 278.13
273.25 273.25 274.01 275.38 275.97 276.33 276.68 277.04 277.39 277.75 278.11
273.27 273.27 273.99 275.35 275.94 276.30 276.66 277.01 277.37 277.73 278.09
273.09 273.09 273.89 275.30 275.89 276.25 276.62 276.98 277.34 277.70 278.07
273.04 273.04 273.82 275.26 275.85 276.22 276.58 276.95 277.32 277.68 278.05
273.11 273.11 273.84 275.22 275.81 276.18 276.55 276.92 277.29 277.66 278.03
273.19 273.19 273.89 275.20 275.79 276.16 276.53 276.90 277.27 277.64 278.01
273.09 273.09 273.84 275.17 275.76 276.13 276.51 276.88 277.25 277.63 278.00
273.09 273.09 273.84 275.17 275.76 276.13 276.51 276.88 277.25 277.63 278.00
272.95 272.95 273.68 274.88 275.45 275.85 276.25 276.65 277.05 277.45 277.85
272.95 272.95 273.68 274.88 275.45 275.85 276.25 276.65 277.05 277.45 277.85
272.95 272.95 273.68 274.88 275.45 275.85 276.25 276.65 277.05 277.45 277.85
272.95 272.95 273.65 274.82 275.41 275.81 276.21 276.62 277.02 277.43 277.83
272.95 272.95 273.65 274.78 275.36 275.76 276.17 276.58 276.99 277.40 277.80
272.95 272.95 273.65 274.78 275.36 275.76 276.17 276.58 276.99 277.40 277.80
272.95 272.95 273.65 274.78 275.36 275.76 276.17 276.58 276.99 277.40 277.80
272.95 272.95 273.65 274.77 275.33 275.74 276.15 276.56 276.97 277.38 277.79
272.95 272.95 273.65 274.72 275.26 275.68 276.09 276.51 276.93 277.34 277.76
272.95 272.95 273.65 274.72 275.26 275.68 276.09 276.51 276.93 277.34 277.76
272.95 272.95 273.64 274.70 275.26 275.68 276.09 276.51 276.93 277.34 277.76
272.95 272.95 273.56 274.68 275.26 275.68 276.09 276.51 276.93 277.34 277.76
272.92 272.92 273.55 274.62 275.18 275.60 276.02 276.45 276.87 277.29 277.72
272.90 272.90 273.55 274.62 275.17 275.59 276.02 276.44 276.86 277.29 277.71
272.92 272.92 273.55 274.62 275.17 275.59 276.02 276.44 276.86 277.29 277.71
272.95 272.95 273.55 274.62 275.17 275.59 276.02 276.44 276.86 277.29 277.71
272.88 272.88 273.53 274.57 275.13 275.56 275.99 276.41 276.84 277.27 277.69
272.85 272.85 273.52 274.52 275.07 275.51 275.94 276.37 276.80 277.23 277.67
272.85 272.85 273.52 274.52 275.07 275.51 275.94 276.37 276.80 277.23 277.67
272.86 272.86 273.52 274.52 275.07 275.51 275.94 276.37 276.80 277.23 277.67
272.85 272.85 273.53 274.52 275.07 275.51 275.94 276.37 276.80 277.23 277.67
272.85 272.85 273.58 274.51 275.07 275.50 275.93 276.37 276.80 277.23 277.66
272.88 272.88 273.58 274.48 275.02 275.46 275.89 276.33 276.77 277.20 277.64
272.95 272.95 273.58 274.52 275.07 275.51 275.94 276.37 276.80 277.23 277.67
272.95 272.95 273.58 274.52 275.07 275.51 275.94 276.37 276.80 277.23 277.67
272.95 272.95 273.58 274.49 275.04 275.48 275.91 276.35 276.78 277.22 277.65
272.95 272.95 273.58 274.45 274.98 275.42 275.86 276.30 276.74 277.18 277.62
272.95 272.95 273.57 274.45 274.98 275.42 275.86 276.30 276.74 277.18 277.62
272.95 272.95 273.52 274.45 274.98 275.42 275.86 276.30 276.74 277.18 277.62
272.95 272.95 273.52 274.45 274.98 275.42 275.86 276.30 276.74 277.18 277.62
272.90 272.90 273.49 274.42 274.98 275.42 275.86 276.30 276.74 277.18 277.62
272.95 272.95 273.49 274.42 274.98 275.42 275.86 276.30 276.74 277.18 277.62
272.91 272.91 273.48 274.38 274.93 275.38 275.82 276.26 276.71 277.15 277.60
272.85 272.85 273.48 274.35 274.89 275.33 275.78 276.23 276.68 277.13 277.57
272.85 272.85 273.48 274.35 274.89 275.33 275.78 276.23 276.68 277.13 277.57
272.85 272.85 273.48 274.35 274.89 275.33 275.78 276.23 276.68 277.13 277.57
272.85 272.85 273.48 274.35 274.88 275.33 275.78 276.23 276.68 277.12 277.57
272.85 272.85 273.48 274.32 274.84 275.29 275.74 276.19 276.65 277.10 277.55
272.85 272.85 273.48 274.28 274.79 275.25 275.70 276.16 276.62 277.07 277.53
272.85 272.85 273.48 274.28 274.79 275.25 275.70 276.16 276.62 277.07 277.53
272.85 272.85 273.48 274.28 274.79 275.25 275.70 276.16 276.62 277.07 277.53
272.86 272.86 273.48 274.28 274.79 275.25 275.70 276.16 276.62 277.07 277.53
272.95 272.95 273.48 274.28 274.79 275.25 275.70 276.16 276.62 277.07 277.53
272.95 272.95 273.48 274.28 274.79 275.25 275.70 276.16 276.62 277.07 277.53
272.95 272.95 273.48 274.28 274.79 275.25 275.70 276.16 276.62 277.07 277.53
272.95 272.95 273.48 274.28 274.79 275.25 275.70 276.16 276.62 277.07 277.53
272.93 272.93 273.45 274.25 274.79 275.25 275.70 276.16 276.62 277.07 277.53
272.85 272.85 273.45 274.19 274.71 275.17 275.64 276.10 276.56 277.03 277.49
272.85 272.85 273.45 274.18 274.70 275.16 275.63 276.09 276.55 277.02 277.48
272.94 272.94 273.45 274.23 274.77 275.23 275.68 276.14 276.60 277.06 277.52
272.95 272.95 273.45 274.23 274.77 275.23 275.68 276.14 276.60 277.06 277.52
272.95 272.95 273.45 274.20 274.72 275.18 275.64 276.11 276.57 277.03 277.49
272.95 272.95 273.45 274.18 274.70 275.16 275.63 276.09 276.55 277.02 277.48
272.95 272.95 273.45 274.18 274.70 275.16 275.63 276.09 276.55 277.02 277.48
272.95 272.95 273.45 274.18 274.70 275.16 275.63 276.09 276.55 277.02 277.48
272.94 272.94 273.45 274.18 274.70 275.16 275.63 276.09 276.55 277.02 277.48
272.85 272.85 273.45 274.18 274.69 275.16 275.62 276.09 276.55 277.02 277.48
272.85 272.85 273.44 274.14 274.64 275.11 275.58 276.05 276.52 276.99 277.46
272.85 272.85 273.43 274.10 274.61 275.08 275.55 276.02 276.49 276.97 277.44
272.95 272.95 273.38 274.24 274.81 275.27 275.72 276.18 276.63 277.08 277.54
272.95 272.95 273.38 274.23 274.80 275.25 275.71 276.16 276.62 277.08 277.53
272.95 272.95 273.37 274.21 274.78 275.23 275.69 276.15 276.61 277.06 277.52
272.95 272.95 273.37 274.19 274.76 275.21 275.67 276.13 276.59 277.05 277.51
272.95 272.95 273.37 274.18 274.73 275.19 275.65 276.12 276.58 277.04 277.50
272.95 272.95 273.37 274.16 274.71 275.17 275.64 276.10 276.56 277.03 277.49
272.96 272.96 273.37 274.14 274.69 275.16 275.62 276.09 276.55 277.01 277.48
272.97 272.97 273.37 274.13 274.67 275.14 275.61 276.07 276.54 277.00 277.47
272.96 272.96 273.36 274.11 274.65 275.12 275.59 276.05 276.52 276.99 277.46
272.97 272.97 273.37 274.10 274.64 275.11 275.57 276.04 276.51 276.98 277.45
272.97 272.97 273.37 274.09 274.62 275.09 275.56 276.03 276.50 276.97 277.44
272.97 272.97 273.36 274.08 274.61 275.08 275.56 276.03 276.50 276.97 277.44
272.97 272.97 273.36 274.08 274.61 275.08 275.55 276.02 276.50 276.97 277.44
272.97 272.97 273.36 274.18 274.75 275.21 275.67 276.13 276.59 277.05 277.51
272.97 272.97 273.36 274.18 274.75 275.21 275.67 276.13 276.59 277.05 277.51
272.98 272.98 273.36 274.18 274.75 275.21 275.67 276.13 276.59 277.05 277.51
272.95 272.95 273.36 274.17 274.74 275.20 275.66 276.12 276.58 277.04 277.50
272.95 272.95 273.36 274.16 274.73 275.19 275.65 276.12 276.58 277.04 277.50
272.95 272.95 273.36 274.15 274.72 275.18 275.65 276.11 276.57 277.03 277.49
272.95 272.95 273.35 274.14 274.71 275.17 275.64 276.10 276.56 277.03 277.49
272.95 272.95 273.35 274.13 274.70 275.17 275.63 276.09 276.56 277.02 277.48
272.95 272.95 273.35 274.12 274.69 275.16 275.62 276.09 276.55 277.01 277.48
272.95 272.95 273.34 274.11 274.68 275.15 275.61 276.08 276.54 277.01 277.47
272.95 272.95 273.34 274.10 274.67 275.14 275.60 276.07 276.54 277.00 277.47
272.95 272.95 273.34 274.09 274.66 275.13 275.60 276.06 276.53 277.00 277.46
272.95 272.95 273.33 274.08 274.65 275.12 275.59 276.06 276.52 276.99 277.46
272.95 272.95 273.33 274.07 274.64 275.11 275.58 276.05 276.52 276.99 277.45
272.95 272.95 273.33 274.06 274.63 275.10 275.57 276.04 276.51 276.98 277.45
272.95 272.95 273.33 274.05 274.62 275.09 275.56 276.03 276.50 276.97 277.44
272.95 272.95 273.32 274.04 274.61 275.08 275.55 276.03 276.50 276.97 277.44
272.95 272.95 273.32 274.03 274.60 275.07 275.55 276.02 276.49 276.96 277.43
272.95 272.95 273.32 274.02 274.59 275.06 275.54 276.01 276.48 276.96 277.43
272.95 272.95 273.31 274.01 274.58 275.05 275.53 276.00 276.48 276.95 277.42
272.95 272.95 273.31 274.00 274.57 275.05 275.52 276.00 276.47 276.94 277.42
272.95 272.95 273.31 273.99 274.56 275.04 275.51 275.99 276.46 276.94 277.41
272.95 272.95 273.31 273.98 274.55 275.03 275.50 275.98 276.46 276.93 277.41
272.95 272.95 273.30 273.97 274.54 275.02 275.50 275.97 276.45 276.93 277.40
272.92 272.92 273.23 273.97 274.53 275.01 275.49 275.97 276.44 276.92 277.40
272.92 272.92 273.22 273.96 274.52 275.00 275.48 275.96 276.44 276.91 277.39
272.92 272.92 273.22 273.95 274.51 274.99 275.47 275.95 276.43 276.91 277.39
272.92 272.92 273.22 273.94 274.50 274.98 275.46 275.94 276.42 276.90 277.38
272.92 272.92 273.21 273.93 274.49 274.97 275.45 275.94 276.42 276.90 277.38
272.93 272.93 273.22 273.93 274.50 274.98 275.46 275.94 276.42 276.90 277.38
272.93 272.93 273.22 273.94 274.50 274.98 275.46 275.94 276.42 276.90 277.38
273.00 273.00 273.24 273.93 274.49 274.97 275.45 275.93 276.42 276.90 277.38
273.66 273.66 273.56 273.94 274.49 274.97 275.45 275.93 276.41 276.90 277.38
274.98 274.98 274.04 274.01 274.52 275.00 275.48 275.96 276.44 276.92 277.40
276.60 276.60 274.89 274.20 274.61 275.09 275.56 276.03 276.50 276.97 277.44
277.25 277.25 275.78 274.54 274.81 275.26 275.71 276.17 276.62 277.08 277.53
277.15 277.15 275.86 274.86 275.07 275.50 275.94 276.37 276.80 277.23 277.67
277.00 277.00 276.24 275.14 275.30 275.72 276.13 276.54 276.95 277.37 277.78
278.87 278.87 276.67 275.36 275.52 275.91 276.30 276.70 277.09 277.49 277.88
280.45 280.45 277.84 275.71 275.73 276.11 276.48 276.86 277.24 277.61 277.99
281.13 281.13 278.59 276.16 276.07 276.42 276.76 277.11 277.46 277.81 278.15
281.87 281.87 279.32 276.65 276.46 276.77 277.09 277.40 277.71 278.03 278.34
282.88 282.88 280.09 277.15 276.86 277.14 277.42 277.70 277.98 278.26 278.54
283.76 283.76 280.96 277.68 277.29 277.54 277.78 278.02 278.27 278.51 278.75
283.65 283.65 281.27 278.19 277.74 277.95 278.15 278.36 278.56 278.77 278.97
283.06 283.06 281.28 278.58 278.14 278.31 278.48 278.65 278.82 278.99 279.16
282.70 282.70 281.22 278.85 278.44 278.59 278.73 278.88 279.02 279.17 279.31
281.77 281.77 280.89 279.02 278.67 278.79 278.92 279.04 279.17 279.30 279.42
280.27 280.27 280.20 279.07 278.80 278.92 279.03 279.15 279.26 279.38 279.49
279.44 279.44 279.55 278.97 278.82 278.93 279.05 279.16 279.27 279.39 279.50
279.58 279.58 279.36 278.82 278.76 278.88 278.99 279.11 279.23 279.35 279.47
279.52 279.52 279.18 278.71 278.68 278.81 278.93 279.06 279.18 279.31 279.43
280.03 280.03 279.26 278.53 278.47 278.61 278.76 278.90 279.04 279.18 279.33
280.67 280.67 279.56 278.54 278.45 278.59 278.74 278.88 279.03 279.17 279.32
281.43 281.43 279.97 278.63 278.49 278.63 278.77 278.91 279.05 279.20 279.34
282.17 282.17 280.45 278.78 278.58 278.72 278.85 278.98 279.12 279.25 279.38
282.84 282.84 281.03 278.99 278.73 278.85 278.97 279.09 279.21 279.33 279.45
283.10 283.10 281.37 279.25 278.92 279.03 279.13 279.23 279.34 279.44 279.55
283.75 283.75 281.88 279.52 279.14 279.22 279.31 279.40 279.48 279.57 279.65
284.08 284.08 282.28 279.81 279.38 279.44 279.51 279.57 279.64 279.71 279.77
283.69 283.69 282.31 280.07 279.61 279.66 279.70 279.75 279.79 279.84 279.89
282.86 282.86 282.06 280.23 279.80 279.83 279.86 279.89 279.92 279.95 279.98
282.71 282.71 281.81 280.28 279.91 279.93 279.95 279.97 279.99 280.01 280.03
282.79 282.79 281.81 280.30 279.96 279.98 280.00 280.01 280.03 280.04 280.06
282.57 282.57 281.76 280.37 280.05 280.06 280.07 280.08 280.08 280.09 280.10
282.62 282.62 281.72 280.39 280.07 280.08 280.08 280.09 280.10 280.10 280.11
282.31 282.31 281.70 280.42 280.11 280.11 280.12 280.12 280.12 280.13 280.13
282.61 282.61 281.65 280.43 280.14 280.15 280.15 280.15 280.15 280.15 280.15
282.98 282.98 281.96 280.48 280.18 280.18 280.18 280.17 280.17 280.17 280.17
282.76 282.76 281.90 280.56 280.26 280.25 280.24 280.23 280.22 280.21 280.20
283.26 283.26 282.15 280.64 280.33 280.31 280.30 280.28 280.27 280.25 280.24
282.81 282.81 282.05 280.74 280.41 280.39 280.37 280.34 280.32 280.30 280.28
282.85 282.85 282.08 280.79 280.48 280.45 280.42 280.39 280.36 280.34 280.31
282.57 282.57 281.98 280.83 280.52 280.49 280.46 280.43 280.39 280.36 280.33
282.45 282.45 281.90 280.84 280.56 280.53 280.49 280.46 280.42 280.39 280.35
282.50 282.50 281.81 280.85 280.59 280.55 280.51 280.47 280.44 280.40 280.36
282.88 282.88 282.06 280.87 280.60 280.56 280.52 280.48 280.45 280.41 280.37
282.56 282.56 281.95 280.92 280.64 280.60 280.56 280.52 280.47 280.43 280.39
282.80 282.80 281.98 280.94 280.67 280.63 280.58 280.54 280.49 280.45 280.40
284.79 284.79 282.73 281.01 280.71 280.66 280.61 280.57 280.52 280.47 280.42
285.85 285.85 283.75 281.28 280.84 280.79 280.73 280.67 280.61 280.55 280.49
285.24 285.24 283.88 281.62 281.10 281.02 280.94 280.86 280.78 280.70 280.61
285.56 285.56 284.05 281.86 281.33 281.23 281.13 281.03 280.93 280.83 280.73
285.45 285.45 284.16 282.06 281.52 281.41 281.29 281.17 281.05 280.94 280.82
285.35 285.35 284.11 282.21 281.69 281.56 281.42 281.29 281.16 281.03 280.90
285.74 285.74 284.26 282.34 281.81 281.67 281.53 281.39 281.25 281.11 280.96
286.33 286.33 284.60 282.49 281.95 281.79 281.64 281.49 281.33 281.18 281.03
286.54 286.54 284.87 282.69 282.10 281.94 281.77 281.60 281.44 281.27 281.11
286.75 286.75 285.02 282.88 282.28 282.10 281.92 281.74 281.55 281.37 281.19
287.11 287.11 285.23 283.06 282.44 282.25 282.05 281.86 281.66 281.47 281.27
287.15 287.15 285.41 283.24 282.62 282.41 282.20 281.99 281.78 281.57 281.36
286.44 286.44 285.43 283.63 283.06 282.81 282.57 282.32 282.07 281.82 281.57
285.21 285.21 284.98 283.72 283.19 282.93 282.67 282.42 282.16 281.90 281.64
285.09 285.09 284.67 283.68 283.23 282.96 282.70 282.44 282.18 281.92 281.66
285.25 285.25 284.58 283.60 283.18 282.92 282.66 282.41 282.15 281.89 281.63
285.50 285.50 284.60 283.55 283.14 282.88 282.63 282.38 282.12 281.87 281.61
285.65 285.65 284.68 283.54 283.13 282.87 282.62 282.37 282.11 281.86 281.61
285.86 285.86 284.78 283.58 283.15 282.90 282.64 282.38 282.13 281.87 281.62
286.02 286.02 284.94 283.65 283.20 282.94 282.68 282.42 282.16 281.90 281.64
286.02 286.02 285.01 283.73 283.27 283.00 282.74 282.47 282.21 281.94 281.68
285.79 285.79 284.97 283.78 283.32 283.05 282.78 282.51 282.24 281.97 281.70
285.81 285.81 285.00 283.82 283.36 283.09 282.81 282.54 282.27 281.99 281.72
285.70 285.70 284.97 283.88 283.42 283.14 282.87 282.59 282.31 282.03 281.75
285.81 285.81 284.99 283.89 283.44 283.16 282.88 282.60 282.32 282.04 281.76
285.95 285.95 285.03 283.91 283.46 283.18 282.90 282.62 282.33 282.05 281.77
286.18 286.18 285.13 283.93 283.47 283.19 282.91 282.62 282.34 282.06 281.78
286.52 286.52 285.26 283.98 283.51 283.23 282.94 282.65 282.37 282.08 281.80
287.02 287.02 285.48 284.06 283.57 283.27 282.98 282.69 282.40 282.11 281.82
287.49 287.49 285.78 284.17 283.64 283.34 283.04 282.75 282.45 282.15 281.86
288.01 288.01 286.08 284.33 283.76 283.45 283.14 282.84 282.53 282.22 281.92
288.49 288.49 286.47 284.54 283.92 283.60 283.28 282.96 282.64 282.32 281.99
288.35 288.35 286.68 284.72 284.05 283.72 283.39 283.06 282.72 282.39 282.06
287.11 287.11 286.44 284.83 284.15 283.81 283.47 283.13 282.79 282.45 282.11
286.83 286.83 286.13 284.86 284.24 283.89 283.54 283.20 282.85 282.50 282.15
287.38 287.38 286.15 284.85 284.27 283.92 283.57 283.22 282.87 282.52 282.17
287.85 287.85 286.35 284.88 284.30 283.94 283.59 283.24 282.88 282.53 282.18
288.18 288.18 286.53 284.96 284.36 284.00 283.64 283.28 282.93 282.57 282.21
288.63 288.63 286.79 285.07 284.44 284.07 283.71 283.34 282.98 282.61 282.25
288.67 288.67 286.97 285.25 284.61 284.23 283.85 283.47 283.09 282.71 282.33
288.75 288.75 287.11 285.45 284.82 284.42 284.03 283.63 283.23 282.83 282.44
288.48 288.48 287.25 285.66 285.01 284.60 284.18 283.77 283.35 282.94 282.53
287.84 287.84 287.08 285.69 285.03 284.61 284.20 283.78 283.37 282.95 282.54
287.36 287.36 286.79 285.61 284.97 284.56 284.15 283.74 283.33 282.92 282.51
287.36 287.36 286.63 285.54 284.94 284.54 284.13 283.72 283.31 282.90 282.50
287.54 287.54 286.61 285.51 284.94 284.53 284.12 283.71 283.31 282.90 282.49
287.59 287.59 286.63 285.49 284.91 284.50 284.10 283.69 283.29 282.88 282.48
287.88 287.88 286.68 285.47 284.89 284.48 284.08 283.68 283.28 282.87 282.47
287.87 287.87 286.76 285.49 284.90 284.49 284.09 283.69 283.28 282.88 282.47
287.97 287.97 286.78 285.52 284.92 284.52 284.11 283.70 283.30 282.89 282.48
288.52 288.52 287.01 285.63 285.02 284.61 284.19 283.78 283.36 282.95 282.53
289.10 289.10 287.30 285.71 285.05 284.63 284.22 283.80 283.38 282.97 282.55
289.52 289.52 287.57 285.81 285.12 284.69 284.27 283.85 283.43 283.00 282.58
289.30 289.30 287.73 285.94 285.21 284.78 284.35 283.92 283.49 283.06 282.63
288.53 288.53 287.54 286.03 285.32 284.88 284.44 284.00 283.56 283.12 282.68
288.60 288.60 287.44 286.06 285.38 284.94 284.49 284.05 283.60 283.16 282.71
289.01 289.01 287.54 286.08 285.42 284.97 284.52 284.07 283.62 283.17 282.73
289.34 289.34 287.68 286.13 285.45 285.00 284.55 284.10 283.65 283.20 282.75
289.43 289.43 287.81 286.20 285.51 285.05 284.60 284.14 283.68 283.23 282.77
289.24 289.24 287.85 286.27 285.57 285.11 284.65 284.19 283.72 283.26 282.80
288.66 288.66 287.67 286.31 285.62 285.15 284.69 284.22 283.76 283.29 282.83
287.93 287.93 287.41 286.29 285.64 285.18 284.71 284.24 283.77 283.31 282.84
287.36 287.36 287.05 286.22 285.62 285.16 284.69 284.22 283.76 283.29 282.83
287.44 287.44 286.87 286.11 285.55 285.09 284.63 284.17 283.71 283.25 282.79
287.74 287.74 286.86 286.06 285.54 285.08 284.62 284.16 283.70 283.25 282.79
288.24 288.24 287.07 286.05 285.50 285.05 284.59 284.14 283.68 283.22 282.77
288.09 288.09 287.12 286.05 285.49 285.03 284.58 284.12 283.67 283.22 282.76
288.53 288.53 287.24 286.13 285.54 285.08 284.63 284.17 283.71 283.25 282.79
288.49 288.49 287.42 286.22 285.60 285.14 284.67 284.21 283.74 283.28 282.82
287.77 287.77 287.25 286.23 285.62 285.15 284.69 284.22 283.76 283.29 282.83
287.48 287.48 287.05 286.20 285.61 285.15 284.68 284.22 283.75 283.29 282.82
287.03 287.03 286.80 286.13 285.58 285.12 284.66 284.20 283.73 283.27 282.81
287.09 287.09 286.64 286.03 285.52 285.06 284.60 284.15 283.69 283.23 282.78
286.92 286.92 286.51 285.94 285.44 284.99 284.54 284.09 283.64 283.19 282.74
286.88 286.88 286.38 285.84 285.36 284.91 284.47 284.03 283.58 283.14 282.70
287.04 287.04 286.37 285.75 285.28 284.84 284.41 283.97 283.53 283.10 282.66
287.49 287.49 286.45 285.70 285.21 284.78 284.35 283.92 283.49 283.06 282.63
287.75 287.75 286.63 285.72 285.21 284.78 284.35 283.92 283.49 283.06 282.63
287.80 287.80 286.82 285.82 285.27 284.84 284.40 283.96 283.53 283.09 282.66
287.39 287.39 286.72 285.85 285.29 284.86 284.42 283.98 283.54 283.10 282.67
287.21 287.21 286.64 285.84 285.30 284.86 284.43 283.99 283.55 283.11 282.67
286.80 286.80 286.46 285.81 285.29 284.85 284.42 283.98 283.54 283.10 282.67
287.12 287.12 286.40 285.75 285.25 284.82 284.38 283.95 283.51 283.08 282.65
287.31 287.31 286.49 285.72 285.22 284.79 284.36 283.93 283.49 283.06 282.63
287.38 287.38 286.53 285.73 285.21 284.78 284.35 283.92 283.49 283.06 282.63
287.25 287.25 286.53 285.74 285.22 284.79 284.36 283.93 283.49 283.06 282.63
287.43 287.43 286.54 285.74 285.22 284.79 284.36 283.93 283.49 283.06 282.63
288.17 288.17 286.74 285.75 285.23 284.79 284.36 283.93 283.50 283.07 282.63
288.24 288.24 286.97 285.82 285.26 284.83 284.39 283.96 283.52 283.09 282.65
287.47 287.47 286.89 285.90 285.32 284.88 284.44 284.00 283.56 283.12 282.68
287.01 287.01 286.65 285.91 285.36 284.91 284.47 284.03 283.58 283.14 282.70
286.92 286.92 286.54 285.87 285.35 284.91 284.47 284.02 283.58 283.14 282.70
286.70 286.70 286.44 285.85 285.35 284.91 284.46 284.02 283.58 283.14 282.69
286.73 286.73 286.37 285.81 285.32 284.88 284.44 284.00 283.56 283.12 282.68
286.63 286.63 286.32 285.76 285.28 284.84 284.41 283.97 283.53 283.10 282.66
286.60 286.60 286.24 285.72 285.24 284.81 284.37 283.94 283.51 283.07 282.64
286.68 286.68 286.20 285.67 285.20 284.77 284.34 283.91 283.48 283.05 282.62
286.57 286.57 286.19 285.64 285.17 284.75 284.32 283.89 283.46 283.04 282.61
286.26 286.26 286.05 285.61 285.15 284.72 284.30 283.87 283.45 283.02 282.60
286.32 286.32 285.98 285.56 285.11 284.69 284.27 283.85 283.42 283.00 282.58
286.36 286.36 285.97 285.51 285.07 284.65 284.23 283.81 283.39 282.97 282.56
286.14 286.14 285.91 285.48 285.04 284.62 284.21 283.79 283.37 282.96 282.54
285.98 285.98 285.79 285.43 285.01 284.59 284.18 283.77 283.35 282.94 282.53
285.82 285.82 285.70 285.38 284.96 284.55 284.15 283.74 283.33 282.92 282.51
285.84 285.84 285.62 285.32 284.92 284.51 284.11 283.70 283.30 282.89 282.48
285.60 285.60 285.53 285.28 284.88 284.47 284.07 283.67 283.27 282.87 282.46
286.20 286.20 285.62 285.23 284.84 284.44 284.04 283.64 283.24 282.84 282.44
285.67 285.67 285.62 285.23 284.81 284.41 284.02 283.62 283.22 282.83 282.43
285.48 285.48 285.42 285.20 284.80 284.41 284.01 283.61 283.22 282.82 282.43
284.73 284.73 285.13 285.13 284.76 284.37 283.98 283.58 283.19 282.80 282.41
284.32 284.32 284.77 285.00 284.68 284.29 283.91 283.52 283.14 282.75 282.37
284.81 284.81 284.72 284.84 284.56 284.18 283.81 283.43 283.06 282.68 282.31
285.25 285.25 284.96 284.78 284.47 284.10 283.73 283.36 283.00 282.63 282.26
284.98 284.98 284.99 284.78 284.44 284.07 283.71 283.34 282.98 282.61 282.25
283.89 283.89 284.49 284.74 284.42 284.06 283.70 283.33 282.97 282.60 282.24
282.85 282.85 283.92 284.59 284.34 283.98 283.63 283.27 282.91 282.56 282.20
282.56 282.56 283.43 284.34 284.18 283.84 283.50 283.15 282.81 282.47 282.12
281.91 281.91 282.98 284.08 283.98 283.66 283.33 283.01 282.68 282.35 282.03
283.21 283.21 283.21 283.85 283.78 283.47 283.16 282.85 282.54 282.23 281.92
282.45 282.45 283.12 283.76 283.64 283.34 283.05 282.75 282.45 282.16 281.86
282.10 282.10 282.79 283.63 283.54 283.25 282.96 282.67 282.38 282.10 281.81
283.51 283.51 283.12 283.49 283.40 283.13 282.85 282.57 282.30 282.02 281.74
282.71 282.71 283.16 283.49 283.34 283.07 282.80 282.53 282.25 281.98 281.71
281.39 281.39 282.53 283.41 283.31 283.04 282.77 282.50 282.23 281.97 281.70
282.14 282.14 282.49 283.23 283.18 282.92 282.67 282.41 282.15 281.89 281.63
281.30 281.30 282.19 283.10 283.05 282.81 282.56 282.31 282.07 281.82 281.57
281.57 281.57 282.11 282.95 282.93 282.69 282.46 282.22 281.98 281.75 281.51
281.38 281.38 281.98 282.82 282.81 282.58 282.36 282.13 281.90 281.68 281.45
282.03 282.03 282.20 282.73 282.70 282.48 282.27 282.05 281.83 281.62 281.40
281.28 281.28 281.92 282.67 282.63 282.42 282.21 282.00 281.79 281.58 281.37
279.87 279.87 281.30 282.54 282.55 282.35 282.14 281.94 281.73 281.53 281.33
279.82 279.82 280.88 282.29 282.39 282.20 282.01 281.82 281.63 281.44 281.25
280.27 280.27 280.93 282.08 282.20 282.02 281.85 281.67 281.50 281.33 281.15
278.94 278.94 280.40 281.92 282.05 281.88 281.72 281.56 281.40 281.24 281.08
279.14 279.14 280.21 281.70 281.88 281.73 281.58 281.44 281.29 281.14 280.99
278.28 278.28 279.78 281.49 281.70 281.57 281.44 281.30 281.17 281.04 280.91
277.82 277.82 279.28 281.23 281.50 281.38 281.27 281.15 281.04 280.92 280.81
278.23 278.23 279.21 280.97 281.27 281.17 281.08 280.98 280.89 280.79 280.70
278.79 278.79 279.40 280.80 281.08 281.00 280.92 280.84 280.77 280.69 280.61
279.15 279.15 279.58 280.73 280.97 280.90 280.83 280.76 280.69 280.62 280.55
279.15 279.15 279.68 280.70 280.90 280.84 280.77 280.71 280.65 280.58 280.52
279.10 279.10 279.66 280.67 280.86 280.80 280.74 280.68 280.62 280.56 280.50
278.31 278.31 279.38 280.62 280.81 280.75 280.70 280.64 280.59 280.53 280.47
277.85 277.85 278.98 280.48 280.72 280.67 280.63 280.58 280.53 280.48 280.43
277.66 277.66 278.81 280.32 280.59 280.55 280.52 280.48 280.44 280.40 280.37
278.15 278.15 278.78 280.16 280.45 280.43 280.40 280.37 280.35 280.32 280.30
278.17 278.17 278.84 280.06 280.34 280.32 280.30 280.29 280.27 280.26 280.24
278.33 278.33 278.87 280.00 280.26 280.25 280.24 280.23 280.22 280.21 280.20
278.46 278.46 278.96 279.96 280.20 280.20 280.19 280.19 280.18 280.18 280.17
278.71 278.71 279.04 279.94 280.16 280.16 280.16 280.16 280.16 280.16 280.16
278.95 278.95 279.22 279.94 280.14 280.14 280.14 280.14 280.14 280.14 280.14
278.66 278.66 279.15 279.96 280.14 280.14 280.14 280.14 280.14 280.14 280.14
279.21 279.21 279.31 279.95 280.13 280.13 280.13 280.13 280.14 280.14 280.14
278.71 278.71 279.27 279.98 280.13 280.13 280.13 280.13 280.14 280.14 280.14
279.53 279.53 279.42 279.97 280.12 280.12 280.13 280.13 280.13 280.13 280.14
279.78 279.78 279.72 280.02 280.13 280.13 280.13 280.14 280.14 280.14 280.14
279.84 279.84 279.84 280.10 280.18 280.18 280.18 280.17 280.17 280.17 280.17
279.77 279.77 279.87 280.16 280.23 280.22 280.22 280.21 280.20 280.20 280.19
279.65 279.65 279.85 280.20 280.27 280.26 280.25 280.24 280.23 280.22 280.21
279.40 279.40 279.74 280.21 280.29 280.28 280.26 280.25 280.24 280.23 280.22
279.30 279.30 279.66 280.19 280.28 280.27 280.26 280.25 280.24 280.23 280.22
278.58 278.58 279.43 280.16 280.27 280.26 280.25 280.24 280.23 280.22 280.21
277.69 277.69 278.93 280.05 280.21 280.21 280.20 280.20 280.19 280.19 280.18
277.77 277.77 278.61 279.87 280.10 280.10 280.11 280.11 280.12 280.12 280.12
277.96 277.96 278.63 279.71 279.96 279.97 279.99 280.01 280.02 280.04 280.06
277.72 277.72 278.50 279.60 279.85 279.87 279.90 279.93 279.95 279.98 280.00
277.50 277.50 278.32 279.49 279.75 279.79 279.82 279.85 279.89 279.92 279.96
277.14 277.14 278.17 279.38 279.65 279.69 279.73 279.78 279.82 279.86 279.90
276.24 276.24 277.68 279.24 279.55 279.60 279.65 279.70 279.75 279.80 279.85
276.07 276.07 277.33 279.03 279.40 279.46 279.53 279.59 279.65 279.72 279.78
276.41 276.41 277.27 278.83 279.22 279.30 279.38 279.46 279.54 279.62 279.70
276.64 276.64 277.34 278.68 279.07 279.16 279.25 279.35 279.44 279.53 279.62
276.12 276.12 277.18 278.58 278.96 279.06 279.16 279.26 279.36 279.46 279.57
275.07 275.07 276.62 278.44 278.86 278.97 279.08 279.19 279.30 279.41 279.52
274.75 274.75 276.21 278.22 278.70 278.82 278.95 279.07 279.19 279.32 279.44
274.77 274.77 276.05 278.00 278.51 278.65 278.79 278.93 279.07 279.21 279.35
274.98 274.98 276.01 277.82 278.33 278.49 278.64 278.80 278.95 279.11 279.26
275.38 275.38 276.12 277.69 278.19 278.36 278.53 278.69 278.86 279.03 279.19
275.81 275.81 276.32 277.62 278.09 278.26 278.44 278.61 278.79 278.96 279.14
274.90 274.90 276.04 277.57 278.03 278.21 278.39 278.57 278.75 278.93 279.11
274.45 274.45 275.72 277.46 277.95 278.14 278.33 278.51 278.70 278.89 279.07
274.02 274.02 275.38 277.29 277.83 278.03 278.22 278.42 278.62 278.82 279.01
274.47 274.47 275.31 277.11 277.68 277.89 278.10 278.31 278.52 278.73 278.94
274.71 274.71 275.49 277.01 277.55 277.77 277.99 278.21 278.44 278.66 278.88
275.16 275.16 275.64 276.97 277.48 277.71 277.93 278.16 278.39 278.62 278.84
274.38 274.38 275.49 276.95 277.44 277.67 277.90 278.13 278.36 278.59 278.82
274.10 274.10 275.17 276.86 277.39 277.62 277.86 278.09 278.33 278.56 278.80
273.95 273.95 275.06 276.75 277.29 277.54 277.78 278.02 278.27 278.51 278.75
273.60 273.60 274.81 276.63 277.20 277.45 277.70 277.95 278.20 278.45 278.71
273.52 273.52 274.66 276.49 277.09 277.35 277.61 277.87 278.13 278.39 278.65
273.54 273.54 274.59 276.38 276.98 277.25 277.52 277.79 278.06 278.33 278.60
273.50 273.50 274.53 276.28 276.88 277.16 277.44 277.72 277.99 278.27 278.55
273.47 273.47 274.47 276.20 276.80 277.09 277.37 277.66 277.94 278.23 278.51
273.40 273.40 274.40 276.12 276.72 277.02 277.31 277.60 277.89 278.18 278.47
273.38 273.38 274.35 276.04 276.64 276.94 277.24 277.54 277.84 278.13 278.43
273.37 273.37 274.32 275.97 276.57 276.88 277.18 277.49 277.79 278.10 278.40
273.35 273.35 274.28 275.90 276.50 276.81 277.12 277.43 277.74 278.06 278.37
273.29 273.29 274.22 275.83 276.43 276.75 277.07 277.38 277.70 278.02 278.33
273.25 273.25 274.17 275.76 276.37 276.69 277.01 277.33 277.65 277.98 278.30
273.24 273.24 274.13 275.70 276.31 276.63 276.96 277.29 277.61 277.94 278.27
273.24 273.24 274.10 275.65 276.25 276.58 276.92 277.25 277.58 277.91 278.24
273.24 273.24 274.08 275.59 276.20 276.53 276.87 277.21 277.54 277.88 278.22
273.24 273.24 274.06 275.55 276.15 276.49 276.83 277.17 277.51 277.85 278.19
273.25 273.25 274.04 275.50 276.10 276.45 276.79 277.13 277.48 277.82 278.17
273.28 273.28 274.04 275.46 276.06 276.40 276.75 277.10 277.45 277.80 278.15
273.29 273.29 274.03 275.43 276.02 276.37 276.72 277.07 277.42 277.78 278.13
273.25 273.25 274.01 275.38 275.97 276.33 276.68 277.04 277.39 277.75 278.11
273.27 273.27 273.99 275.35 275.94 276.30 276.66 277.01 277.37 277.73 278.09
273.09 273.09 273.89 275.30 275.89 276.25 276.62 276.98 277.34 277.70 278.07
273.04 273.04 273.82 275.26 275.85 276.22 276.58 276.95 277.32 277.68 278.05
273.11 273.11 273.84 275.22 275.81 276.18 276.55 276.92 277.29 277.66 278.03
273.19 273.19 273.89 275.20 275.79 276.16 276.53 276.90 277.27 277.64 278.01
273.09 273.09 273.84 275.17 275.76 276.13 276.51 276.88 277.25 277.63 278.00
273.09 273.09 273.84 275.17 275.76 276.13 276.51 276.88 277.25 277.63 278.00
272.95 272.95 273.68 274.88 275.45 275.85 276.25 276.65 277.05 277.45 277.85
272.95 272.95 273.68 274.88 275.45 275.85 276.25 276.65 277.05 277.45 277.85
272.95 272.95 273.68 274.88 275.45 275.85 276.25 276.65 277.05 277.45 277.85
272.95 272.95 273.65 274.82 275.41 275.81 276.21 276.62 277.02 277.43 277.83
272.95 272.95 273.65 274.78 275.36 275.76 276.17 276.58 276.99 277.40 277.80
272.95 272.95 273.65 274.78 275.36 275.76 276.17 276.58 276.99 277.40 277.80
272.95 272.95 273.65 274.78 275.36 275.76 276.17 276.58 276.99 277.40 277.80
272.95 272.95 273.65 274.77 275.33 275.74 276.15 276.56 276.97 277.38 277.79
272.95 272.95 273.65 274.72 275.26 275.68 276.09 276.51 276.93 277.34 277.76
272.95 272.95 273.65 274.72 275.26 275.68 276.09 276.51 276.93 277.34 277.76
272.95 272.95 273.64 274.70 275.26 275.68 276.09 276.51 276.93 277.34 277.76
272.95 272.95 273.56 274.68 275.26 275.68 276.09 276.51 276.93 277.34 277.76
272.92 272.92 273.55 274.62 275.18 275.60 276.02 276.45 276.87 277.29 277.72
272.90 272.90 273.55 274.62 275.17 275.59 276.02 276.44 276.86 277.29 277.71
272.92 272.92 273.55 274.62 275.17 275.59 276.02 276.44 276.86 277.29 277.71
272.95 272.95 273.55 274.62 275.17 275.59 276.02 276.44 276.86 277.29 277.71
272.88 272.88 273.53 274.57 275.13 275.56 275.99 276.41 276.84 277.27 277.69
272.85 272.85 273.52 274.52 275.07 275.51 275.94 276.37 276.80 277.23 277.67
272.85 272.85 273.52 274.52 275.07 275.51 275.94 276.37 276.80 277.23 277.67
272.86 272.86 273.52 274.52 275.07 275.51 275.94 276.37 276.80 277.23 277.67
272.85 272.85 273.53 274.52 275.07 275.51 275.94 276.37 276.80 277.23 277.67
272.85 272.85 273.58 274.51 275.07 275.50 275.93 276.37 276.80 277.23 277.66
272.88 272.88 273.58 274.48 275.02 275.46 275.89 276.33 276.77 277.20 277.64
272.95 272.95 273.58 274.52 275.07 275.51 275.94 276.37 276.80 277.23 277.67
272.95 272.95 273.58 274.52 275.07 275.51 275.94 276.37 276.80 277.23 277.67
272.95 272.95 273.58 274.49 275.04 275.48 275.91 276.35 276.78 277.22 277.65
272.95 272.95 273.58 274.45 274.98 275.42 275.86 276.30 276.74 277.18 277.62
272.95 272.95 273.57 274.45 274.98 275.42 275.86 276.30 276.74 277.18 277.62
272.95 272.95 273.52 274.45 274.98 275.42 275.86 276.30 276.74 277.18 277.62
272.95 272.95 273.52 274.45 274.98 275.42 275.86 276.30 276.74 277.18 277.62
272.90 272.90 273.49 274.42 274.98 275.42 275.86 276.30 276.74 277.18 277.62
272.95 272.95 273.49 274.42 274.98 275.42 275.86 276.30 276.74 277.18 277.62
272.91 272.91 273.48 274.38 274.93 275.38 275.82 276.26 276.71 277.15 277.60
272.85 272.85 273.48 274.35 274.89 275.33 275.78 276.23 276.68 277.13 277.57
272.85 272.85 273.48 274.35 274.89 275.33 275.78 276.23 276.68 277.13 277.57
272.85 272.85 273.48 274.35 274.89 275.33 275.78 276.23 276.68 277.13 277.57
272.85 272.85 273.48 274.35 274.88 275.33 275.78 276.23 276.68 277.12 277.57
272.85 272.85 273.48 274.32 274.84 275.29 275.74 276.19 276.65 277.10 277.55
272.85 272.85 273.48 274.28 274.79 275.25 275.70 276.16 276.62 277.07 277.53
272.85 272.85 273.48 274.28 274.79 275.25 275.70 276.16 276.62 277.07 277.53
272.85 272.85 273.48 274.28 274.79 275.25 275.70 276.16 276.62 277.07 277.53
272.86 272.86 273.48 274.28 274.79 275.25 275.70 276.16 276.62 277.07 277.53
272.95 272.95 273.48 274.28 274.79 275.25 275.70 276.16 276.62 277.07 277.53
272.95 272.95 273.48 274.28 274.79 275.25 275.70 276.16 276.62 277.07 277.53
272.95 272.95 273.48 274.28 274.79 275.25 275.70 276.16 276.62 277.07 277.53
272.95 272.95 273.48 274.28 274.79 275.25 275.70 276.16 276.62 277.07 277.53
272.93 272.93 273.45 274.25 274.79 275.25 275.70 276.16 276.62 277.07 277.53
272.85 272.85 273.45 274.19 274.71 275.17 275.64 276.10 276.56 277.03 277.49
272.85 272.85 273.45 274.18 274.70 275.16 275.63 276.09 276.55 277.02 277.48
272.94 272.94 273.45 274.23 274.77 275.23 275.68 276.14 276.60 277.06 277.52
272.95 272.95 273.45 274.23 274.77 275.23 275.68 276.14 276.60 277.06 277.52
272.95 272.95 273.45 274.20 274.72 275.18 275.64 276.11 276.57 277.03 277.49
272.95 272.95 273.45 274.18 274.70 275.16 275.63 276.09 276.55 277.02 277.48
272.95 272.95 273.45 274.18 274.70 275.16 275.63 276.09 276.55 277.02 277.48
272.95 272.95 273.45 274.18 274.70 275.16 275.63 276.09 276.55 277.02 277.48
272.94 272.94 273.45 274.18 274.70 275.16 275.63 276.09 276.55 277.02 277.48
272.85 272.85 273.45 274.18 274.69 275.16 275.62 276.09 276.55 277.02 277.48
272.85 272.85 273.44 274.14 274.64 275.11 275.58 276.05 276.52 276.99 277.46
272.85 272.85 273.43 274.10 274.61 275.08 275.55 276.02 276.49 276.97 277.44
272.95 272.95 273.38 274.24 274.81 275.27 275.72 276.18 276.63 277.08 277.54
272.95 272.95 273.38 274.23 274.80 275.25 275.71 276.16 276.62 277.08 277.53
272.95 272.95 273.37 274.21 274.78 275.23 275.69 276.15 276.61 277.06 277.52
272.95 272.95 273.37 274.19 274.76 275.21 275.67 276.13 276.59 277.05 277.51
272.95 272.95 273.37 274.18 274.73 275.19 275.65 276.12 276.58 277.04 277.50
272.95 272.95 273.37 274.16 274.71 275.17 275.64 276.10 276.56 277.03 277.49
272.96 272.96 273.37 274.14 274.69 275.16 275.62 276.09 276.55 277.01 277.48
272.97 272.97 273.37 274.13 274.67 275.14 275.61 276.07 276.54 277.00 277.47
272.96 272.96 273.36 274.11 274.65 275.12 275.59 276.05 276.52 276.99 277.46
272.97 272.97 273.37 274.10 274.64 275.11 275.57 276.04 276.51 276.98 277.45
272.97 272.97 273.37 274.09 274.62 275.09 275.56 276.03 276.50 276.97 277.44
272.97 272.97 273.36 274.08 274.61 275.08 275.56 276.03 276.50 276.97 277.44
272.97 272.97 273.36 274.08 274.61 275.08 275.55 276.02 276.50 276.97 277.44
272.97 272.97 273.36 274.18 274.75 275.21 275.67 276.13 276.59 277.05 277.51
272.97 272.97 273.36 274.18 274.75 275.21 275.67 276.13 276.59 277.05 277.51
272.98 272.98 273.36 274.18 274.75 275.21 275.67 276.13 276.59 277.05 277.51
272.95 272.95 273.36 274.17 274.74 275.20 275.66 276.12 276.58 277.04 277.50
272.95 272.95 273.36 274.16 274.73 275.19 275.65 276.12 276.58 277.04 277.50
272.95 272.95 273.36 274.15 274.72 275.18 275.65 276.11 276.57 277.03 277.49
272.95 272.95 273.35 274.14 274.71 275.17 275.64 276.10 276.56 277.03 277.49
272.95 272.95 273.35 274.13 274.70 275.17 275.63 276.09 276.56 277.02 277.48
272.95 272.95 273.35 274.12 274.69 275.16 275.62 276.09 276.55 277.01 277.48
272.95 272.95 273.34 274.11 274.68 275.15 275.61 276.08 276.54 277.01 277.47
272.95 272.95 273.34 274.10 274.67 275.14 275.60 276.07 276.54 277.00 277.47
272.95 272.95 273.34 274.09 274.66 275.13 275.60 276.06 276.53 277.00 277.46
272.95 272.95 273.33 274.08 274.65 275.12 275.59 276.06 276.52 276.99 277.46
272.95 272.95 273.33 274.07 274.64 275.11 275.58 276.05 276.52 276.99 277.45
272.95 272.95 273.33 274.06 274.63 275.10 275.57 276.04 276.51 276.98 277.45
272.95 272.95 273.33 274.05 274.62 275.09 275.56 276.03 276.50 276.97 277.44
272.95 272.95 273.32 274.04 274.61 275.08 275.55 276.03 276.50 276.97 277.44
272.95 272.95 273.32 274.03 274.60 275.07 275.55 276.02 276.49 276.96 277.43
272.95 272.95 273.32 274.02 274.59 275.06 275.54 276.01 276.48 276.96 277.43
272.95 272.95 273.31 274.01 274.58 275.05 275.53 276.00 276.48 276.95 277.42
272.95 272.95 273.31 274.00 274.57 275.05 275.52 276.00 276.47 276.94 277.42
272.95 272.95 273.31 273.99 274.56 275.04 275.51 275.99 276.46 276.94 277.41
272.95 272.95 273.31 273.98 274.55 275.03 275.50 275.98 276.46 276.93 277.41
272.95 272.95 273.30 273.97 274.54 275.02 275.50 275.97 276.45 276.93 277.40
272.92 272.92 273.23 273.97 274.53 275.01 275.49 275.97 276.44 276.92 277.40
272.92 272.92 273.22 273.96 274.52 275.00 275.48 275.96 276.44 276.91 277.39
272.92 272.92 273.22 273.95 274.51 274.99 275.47 275.95 276.43 276.91 277.39
272.92 272.92 273.22 273.94 274.50 274.98 275.46 275.94 276.42 276.90 277.38
272.92 272.92 273.21 273.93 274.49 274.97 275.45 275.94 276.42 276.90 277.38
272.93 272.93 273.22 273.93 274.50 274.98 275.46 275.94 276.42 276.90 277.38
272.93 272.93 273.22 273.94 274.50 274.98 275.46 275.94 276.42 276.90 277.38
273.00 273.00 273.24 273.93 274.49 274.97 275.45 275.93 276.42 276.90 277.38
273.66 273.66 273.56 273.94 274.49 274.97 275.45 275.93 276.41 276.90 277.38
274.98 274.98 274.04 274.01 274.52 275.00 275.48 275.96 276.44 276.92 277.40
276.60 276.60 274.89 274.20 274.61 275.09 275.56 276.03 276.50 276.97 277.44
277.25 277.25 275.78 274.54 274.81 275.26 275.71 276.17 276.62 277.08 277.53
277.15 277.15 275.86 274.86 275.07 275.50 275.94 276.37 276.80 277.23 277.67
277.00 277.00 276.24 275.14 275.30 275.72 276.13 276.54 276.95 277.37 277.78
278.87 278.87 276.67 275.36 275.52 275.91 276.30 276.70 277.09 277.49 277.88
280.45 280.45 277.84 275.71 275.73 276.11 276.48 276.86 277.24 277.61 277.99
281.13 281.13 278.59 276.16 276.07 276.42 276.76 277.11 277.46 277.81 278.15
281.87 281.87 279.32 276.65 276.46 276.77 277.09 277.40 277.71 278.03 278.34
282.88 282.88 280.09 277.15 276.86 277.14 277.42 277.70 277.98 278.26 278.54
283.76 283.76 280.96 277.68 277.29 277.54 277.78 278.02 278.27 278.51 278.75
283.65 283.65 281.27 278.19 277.74 277.95 278.15 278.36 278.56 278.77 278.97
283.06 283.06 281.28 278.58 278.14 278.31 278.48 278.65 278.82 278.99 279.16
282.70 282.70 281.22 278.85 278.44 278.59 278.73 278.88 279.02 279.17 279.31
281.77 281.77 280.89 279.02 278.67 278.79 278.92 279.04 279.17 279.30 279.42
280.27 280.27 280.20 279.07 278.80 278.92 279.03 279.15 279.26 279.38 279.49
279.44 279.44 279.55 278.97 278.82 278.93 279.05 279.16 279.27 279.39 279.50
279.58 279.58 279.36 278.82 278.76 278.88 278.99 279.11 279.23 279.35 279.47
279.52 279.52 279.18 278.71 278.68 278.81 278.93 279.06 279.18 279.31 279.43
280.03 280.03 279.26 278.53 278.47 278.61 278.76 278.90 279.04 279.18 279.33
280.67 280.67 279.56 278.54 278.45 278.59 278.74 278.88 279.03 279.17 279.32
281.43 281.43 279.97 278.63 278.49 278.63 278.77 278.91 279.05 279.20 279.34
282.17 282.17 280.45 278.78 278.58 278.72 278.85 278.98 279.12 279.25 279.38
282.84 282.84 281.03 278.99 278.73 278.85 278.97 279.09 279.21 279.33 279.45
283.10 283.10 281.37 279.25 278.92 279.03 279.13 279.23 279.34 279.44 279.55
283.75 283.75 281.88 279.52 279.14 279.22 279.31 279.40 279.48 279.57 279.65
284.08 284.08 282.28 279.81 279.38 279.44 279.51 279.57 279.64 279.71 279.77
283.69 283.69 282.31 280.07 279.61 279.66 279.70 279.75 279.79 279.84 279.89
282.86 282.86 282.06 280.23 279.80 279.83 279.86 279.89 279.92 279.95 279.98
282.71 282.71 281.81 280.28 279.91 279.93 279.95 279.97 279.99 280.01 280.03
282.79 282.79 281.81 280.30 279.96 279.98 280.00 280.01 280.03 280.04 280.06
282.57 282.57 281.76 280.37 280.05 280.06 280.07 280.08 280.08 280.09 280.10
282.62 282.62 281.72 280.39 280.07 280.08 280.08 280.09 280.10 280.10 280.11
282.31 282.31 281.70 280.42 280.11 280.11 280.12 280.12 280.12 280.13 280.13
282.61 282.61 281.65 280.43 280.14 280.15 280.15 280.15 280.15 280.15 280.15
282.98 282.98 281.96 280.48 280.18 280.18 280.18 280.17 280.17 280.17 280.17
282.76 282.76 281.90 280.56 280.26 280.25 280.24 280.23 280.22 280.21 280.20
283.26 283.26 282.15 280.64 280.33 280.31 280.30 280.28 280.27 280.25 280.24
282.81 282.81 282.05 280.74 280.41 280.39 280.37 280.34 280.32 280.30 280.28
282.85 282.85 282.08 280.79 280.48 280.45 280.42 280.39 280.36 280.34 280.31
282.57 282.57 281.98 280.83 280.52 280.49 280.46 280.43 280.39 280.36 280.33
282.45 282.45 281.90 280.84 280.56 280.53 280.49 280.46 280.42 280.39 280.35
282.50 282.50 281.81 280.85 280.59 280.55 280.51 280.47 280.44 280.40 280.36
282.88 282.88 282.06 280.87 280.60 280.56 280.52 280.48 280.45 280.41 280.37
282.56 282.56 281.95 280.92 280.64 280.60 280.56 280.52 280.47 280.43 280.39
282.80 282.80 281.98 280.94 280.67 280.63 280.58 280.54 280.49 280.45 280.40
284.79 284.79 282.73 281.01 280.71 280.66 280.61 280.57 280.52 280.47 280.42
285.85 285.85 283.75 281.28 280.84 280.79 280.73 280.67 280.61 280.55 280.49
285.24 285.24 283.88 281.62 281.10 281.02 280.94 280.86 280.78 280.70 280.61
285.56 285.56 284.05 281.86 281.33 281.23 281.13 281.03 280.93 280.83 280.73
285.45 285.45 284.16 282.06 281.52 281.41 281.29 281.17 281.05 280.94 280.82
285.35 285.35 284.11 282.21 281.69 281.56 281.42 281.29 281.16 281.03 280.90
285.74 285.74 284.26 282.34 281.81 281.67 281.53 281.39 281.25 281.11 280.96
286.33 286.33 284.60 282.49 281.95 281.79 281.64 281.49 281.33 281.18 281.03
286.54 286.54 284.87 282.69 282.10 281.94 281.77 281.60 281.44 281.27 281.11
286.75 286.75 285.02 282.88 282.28 282.10 281.92 281.74 281.55 281.37 281.19
287.11 287.11 285.23 283.06 282.44 282.25 282.05 281.86 281.66 281.47 281.27
287.15 287.15 285.41 283.24 282.62 282.41 282.20 281.99 281.78 281.57 281.36
286.44 286.44 285.43 283.63 283.06 282.81 282.57 282.32 282.07 281.82 281.57
285.21 285.21 284.98 283.72 283.19 282.93 282.67 282.42 282.16 281.90 281.64
285.09 285.09 284.67 283.68 283.23 282.96 282.70 282.44 282.18 281.92 281.66
285.25 285.25 284.58 283.60 283.18 282.92 282.66 282.41 282.15 281.89 281.63
285.50 285.50 284.60 283.55 283.14 282.88 282.63 282.38 282.12 281.87 281.61
285.65 285.65 284.68 283.54 283.13 282.87 282.62 282.37 282.11 281.86 281.61
285.86 285.86 284.78 283.58 283.15 282.90 282.64 282.38 282.13 281.87 281.62
286.02 286.02 284.94 283.65 283.20 282.94 282.68 282.42 282.16 281.90 281.64
286.02 286.02 285.01 283.73 283.27 283.00 282.74 282.47 282.21 281.94 281.68
285.79 285.79 284.97 283.78 283.32 283.05 282.78 282.51 282.24 281.97 281.70
285.81 285.81 285.00 283.82 283.36 283.09 282.81 282.54 282.27 281.99 281.72
285.70 285.70 284.97 283.88 283.42 283.14 282.87 282.59 282.31 282.03 281.75
285.81 285.81 284.99 283.89 283.44 283.16 282.88 282.60 282.32 282.04 281.76
285.95 285.95 285.03 283.91 283.46 283.18 282.90 282.62 282.33 282.05 281.77
286.18 286.18 285.13 283.93 283.47 283.19 282.91 282.62 282.34 282.06 281.78
286.52 286.52 285.26 283.98 283.51 283.23 282.94 282.65 282.37 282.08 281.80
287.02 287.02 285.48 284.06 283.57 283.27 282.98 282.69 282.40 282.11 281.82
287.49 287.49 285.78 284.17 283.64 283.34 283.04 282.75 282.45 282.15 281.86
288.01 288.01 286.08 284.33 283.76 283.45 283.14 282.84 282.53 282.22 281.92
288.49 288.49 286.47 284.54 283.92 283.60 283.28 282.96 282.64 282.32 281.99
288.35 288.35 286.68 284.72 284.05 283.72 283.39 283.06 282.72 282.39 282.06
287.11 287.11 286.44 284.83 284.15 283.81 283.47 283.13 282.79 282.45 282.11
286.83 286.83 286.13 284.86 284.24 283.89 283.54 283.20 282.85 282.50 282.15
287.38 287.38 286.15 284.85 284.27 283.92 283.57 283.22 282.87 282.52 282.17
287.85 287.85 286.35 284.88 284.30 283.94 283.59 283.24 282.88 282.53 282.18
288.18 288.18 286.53 284.96 284.36 284.00 283.64 283.28 282.93 282.57 282.21
288.63 288.63 286.79 285.07 284.44 284.07 283.71 283.34 282.98 282.61 282.25
288.67 288.67 286.97 285.25 284.61 284.23 283.85 283.47 283.09 282.71 282.33
288.75 288.75 287.11 285.45 284.82 284.42 284.03 283.63 283.23 282.83 282.44
288.48 288.48 287.25 285.66 285.01 284.60 284.18 283.77 283.35 282.94 282.53
287.84 287.84 287.08 285.69 285.03 284.61 284.20 283.78 283.37 282.95 282.54
287.36 287.36 286.79 285.61 284.97 284.56 284.15 283.74 283.33 282.92 282.51
287.36 287.36 286.63 285.54 284.94 284.54 284.13 283.72 283.31 282.90 282.50
287.54 287.54 286.61 285.51 284.94 284.53 284.12 283.71 283.31 282.90 282.49
287.59 287.59 286.63 285.49 284.91 284.50 284.10 283.69 283.29 282.88 282.48
287.88 287.88 286.68 285.47 284.89 284.48 284.08 283.68 283.28 282.87 282.47
287.87 287.87 286.76 285.49 284.90 284.49 284.09 283.69 283.28 282.88 282.47
287.97 287.97 286.78 285.52 284.92 284.52 284.11 283.70 283.30 282.89 282.48
288.52 288.52 287.01 285.63 285.02 284.61 284.19 283.78 283.36 282.95 282.53
289.10 289.10 287.30 285.71 285.05 284.63 284.22 283.80 283.38 282.97 282.55
289.52 289.52 287.57 285.81 285.12 284.69 284.27 283.85 283.43 283.00 282.58
289.30 289.30 287.73 285.94 285.21 284.78 284.35 283.92 283.49 283.06 282.63
288.53 288.53 287.54 286.03 285.32 284.88 284.44 284.00 283.56 283.12 282.68
288.60 288.60 287.44 286.06 285.38 284.94 284.49 284.05 283.60 283.16 282.71
289.01 289.01 287.54 286.08 285.42 284.97 284.52 284.07 283.62 283.17 282.73
289.34 289.34 287.68 286.13 285.45 285.00 284.55 284.10 283.65 283.20 282.75
289.43 289.43 287.81 286.20 285.51 285.05 284.60 284.14 283.68 283.23 282.77
289.24 289.24 287.85 286.27 285.57 285.11 284.65 284.19 283.72 283.26 282.80
288.66 288.66 287.67 286.31 285.62 285.15 284.69 284.22 283.76 283.29 282.83
287.93 287.93 287.41 286.29 285.64 285.18 284.71 284.24 283.77 283.31 282.84
287.36 287.36 287.05 286.22 285.62 285.16 284.69 284.22 283.76 283.29 282.83
287.44 287.44 286.87 286.11 285.55 285.09 284.63 284.17 283.71 283.25 282.79
287.74 287.74 286.86 286.06 285.54 285.08 284.62 284.16 283.70 283.25 282.79
288.24 288.24 287.07 286.05 285.50 285.05 284.59 284.14 283.68 283.22 282.77
288.09 288.09 287.12 286.05 285.49 285.03 284.58 284.12 283.67 283.22 282.76
288.53 288.53 287.24 286.13 285.54 285.08 284.63 284.17 283.71 283.25 282.79
288.49 288.49 287.42 286.22 285.60 285.14 284.67 284.21 283.74 283.28 282.82
287.77 287.77 287.25 286.23 285.62 285.15 284.69 284.22 283.76 283.29 282.83
287.48 287.48 287.05 286.20 285.61 285.15 284.68 284.22 283.75 283.29 282.82
287.03 287.03 286.80 286.13 285.58 285.12 284.66 284.20 283.73 283.27 282.81
287.09 287.09 286.64 286.03 285.52 285.06 284.60 284.15 283.69 283.23 282.78
286.92 286.92 286.51 285.94 285.44 284.99 284.54 284.09 283.64 283.19 282.74
286.88 286.88 286.38 285.84 285.36 284.91 284.47 284.03 283.58 283.14 282.70
287.04 287.04 286.37 285.75 285.28 284.84 284.41 283.97 283.53 283.10 282.66
287.49 287.49 286.45 285.70 285.21 284.78 284.35 283.92 283.49 283.06 282.63
287.75 287.75 286.63 285.72 285.21 284.78 284.35 283.92 283.49 283.06 282.63
287.80 287.80 286.82 285.82 285.27 284.84 284.40 283.96 283.53 283.09 282.66
287.39 287.39 286.72 285.85 285.29 284.86 284.42 283.98 283.54 283.10 282.67
287.21 287.21 286.64 285.84 285.30 284.86 284.43 283.99 283.55 283.11 282.67
286.80 286.80 286.46 285.81 285.29 284.85 284.42 283.98 283.54 283.10 282.67
287.12 287.12 286.40 285.75 285.25 284.82 284.38 283.95 283.51 283.08 282.65
287.31 287.31 286.49 285.72 285.22 284.79 284.36 283.93 283.49 283.06 282.63
287.38 287.38 286.53 285.73 285.21 284.78 284.35 283.92 283.49 283.06 282.63
287.25 287.25 286.53 285.74 285.22 284.79 284.36 283.93 283.49 283.06 282.63
287.43 287.43 286.54 285.74 285.22 284.79 284.36 283.93 283.49 283.06 282.63
288.17 288.17 286.74 285.75 285.23 284.79 284.36 283.93 283.50 283.07 282.63
288.24 288.24 286.97 285.82 285.26 284.83 284.39 283.96 283.52 283.09 282.65
287.47 287.47 286.89 285.90 285.32 284.88 284.44 284.00 283.56 283.12 282.68
287.01 287.01 286.65 285.91 285.36 284.91 284.47 284.03 283.58 283.14 282.70
286.92 286.92 286.54 285.87 285.35 284.91 284.47 284.02 283.58 283.14 282.70
286.70 286.70 286.44 285.85 285.35 284.91 284.46 284.02 283.58 283.14 282.69
286.73 286.73 286.37 285.81 285.32 284.88 284.44 284.00 283.56 283.12 282.68
286.63 286.63 286.32 285.76 285.28 284.84 284.41 283.97 283.53 283.10 282.66
286.60 286.60 286.24 285.72 285.24 284.81 284.37 283.94 283.51 283.07 282.64
286.68 286.68 286.20 285.67 285.20 284.77 284.34 283.91 283.48 283.05 282.62
286.57 286.57 286.19 285.64 285.17 284.75 284.32 283.89 283.46 283.04 282.61
286.26 286.26 286.05 285.61 285.15 284.72 284.30 283.87 283.45 283.02 282.60
286.32 286.32 285.98 285.56 285.11 284.69 284.27 283.85 283.42 283.00 282.58
286.36 286.36 285.97 285.51 285.07 284.65 284.23 283.81 283.39 282.97 282.56
286.14 286.14 285.91 285.48 285.04 284.62 284.21 283.79 283.37 282.96 282.54
285.98 285.98 285.79 285.43 285.01 284.59 284.18 283.77 283.35 282.94 282.53
285.82 285.82 285.70 285.38 284.96 284.55 284.15 283.74 283.33 282.92 282.51
285.84 285.84 285.62 285.32 284.92 284.51 284.11 283.70 283.30 282.89 282.48
285.60 285.60 285.53 285.28 284.88 284.47 284.07 283.67 283.27 282.87 282.46
286.20 286.20 285.62 285.23 284.84 284.44 284.04 283.64 283.24 282.84 282.44
285.67 285.67 285.62 285.23 284.81 284.41 284.02 283.62 283.22 282.83 282.43
285.48 285.48 285.42 285.20 284.80 284.41 284.01 283.61 283.22 282.82 282.43
284.73 284.73 285.13 285.13 284.76 284.37 283.98 283.58 283.19 282.80 282.41
284.32 284.32 284.77 285.00 284.68 284.29 283.91 283.52 283.14 282.75 282.37
284.81 284.81 284.72 284.84 284.56 284.18 283.81 283.43 283.06 282.68 282.31
285.25 285.25 284.96 284.78 284.47 284.10 283.73 283.36 283.00 282.63 282.26
284.98 284.98 284.99 284.78 284.44 284.07 283.71 283.34 282.98 282.61 282.25
283.89 283.89 284.49 284.74 284.42 284.06 283.70 283.33 282.97 282.60 282.24
282.85 282.85 283.92 284.59 284.34 283.98 283.63 283.27 282.91 282.56 282.20
282.56 282.56 283.43 284.34 284.18 283.84 283.50 283.15 282.81 282.47 282.12
281.91 281.91 282.98 284.08 283.98 283.66 283.33 283.01 282.68 282.35 282.03
283.21 283.21 283.21 283.85 283.78 283.47 283.16 282.85 282.54 282.23 281.92
282.45 282.45 283.12 283.76 283.64 283.34 283.05 282.75 282.45 282.16 281.86
282.10 282.10 282.79 283.63 283.54 283.25 282.96 282.67 282.38 282.10 281.81
283.51 283.51 283.12 283.49 283.40 283.13 282.85 282.57 282.30 282.02 281.74
282.71 282.71 283.16 283.49 283.34 283.07 282.80 282.53 282.25 281.98 281.71
281.39 281.39 282.53 283.41 283.31 283.04 282.77 282.50 282.23 281.97 281.70
282.14 282.14 282.49 283.23 283.18 282.92 282.67 282.41 282.15 281.89 281.63
281.30 281.30 282.19 283.10 283.05 282.81 282.56 282.31 282.07 281.82 281.57
281.57 281.57 282.11 282.95 282.93 282.69 282.46 282.22 281.98 281.75 281.51
281.38 281.38 281.98 282.82 282.81 282.58 282.36 282.13 281.90 281.68 281.45
282.03 282.03 282.20 282.73 282.70 282.48 282.27 282.05 281.83 281.62 281.40
281.28 281.28 281.92 282.67 282.63 282.42 282.21 282.00 281.79 281.58 281.37
279.87 279.87 281.30 282.54 282.55 282.35 282.14 281.94 281.73 281.53 281.33
279.82 279.82 280.88 282.29 282.39 282.20 282.01 281.82 281.63 281.44 281.25
280.27 280.27 280.93 282.08 282.20 282.02 281.85 281.67 281.50 281.33 281.15
278.94 278.94 280.40 281.92 282.05 281.88 281.72 281.56 281.40 281.24 281.08
279.14 279.14 280.21 281.70 281.88 281.73 281.58 281.44 281.29 281.14 280.99
278.28 278.28 279.78 281.49 281.70 281.57 281.44 281.30 281.17 281.04 280.91
277.82 277.82 279.28 281.23 281.50 281.38 281.27 281.15 281.04 280.92 280.81
278.23 278.23 279.21 280.97 281.27 281.17 281.08 280.98 280.89 280.79 280.70
278.79 278.79 279.40 280.80 281.08 281.00 280.92 280.84 280.77 280.69 280.61
279.15 279.15 279.58 280.73 280.97 280.90 280.83 280.76 280.69 280.62 280.55
279.15 279.15 279.68 280.70 280.90 280.84 280.77 280.71 280.65 280.58 280.52
279.10 279.10 279.66 280.67 280.86 280.80 280.74 280.68 280.62 280.56 280.50
278.31 278.31 279.38 280.62 280.81 280.75 280.70 280.64 280.59 280.53 280.47
277.85 277.85 278.98 280.48 280.72 280.67 280.63 280.58 280.53 280.48 280.43
277.66 277.66 278.81 280.32 280.59 280.55 280.52 280.48 280.44 280.40 280.37
278.15 278.15 278.78 280.16 280.45 280.43 280.40 280.37 280.35 280.32 280.30
278.17 278.17 278.84 280.06 280.34 280.32 280.30 280.29 280.27 280.26 280.24
278.33 278.33 278.87 280.00 280.26 280.25 280.24 280.23 280.22 280.21 280.20
278.46 278.46 278.96 279.96 280.20 280.20 280.19 280.19 280.18 280.18 280.17
278.71 278.71 279.04 279.94 280.16 280.16 280.16 280.16 280.16 280.16 280.16
278.95 278.95 279.22 279.94 280.14 280.14 280.14 280.14 280.14 280.14 280.14
278.66 278.66 279.15 279.96 280.14 280.14 280.14 280.14 280.14 280.14 280.14
279.21 279.21 279.31 279.95 280.13 280.13 280.13 280.13 280.14 280.14 280.14
278.71 278.71 279.27 279.98 280.13 280.13 280.13 280.13 280.14 280.14 280.14
279.53 279.53 279.42 279.97 280.12 280.12 280.13 280.13 280.13 280.13 280.14
279.78 279.78 279.72 280.02 280.13 280.13 280.13 280.14 280.14 280.14 280.14
279.84 279.84 279.84 280.10 280.18 280.18 280.18 280.17 280.17 280.17 280.17
279.77 279.77 279.87 280.16 280.23 280.22 280.22 280.21 280.20 280.20 280.19
279.65 279.65 279.85 280.20 280.27 280.26 280.25 280.24 280.23 280.22 280.21
279.40 279.40 279.74 280.21 280.29 280.28 280.26 280.25 280.24 280.23 280.22
279.30 279.30 279.66 280.19 280.28 280.27 280.26 280.25 280.24 280.23 280.22
278.58 278.58 279.43 280.16 280.27 280.26 280.25 280.24 280.23 280.22 280.21
277.69 277.69 278.93 280.05 280.21 280.21 280.20 280.20 280.19 280.19 280.18
277.77 277.77 278.61 279.87 280.10 280.10 280.11 280.11 280.12 280.12 280.12
277.96 277.96 278.63 279.71 279.96 279.97 279.99 280.01 280.02 280.04 280.06
277.72 277.72 278.50 279.60 279.85 279.87 279.90 279.93 279.95 279.98 280.00
277.50 277.50 278.32 279.49 279.75 279.79 279.82 279.85 279.89 279.92 279.96
277.14 277.14 278.17 279.38 279.65 279.69 279.73 279.78 279.82 279.86 279.90
276.24 276.24 277.68 279.24 279.55 279.60 279.65 279.70 279.75 279.80 279.85
276.07 276.07 277.33 279.03 279.40 279.46 279.53 279.59 279.65 279.72 279.78
276.41 276.41 277.27 278.83 279.22 279.30 279.38 279.46 279.54 279.62 279.70
276.64 276.64 277.34 278.68 279.07 279.16 279.25 279.35 279.44 279.53 279.62
276.12 276.12 277.18 278.58 278.96 279.06 279.16 279.26 279.36 279.46 279.57
275.07 275.07 276.62 278.44 278.86 278.97 279.08 279.19 279.30 279.41 279.52
274.75 274.75 276.21 278.22 278.70 278.82 278.95 279.07 279.19 279.32 279.44
274.77 274.77 276.05 278.00 278.51 278.65 278.79 278.93 279.07 279.21 279.35
274.98 274.98 276.01 277.82 278.33 278.49 278.64 278.80 278.95 279.11 279.26
275.38 275.38 276.12 277.69 278.19 278.36 278.53 278.69 278.86 279.03 279.19
275.81 275.81 276.32 277.62 278.09 278.26 278.44 278.61 278.79 278.96 279.14
274.90 274.90 276.04 277.57 278.03 278.21 278.39 278.57 278.75 278.93 279.11
274.45 274.45 275.72 277.46 277.95 278.14 278.33 278.51 278.70 278.89 279.07
274.02 274.02 275.38 277.29 277.83 278.03 278.22 278.42 278.62 278.82 279.01
274.47 274.47 275.31 277.11 277.68 277.89 278.10 278.31 278.52 278.73 278.94
274.71 274.71 275.49 277.01 277.55 277.77 277.99 278.21 278.44 278.66 278.88
275.16 275.16 275.64 276.97 277.48 277.71 277.93 278.16 278.39 278.62 278.84
274.38 274.38 275.49 276.95 277.44 277.67 277.90 278.13 278.36 278.59 278.82
274.10 274.10 275.17 276.86 277.39 277.62 277.86 278.09 278.33 278.56 278.80
273.95 273.95 275.06 276.75 277.29 277.54 277.78 278.02 278.27 278.51 278.75
273.60 273.60 274.81 276.63 277.20 277.45 277.70 277.95 278.20 278.45 278.71
273.52 273.52 274.66 276.49 277.09 277.35 277.61 277.87 278.13 278.39 278.65
273.54 273.54 274.59 276.38 276.98 277.25 277.52 277.79 278.06 278.33 278.60
273.50 273.50 274.53 276.28 276.88 277.16 277.44 277.72 277.99 278.27 278.55
273.47 273.47 274.47 276.20 276.80 277.09 277.37 277.66 277.94 278.23 278.51
273.40 273.40 274.40 276.12 276.72 277.02 277.31 277.60 277.89 278.18 278.47
273.38 273.38 274.35 276.04 276.64 276.94 277.24 277.54 277.84 278.13 278.43
273.37 273.37 274.32 275.97 276.57 276.88 277.18 277.49 277.79 278.10 278.40
273.35 273.35 274.28 275.90 276.50 276.81 277.12 277.43 277.74 278.06 278.37
273.29 273.29 274.22 275.83 276.43 276.75 277.07 277.38 277.70 278.02 278.33
273.25 273.25 274.17 275.76 276.37 276.69 277.01 277.33 277.65 277.98 278.30
273.24 273.24 274.13 275.70 276.31 276.63 276.96 277.29 277.61 277.94 278.27
273.24 273.24 274.10 275.65 276.25 276.58 276.92 277.25 277.58 277.91 278.24
273.24 273.24 274.08 275.59 276.20 276.53 276.87 277.21 277.54 277.88 278.22
273.24 273.24 274.06 275.55 276.15 276.49 276.83 277.17 277.51 277.85 278.19
273.25 273.25 274.04 275.50 276.10 276.45 276.79 277.13 277.48 277.82 278.17
273.28 273.28 274.04 275.46 276.06 276.40 276.75 277.10 277.45 277.80 278.15
273.29 273.29 274.03 275.43 276.02 276.37 276.72 277.07 277.42 277.78 278.13
273.25 273.25 274.01 275.38 275.97 276.33 276.68 277.04 277.39 277.75 278.11
273.27 273.27 273.99 275.35 275.94 276.30 276.66 277.01 277.37 277.73 278.09
273.09 273.09 273.89 275.30 275.89 276.25 276.62 276.98 277.34 277.70 278.07
273.04 273.04 273.82 275.26 275.85 276.22 276.58 276.95 277.32 277.68 278.05
273.11 273.11 273.84 275.22 275.81 276.18 276.55 276.92 277.29 277.66 278.03
273.19 273.19 273.89 275.20 275.79 276.16 276.53 276.90 277.27 277.64 278.01
273.09 273.09 273.84 275.17 275.76 276.13 276.51 276.88 277.25 277.63 278.00
273.09 273.09 273.84 275.17 275.76 276.13 276.51 276.88 277.25 277.63 278.00
272.95 272.95 273.68 274.88 275.45 275.85 276.25 276.65 277.05 277.45 277.85
272.95 272.95 273.68 274.88 275.45 275.85 276.25 276.65 277.05 277.45 277.85
272.95 272.95 273.68 274.88 275.45 275.85 276.25 276.65 277.05 277.45 277.85
272.95 272.95 273.65 274.82 275.41 275.81 276.21 276.62 277.02 277.43 277.83
272.95 272.95 273.65 274.78 275.36 275.76 276.17 276.58 276.99 277.40 277.80
272.95 272.95 273.65 274.78 275.36 275.76 276.17 276.58 276.99 277.40 277.80
272.95 272.95 273.65 274.78 275.36 275.76 276.17 276.58 276.99 277.40 277.80
272.95 272.95 273.65 274.77 275.33 275.74 276.15 276.56 276.97 277.38 277.79
272.95 272.95 273.65 274.72 275.26 275.68 276.09 276.51 276.93 277.34 277.76
272.95 272.95 273.65 274.72 275.26 275.68 276.09 276.51 276.93 277.34 277.76
272.95 272.95 273.64 274.70 275.26 275.68 276.09 276.51 276.93 277.34 277.76
272.95 272.95 273.56 274.68 275.26 275.68 276.09 276.51 276.93 277.34 277.76
272.92 272.92 273.55 274.62 275.18 275.60 276.02 276.45 276.87 277.29 277.72
272.90 272.90 273.55 274.62 275.17 275.59 276.02 276.44 276.86 277.29 277.71
272.92 272.92 273.55 274.62 275.17 275.59 276.02 276.44 276.86 277.29 277.71
272.95 272.95 273.55 274.62 275.17 275.59 276.02 276.44 276.86 277.29 277.71
272.88 272.88 273.53 274.57 275.13 275.56 275.99 276.41 276.84 277.27 277.69
272.85 272.85 273.52 274.52 275.07 275.51 275.94 276.37 276.80 277.23 277.67
272.85 272.85 273.52 274.52 275.07 275.51 275.94 276.37 276.80 277.23 277.67
272.86 272.86 273.52 274.52 275.07 275.51 275.94 276.37 276.80 277.23 277.67
272.85 272.85 273.53 274.52 275.07 275.51 275.94 276.37 276.80 277.23 277.67
272.85 272.85 273.58 274.51 275.07 275.50 275.93 276.37 276.80 277.23 277.66
272.88 272.88 273.58 274.48 275.02 275.46 275.89 276.33 276.77 277.20 277.64
272.95 272.95 273.58 274.52 275.07 275.51 275.94 276.37 276.80 277.23 277.67
272.95 272.95 273.58 274.52 275.07 275.51 275.94 276.37 276.80 277.23 277.67
272.95 272.95 273.58 274.49 275.04 275.48 275.91 276.35 276.78 277.22 277.65
272.95 272.95 273.58 274.45 274.98 275.42 275.86 276.30 276.74 277.18 277.62
272.95 272.95 273.57 274.45 274.98 275.42 275.86 276.30 276.74 277.18 277.62
272.95 272.95 273.52 274.45 274.98 275.42 275.86 276.30 276.74 277.18 277.62
272.95 272.95 273.52 274.45 274.98 275.42 275.86 276.30 276.74 277.18 277.62
272.90 272.90 273.49 274.42 274.98 275.42 275.86 276.30 276.74 277.18 277.62
272.95 272.95 273.49 274.42 274.98 275.42 275.86 276.30 276.74 277.18 277.62
272.91 272.91 273.48 274.38 274.93 275.38 275.82 276.26 276.71 277.15 277.60
272.85 272.85 273.48 274.35 274.89 275.33 275.78 276.23 276.68 277.13 277.57
272.85 272.85 273.48 274.35 274.89 275.33 275.78 276.23 276.68 277.13 277.57
272.85 272.85 273.48 274.35 274.89 275.33 275.78 276.23 276.68 277.13 277.57
272.85 272.85 273.48 274.35 274.88 275.33 275.78 276.23 276.68 277.12 277.57
272.85 272.85 273.48 274.32 274.84 275.29 275.74 276.19 276.65 277.10 277.55
272.85 272.85 273.48 274.28 274.79 275.25 275.70 276.16 276.62 277.07 277.53
272.85 272.85 273.48 274.28 274.79 275.25 275.70 276.16 276.62 277.07 277.53
272.85 272.85 273.48 274.28 274.79 275.25 275.70 276.16 276.62 277.07 277.53
272.86 272.86 273.48 274.28 274.79 275.25 275.70 276.16 276.62 277.07 277.53
272.95 272.95 273.48 274.28 274.79 275.25 275.70 276.16 276.62 277.07 277.53
272.95 272.95 273.48 274.28 274.79 275.25 275.70 276.16 276.62 277.07 277.53
272.95 272.95 273.48 274.28 274.79 275.25 275.70 276.16 276.62 277.07 277.53
272.95 272.95 273.48 274.28 274.79 275.25 275.70 276.16 276.62 277.07 277.53
272.93 272.93 273.45 274.25 274.79 275.25 275.70 276.16 276.62 277.07 277.53
272.85 272.85 273.45 274.19 274.71 275.17 275.64 276.10 276.56 277.03 277.49
272.85 272.85 273.45 274.18 274.70 275.16 275.63 276.09 276.55 277.02 277.48
272.94 272.94 273.45 274.23 274.77 275.23 275.68 276.14 276.60 277.06 277.52
272.95 272.95 273.45 274.23 274.77 275.23 275.68 276.14 276.60 277.06 277.52
272.95 272.95 273.45 274.20 274.72 275.18 275.64 276.11 276.57 277.03 277.49
272.95 272.95 273.45 274.18 274.70 275.16 275.63 276.09 276.55 277.02 277.48
272.95 272.95 273.45 274.18 274.70 275.16 275.63 276.09 276.55 277.02 277.48
272.95 272.95 273.45 274.18 274.70 275.16 275.63 276.09 276.55 277.02 277.48
272.94 272.94 273.45 274.18 274.70 275.16 275.63 276.09 276.55 277.02 277.48
272.85 272.85 273.45 274.18 274.69 275.16 275.62 276.09 276.55 277.02 277.48
272.85 272.85 273.44 274.14 274.64 275.11 275.58 276.05 276.52 276.99 277.46
272.85 272.85 273.43 274.10 274.61 275.08 275.55 276.02 276.49 276.97 277.44
272.95 272.95 273.38 274.24 274.81 275.27 275.72 276.18 276.63 277.08 277.54
272.95 272.95 273.38 274.23 274.80 275.25 275.71 276.16 276.62 277.08 277.53
272.95 272.95 273.37 274.21 274.78 275.23 275.69 276.15 276.61 277.06 277.52
272.95 272.95 273.37 274.19 274.76 275.21 275.67 276.13 276.59 277.05 277.51
272.95 272.95 273.37 274.18 274.73 275.19 275.65 276.12 276.58 277.04 277.50
272.95 272.95 273.37 274.16 274.71 275.17 275.64 276.10 276.56 277.03 277.49
272.96 272.96 273.37 274.14 274.69 275.16 275.62 276.09 276.55 277.01 277.48
272.97 272.97 273.37 274.13 274.67 275.14 275.61 276.07 276.54 277.00 277.47
272.96 272.96 273.36 274.11 274.65 275.12 275.59 276.05 276.52 276.99 277.46
272.97 272.97 273.37 274.10 274.64 275.11 275.57 276.04 276.51 276.98 277.45
272.97 272.97 273.37 274.09 274.62 275.09 275.56 276.03 276.50 276.97 277.44
272.97 272.97 273.36 274.08 274.61 275.08 275.56 276.03 276.50 276.97 277.44
272.97 272.97 273.36 274.08 274.61 275.08 275.55 276.02 276.50 276.97 277.44
272.97 272.97 273.36 274.18 274.75 275.21 275.67 276.13 276.59 277.05 277.51
272.97 272.97 273.36 274.18 274.75 275.21 275.67 276.13 276.59 277.05 277.51
272.98 272.98 273.36 274.18 274.75 275.21 275.67 276.13 276.59 277.05 277.51
272.95 272.95 273.36 274.17 274.74 275.20 275.66 276.12 276.58 277.04 277.50
272.95 272.95 273.36 274.16 274.73 275.19 275.65 276.12 276.58 277.04 277.50
272.95 272.95 273.36 274.15 274.72 275.18 275.65 276.11 276.57 277.03 277.49
272.95 272.95 273.35 274.14 274.71 275.17 275.64 276.10 276.56 277.03 277.49
272.95 272.95 273.35 274.13 274.70 275.17 275.63 276.09 276.56 277.02 277.48
272.95 272.95 273.35 274.12 274.69 275.16 275.62 276.09 276.55 277.01 277.48
272.95 272.95 273.34 274.11 274.68 275.15 275.61 276.08 276.54 277.01 277.47
272.95 272.95 273.34 274.10 274.67 275.14 275.60 276.07 276.54 277.00 277.47
272.95 272.95 273.34 274.09 274.66 275.13 275.60 276.06 276.53 277.00 277.46
272.95 272.95 273.33 274.08 274.65 275.12 275.59 276.06 276.52 276.99 277.46
272.95 272.95 273.33 274.07 274.64 275.11 275.58 276.05 276.52 276.99 277.45
272.95 272.95 273.33 274.06 274.63 275.10 275.57 276.04 276.51 276.98 277.45
272.95 272.95 273.33 274.05 274.62 275.09 275.56 276.03 276.50 276.97 277.44
272.95 272.95 273.32 274.04 274.61 275.08 275.55 276.03 276.50 276.97 277.44
272.95 272.95 273.32 274.03 274.60 275.07 275.55 276.02 276.49 276.96 277.43
272.95 272.95 273.32 274.02 274.59 275.06 275.54 276.01 276.48 276.96 277.43
272.95 272.95 273.31 274.01 274.58 275.05 275.53 276.00 276.48 276.95 277.42
272.95 272.95 273.31 274.00 274.57 275.05 275.52 276.00 276.47 276.94 277.42
272.95 272.95 273.31 273.99 274.56 275.04 275.51 275.99 276.46 276.94 277.41
272.95 272.95 273.31 273.98 274.55 275.03 275.50 275.98 276.46 276.93 277.41
272.95 272.95 273.30 273.97 274.54 275.02 275.50 275.97 276.45 276.93 277.40
272.92 272.92 273.23 273.97 274.53 275.01 275.49 275.97 276.44 276.92 277.40
272.92 272.92 273.22 273.96 274.52 275.00 275.48 275.96 276.44 276.91 277.39
272.92 272.92 273.22 273.95 274.51 274.99 275.47 275.95 276.43 276.91 277.39
272.92 272.92 273.22 273.94 274.50 274.98 275.46 275.94 276.42 276.90 277.38
272.92 272.92 273.21 273.93 274.49 274.97 275.45 275.94 276.42 276.90 277.38
272.93 272.93 273.22 273.93 274.50 274.98 275.46 275.94 276.42 276.90 277.38
272.93 272.93 273.22 273.94 274.50 274.98 275.46 275.94 276.42 276.90 277.38
273.00 273.00 273.24 273.93 274.49 274.97 275.45 275.93 276.42 276.90 277.38
273.66 273.66 273.56 273.94 274.49 274.97 275.45 275.93 276.41 276.90 277.38
274.98 274.98 274.04 274.01 274.52 275.00 275.48 275.96 276.44 276.92 277.40
276.60 276.60 274.89 274.20 274.61 275.09 275.56 276.03 276.50 276.97 277.44
277.25 277.25 275.78 274.54 274.81 275.26 275.71 276.17 276.62 277.08 277.53
277.15 277.15 275.86 274.86 275.07 275.50 275.94 276.37 276.80 277.23 277.67
277.00 277.00 276.24 275.14 275.30 275.72 276.13 276.54 276.95 277.37 277.78
278.87 278.87 276.67 275.36 275.52 275.91 276.30 276.70 277.09 277.49 277.88
280.45 280.45 277.84 275.71 275.73 276.11 276.48 276.86 277.24 277.61 277.99
281.13 281.13 278.59 276.16 276.07 276.42 276.76 277.11 277.46 277.81 278.15
281.87 281.87 279.32 276.65 276.46 276.77 277.09 277.40 277.71 278.03 278.34
282.88 282.88 280.09 277.15 276.86 277.14 277.42 277.70 277.98 278.26 278.54
283.76 283.76 280.96 277.68 277.29 277.54 277.78 278.02 278.27 278.51 278.75
283.65 283.65 281.27 278.19 277.74 277.95 278.15 278.36 278.56 278.77 278.97
283.06 283.06 281.28 278.58 278.14 278.31 278.48 278.65 278.82 278.99 279.16
282.70 282.70 281.22 278.85 278.44 278.59 278.73 278.88 279.02 279.17 279.31
281.77 281.77 280.89 279.02 278.67 278.79 278.92 279.04 279.17 279.30 279.42
280.27 280.27 280.20 279.07 278.80 278.92 279.03 279.15 279.26 279.38 279.49
279.44 279.44 279.55 278.97 278.82 278.93 279.05 279.16 279.27 279.39 279.50
279.58 279.58 279.36 278.82 278.76 278.88 278.99 279.11 279.23 279.35 279.47
279.52 279.52 279.18 278.71 278.68 278.81 278.93 279.06 279.18 279.31 279.43
280.03 280.03 279.26 278.53 278.47 278.61 278.76 278.90 279.04 279.18 279.33
280.67 280.67 279.56 278.54 278.45 278.59 278.74 278.88 279.03 279.17 279.32
281.43 281.43 279.97 278.63 278.49 278.63 278.77 278.91 279.05 279.20 279.34
282.17 282.17 280.45 278.78 278.58 278.72 278.85 278.98 279.12 279.25 279.38
282.84 282.84 281.03 278.99 278.73 278.85 278.97 279.09 279.21 279.33 279.45
283.10 283.10 281.37 279.25 278.92 279.03 279.13 279.23 279.34 279.44 279.55
283.75 283.75 281.88 279.52 279.14 279.22 279.31 279.40 279.48 279.57 279.65
284.08 284.08 282.28 279.81 279.38 279.44 279.51 279.57 279.64 279.71 279.77
283.69 283.69 282.31 280.07 279.61 279.66 279.70 279.75 279.79 279.84 279.89
282.86 282.86 282.06 280.23 279.80 279.83 279.86 279.89 279.92 279.95 279.98
282.71 282.71 281.81 280.28 279.91 279.93 279.95 279.97 279.99 280.01 280.03
282.79 282.79 281.81 280.30 279.96 279.98 280.00 280.01 280.03 280.04 280.06
282.57 282.57 281.76 280.37 280.05 280.06 280.07 280.08 280.08 280.09 280.10
282.62 282.62 281.72 280.39 280.07 280.08 280.08 280.09 280.10 280.10 280.11
282.31 282.31 281.70 280.42 280.11 280.11 280.12 280.12 280.12 280.13 280.13
282.61 282.61 281.65 280.43 280.14 280.15 280.15 280.15 280.15 280.15 280.15
282.98 282.98 281.96 280.48 280.18 280.18 280.18 280.17 280.17 280.17 280.17
282.76 282.76 281.90 280.56 280.26 280.25 280.24 280.23 280.22 280.21 280.20
283.26 283.26 282.15 280.64 280.33 280.31 280.30 280.28 280.27 280.25 280.24
282.81 282.81 282.05 280.74 280.41 280.39 280.37 280.34 280.32 280.30 280.28
282.85 282.85 282.08 280.79 280.48 280.45 280.42 280.39 280.36 280.34 280.31
282.57 282.57 281.98 280.83 280.52 280.49 280.46 280.43 280.39 280.36 280.33
282.45 282.45 281.90 280.84 280.56 280.53 280.49 280.46 280.42 280.39 280.35
282.50 282.50 281.81 280.85 280.59 280.55 280.51 280.47 280.44 280.40 280.36
282.88 282.88 282.06 280.87 280.60 280.56 280.52 280.48 280.45 280.41 280.37
282.56 282.56 281.95 280.92 280.64 280.60 280.56 280.52 280.47 280.43 280.39
282.80 282.80 281.98 280.94 280.67 280.63 280.58 280.54 280.49 280.45 280.40
284.79 284.79 282.73 281.01 280.71 280.66 280.61 280.57 280.52 280.47 280.42
285.85 285.85 283.75 281.28 280.84 280.79 280.73 280.67 280.61 280.55 280.49
285.24 285.24 283.88 281.62 281.10 281.02 280.94 280.86 280.78 280.70 280.61
285.56 285.56 284.05 281.86 281.33 281.23 281.13 281.03 280.93 280.83 280.73
285.45 285.45 284.16 282.06 281.52 281.41 281.29 281.17 281.05 280.94 280.82
285.35 285.35 284.11 282.21 281.69 281.56 281.42 281.29 281.16 281.03 280.90
285.74 285.74 284.26 282.34 281.81 281.67 281.53 281.39 281.25 281.11 280.96
286.33 286.33 284.60 282.49 281.95 281.79 281.64 281.49 281.33 281.18 281.03
286.54 286.54 284.87 282.69 282.10 281.94 281.77 281.60 281.44 281.27 281.11
286.75 286.75 285.02 282.88 282.28 282.10 281.92 281.74 281.55 281.37 281.19
287.11 287.11 285.23 283.06 282.44 282.25 282.05 281.86 281.66 281.47 281.27
287.15 287.15 285.41 283.24 282.62 282.41 282.20 281.99 281.78 281.57 281.36
286.44 286.44 285.43 283.63 283.06 282.81 282.57 282.32 282.07 281.82 281.57
285.21 285.21 284.98 283.72 283.19 282.93 282.67 282.42 282.16 281.90 281.64
285.09 285.09 284.67 283.68 283.23 282.96 282.70 282.44 282.18 281.92 281.66
285.25 285.25 284.58 283.60 283.18 282.92 282.66 282.41 282.15 281.89 281.63
285.50 285.50 284.60 283.55 283.14 282.88 282.63 282.38 282.12 281.87 281.61
285.65 285.65 284.68 283.54 283.13 282.87 282.62 282.37 282.11 281.86 281.61
285.86 285.86 284.78 283.58 283.15 282.90 282.64 282.38 282.13 281.87 281.62
286.02 286.02 284.94 283.65 283.20 282.94 282.68 282.42 282.16 281.90 281.64
286.02 286.02 285.01 283.73 283.27 283.00 282.74 282.47 282.21 281.94 281.68
285.79 285.79 284.97 283.78 283.32 283.05 282.78 282.51 282.24 281.97 281.70
285.81 285.81 285.00 283.82 283.36 283.09 282.81 282.54 282.27 281.99 281.72
285.70 285.70 284.97 283.88 283.42 283.14 282.87 282.59 282.31 282.03 281.75
285.81 285.81 284.99 283.89 283.44 283.16 282.88 282.60 282.32 282.04 281.76
285.95 285.95 285.03 283.91 283.46 283.18 282.90 282.62 282.33 282.05 281.77
286.18 286.18 285.13 283.93 283.47 283.19 282.91 282.62 282.34 282.06 281.78
286.52 286.52 285.26 283.98 283.51 283.23 282.94 282.65 282.37 282.08 281.80
287.02 287.02 285.48 284.06 283.57 283.27 282.98 282.69 282.40 282.11 281.82
287.49 287.49 285.78 284.17 283.64 283.34 283.04 282.75 282.45 282.15 281.86
288.01 288.01 286.08 284.33 283.76 283.45 283.14 282.84 282.53 282.22 281.92
288.49 288.49 286.47 284.54 283.92 283.60 283.28 282.96 282.64 282.32 281.99
288.35 288.35 286.68 284.72 284.05 283.72 283.39 283.06 282.72 282.39 282.06
287.11 287.11 286.44 284.83 284.15 283.81 283.47 283.13 282.79 282.45 282.11
286.83 286.83 286.13 284.86 284.24 283.89 283.54 283.20 282.85 282.50 282.15
287.38 287.38 286.15 284.85 284.27 283.92 283.57 283.22 282.87 282.52 282.17
287.85 287.85 286.35 284.88 284.30 283.94 283.59 283.24 282.88 282.53 282.18
288.18 288.18 286.53 284.96 284.36 284.00 283.64 283.28 282.93 282.57 282.21
288.63 288.63 286.79 285.07 284.44 284.07 283.71 283.34 282.98 282.61 282.25
288.67 288.67 286.97 285.25 284.61 284.23 283.85 283.47 283.09 282.71 282.33
288.75 288.75 287.11 285.45 284.82 284.42 284.03 283.63 283.23 282.83 282.44
288.48 288.48 287.25 285.66 285.01 284.60 284.18 283.77 283.35 282.94 282.53
287.84 287.84 287.08 285.69 285.03 284.61 284.20 283.78 283.37 282.95 282.54
287.36 287.36 286.79 285.61 284.97 284.56 284.15 283.74 283.33 282.92 282.51
287.36 287.36 286.63 285.54 284.94 284.54 284.13 283.72 283.31 282.90 282.50
287.54 287.54 286.61 285.51 284.94 284.53 284.12 283.71 283.31 282.90 282.49
287.59 287.59 286.63 285.49 284.91 284.50 284.10 283.69 283.29 282.88 282.48
287.88 287.88 286.68 285.47 284.89 284.48 284.08 283.68 283.28 282.87 282.47
287.87 287.87 286.76 285.49 284.90 284.49 284.09 283.69 283.28 282.88 282.47
287.97 287.97 286.78 285.52 284.92 284.52 284.11 283.70 283.30 282.89 282.48
288.52 288.52 287.01 285.63 285.02 284.61 284.19 283.78 283.36 282.95 282.53
289.10 289.10 287.30 285.71 285.05 284.63 284.22 283.80 283.38 282.97 282.55
289.52 289.52 287.57 285.81 285.12 284.69 284.27 283.85 283.43 283.00 282.58
289.30 289.30 287.73 285.94 285.21 284.78 284.35 283.92 283.49 283.06 282.63
288.53 288.53 287.54 286.03 285.32 284.88 284.44 284.00 283.56 283.12 282.68
288.60 288.60 287.44 286.06 285.38 284.94 284.49 284.05 283.60 283.16 282.71
289.01 289.01 287.54 286.08 285.42 284.97 284.52 284.07 283.62 283.17 282.73
289.34 289.34 287.68 286.13 285.45 285.00 284.55 284.10 283.65 283.20 282.75
289.43 289.43 287.81 286.20 285.51 285.05 284.60 284.14 283.68 283.23 282.77
289.24 289.24 287.85 286.27 285.57 285.11 284.65 284.19 283.72 283.26 282.80
288.66 288.66 287.67 286.31 285.62 285.15 284.69 284.22 283.76 283.29 282.83
287.93 287.93 287.41 286.29 285.64 285.18 284.71 284.24 283.77 283.31 282.84
287.36 287.36 287.05 286.22 285.62 285.16 284.69 284.22 283.76 283.29 282.83
287.44 287.44 286.87 286.11 285.55 285.09 284.63 284.17 283.71 283.25 282.79
287.74 287.74 286.86 286.06 285.54 285.08 284.62 284.16 283.70 283.25 282.79
288.24 288.24 287.07 286.05 285.50 285.05 284.59 284.14 283.68 283.22 282.77
288.09 288.09 287.12 286.05 285.49 285.03 284.58 284.12 283.67 283.22 282.76
288.53 288.53 287.24 286.13 285.54 285.08 284.63 284.17 283.71 283.25 282.79
288.49 288.49 287.42 286.22 285.60 285.14 284.67 284.21 283.74 283.28 282.82
287.77 287.77 287.25 286.23 285.62 285.15 284.69 284.22 283.76 283.29 282.83
287.48 287.48 287.05 286.20 285.61 285.15 284.68 284.22 283.75 283.29 282.82
287.03 287.03 286.80 286.13 285.58 285.12 284.66 284.20 283.73 283.27 282.81
287.09 287.09 286.64 286.03 285.52 285.06 284.60 284.15 283.69 283.23 282.78
286.92 286.92 286.51 285.94 285.44 284.99 284.54 284.09 283.64 283.19 282.74
286.88 286.88 286.38 285.84 285.36 284.91 284.47 284.03 283.58 283.14 282.70
287.04 287.04 286.37 285.75 285.28 284.84 284.41 283.97 283.53 283.10 282.66
287.49 287.49 286.45 285.70 285.21 284.78 284.35 283.92 283.49 283.06 282.63
287.75 287.75 286.63 285.72 285.21 284.78 284.35 283.92 283.49 283.06 282.63
287.80 287.80 286.82 285.82 285.27 284.84 284.40 283.96 283.53 283.09 282.66
287.39 287.39 286.72 285.85 285.29 284.86 284.42 283.98 283.54 283.10 282.67
287.21 287.21 286.64 285.84 285.30 284.86 284.43 283.99 283.55 283.11 282.67
286.80 286.80 286.46 285.81 285.29 284.85 284.42 283.98 283.54 283.10 282.67
287.12 287.12 286.40 285.75 285.25 284.82 284.38 283.95 283.51 283.08 282.65
287.31 287.31 286.49 285.72 285.22 284.79 284.36 283.93 283.49 283.06 282.63
287.38 287.38 286.53 285.73 285.21 284.78 284.35 283.92 283.49 283.06 282.63
287.25 287.25 286.53 285.74 285.22 284.79 284.36 283.93 283.49 283.06 282.63
287.43 287.43 286.54 285.74 285.22 284.79 284.36 283.93 283.49 283.06 282.63
288.17 288.17 286.74 285.75 285.23 284.79 284.36 283.93 283.50 283.07 282.63
288.24 288.24 286.97 285.82 285.26 284.83 284.39 283.96 283.52 283.09 282.65
287.47 287.47 286.89 285.90 285.32 284.88 284.44 284.00 283.56 283.12 282.68
287.01 287.01 286.65 285.91 285.36 284.91 284.47 284.03 283.58 283.14 282.70
286.92 286.92 286.54 285.87 285.35 284.91 284.47 284.02 283.58 283.14 282.70
286.70 286.70 286.44 285.85 285.35 284.91 284.46 284.02 283.58 283.14 282.69
286.73 286.73 286.37 285.81 285.32 284.88 284.44 284.00 283.56 283.12 282.68
286.63 286.63 286.32 285.76 285.28 284.84 284.41 283.97 283.53 283.10 282.66
286.60 286.60 286.24 285.72 285.24 284.81 284.37 283.94 283.51 283.07 282.64
286.68 286.68 286.20 285.67 285.20 284.77 284.34 283.91 283.48 283.05 282.62
286.57 286.57 286.19 285.64 285.17 284.75 284.32 283.89 283.46 283.04 282.61
286.26 286.26 286.05 285.61 285.15 284.72 284.30 283.87 283.45 283.02 282.60
286.32 286.32 285.98 285.56 285.11 284.69 284.27 283.85 283.42 283.00 282.58
286.36 286.36 285.97 285.51 285.07 284.65 284.23 283.81 283.39 282.97 282.56
286.14 286.14 285.91 285.48 285.04 284.62 284.21 283.79 283.37 282.96 282.54
285.98 285.98 285.79 285.43 285.01 284.59 284.18 283.77 283.35 282.94 282.53
285.82 285.82 285.70 285.38 284.96 284.55 284.15 283.74 283.33 282.92 282.51
285.84 285.84 285.62 285.32 284.92 284.51 284.11 283.70 283.30 282.89 282.48
285.60 285.60 285.53 285.28 284.88 284.47 284.07 283.67 283.27 282.87 282.46
286.20 286.20 285.62 285.23 284.84 284.44 284.04 283.64 283.24 282.84 282.44
285.67 285.67 285.62 285.23 284.81 284.41 284.02 283.62 283.22 282.83 282.43
285.48 285.48 285.42 285.20 284.80 284.41 284.01 283.61 283.22 282.82 282.43
284.73 284.73 285.13 285.13 284.76 284.37 283.98 283.58 283.19 282.80 282.41
284.32 284.32 284.77 285.00 284.68 284.29 283.91 283.52 283.14 282.75 282.37
284.81 284.81 284.72 284.84 284.56 284.18 283.81 283.43 283.06 282.68 282.31
285.25 285.25 284.96 284.78 284.47 284.10 283.73 283.36 283.00 282.63 282.26
284.98 284.98 284.99 284.78 284.44 284.07 283.71 283.34 282.98 282.61 282.25
283.89 283.89 284.49 284.74 284.42 284.06 283.70 283.33 282.97 282.60 282.24
282.85 282.85 283.92 284.59 284.34 283.98 283.63 283.27 282.91 282.56 282.20
282.56 282.56 283.43 284.34 284.18 283.84 283.50 283.15 282.81 282.47 282.12
281.91 281.91 282.98 284.08 283.98 283.66 283.33 283.01 282.68 282.35 282.03
283.21 283.21 283.21 283.85 283.78 283.47 283.16 282.85 282.54 282.23 281.92
282.45 282.45 283.12 283.76 283.64 283.34 283.05 282.75 282.45 282.16 281.86
282.10 282.10 282.79 283.63 283.54 283.25 282.96 282.67 282.38 282.10 281.81
283.51 283.51 283.12 283.49 283.40 283.13 282.85 282.57 282.30 282.02 281.74
282.71 282.71 283.16 283.49 283.34 283.07 282.80 282.53 282.25 281.98 281.71
281.39 281.39 282.53 283.41 283.31 283.04 282.77 282.50 282.23 281.97 281.70
282.14 282.14 282.49 283.23 283.18 282.92 282.67 282.41 282.15 281.89 281.63
281.30 281.30 282.19 283.10 283.05 282.81 282.56 282.31 282.07 281.82 281.57
281.57 281.57 282.11 282.95 282.93 282.69 282.46 282.22 281.98 281.75 281.51
281.38 281.38 281.98 282.82 282.81 282.58 282.36 282.13 281.90 281.68 281.45
282.03 282.03 282.20 282.73 282.70 282.48 282.27 282.05 281.83 281.62 281.40
281.28 281.28 281.92 282.67 282.63 282.42 282.21 282.00 281.79 281.58 281.37
279.87 279.87 281.30 282.54 282.55 282.35 282.14 281.94 281.73 281.53 281.33
279.82 279.82 280.88 282.29 282.39 282.20 282.01 281.82 281.63 281.44 281.25
280.27 280.27 280.93 282.08 282.20 282.02 281.85 281.67 281.50 281.33 281.15
278.94 278.94 280.40 281.92 282.05 281.88 281.72 281.56 281.40 281.24 281.08
279.14 279.14 280.21 281.70 281.88 281.73 281.58 281.44 281.29 281.14 280.99
278.28 278.28 279.78 281.49 281.70 281.57 281.44 281.30 281.17 281.04 280.91
277.82 277.82 279.28 281.23 281.50 281.38 281.27 281.15 281.04 280.92 280.81
278.23 278.23 279.21 280.97 281.27 281.17 281.08 280.98 280.89 280.79 280.70
278.79 278.79 279.40 280.80 281.08 281.00 280.92 280.84 280.77 280.69 280.61
279.15 279.15 279.58 280.73 280.97 280.90 280.83 280.76 280.69 280.62 280.55
279.15 279.15 279.68 280.70 280.90 280.84 280.77 280.71 280.65 280.58 280.52
279.10 279.10 279.66 280.67 280.86 280.80 280.74 280.68 280.62 280.56 280.50
278.31 278.31 279.38 280.62 280.81 280.75 280.70 280.64 280.59 280.53 280.47
277.85 277.85 278.98 280.48 280.72 280.67 280.63 280.58 280.53 280.48 280.43
277.66 277.66 278.81 280.32 280.59 280.55 280.52 280.48 280.44 280.40 280.37
278.15 278.15 278.78 280.16 280.45 280.43 280.40 280.37 280.35 280.32 280.30
278.17 278.17 278.84 280.06 280.34 280.32 280.30 280.29 280.27 280.26 280.24
278.33 278.33 278.87 280.00 280.26 280.25 280.24 280.23 280.22 280.21 280.20
278.46 278.46 278.96 279.96 280.20 280.20 280.19 280.19 280.18 280.18 280.17
278.71 278.71 279.04 279.94 280.16 280.16 280.16 280.16 280.16 280.16 280.16
278.95 278.95 279.22 279.94 280.14 280.14 280.14 280.14 280.14 280.14 280.14
278.66 278.66 279.15 279.96 280.14 280.14 280.14 280.14 280.14 280.14 280.14
279.21 279.21 279.31 279.95 280.13 280.13 280.13 280.13 280.14 280.14 280.14
278.71 278.71 279.27 279.98 280.13 280.13 280.13 280.13 280.14 280.14 280.14
279.53 279.53 279.42 279.97 280.12 280.12 280.13 280.13 280.13 280.13 280.14
279.78 279.78 279.72 280.02 280.13 280.13 280.13 280.14 280.14 280.14 280.14
279.84 279.84 279.84 280.10 280.18 280.18 280.18 280.17 280.17 280.17 280.17
279.77 279.77 279.87 280.16 280.23 280.22 280.22 280.21 280.20 280.20 280.19
279.65 279.65 279.85 280.20 280.27 280.26 280.25 280.24 280.23 280.22 280.21
279.40 279.40 279.74 280.21 280.29 280.28 280.26 280.25 280.24 280.23 280.22
279.30 279.30 279.66 280.19 280.28 280.27 280.26 280.25 280.24 280.23 280.22
278.58 278.58 279.43 280.16 280.27 280.26 280.25 280.24 280.23 280.22 280.21
277.69 277.69 278.93 280.05 280.21 280.21 280.20 280.20 280.19 280.19 280.18
277.77 277.77 278.61 279.87 280.10 280.10 280.11 280.11 280.12 280.12 280.12
277.96 277.96 278.63 279.71 279.96 279.97 279.99 280.01 280.02 280.04 280.06
277.72 277.72 278.50 279.60 279.85 279.87 279.90 279.93 279.95 279.98 280.00
277.50 277.50 278.32 279.49 279.75 279.79 279.82 279.85 279.89 279.92 279.96
277.14 277.14 278.17 279.38 279.65 279.69 279.73 279.78 279.82 279.86 279.90
276.24 276.24 277.68 279.24 279.55 279.60 279.65 279.70 279.75 279.80 279.85
276.07 276.07 277.33 279.03 279.40 279.46 279.53 279.59 279.65 279.72 279.78
276.41 276.41 277.27 278.83 279.22 279.30 279.38 279.46 279.54 279.62 279.70
276.64 276.64 277.34 278.68 279.07 279.16 279.25 279.35 279.44 279.53 279.62
276.12 276.12 277.18 278.58 278.96 279.06 279.16 279.26 279.36 279.46 279.57
275.07 275.07 276.62 278.44 278.86 278.97 279.08 279.19 279.30 279.41 279.52
274.75 274.75 276.21 278.22 278.70 278.82 278.95 279.07 279.19 279.32 279.44
274.77 274.77 276.05 278.00 278.51 278.65 278.79 278.93 279.07 279.21 279.35
274.98 274.98 276.01 277.82 278.33 278.49 278.64 278.80 278.95 279.11 279.26
275.38 275.38 276.12 277.69 278.19 278.36 278.53 278.69 278.86 279.03 279.19
275.81 275.81 276.32 277.62 278.09 278.26 278.44 278.61 278.79 278.96 279.14
274.90 274.90 276.04 277.57 278.03 278.21 278.39 278.57 278.75 278.93 279.11
274.45 274.45 275.72 277.46 277.95 278.14 278.33 278.51 278.70 278.89 279.07
274.02 274.02 275.38 277.29 277.83 278.03 278.22 278.42 278.62 278.82 279.01
274.47 274.47 275.31 277.11 277.68 277.89 278.10 278.31 278.52 278.73 278.94
274.71 274.71 275.49 277.01 277.55 277.77 277.99 278.21 278.44 278.66 278.88
275.16 275.16 275.64 276.97 277.48 277.71 277.93 278.16 278.39 278.62 278.84
274.38 274.38 275.49 276.95 277.44 277.67 277.90 278.13 278.36 278.59 278.82
274.10 274.10 275.17 276.86 277.39 277.62 277.86 278.09 278.33 278.56 278.80
273.95 273.95 275.06 276.75 277.29 277.54 277.78 278.02 278.27 278.51 278.75
273.60 273.60 274.81 276.63 277.20 277.45 277.70 277.95 278.20 278.45 278.71
273.52 273.52 274.66 276.49 277.09 277.35 277.61 277.87 278.13 278.39 278.65
273.54 273.54 274.59 276.38 276.98 277.25 277.52 277.79 278.06 278.33 278.60
273.50 273.50 274.53 276.28 276.88 277.16 277.44 277.72 277.99 278.27 278.55
273.47 273.47 274.47 276.20 276.80 277.09 277.37 277.66 277.94 278.23 278.51
273.40 273.40 274.40 276.12 276.72 277.02 277.31 277.60 277.89 278.18 278.47
273.38 273.38 274.35 276.04 276.64 276.94 277.24 277.54 277.84 278.13 278.43
273.37 273.37 274.32 275.97 276.57 276.88 277.18 277.49 277.79 278.10 278.40
273.35 273.35 274.28 275.90 276.50 276.81 277.12 277.43 277.74 278.06 278.37
273.29 273.29 274.22 275.83 276.43 276.75 277.07 277.38 277.70 278.02 278.33
273.25 273.25 274.17 275.76 276.37 276.69 277.01 277.33 277.65 277.98 278.30
273.24 273.24 274.13 275.70 276.31 276.63 276.96 277.29 277.61 277.94 278.27
273.24 273.24 274.10 275.65 276.25 276.58 276.92 277.25 277.58 277.91 278.24
273.24 273.24 274.08 275.59 276.20 276.53 276.87 277.21 277.54 277.88 278.22
273.24 273.24 274.06 275.55 276.15 276.49 276.83 277.17 277.51 277.85 278.19
273.25 273.25 274.04 275.50 276.10 276.45 276.79 277.13 277.48 277.82 278.17
273.28 273.28 274.04 275.46 276.06 276.40 276.75 277.10 277.45 277.80 278.15
273.29 273.29 274.03 275.43 276.02 276.37 276.72 277.07 277.42 277.78 278.13
273.25 273.25 274.01 275.38 275.97 276.33 276.68 277.04 277.39 277.75 278.11
273.27 273.27 273.99 275.35 275.94 276.30 276.66 277.01 277.37 277.73 278.09
273.09 273.09 273.89 275.30 275.89 276.25 276.62 276.98 277.34 277.70 278.07
273.04 273.04 273.82 275.26 275.85 276.22 276.58 276.95 277.32 277.68 278.05
273.11 273.11 273.84 275.22 275.81 276.18 276.55 276.92 277.29 277.66 278.03
273.19 273.19 273.89 275.20 275.79 276.16 276.53 276.90 277.27 277.64 278.01
273.09 273.09 273.84 275.17 275.76 276.13 276.51 276.88 277.25 277.63 278.00
273.09 273.09 273.84 275.17 275.76 276.13 276.51 276.88 277.25 277.63 278.00
